# Supplementary material
Source: PubMed Central journal article supplement (PMC7592121)
Supplement: mmc1.pdf [file mmc1.pdf]

# THE LANCET

## Rheumatology

### Supplementary appendix

This appendix formed part of the original submission and has been peer reviewed.  
We post it as supplied by the authors.

Supplement to: Lane JCE, Weaver J, Kostka K, et al. Risk of hydroxychloroquine alone and in combination with azithromycin in the treatment of rheumatoid arthritis: a multinational, retrospective study. *Lancet Rheumatol* 2020; published online Aug 21. [https://doi.org/10.1016/S2665-9913\(20\)30276-9](https://doi.org/10.1016/S2665-9913(20)30276-9).

**Supplemental Appendix to *Risk of hydroxychloroquine alone and in combination with azithromycin in the treatment of rheumatoid arthritis: a multi-national, retrospective study***

Jennifer C.E. Lane, James Weaver, Kristin Kostka, Talita Duarte-Salles, Maria Tereza F. Abrahao, Heba Alghoul, Osaid Alser, Thamir M Alshammari, Patricia Biedermann, Juan M. Banda, Edward Burn, Paula Casajust, Mitch Conover, Aedin C. Culhane, Alexander Davydov, Scott L. DuVall, Dmitry Dymshyts, Sergio Fernandez-Bertolin, Kristina Fišter, Jill Hardin, Laura Hester, George Hripcsak, Seamus Kent, Sajan Khosla, Spyros Kolovos, Christophe G. Lambert, Johan van der Lei, Kristine E. Lynch, Rupa Makadia, Andrea V. Margulis, Michael E. Matheny, Paras Mehta, Daniel R. Morales, Henry Morgan-Stewart, Mees Mosseveld, Danielle Newby, Fredrik Nyberg, Anna Ostropolets, Rae Woong Park, Albert Prats-Urbe, Junqing Xie, Gowtham A. Rao, Christian Reich, Jenna Reps, Peter Rijnbeek, Selva Muthu Kumaran Sathappan, Martijn Schuemie, Sarah Seager, Anthony Sena, Azza Shoaibi, Matthew Spotnitz, Marc A. Suchard, Carmen O. Torre, David Vizcaya, Haini Wen, Marcel de Wilde, Seng Chan You, Lin Zhang, Oleg Zhuk, Patrick Ryan, and Daniel Prieto-Alhambra

All artefacts generated as part of this study are publicly available in an interactive, web-based application at:

<http://evidence.ohdsi.org/Covid19EstimationHydroxychloroquine>

Contents

|                                                                              |    |
|------------------------------------------------------------------------------|----|
| S1. Data sources.....                                                        | 3  |
| S2. Cohort definitions.....                                                  | 5  |
| S2.1. Exposures.....                                                         | 5  |
| S2.1.1. New users of Hydroxychloroquine with prior rheumatoid arthritis..... | 5  |
| S2.1.2. New users of sulfasazine with prior rheumatoid arthritis.....        | 6  |
| S2.1.3. Users of Hydroxychloroquine + Azithromycin.....                      | 7  |
| S2.1.4. Users of Hydroxychloroquine + Amoxicillin.....                       | 8  |
| S2.2. Outcomes.....                                                          | 8  |
| S3. Negative control outcomes.....                                           | 10 |
| S4. Covariate construction.....                                              | 11 |
| S5. Exposure cohort counts.....                                              | 12 |
| S6. Covariate balance before and after PS stratification.....                | 13 |
| S6.1. HCQ vs SSZ.....                                                        | 13 |
| S6.1.1. AmbEMR.....                                                          | 13 |
| S6.1.2. CCAE.....                                                            | 15 |
| S6.1.3. CPRD.....                                                            | 17 |
| S6.1.4. Clinformatics.....                                                   | 19 |
| S6.1.5. DAGermany.....                                                       | 21 |
| S6.1.6. IMRD.....                                                            | 23 |
| S6.1.7. IPCI.....                                                            | 25 |
| S6.1.8. JMDC.....                                                            | 27 |
| S6.1.9. MDCD.....                                                            | 29 |
| S6.1.10. MDCR.....                                                           | 31 |
| S6.1.11. OpenClaims.....                                                     | 33 |
| S6.1.12. OptumEHR.....                                                       | 35 |
| S6.1.13. SIDIAP.....                                                         | 37 |
| S6.1.14. VA.....                                                             | 39 |
| S6.2. AZM vs AMX.....                                                        | 41 |
| S6.2.1. AmbEMR.....                                                          | 41 |
| S6.2.2. CCAE.....                                                            | 43 |
| S6.2.3. Clinformatics.....                                                   | 45 |
| S6.2.4. CPRD.....                                                            | 47 |
| S6.2.5. DAGermany.....                                                       | 49 |
| S6.2.6. IMRD.....                                                            | 51 |
| S6.2.8. MDCD.....                                                            | 54 |
| S6.2.9. MDCR.....                                                            | 56 |
| S6.2.10. OpenClaims.....                                                     | 58 |
| S6.2.11. OptumEHR.....                                                       | 60 |
| S6.2.12. SIDIAP.....                                                         | 62 |
| S6.2.13. VA.....                                                             | 64 |
| S7. Patient counts, events, incident rates.....                              | 66 |
| S8. Calibrated hazard ratio forest plots.....                                | 72 |
| S8.1. 30-day follow-up.....                                                  | 72 |
| S8.1.1. All-cause mortality.....                                             | 72 |
| S8.1.2. CV-related mortality.....                                            | 73 |

|                                                                       |     |
|-----------------------------------------------------------------------|-----|
| S8.1.3. Myocardial infarction .....                                   | 74  |
| S8.1.4. Chest pain or angina .....                                    | 75  |
| S8.1.5. Heart failure .....                                           | 76  |
| S8.1.6. Cardiovascular events .....                                   | 77  |
| S8.1.7. Cardiac arrhythmia .....                                      | 78  |
| S8.1.8. Bradycardia .....                                             | 79  |
| S8.1.9. Transient ischemic attack .....                               | 80  |
| S8.1.10. Stroke .....                                                 | 81  |
| S8.1.11. Venous thromboembolism .....                                 | 82  |
| S8.1.12. Gastrointestinal bleeding .....                              | 83  |
| S8.1.13. Acute renal failure .....                                    | 84  |
| S8.1.14. End stage renal disease .....                                | 85  |
| S8.1.15. Hepatic failure .....                                        | 86  |
| S8.1.16. Acute pancreatitis .....                                     | 87  |
| S8.2. On-treatment follow-up .....                                    | 88  |
| S8.2.1. All-cause mortality .....                                     | 88  |
| S8.2.2. CV-related mortality .....                                    | 89  |
| S8.2.3. Myocardial infarction .....                                   | 90  |
| S8.2.4. Chest pain or angina .....                                    | 91  |
| S8.2.5. Heart failure .....                                           | 92  |
| S8.2.6. Cardiovascular events .....                                   | 93  |
| S8.2.7. Cardiac arrhythmia .....                                      | 94  |
| S8.2.8. Bradycardia .....                                             | 95  |
| S8.2.9. Transient ischemic attack .....                               | 96  |
| S8.2.10. Stroke .....                                                 | 97  |
| S8.2.11. Venous thromboembolism .....                                 | 98  |
| S8.2.12. Gastrointestinal bleeding .....                              | 99  |
| S8.2.13. Acute renal failure .....                                    | 100 |
| S8.2.14. End stage renal disease .....                                | 101 |
| S8.2.15. Hepatic failure .....                                        | 102 |
| S8.2.16. Acute pancreatitis .....                                     | 103 |
| S9. Evidence evaluation diagnostics .....                             | 104 |
| S9.1. AmbEMR .....                                                    | 105 |
| S9.2. CCAE .....                                                      | 106 |
| S9.3. Clinformatics .....                                             | 107 |
| S9.4. CPRD .....                                                      | 108 |
| S9.5. DAGermany .....                                                 | 109 |
| S9.6. IMRD .....                                                      | 110 |
| S9.7. IPCI .....                                                      | 111 |
| S9.8. JMDC .....                                                      | 112 |
| S9.9. MDCD .....                                                      | 113 |
| S9.10. MDCR .....                                                     | 114 |
| S9.11. OpenClaims .....                                               | 115 |
| S9.12. OptumEHR .....                                                 | 116 |
| S9.13. SIDIAP .....                                                   | 117 |
| S9.14. VA .....                                                       | 118 |
| S10. Self-controlled case series results for hydroxychloroquine ..... | 119 |
| S10.1. CCAE .....                                                     | 119 |
| S10.2. Clinformatics .....                                            | 120 |
| S10.3. CPRD .....                                                     | 121 |
| S10.4. JMDC .....                                                     | 122 |
| S10.5. MDCD .....                                                     | 123 |
| S10.6. MDCR .....                                                     | 124 |
| S10.7. VA .....                                                       | 125 |
| S11. Literature review sources .....                                  | 126 |
| S11.1. PubMed search strategy .....                                   | 126 |
| S11.2. Embase search strategy (1974 to present) .....                 | 127 |
| S11.3. ClinicalTrials.gov search strategy .....                       | 129 |
| S11.4. ICTRP strategy .....                                           | 129 |
| S12. Ethical Approval .....                                           | 130 |
| S13. References .....                                                 | 131 |

## S1. Data sources

| Database name                                         | Abbreviation  | Population                                                                | Patients (millions) | Data History | Data capture process and short database description                                                                                                                                                                                                                                                                                                                                                                                                                          |
|-------------------------------------------------------|---------------|---------------------------------------------------------------------------|---------------------|--------------|------------------------------------------------------------------------------------------------------------------------------------------------------------------------------------------------------------------------------------------------------------------------------------------------------------------------------------------------------------------------------------------------------------------------------------------------------------------------------|
| Department of Veterans Affairs                        | VA            | USA (Veteran population)                                                  | ~12M                | 2000 –       | VA OMOP data reflects the national Department of Veterans Affairs health care system, which is the largest integrated provider of medical and mental health services in the United States. Care is provided at 170 VA Medical Centers and 1,063 outpatient sites serving more than 9 million enrolled Veterans each year.                                                                                                                                                    |
| IQVIA Disease Analyzer Germany                        | DAGermany     | Germany (General population)                                              | 37M                 | 1992 –       | Anonymized patient records collected from Patient Management software used by general practitioners and selected specialists to document patients' medical records within their office-based practice during a visit.                                                                                                                                                                                                                                                        |
| IQVIA UK Integrated Medical Record Data               | IMRD          | UK (General population)                                                   | 15M                 | 1989 –       | Pseudonymized Electronic Medical Records collected from patient management software used within UK Primary Care                                                                                                                                                                                                                                                                                                                                                              |
| IQVIA US Ambulatory EMR                               | AmbEMR        | USA (General population)                                                  | 49M                 | 2006 –       | General practice EHR, Outpatient specialist EHR - Dataset consists of longitudinal, de-identified ambulatory electronic health records data                                                                                                                                                                                                                                                                                                                                  |
| IQVIA US LRxDx Open Claims                            | OpenClaims    | USA (General population)                                                  | 654M                | 2010 –       | Pre-adjudicated claims at the anonymized patient level collected from office-based physicians and specialists via office management software and clearinghouse switch sources for the purpose of reimbursement.                                                                                                                                                                                                                                                              |
| Clinical Practice Research Datalink                   | CPRD          | UK (General population)                                                   | 13M                 | 1995 –       | De-identified patient data from a network of general practitioners' practices across the UK. Primary care data are linked to a range of other health related data to provide a longitudinal, representative UK population health dataset.                                                                                                                                                                                                                                    |
| IBM MarketScan Commercial Claims                      | CCAIE         | USA (Patients with commercial insurance aged <65 years)                   | 142M                | 2000 –       | Data from individuals enrolled in US employer-sponsored insurance health plans. The data includes adjudicated health insurance claims (e.g. inpatient, outpatient, and outpatient pharmacy) as well as enrollment data from large employers and health plans who provide private healthcare coverage to employees, their spouses, and dependents. Additionally, it captures laboratory tests for a subset of the covered lives.                                              |
| IBM MarketScan Multi-State Medicaid Database          | MDCD          | USA                                                                       | 26M                 | 2006 –       | Adjudicated US health insurance claims for Medicaid enrollees from multiple states and includes hospital discharge diagnoses, outpatient diagnoses and procedures, and outpatient pharmacy claims as well as ethnicity and Medicare eligibility.                                                                                                                                                                                                                             |
| IBM MarketScan Medicare Supplemental Database         | MDCR          | USA (Patients with commercial insurance aged 65+ years)                   | 10M                 | 2000 –       | Represents health services of retirees (aged 65 or older) in the United States with primary or Medicare supplemental coverage through privately insured fee-for-service, point-of-service, or capitated health plans. These data include adjudicated health insurance claims (e.g. inpatient, outpatient, and outpatient pharmacy). Additionally, it captures laboratory tests for a subset of the covered lives.                                                            |
| Integrated Primary Care Information                   | IPCI          | Netherlands (General Population)                                          | 2.5M                | 1996-        | Complete medical records collected from 450 general practitioners with geographical representation of the country.                                                                                                                                                                                                                                                                                                                                                           |
| Japan Medical Data Center                             | JMDC          | Japan (insured general population)                                        | 5.5M                | 2005 –       | Data from 60 Society-Managed Health Insurance plans covering workers aged 18 to 65 and their dependents (children younger than 18 years old and elderly people older than 65 years old). JMDC data includes membership status of the insured people and claims data provided by insurers under contract (e.g. patient-level demographic information, inpatient and outpatient data inclusive of diagnosis and procedures, and prescriptions as dispensed claims information) |
| Optum de-identified Clinformatics® Data Mart Database | Clinformatics | USA (Patients with commercial insurance or commercial Medicare insurance) | 85M                 | 2000 -       | Inpatient and outpatient healthcare insurance claims                                                                                                                                                                                                                                                                                                                                                                                                                         |



**S1, continued.**

| <b>Database name</b>                                  | <b>Abbreviation</b> | <b>Population</b>                           | <b>Patients (millions)</b> | <b>Data History</b> | <b>Data capture process and short database description</b>                                                                                                                                                                                                                                                                                               |
|-------------------------------------------------------|---------------------|---------------------------------------------|----------------------------|---------------------|----------------------------------------------------------------------------------------------------------------------------------------------------------------------------------------------------------------------------------------------------------------------------------------------------------------------------------------------------------|
| Optum® de-identified Electronic Health Record Dataset | OptumEHR            | USA (General population)                    | 93M                        | 2006 –              | Optum's de-identified electronic health record data medical records database. The medical record data includes clinical information, inclusive of prescriptions as prescribed and administered, lab results, vital signs, body measurements, diagnoses, procedures, and information derived from clinical notes using Natural Language Processing (NLP). |
| The Information System for Research in Primary Care   | SIDIAP              | Spain-Catalonia (80% of general population) | 7.7M                       | 2006 –              | Electronic health records from primary care partially linked to inpatient data. SIDIAP is also linked to a pharmacy dispensations and primary care laboratories. Healthcare is universal and taxpayer funded in the region, and primary care physicians are gatekeepers for all care and responsible for repeat prescriptions.                           |

## S2. Cohort definitions

### S2.1. Exposures

In the HCQ versus SSZ study, the index event was defined as the first recorded dispensing or prescription of the drug in a patient's history. For the study of HCQ combined with AZM, follow up started when the second of the two co-administered treatments was initiated while still exposed to the first treatment (e.g. when AZM started during a period of HCQ use, or when HCQ started during a period of AZM use). HCQ use was assumed to be chronic in the management of RA, and AZM was assumed an acute prescription for infection treatment, and therefore inferred persistent exposure to AZM was assessed by allowing up to 30 days between dispensing or prescription records. Cohorts of combined HCQ and amoxicillin were generated using these same rules as an active comparator.

Exposure commenced on the first day of dispensing or prescription recorded with at least 365 days of prior observation period to increase confidence that the exposure was incident. Exposure interval gaps of  $\leq 90$  days (HCQ and SSZ) and of  $\leq 30$  days (AZM and AMX) between drug dispensing or prescription records were allowed and inferred as persistent exposure. Drug discontinuation was considered in the HCQ study if a patient switched from one study drug to another. Patients who switched from target exposure to comparator exposure, or vice versa, contributed follow-up time to the exposure cohort that they entered first, and were censored at the time of switching in the 'on treatment' analysis.

To view the concept sets and source code lists (e.g. NDC) associated with each outcome, navigate to the URL associated with each exposure cohort name. Then, navigate to the *Concept Sets* tab. The concept sets used in defining the outcome are listed on this page. After selecting a concept set to view, a user can explore the standard concepts used in the definition or the source codes from which the standard concepts are mapped.

#### S2.1.1. New users of Hydroxychloroquine with prior rheumatoid arthritis

<https://atlas.ohdsi.org/#/cohortdefinition/173>

##### Initial Event Cohort

People having any of the following:

- a drug exposure of [OHDSI Cov19] Hydroxychloroquine<sup>1</sup>
  - for the first time in the person's history
  - with age  $\geq 18$

with continuous observation of at least 365 days prior and 0 days after event index date, and limit initial events to: **earliest event per person.**

##### Inclusion Rules

Inclusion Criteria #1: has rheumatoid arthritis recorded any time on or prior to treatment

Having any of the following criteria:

- at least 1 occurrence of a condition occurrence of [OHDSI Cov19] Rheumatoid arthritis<sup>2</sup> where event starts between all days Before and 0 days After index start date
- or at least 1 occurrence of an observation of [OHDSI Cov19] Rheumatoid arthritis<sup>2</sup> where event starts between all days Before and 0 days After index start date

Limit qualifying cohort to: **earliest event per person.**

##### End Date Strategy

###### Custom Drug Era Exit Criteria

This strategy creates a drug era from the codes found in the specified concept set. If the index event is found within an era, the cohort end date will use the era's end date. Otherwise, it will use the observation period end date that contains the index event.

Use the era end date of [OHDSI Cov19] Hydroxychloroquine<sup>1</sup>

- allowing 90 days between exposures
- adding 0 days after exposure end

##### Cohort Collapse Strategy:

Collapse cohort by era with a gap size of 0 days.

### S2.1.2. New users of sulfasalazine with prior rheumatoid arthritis

<https://atlas.ohdsi.org/#/cohortdefinition/45>

#### Initial Event Cohort

People having any of the following:

- a drug exposure of [OHDSI Cov19] sulfasalazine<sup>2</sup>
  - for the first time in the person's history

with continuous observation of at least 365 days prior and 0 days after event index date, and limit initial events to: **earliest event per person.**

#### Inclusion Rules

Inclusion Criteria #1: has rheumatoid arthritis recorded any time on or prior to treatment

Having all of the following criteria:

- at least 1 occurrence of a condition occurrence of [OHDSI Cov19] Rheumatoid arthritis<sup>1</sup> where event starts between all days Before and 0 days After index start date

Limit qualifying cohort to: **earliest event per person.**

#### End Date Strategy

##### Custom Drug Era Exit Criteria

This strategy creates a drug era from the codes found in the specified concept set. If the index event is found within an era, the cohort end date will use the era's end date. Otherwise, it will use the observation period end date that contains the index event.

Use the era end date of [OHDSI Cov19] sulfasalazine<sup>2</sup>

- allowing 90 days between exposures
- adding 0 days after exposure end

Cohort Collapse Strategy:

Collapse cohort by era with a gap size of 0 days.

### S2.1.3. Users of Hydroxychloroquine + Azithromycin

<https://atlas.ohdsi.org/#/cohortdefinition/170>

#### Initial Event Cohort

People having any of the following:

- a drug exposure of Hydroxychloroquine<sup>1</sup>
  - with age  $\geq$  18
- a drug exposure of [OHDSI Covid19] Azithromycin<sup>3</sup>
  - with age  $\geq$  18

with continuous observation of at least 365 days prior and 0 days after event index date, and limit initial events to: **all events per person.**

#### Inclusion Rules

Inclusion Criteria #1: has both drugs on index

Having all of the following criteria:

- at least 1 occurrence of a drug exposure of Hydroxychloroquine<sup>1</sup> where event starts between 30 days Before and 0 days After index start date
- and at least 1 occurrence of a drug exposure of [OHDSI Covid19] Azithromycin<sup>3</sup> where event starts between 30 days Before and 0 days After index start date

Inclusion Criteria #2: prior diagnosis of RA

Having any of the following criteria:

- at least 1 occurrence of a condition occurrence of [OHDSI Cov19] Rheumatoid arthritis<sup>2</sup> where event starts between all days Before and 0 days After index start date
- or at least 1 occurrence of an observation of [OHDSI Cov19] Rheumatoid arthritis<sup>2</sup> where event starts between all days Before and 0 days After index start date

Limit qualifying cohort to: **earliest event per person.**

#### End Date Strategy

##### Custom Drug Era Exit Criteria

This strategy creates a drug era from the codes found in the specified concept set. If the index event is found within an era, the cohort end date will use the era's end date. Otherwise, it will use the observation period end date that contains the index event.

Use the era end date of [OHDSI Covid19] Azithromycin<sup>3</sup>

- allowing 30 days between exposures
- adding 0 days after exposure end

##### Cohort Collapse Strategy:

Collapse cohort by era with a gap size of 0 days.

### S2.1.4. Users of Hydroxychloroquine + Amoxicillin

<https://atlas.ohdsi.org/#/cohortdefinition/171>

#### Initial Event Cohort

People having any of the following:

- a drug exposure of Hydroxychloroquine<sup>1</sup>
  - with age >= 18
- a drug exposure of [OHDSI Covid19] Amoxicillin<sup>3</sup>
  - with age >= 18

with continuous observation of at least 365 days prior and 0 days after event index date, and limit initial events to: **all events per person.**

#### Inclusion Rules

Inclusion Criteria #1: has both drugs on index

Having all of the following criteria:

- at least 1 occurrences of a drug exposure of Hydroxychloroquine<sup>1</sup> where event starts between 30 days Before and 0 days After index start date
- and at least 1 occurrences of a drug exposure of [OHDSI Covid19] Amoxicillin<sup>3</sup> where event starts between 30 days Before and 0 days After index start date

Inclusion Criteria #2: Prior diagnosis of RA

Having any of the following criteria:

- at least 1 occurrences of a condition occurrence of [OHDSI Cov19] Rheumatoid arthritis<sup>2</sup> where event starts between all days Before and 0 days After index start date
- or at least 1 occurrences of an observation of [OHDSI Cov19] Rheumatoid arthritis<sup>2</sup> where event starts between all days Before and 0 days After index start date

Limit qualifying cohort to: **earliest event per person.**

#### End Date Strategy

##### Custom Drug Era Exit Criteria

This strategy creates a drug era from the codes found in the specified concept set. If the index event is found within an era, the cohort end date will use the era's end date. Otherwise, it will use the observation period end date that contains the index event.

Use the era end date of [OHDSI Covid19] Amoxicillin<sup>3</sup>

- allowing 30 days between exposures
- adding 0 days after exposure end

##### Cohort Collapse Strategy:

Collapse cohort by era with a gap size of 0 days.

## S2.2. Outcomes

All safety outcomes for this study were defined as described in the supplementary appendix to Suchard *et al.* (2019).<sup>1</sup> Below is an abbreviated version of the safety outcome definition process from that publication.

For each outcome, we developed an operational phenotype definition to determine if observational data could support evaluation of the outcome. We used the same approach to design, implement, and evaluate all phenotypes. Specifically, we conducted a PubMed literature review to identify past observational studies that used the phenotype as an outcome, looking especially for studies where source record verification or other validation approaches were applied. In addition, we reviewed eMERGE PheKB phenotype entries (<https://phekb.org/phenotypes>). Clinical guidelines and systematic review of clinical trials of hypertension treatments informed our clinical definitions of cardiovascular outcomes. Where possible, concept sets originated with published code lists (e.g. ICD-9-CM and ICD-10). We augmented these with lexical search and semantic exploration of the OHDSI standardized vocabularies. A clinical adjudicator then reviewed the cohort definitions and associated concept sets. We developed concept definitions using ATLAS, the OHDSI open-source platform (<https://github.com/OHDSI/atlas>). Because the databases used in this study do not all consistently contain laboratory values, diagnosis records alone identified

outcomes. To assess consistency across data sources as well as general clinical reasonableness, we utilized these cohorts to characterize outcome incidence, stratifying by age decile, gender, and index year (in Suchard *et al.* (2019)). We did not perform source record verification or other validation methods.

To view the concept sets and source code lists (e.g. ICD-9-CM, ICD-10-CM) associated with each outcome, navigate to the URL embedded in the phenotype name. Then, navigate to the *Concept Sets* tab. The concept sets used in defining the outcome are listed on this page. After selecting a concept set to view, a user can explore the standard concepts used in the definition or the source codes from which the standard concepts are mapped.

### Safety outcomes of Interest

| Phenotype                                        | Logical description                                                                                                                                                                                                                      | Supporting references                     |
|--------------------------------------------------|------------------------------------------------------------------------------------------------------------------------------------------------------------------------------------------------------------------------------------------|-------------------------------------------|
| <a href="#">All-cause mortality</a>              | Death record of any type                                                                                                                                                                                                                 | 3, 4, 5                                   |
| <a href="#">Cardiovascular-related mortality</a> | Death record with at least 1 cardiovascular-related condition record (myocardial infarction, ischemic stroke, intracranial hemorrhage, sudden cardiac death, hospitalization for heart failure) in 30 days prior to death                | 3                                         |
| <a href="#">Myocardial infarction</a>            | Acute myocardial infarction condition record during an inpatient or ER visit; successive records with > 180-day gap are considered independent episodes                                                                                  | 6, 7, 8, 3, 9, 10                         |
| <a href="#">Chest pain or angina</a>             | The first condition record of chest pain or angina                                                                                                                                                                                       | 11                                        |
| <a href="#">Heart failure</a>                    | The first condition record of heart failure, which is followed by at least 1 heart failure condition record in the following year                                                                                                        | 7, 12, 13, 14, 15, 16, 17, 18, 19, 20, 21 |
| <a href="#">Cardiovascular events</a>            | A condition record of ischemic stroke, hemorrhagic stroke, heart failure, acute myocardial infarction or sudden cardiac death during an inpatient or ER visit; successive records with > 180-day gap are considered independent episodes | 6, 7, 8, 3, 9, 10, 22                     |
| <a href="#">Cardiac arrhythmia</a>               | The first condition record of cardiac arrhythmia, which is followed by another cardiac arrhythmia condition record, at least two drug records for a drug used to treat arrhythmias, or a procedure to treat arrhythmias                  | 22, 23, 24, 25, 26, 27, 28                |
| <a href="#">Bradycardia</a>                      | The first condition record of bradycardia, which is followed by another bradycardia condition record                                                                                                                                     | 29, 30                                    |
| <a href="#">Transient ischemic attack</a>        | Transient ischemic attack condition record during an inpatient or ER visit; successive records with > 30-day gap are considered independent episodes                                                                                     | 31, 32                                    |
| <a href="#">Stroke</a>                           | Stroke (ischemic or hemorrhagic) condition record during an inpatient or ER visit; successive records with > 180-day gap are considered independent episodes                                                                             | 12, 3, 9, 24, 31, 33, 34, 35, 36, 32      |
| <a href="#">Venous thromboembolism</a>           | Venous thromboembolism condition record of any type; successive records with > 180-day gap are considered independent episodes                                                                                                           | 37, 38, 39, 40                            |
| <a href="#">Gastrointestinal bleeding</a>        | Gastrointestinal hemorrhage condition record during an inpatient or ER visit; successive records with > 30-day gap are considered independent episodes                                                                                   | 41, 9, 42, 43, 44, 45, 46                 |
| <a href="#">Acute renal failure</a>              | A diagnosis of acute renal failure in an inpatient or ER setting; must be at least 30d between inpatient/ER visits to be considered separate episodes                                                                                    | 47, 48, 49, 50, 51, 52, 53, 54            |
| <a href="#">End stage renal disease</a>          | End stage renal disease (ESRD) is defined by at least one diagnosis in any setting, followed by at least one additional diagnosis or a dialysis-related procedure within 90 days                                                         | 55, 56, 57                                |
| <a href="#">Hepatic failure</a>                  | The first condition record of hepatic failure, necrosis, or coma                                                                                                                                                                         | 47, 58, 59, 60, 61, 62, 63, 64, 65        |
| <a href="#">Acute pancreatitis</a>               | Acute pancreatitis condition record during an inpatient or ER visit; successive records with >30-day gap are considered independent episodes                                                                                             | 66, 67, 68, 55                            |

### S3. Negative control outcomes

Negative control outcomes are conditions believed to have no causal relationship with hydroxychloroquine, sulfasalazine, azithromycin, or amoxicillin exposure and therefore assumed *a priori* to return a hazard ratio (HR) of 1.0 when their risk is compared between exposure cohorts in a pairwise comparison. A HR of a negative control outcome that differs from 1.0 represents an estimate of the residual error of the analysis that was unaccounted for by the analytic specification such as propensity score adjustment. The distribution of residual error estimates from the negative control outcomes reflects a range of biases inherent to the analysis. The estimates on the negative control outcomes represents the empirical null distribution and we used it to compute hazard ratios and confidence intervals calibrated to reflect the observed residual error of the analysis. The negative controls were selected through a semi-automated process <sup>2</sup> and are listed below with the corresponding SNOMED concept ID.

| Concept ID | Concept Name                            | Concept ID | Concept Name                                       |
|------------|-----------------------------------------|------------|----------------------------------------------------|
| 378256     | Abnormal reflex                         | 435516     | Lipoprotein deficiency disorder                    |
| 4092879    | Absent kidney                           | 438808     | Mammary duct ectasia                               |
| 433753     | Alcohol abuse                           | 441553     | Myoclonus                                          |
| 321689     | Apnea                                   | 4119307    | Neurogenic claudication                            |
| 78200      | Benign mammary dysplasia                | 4209423    | Nicotine dependence                                |
| 4195873    | Breath smells unpleasant                | 438130     | Opioid abuse                                       |
| 443792     | Calculus of bile duct                   | 313601     | Oxygen supply absent                               |
| 434327     | Cannabis abuse                          | 44782778   | Pain disorder with psychological factor            |
| 197318     | Cholesterosis of gallbladder            | 4091513    | Passing flatus                                     |
| 432303     | Cocaine abuse                           | 4022076    | Patient dependence on care provider                |
| 439125     | Complete trisomy 21 syndrome            | 439971     | Poisoning by anticoagulant                         |
| 433270     | Cord entanglement without compression   | 46286594   | Problem related to lifestyle                       |
| 4311591    | Cramp in limb                           | 199876     | Prolapse of female genital organs                  |
| 441267     | Cystic fibrosis                         | 4049367    | Psychologic conversion disorder                    |
| 436233     | Delayed milestone                       | 440068     | Psychosexual dysfunction                           |
| 40486120   | Delay in physiological development      | 436246     | Reduced libido                                     |
| 439791     | Emotional upset                         | 73754      | Restless legs                                      |
| 374801     | Foreign body in ear                     | 4168212    | Restlessness and agitation                         |
| 259995     | Foreign body in orifice                 | 138821     | Seborrhea                                          |
| 196456     | Gallstone                               | 4198492    | Shoulder joint unstable                            |
| 4166231    | Genetic predisposition                  | 25518      | Sickle cell trait                                  |
| 434164     | Glycosuria                              | 4176908    | Snapping thumb syndrome                            |
| 4163735    | Hemochromatosis                         | 4248728    | Snoring                                            |
| 439871     | Hemospermia                             | 138278     | Sprains and strains of joints and adjacent muscles |
| 4058388    | Hypertrophic scar                       | 4008710    | Stenosis due to any device, implant AND/OR graft   |
| 435522     | Hypervitaminosis D                      | 40479573   | Stimulant abuse                                    |
| 443236     | Hypnotic or anxiolytic dependence       | 40483172   | Stimulant dependence                               |
| 4098604    | Hypomagnesemia                          | 440233     | Strain of supraspinatus muscle AND/OR tendon       |
| 435371     | Hypothermia                             | 4194160    | Thyroid function tests abnormal                    |
| 443447     | Iatrogenic hypotension                  | 4216708    | Urgent desire for stool                            |
| 374375     | Impacted cerumen                        | 4275889    | Visual hallucinations                              |
| 4344500    | Impingement syndrome of shoulder region | 4193634    | Worried                                            |
| 440382     | Learning difficulties                   |            |                                                    |

#### S4. Covariate construction

The following consistently extracted set of baseline patient characteristics will be constructed for input in the PS model. From this large set of typically tens of thousands of covariates, key predictors of exposure classification will be selected for inclusion in the PS model. Note that not all data sources necessarily include data for all covariates.

Covariates to be included:

- Demographics (age in 5-year bands, sex, race, ethnicity, index year, index month)
- All conditions occurrence records aggregated to SNOMED clinical finding level during the following lookback windows:
  - in 365 days prior to and including index date
  - in 30 days prior to and including index date
- All drug exposure records aggregated to RxNorm ingredient level and ATC classes during the following lookback windows:
  - in 365 days prior to and including index date
  - in 30 days prior to and including index date
  - persistent exposure that overlaps index date
- All procedure occurrence records during the following lookback windows:
  - in 365 days prior to and including index date
  - in 30 days prior to and including index date
- Measurements (including laboratories) within, above, and below normal range during the following lookback window:
  - in 365 days prior to and including index date
- Device exposure records during the following lookback windows:
  - in 365 days prior to and including index date
  - in 30 days prior to and including index date
- Comorbidity or risk scores including:
  - Charlson
  - DCSI
  - CHADS2
  - CHADS2VAsc



## S5. Exposure cohort counts

The exposure cohort counts are calculated after the following study design criteria have been applied:

- Duplicate patients in the hydroxychloroquine and sulfasalazine with prior RA cohorts are removed from the cohort they qualified for second (i.e. retained in the cohort they qualified for first)
- Duplicate patients in the hydroxychloroquine + azithromycin and hydroxychloroquine + amoxicillin with prior RA cohorts are removed from the cohort they qualified for second (i.e. retained in the cohort they qualified for first)
- Restricted to the calendar time when both exposures in a pairwise comparison (i.e. HCQ vs SSA and HCQ+AZM vs HCQ+AMX) are observed in the database.

After applying these design criteria to the original cohorts, the resulting patients are eligible to contribute data to study diagnostics and potentially to final population-level effect estimates.

| Exposure cohort                                 | Database      | Patients | Exposure cohort                                                | Database      | Patients |
|-------------------------------------------------|---------------|----------|----------------------------------------------------------------|---------------|----------|
| Hydroxychloroquine with prior RA<br>N = 956,374 | AmbEMR        | 57,662   | Hydroxychloroquine + Azithromycin with prior RA<br>N = 323,122 | AmbEMR        | 13,197   |
|                                                 | CCAIE         | 66,756   |                                                                | CCAIE         | 32,693   |
|                                                 | Clinformatics | 51,352   |                                                                | Clinformatics | 23,645   |
|                                                 | CPRD          | 9,129    |                                                                | CPRD          | 115      |
|                                                 | DAGermany     | 3,887    |                                                                | DAGermany     | 89       |
|                                                 | IMRD          | 8,855    |                                                                | IMRD          | 112      |
|                                                 | IPCI          | 1,479    |                                                                | JMDC          | 22       |
|                                                 | JMDC          | 241      |                                                                | IPCI          | 121      |
|                                                 | MDCD          | 8,095    |                                                                | MDCD          | 3,811    |
|                                                 | MDCR          | 15,853   |                                                                | MDCR          | 8,156    |
|                                                 | OpenClaims    | 621,124  |                                                                | OpenClaims    | 216,195  |
|                                                 | OptumEHR      | 78,647   |                                                                | OptumEHR      | 18,592   |
|                                                 | SIDIAP        | 1,247    |                                                                | SIDIAP        | 130      |
| VA                                              | 32,047        | VA       | 6,244                                                          |               |          |
| Sulfasalazine with prior RA<br>N = 310,350      | AmbEMR        | 15,358   | Hydroxychloroquine + Amoxicillin with prior RA<br>N = 351,956  | AmbEMR        | 12,084   |
|                                                 | CCAIE         | 22,407   |                                                                | CCAIE         | 32,591   |
|                                                 | Clinformatics | 17,411   |                                                                | Clinformatics | 24,547   |
|                                                 | CPRD          | 11,401   |                                                                | CPRD          | 5,530    |
|                                                 | DAGermany     | 5,047    |                                                                | DAGermany     | 202      |
|                                                 | IMRD          | 8,463    |                                                                | IMRD          | 5,104    |
|                                                 | IPCI          | 528      |                                                                | JDMC          | 30       |
|                                                 | JMDC          | 2,099    |                                                                | IPCI          | 483      |
|                                                 | MDCD          | 2,200    |                                                                | MDCD          | 3,818    |
|                                                 | MDCR          | 5,193    |                                                                | MDCR          | 9,285    |
|                                                 | OpenClaims    | 183,566  |                                                                | OpenClaims    | 233,107  |
|                                                 | OptumEHR      | 21,944   |                                                                | OptumEHR      | 16,480   |
|                                                 | SIDIAP        | 381      |                                                                | SIDIAP        | 686      |
| VA                                              | 14,352        | VA       | 8,009                                                          |               |          |

\*Note that HCQ+AZM vs HCQ+AMX cohorts in JDMC were of insufficient sample to fit PS models so were not included in the study diagnostics or population-level effect estimation analyses.

**S6. Covariate balance before and after PS stratification****S6.1. HCQ vs SSZ****S6.1.1. AmbEMR**

| Characteristic                           | Before stratification |      |           | After stratification |      |           |
|------------------------------------------|-----------------------|------|-----------|----------------------|------|-----------|
|                                          | HCQ                   | SSZ  |           | HCQ                  | SSZ  |           |
|                                          | %                     | %    | Std. diff | %                    | %    | Std. diff |
| Age group                                |                       |      |           |                      |      |           |
| 15-19                                    | 0.1                   | 0.1  | 0.00      | 0.1                  | 0.1  | 0.00      |
| 20-24                                    | 0.7                   | 0.6  | 0.01      | 0.7                  | 0.6  | 0.01      |
| 25-29                                    | 1.3                   | 1.4  | -0.01     | 1.3                  | 1.4  | 0.00      |
| 30-34                                    | 2.4                   | 2.2  | 0.02      | 2.3                  | 2.3  | 0.00      |
| 35-39                                    | 3.5                   | 3.7  | -0.01     | 3.5                  | 3.4  | 0.01      |
| 40-44                                    | 5.4                   | 5.0  | 0.02      | 5.3                  | 5.1  | 0.01      |
| 45-49                                    | 7.4                   | 7.0  | 0.02      | 7.4                  | 7.5  | 0.00      |
| 50-54                                    | 10.4                  | 11.0 | -0.02     | 10.5                 | 10.5 | 0.00      |
| 55-59                                    | 13.1                  | 13.4 | -0.01     | 13.2                 | 12.9 | 0.01      |
| 60-64                                    | 13.8                  | 14.4 | -0.02     | 13.9                 | 14.1 | 0.00      |
| 65-69                                    | 13.7                  | 14.2 | -0.01     | 13.8                 | 13.7 | 0.00      |
| 70-74                                    | 13.1                  | 13.3 | -0.01     | 13.1                 | 13.9 | -0.02     |
| 75-79                                    | 11.2                  | 9.8  | 0.05      | 10.9                 | 11.0 | 0.00      |
| 80-84                                    | 3.9                   | 3.9  | 0.00      | 3.9                  | 3.7  | 0.01      |
| Gender: female                           | 79.7                  | 74.1 | 0.13      | 78.3                 | 78.4 | 0.00      |
| Race                                     |                       |      |           |                      |      |           |
| race = Asian                             | 1.4                   | 1.5  | -0.02     | 1.4                  | 1.3  | 0.00      |
| race = White                             | 70.9                  | 71.7 | -0.02     | 71.1                 | 71.3 | 0.00      |
| race = African American                  | 8.0                   | 7.8  | 0.01      | 8.0                  | 7.7  | 0.01      |
| Ethnicity                                |                       |      |           |                      |      |           |
| ethnicity = Hispanic or Latino           | 1.3                   | 1.8  | -0.04     | 1.4                  | 1.5  | -0.01     |
| ethnicity = Not Hispanic or Latino       | 80.3                  | 81.0 | -0.02     | 80.5                 | 80.3 | 0.00      |
| Medical history: General                 |                       |      |           |                      |      |           |
| Acute respiratory disease                | 13.5                  | 14.2 | -0.02     | 13.7                 | 13.8 | 0.00      |
| Attention deficit hyperactivity disorder | 0.6                   | 0.4  | 0.02      | 0.6                  | 0.5  | 0.01      |
| Chronic liver disease                    | 1.5                   | 1.5  | 0.00      | 1.5                  | 1.4  | 0.01      |
| Chronic obstructive lung disease         | 7.0                   | 7.2  | -0.01     | 7.1                  | 6.9  | 0.01      |
| Crohn's disease                          | 0.4                   | 1.1  | -0.08     | 0.5                  | 0.6  | -0.02     |
| Dementia                                 | 0.6                   | 0.5  | 0.02      | 0.6                  | 0.6  | 0.00      |
| Diabetes mellitus                        | 13.2                  | 13.2 | 0.00      | 13.2                 | 13.7 | -0.02     |
| Gastroesophageal reflux disease          | 15.9                  | 14.6 | 0.04      | 15.6                 | 15.7 | 0.00      |
| Gastrointestinal hemorrhage              | 1.2                   | 1.2  | 0.00      | 1.2                  | 1.2  | 0.00      |
| Human immunodeficiency virus infection   | 0.1                   | 0.1  | 0.00      | 0.1                  | 0.1  | 0.00      |
| Hyperlipidemia                           | 29.0                  | 28.1 | 0.02      | 28.8                 | 29.1 | -0.01     |
| Hypertensive disorder                    | 38.0                  | 37.1 | 0.02      | 37.8                 | 38.2 | -0.01     |
| Lesion of liver                          | 0.9                   | 0.8  | 0.01      | 0.9                  | 0.8  | 0.01      |
| Obesity                                  | 8.9                   | 8.9  | 0.00      | 8.9                  | 9.0  | 0.00      |
| Osteoarthritis                           | 25.5                  | 27.1 | -0.04     | 25.8                 | 25.2 | 0.01      |
| Pneumonia                                | 3.1                   | 3.4  | -0.01     | 3.2                  | 3.1  | 0.01      |
| Psoriasis                                | 1.5                   | 3.2  | -0.11     | 1.7                  | 2.0  | -0.02     |
| Renal impairment                         | 5.3                   | 4.8  | 0.02      | 5.2                  | 5.3  | -0.01     |
| Rheumatoid arthritis                     | 84.0                  | 82.2 | 0.05      | 83.6                 | 84.4 | -0.02     |
| Ulcerative colitis                       | 0.3                   | 1.2  | -0.10     | 0.4                  | 0.6  | -0.03     |
| Urinary tract infectious disease         | 6.0                   | 5.2  | 0.04      | 5.8                  | 5.5  | 0.01      |
| Viral hepatitis C                        | 1.0                   | 1.0  | 0.00      | 1.0                  | 0.9  | 0.01      |
| Visual system disorder                   | 8.6                   | 8.8  | 0.00      | 8.6                  | 8.5  | 0.00      |
| Medical history: Cardiovascular disease  |                       |      |           |                      |      |           |
| Atrial fibrillation                      | 3.3                   | 3.1  | 0.01      | 3.2                  | 3.2  | 0.00      |
| Cerebrovascular disease                  | 3.1                   | 2.8  | 0.02      | 3.1                  | 3.1  | 0.00      |
| Coronary arteriosclerosis                | 5.7                   | 5.6  | 0.00      | 5.7                  | 5.6  | 0.00      |
| Heart disease                            | 15.9                  | 14.6 | 0.04      | 15.6                 | 15.6 | 0.00      |
| Heart failure                            | 2.6                   | 2.3  | 0.02      | 2.6                  | 2.4  | 0.01      |
| Ischemic heart disease                   | 1.7                   | 1.6  | 0.01      | 1.7                  | 1.5  | 0.02      |

Risk of hydroxychloroquine with azithromycin

| Characteristic                                        | Before stratification |      |           | After stratification |      |           |
|-------------------------------------------------------|-----------------------|------|-----------|----------------------|------|-----------|
|                                                       | HCQ                   | SSZ  |           | HCQ                  | SSZ  |           |
|                                                       | %                     | %    | Std. diff | %                    | %    | Std. diff |
| Pulmonary embolism                                    | 0.8                   | 0.7  | 0.01      | 0.8                  | 0.7  | 0.01      |
| Venous thrombosis                                     | 1.3                   | 1.2  | 0.01      | 1.3                  | 1.4  | -0.01     |
| Medical history: Neoplasms                            |                       |      |           |                      |      |           |
| Hematologic neoplasm                                  | 0.4                   | 0.3  | 0.02      | 0.4                  | 0.4  | 0.01      |
| Malignant lymphoma                                    | 0.4                   | 0.5  | -0.01     | 0.4                  | 0.6  | -0.03     |
| Malignant neoplasm of anorectum                       | 0.1                   | 0.1  | -0.01     | 0.1                  | 0.1  | 0.00      |
| Malignant neoplastic disease                          | 6.9                   | 6.6  | 0.01      | 6.8                  | 7.0  | -0.01     |
| Malignant tumor of breast                             | 1.5                   | 1.4  | 0.01      | 1.4                  | 1.6  | -0.01     |
| Malignant tumor of colon                              | 0.3                   | 0.3  | 0.00      | 0.3                  | 0.3  | -0.01     |
| Malignant tumor of lung                               | 0.3                   | 0.4  | -0.02     | 0.3                  | 0.3  | -0.01     |
| Malignant tumor of urinary bladder                    | 0.2                   | 0.3  | -0.01     | 0.2                  | 0.2  | 0.00      |
| Primary malignant neoplasm of prostate                | 0.4                   | 0.3  | 0.00      | 0.4                  | 0.3  | 0.01      |
| Medication use                                        |                       |      |           |                      |      |           |
| Agents acting on the renin-angiotensin system         | 33.2                  | 33.6 | -0.01     | 33.3                 | 33.6 | -0.01     |
| Antibacterials for systemic use                       | 24.7                  | 25.3 | -0.01     | 24.9                 | 24.5 | 0.01      |
| Antidepressants                                       | 36.1                  | 34.9 | 0.02      | 35.7                 | 35.7 | 0.00      |
| Antiepileptics                                        | 24.0                  | 24.1 | 0.00      | 24.0                 | 24.0 | 0.00      |
| Antiinflammatory and antirheumatic products           | 42.8                  | 44.4 | -0.03     | 43.1                 | 43.4 | 0.00      |
| Antineoplastic agents                                 | 35.9                  | 41.4 | -0.11     | 37.3                 | 37.8 | -0.01     |
| Antipsoriatics                                        | 0.6                   | 0.7  | 0.00      | 0.6                  | 0.7  | 0.00      |
| Antithrombotic agents                                 | 25.2                  | 23.5 | 0.04      | 24.9                 | 25.2 | -0.01     |
| Beta blocking agents                                  | 25.2                  | 25.1 | 0.00      | 25.2                 | 25.8 | -0.02     |
| Calcium channel blockers                              | 17.5                  | 17.7 | 0.00      | 17.5                 | 17.7 | 0.00      |
| Diuretics                                             | 30.6                  | 30.0 | 0.01      | 30.5                 | 31.2 | -0.01     |
| Drugs for obstructive airway diseases                 | 30.9                  | 30.0 | 0.02      | 30.8                 | 31.0 | 0.00      |
| Drugs used in diabetes                                | 14.2                  | 14.3 | 0.00      | 14.3                 | 14.8 | -0.01     |
| Immunosuppressants                                    | 49.4                  | 61.2 | -0.24     | 52.2                 | 52.1 | 0.00      |
| Lipid modifying agents                                | 33.2                  | 33.7 | -0.01     | 33.3                 | 33.5 | 0.00      |
| Opioids                                               | 28.4                  | 30.7 | -0.05     | 28.9                 | 28.8 | 0.00      |
| Psycholeptics                                         | 26.3                  | 25.6 | 0.02      | 26.1                 | 26.1 | 0.00      |
| Psychostimulants, agents used for adhd and nootropics | 4.0                   | 3.8  | 0.01      | 4.0                  | 4.0  | 0.00      |

## S6.1.2. CCAE

| Characteristic                                | Before stratification |      |           | After stratification |      |           |
|-----------------------------------------------|-----------------------|------|-----------|----------------------|------|-----------|
|                                               | HCQ                   | SSZ  |           | HCQ                  | SSZ  |           |
|                                               | %                     | %    | Std. diff | %                    | %    | Std. diff |
| Age group                                     |                       |      |           |                      |      |           |
| 20-24                                         | 1.9                   | 1.9  | 0.00      | 1.8                  | 2.0  | -0.01     |
| 25-29                                         | 2.6                   | 2.6  | 0.00      | 2.5                  | 2.7  | -0.01     |
| 30-34                                         | 4.5                   | 4.6  | 0.00      | 4.5                  | 4.4  | 0.00      |
| 40-44                                         | 9.8                   | 9.5  | 0.01      | 9.7                  | 9.5  | 0.01      |
| 45-49                                         | 13.7                  | 12.9 | 0.02      | 13.6                 | 13.4 | 0.00      |
| 50-54                                         | 18.2                  | 18.1 | 0.00      | 18.2                 | 18.0 | 0.01      |
| 55-59                                         | 20.6                  | 21.0 | -0.01     | 20.8                 | 20.8 | 0.00      |
| 60-64                                         | 19.0                  | 19.8 | -0.02     | 19.4                 | 19.8 | -0.01     |
| 65-69                                         | 1.8                   | 1.7  | 0.00      | 1.8                  | 1.6  | 0.01      |
| Gender: female                                | 82.0                  | 74.3 | 0.19      | 80.1                 | 79.7 | 0.01      |
| Medical history: General                      |                       |      |           |                      |      |           |
| Acute respiratory disease                     | 35.5                  | 34.4 | 0.02      | 35.1                 | 34.8 | 0.01      |
| Chronic liver disease                         | 3.2                   | 3.2  | 0.00      | 3.2                  | 3.3  | 0.00      |
| Chronic obstructive lung disease              | 4.2                   | 4.5  | -0.01     | 4.3                  | 4.5  | -0.01     |
| Crohn's disease                               | 0.6                   | 1.8  | -0.12     | 0.7                  | 1.1  | -0.04     |
| Dementia                                      | 0.2                   | 0.2  | 0.01      | 0.2                  | 0.2  | 0.00      |
| Depressive disorder                           | 13.4                  | 13.5 | 0.00      | 13.3                 | 13.5 | 0.00      |
| Diabetes mellitus                             | 13.5                  | 13.4 | 0.00      | 13.6                 | 13.8 | -0.01     |
| Gastroesophageal reflux disease               | 13.7                  | 13.5 | 0.01      | 13.6                 | 13.5 | 0.00      |
| Gastrointestinal hemorrhage                   | 2.9                   | 3.4  | -0.03     | 3.0                  | 3.2  | -0.01     |
| Human immunodeficiency virus infection        | 0.1                   | 0.2  | -0.01     | 0.1                  | 0.1  | 0.00      |
| Hyperlipidemia                                | 31.5                  | 30.5 | 0.02      | 31.2                 | 31.4 | 0.00      |
| Hypertensive disorder                         | 34.7                  | 34.9 | 0.00      | 34.8                 | 35.0 | 0.00      |
| Lesion of liver                               | 0.9                   | 0.8  | 0.01      | 0.9                  | 0.8  | 0.00      |
| Obesity                                       | 9.3                   | 9.1  | 0.00      | 9.2                  | 9.5  | -0.01     |
| Osteoarthritis                                | 43.4                  | 44.4 | -0.02     | 43.5                 | 44.2 | -0.01     |
| Pneumonia                                     | 4.0                   | 3.9  | 0.00      | 4.0                  | 4.0  | 0.00      |
| Psoriasis                                     | 3.0                   | 8.9  | -0.25     | 3.8                  | 5.2  | -0.07     |
| Renal impairment                              | 3.1                   | 2.8  | 0.02      | 3.0                  | 2.8  | 0.01      |
| Rheumatoid arthritis                          | 84.2                  | 85.7 | -0.04     | 84.9                 | 85.3 | -0.01     |
| Schizophrenia                                 | 0.1                   | 0.1  | -0.01     | 0.1                  | 0.1  | -0.01     |
| Ulcerative colitis                            | 0.6                   | 1.9  | -0.12     | 0.7                  | 1.0  | -0.04     |
| Urinary tract infectious disease              | 11.9                  | 10.8 | 0.03      | 11.6                 | 11.5 | 0.00      |
| Viral hepatitis C                             | 1.1                   | 1.0  | 0.01      | 1.1                  | 1.0  | 0.01      |
| Visual system disorder                        | 25.7                  | 26.2 | -0.01     | 25.7                 | 25.9 | 0.00      |
| Medical history: Cardiovascular disease       |                       |      |           |                      |      |           |
| Atrial fibrillation                           | 1.4                   | 1.3  | 0.02      | 1.4                  | 1.3  | 0.01      |
| Cerebrovascular disease                       | 2.8                   | 2.6  | 0.01      | 2.8                  | 2.9  | -0.01     |
| Heart disease                                 | 15.7                  | 15.0 | 0.02      | 15.5                 | 15.4 | 0.00      |
| Heart failure                                 | 1.9                   | 2.0  | 0.00      | 1.9                  | 2.0  | 0.00      |
| Ischemic heart disease                        | 2.9                   | 3.1  | -0.01     | 3.0                  | 3.1  | -0.01     |
| Peripheral vascular disease                   | 1.6                   | 1.5  | 0.01      | 1.5                  | 1.6  | -0.01     |
| Pulmonary embolism                            | 0.8                   | 0.5  | 0.03      | 0.8                  | 0.6  | 0.02      |
| Medical history: Neoplasms                    |                       |      |           |                      |      |           |
| Hematologic neoplasm                          | 1.0                   | 1.0  | 0.00      | 1.0                  | 1.0  | 0.00      |
| Malignant lymphoma                            | 0.5                   | 0.5  | 0.00      | 0.5                  | 0.4  | 0.02      |
| Malignant neoplasm of anorectum               | 0.1                   | 0.1  | 0.00      | 0.1                  | 0.1  | 0.00      |
| Malignant tumor of breast                     | 1.8                   | 1.6  | 0.02      | 1.7                  | 1.7  | 0.00      |
| Malignant tumor of colon                      | 0.2                   | 0.2  | 0.00      | 0.2                  | 0.2  | 0.00      |
| Malignant tumor of lung                       | 0.1                   | 0.2  | -0.01     | 0.2                  | 0.1  | 0.00      |
| Primary malignant neoplasm of prostate        | 0.4                   | 0.4  | -0.01     | 0.4                  | 0.4  | 0.00      |
| Medication use                                |                       |      |           |                      |      |           |
| Agents acting on the renin-angiotensin system | 24.3                  | 24.9 | -0.01     | 24.5                 | 24.6 | 0.00      |
| Antibacterials for systemic use               | 43.8                  | 44.3 | -0.01     | 43.8                 | 44.0 | 0.00      |
| Antidepressants                               | 36.4                  | 36.5 | 0.00      | 36.3                 | 36.5 | 0.00      |
| Antiepileptics                                | 20.3                  | 21.0 | -0.02     | 20.4                 | 20.2 | 0.00      |

## Risk of hydroxychloroquine with azithromycin

| Characteristic                                        | Before stratification |      |           | After stratification |      |           |
|-------------------------------------------------------|-----------------------|------|-----------|----------------------|------|-----------|
|                                                       | HCQ                   | SSZ  |           | HCQ                  | SSZ  |           |
|                                                       | %                     | %    | Std. diff | %                    | %    | Std. diff |
| Antiinflammatory and antirheumatic products           | 55.3                  | 57.4 | -0.04     | 55.8                 | 56.7 | -0.02     |
| Antineoplastic agents                                 | 30.7                  | 37.8 | -0.15     | 33.0                 | 33.1 | 0.00      |
| Antipsoriatics                                        | 0.7                   | 1.2  | -0.06     | 0.7                  | 1.0  | -0.03     |
| Antithrombotic agents                                 | 7.4                   | 7.3  | 0.01      | 7.4                  | 7.3  | 0.00      |
| Beta blocking agents                                  | 15.8                  | 16.2 | -0.01     | 15.9                 | 16.2 | -0.01     |
| Calcium channel blockers                              | 11.7                  | 11.5 | 0.01      | 11.7                 | 11.8 | 0.00      |
| Drugs for acid related disorders                      | 32.3                  | 33.6 | -0.03     | 32.6                 | 32.6 | 0.00      |
| Drugs for obstructive airway diseases                 | 29.7                  | 29.3 | 0.01      | 29.5                 | 29.5 | 0.00      |
| Drugs used in diabetes                                | 10.4                  | 10.5 | 0.00      | 10.5                 | 10.8 | -0.01     |
| Immunosuppressants                                    | 39.6                  | 53.0 | -0.27     | 43.4                 | 43.6 | 0.00      |
| Lipid modifying agents                                | 22.6                  | 23.5 | -0.02     | 22.8                 | 23.2 | -0.01     |
| Opioids                                               | 38.5                  | 40.7 | -0.05     | 39.0                 | 39.3 | -0.01     |
| Psycholeptics                                         | 33.6                  | 33.7 | 0.00      | 33.4                 | 33.3 | 0.00      |
| Psychostimulants, agents used for adhd and nootropics | 5.9                   | 5.6  | 0.01      | 5.8                  | 5.7  | 0.01      |

## S6.1.3. CPRD

| Characteristic                                | Before stratification |      |           | After stratification |      |           |
|-----------------------------------------------|-----------------------|------|-----------|----------------------|------|-----------|
|                                               | HCQ                   | SSZ  |           | HCQ                  | SSZ  |           |
|                                               | %                     | %    | Std. diff | %                    | %    | Std. diff |
| Age group                                     |                       |      |           |                      |      |           |
| 15-19                                         | 0.3                   | 0.2  | 0.01      | 0.3                  | 0.2  | 0.00      |
| 20-24                                         | 0.8                   | 1.0  | -0.02     | 0.9                  | 0.9  | -0.01     |
| 25-29                                         | 1.2                   | 1.7  | -0.04     | 1.4                  | 1.6  | -0.02     |
| 30-34                                         | 2.7                   | 3.1  | -0.02     | 3.0                  | 3.0  | 0.00      |
| 35-39                                         | 4.6                   | 4.6  | 0.00      | 4.7                  | 4.6  | 0.01      |
| 40-44                                         | 5.6                   | 6.6  | -0.04     | 6.2                  | 6.4  | 0.00      |
| 45-49                                         | 8.9                   | 8.1  | 0.03      | 8.6                  | 8.5  | 0.00      |
| 50-54                                         | 11.4                  | 10.8 | 0.02      | 11.2                 | 10.9 | 0.01      |
| 55-59                                         | 13.2                  | 12.6 | 0.02      | 13.4                 | 12.8 | 0.02      |
| 60-64                                         | 13.1                  | 13.2 | 0.00      | 12.8                 | 13.0 | -0.01     |
| 65-69                                         | 12.6                  | 12.7 | 0.00      | 12.6                 | 12.7 | 0.00      |
| 70-74                                         | 10.8                  | 11.6 | -0.02     | 11.2                 | 11.2 | 0.00      |
| 80-84                                         | 4.5                   | 4.3  | 0.01      | 4.2                  | 4.4  | -0.01     |
| 85-89                                         | 1.6                   | 1.3  | 0.03      | 1.3                  | 1.4  | -0.01     |
| 90-94                                         | 0.3                   | 0.2  | 0.03      | 0.3                  | 0.2  | 0.03      |
| Medical history: General                      |                       |      |           |                      |      |           |
| Acute respiratory disease                     | 9.2                   | 9.1  | 0.00      | 9.4                  | 9.3  | 0.01      |
| Chronic obstructive lung disease              | 2.3                   | 2.0  | 0.02      | 2.2                  | 2.0  | 0.01      |
| Crohn's disease                               | <0.1                  | 0.1  | -0.03     | 0.1                  | 0.1  | -0.01     |
| Depressive disorder                           | 2.7                   | 3.2  | -0.03     | 3.0                  | 3.1  | 0.00      |
| Diabetes mellitus                             | 2.2                   | 2.1  | 0.01      | 2.1                  | 2.2  | -0.01     |
| Gastroesophageal reflux disease               | 0.5                   | 0.4  | 0.02      | 0.4                  | 0.4  | 0.00      |
| Gastrointestinal hemorrhage                   | 1.0                   | 1.4  | -0.04     | 1.2                  | 1.4  | -0.02     |
| Hyperlipidemia                                | 1.2                   | 1.0  | 0.02      | 1.2                  | 1.0  | 0.01      |
| Hypertensive disorder                         | 3.0                   | 3.9  | -0.05     | 3.2                  | 3.6  | -0.02     |
| Lesion of liver                               | 0.1                   | 0.1  | 0.01      | 0.1                  | 0.1  | 0.01      |
| Obesity                                       | 0.4                   | 0.5  | -0.01     | 0.4                  | 0.5  | -0.01     |
| Osteoarthritis                                | 7.6                   | 10.4 | -0.10     | 8.6                  | 8.9  | -0.01     |
| Pneumonia                                     | 0.8                   | 0.6  | 0.03      | 0.9                  | 0.6  | 0.03      |
| Psoriasis                                     | 0.7                   | 1.9  | -0.10     | 1.2                  | 1.5  | -0.03     |
| Renal impairment                              | 2.3                   | 1.8  | 0.03      | 1.9                  | 2.2  | -0.02     |
| Rheumatoid arthritis                          | 61.3                  | 72.3 | -0.24     | 67.4                 | 66.3 | 0.02      |
| Visual system disorder                        | 7.0                   | 6.9  | 0.00      | 6.7                  | 6.9  | -0.01     |
| Medical history: Cardiovascular disease       |                       |      |           |                      |      |           |
| Atrial fibrillation                           | 0.7                   | 0.7  | 0.00      | 0.8                  | 0.7  | 0.02      |
| Cerebrovascular disease                       | 0.4                   | 0.8  | -0.05     | 0.5                  | 0.7  | -0.03     |
| Coronary arteriosclerosis                     | 0.1                   | 0.1  | 0.00      | 0.1                  | 0.1  | 0.00      |
| Heart disease                                 | 3.0                   | 3.4  | -0.02     | 3.4                  | 3.1  | 0.01      |
| Heart failure                                 | 0.5                   | 0.7  | -0.02     | 0.7                  | 0.6  | 0.01      |
| Ischemic heart disease                        | 1.0                   | 1.5  | -0.04     | 1.2                  | 1.3  | -0.01     |
| Peripheral vascular disease                   | 0.2                   | 0.2  | 0.01      | 0.3                  | 0.2  | 0.02      |
| Pulmonary embolism                            | 0.2                   | 0.2  | -0.01     | 0.2                  | 0.2  | -0.02     |
| Venous thrombosis                             | 0.8                   | 1.0  | -0.01     | 0.9                  | 1.0  | 0.00      |
| Medical history: Neoplasms                    |                       |      |           |                      |      |           |
| Malignant neoplastic disease                  | 1.3                   | 1.0  | 0.02      | 1.1                  | 1.0  | 0.01      |
| Malignant tumor of breast                     | 0.1                   | 0.1  | 0.00      | 0.1                  | 0.1  | -0.01     |
| Medication use                                |                       |      |           |                      |      |           |
| Agents acting on the renin-angiotensin system | 22.0                  | 16.8 | 0.13      | 19.4                 | 19.4 | 0.00      |
| Antibacterials for systemic use               | 37.3                  | 35.0 | 0.05      | 35.7                 | 36.2 | -0.01     |
| Antidepressants                               | 26.6                  | 22.6 | 0.09      | 25.0                 | 24.9 | 0.00      |
| Antiepileptics                                | 6.5                   | 4.3  | 0.10      | 5.4                  | 5.2  | 0.01      |
| Antiinflammatory and antirheumatic products   | 60.5                  | 67.7 | -0.15     | 64.3                 | 63.8 | 0.01      |
| Antineoplastic agents                         | 51.4                  | 28.6 | 0.48      | 39.3                 | 40.8 | -0.03     |
| Antipsoriatics                                | 0.7                   | 1.3  | -0.06     | 0.9                  | 1.2  | -0.02     |
| Antithrombotic agents                         | 17.9                  | 16.7 | 0.03      | 17.3                 | 17.2 | 0.00      |
| Beta blocking agents                          | 14.4                  | 13.5 | 0.03      | 14.4                 | 13.9 | 0.02      |

Risk of hydroxychloroquine with azithromycin

| Characteristic                                        | Before stratification |      |           | After stratification |      |           |
|-------------------------------------------------------|-----------------------|------|-----------|----------------------|------|-----------|
|                                                       | HCQ                   | SSZ  |           | HCQ                  | SSZ  |           |
|                                                       | %                     | %    | Std. diff | %                    | %    | Std. diff |
| Calcium channel blockers                              | 15.5                  | 12.1 | 0.10      | 13.4                 | 13.6 | 0.00      |
| Diuretics                                             | 19.0                  | 20.9 | -0.05     | 20.0                 | 20.1 | 0.00      |
| Drugs for acid related disorders                      | 58.3                  | 51.0 | 0.15      | 54.1                 | 54.6 | -0.01     |
| Drugs used in diabetes                                | 7.1                   | 5.8  | 0.05      | 6.2                  | 6.6  | -0.02     |
| Immunosuppressants                                    | 55.2                  | 30.0 | 0.53      | 42.2                 | 43.0 | -0.02     |
| Lipid modifying agents                                | 23.0                  | 17.1 | 0.15      | 19.5                 | 19.8 | -0.01     |
| Opioids                                               | 36.3                  | 41.1 | -0.10     | 39.0                 | 38.9 | 0.00      |
| Psycholeptics                                         | 16.5                  | 16.4 | 0.00      | 16.7                 | 16.5 | 0.00      |
| Psychostimulants, agents used for adhd and nootropics | 0.1                   | 0.1  | 0.01      | 0.1                  | 0.1  | 0.01      |

## S6.1.4. Clinformatics

| Characteristic                           | Before stratification |      |           | After stratification |      |           |
|------------------------------------------|-----------------------|------|-----------|----------------------|------|-----------|
|                                          | HCQ                   | SSZ  |           | HCQ                  | SSZ  |           |
|                                          | %                     | %    | Std. diff | %                    | %    | Std. diff |
| Age group                                |                       |      |           |                      |      |           |
| 15-19                                    | 0.3                   | 0.4  | -0.01     | 0.3                  | 0.4  | -0.02     |
| 20-24                                    | 1.1                   | 1.1  | -0.01     | 1.1                  | 1.1  | -0.01     |
| 25-29                                    | 1.8                   | 2.0  | -0.01     | 1.8                  | 1.8  | 0.00      |
| 30-34                                    | 3.4                   | 3.2  | 0.01      | 3.3                  | 3.3  | 0.00      |
| 35-39                                    | 4.9                   | 5.2  | -0.02     | 4.9                  | 4.8  | 0.00      |
| 40-44                                    | 6.8                   | 6.7  | 0.01      | 6.8                  | 6.5  | 0.01      |
| 45-49                                    | 8.9                   | 9.1  | 0.00      | 8.9                  | 8.9  | 0.00      |
| 50-54                                    | 11.6                  | 11.6 | 0.00      | 11.6                 | 11.7 | 0.00      |
| 55-59                                    | 12.5                  | 13.3 | -0.02     | 12.7                 | 12.8 | 0.00      |
| 60-64                                    | 11.6                  | 12.6 | -0.03     | 11.9                 | 11.9 | 0.00      |
| 65-69                                    | 11.3                  | 12.2 | -0.03     | 11.6                 | 11.7 | 0.00      |
| 70-74                                    | 10.8                  | 10.6 | 0.01      | 10.9                 | 10.6 | 0.01      |
| 75-79                                    | 7.9                   | 6.9  | 0.04      | 7.7                  | 7.7  | 0.00      |
| 80-84                                    | 5.0                   | 3.8  | 0.06      | 4.7                  | 4.9  | -0.01     |
| 85-89                                    | 1.9                   | 1.3  | 0.05      | 1.8                  | 1.7  | 0.01      |
| Gender: female                           | 79.6                  | 71.9 | 0.18      | 77.6                 | 77.6 | 0.00      |
| Medical history: General                 |                       |      |           |                      |      |           |
| Acute respiratory disease                | 34.7                  | 33.2 | 0.03      | 34.2                 | 34.2 | 0.00      |
| Attention deficit hyperactivity disorder | 1.2                   | 1.1  | 0.00      | 1.2                  | 1.1  | 0.00      |
| Chronic liver disease                    | 3.7                   | 3.8  | -0.01     | 3.7                  | 3.9  | -0.01     |
| Chronic obstructive lung disease         | 11.2                  | 10.9 | 0.01      | 11.1                 | 11.2 | 0.00      |
| Crohn's disease                          | 0.7                   | 2.4  | -0.14     | 0.9                  | 1.4  | -0.05     |
| Dementia                                 | 1.3                   | 1.2  | 0.01      | 1.2                  | 1.5  | -0.02     |
| Depressive disorder                      | 18.5                  | 18.1 | 0.01      | 18.4                 | 18.2 | 0.00      |
| Diabetes mellitus                        | 20.9                  | 20.2 | 0.02      | 20.7                 | 21.1 | -0.01     |
| Gastroesophageal reflux disease          | 21.6                  | 21.1 | 0.01      | 21.5                 | 21.8 | -0.01     |
| Gastrointestinal hemorrhage              | 4.0                   | 4.5  | -0.02     | 4.0                  | 4.1  | 0.00      |
| Human immunodeficiency virus infection   | 0.2                   | 0.2  | -0.01     | 0.2                  | 0.2  | -0.01     |
| Hyperlipidemia                           | 46.8                  | 45.3 | 0.03      | 46.4                 | 47.1 | -0.01     |
| Hypertensive disorder                    | 51.4                  | 51.0 | 0.01      | 51.2                 | 51.9 | -0.01     |
| Lesion of liver                          | 1.3                   | 1.2  | 0.00      | 1.3                  | 1.3  | 0.00      |
| Obesity                                  | 12.2                  | 12.5 | -0.01     | 12.2                 | 12.2 | 0.00      |
| Osteoarthritis                           | 56.4                  | 55.4 | 0.02      | 56.1                 | 56.7 | -0.01     |
| Pneumonia                                | 6.5                   | 5.8  | 0.03      | 6.3                  | 6.4  | 0.00      |
| Psoriasis                                | 3.2                   | 8.0  | -0.21     | 3.9                  | 4.9  | -0.05     |
| Renal impairment                         | 9.9                   | 9.2  | 0.03      | 9.7                  | 9.9  | 0.00      |
| Rheumatoid arthritis                     | 84.3                  | 85.5 | -0.04     | 84.8                 | 85.2 | -0.01     |
| Schizophrenia                            | 0.2                   | 0.1  | 0.01      | 0.2                  | 0.1  | 0.01      |
| Ulcerative colitis                       | 0.7                   | 2.2  | -0.13     | 0.9                  | 1.3  | -0.04     |
| Viral hepatitis C                        | 1.5                   | 1.7  | -0.02     | 1.5                  | 1.7  | -0.02     |
| Visual system disorder                   | 40.3                  | 39.7 | 0.01      | 40.0                 | 39.8 | 0.00      |
| Medical history: Cardiovascular disease  |                       |      |           |                      |      |           |
| Atrial fibrillation                      | 5.1                   | 4.1  | 0.04      | 4.8                  | 4.8  | 0.00      |
| Cerebrovascular disease                  | 6.3                   | 5.5  | 0.03      | 6.1                  | 6.0  | 0.00      |
| Coronary arteriosclerosis                | 10.8                  | 10.5 | 0.01      | 10.7                 | 11.0 | -0.01     |
| Heart disease                            | 27.8                  | 26.1 | 0.04      | 27.3                 | 27.9 | -0.01     |
| Heart failure                            | 6.3                   | 5.8  | 0.02      | 6.1                  | 6.4  | -0.01     |
| Ischemic heart disease                   | 6.5                   | 6.4  | 0.01      | 6.5                  | 6.6  | -0.01     |
| Peripheral vascular disease              | 4.7                   | 4.3  | 0.02      | 4.7                  | 4.6  | 0.00      |
| Pulmonary embolism                       | 1.2                   | 0.9  | 0.03      | 1.2                  | 1.1  | 0.01      |
| Venous thrombosis                        | 2.3                   | 2.1  | 0.02      | 2.2                  | 2.4  | -0.01     |
| Medical history: Neoplasms               |                       |      |           |                      |      |           |
| Hematologic neoplasm                     | 1.4                   | 1.2  | 0.02      | 1.4                  | 1.3  | 0.01      |
| Malignant lymphoma                       | 0.7                   | 0.8  | -0.01     | 0.7                  | 0.8  | -0.01     |
| Malignant neoplasm of anorectum          | 0.2                   | 0.3  | -0.02     | 0.2                  | 0.2  | -0.02     |
| Malignant neoplastic disease             | 10.4                  | 10.4 | 0.00      | 10.4                 | 10.6 | -0.01     |



Risk of hydroxychloroquine with azithromycin

| Characteristic                                        | Before stratification |      |           | After stratification |      |           |
|-------------------------------------------------------|-----------------------|------|-----------|----------------------|------|-----------|
|                                                       | HCQ                   | SSZ  |           | HCQ                  | SSZ  |           |
|                                                       | %                     | %    | Std. diff | %                    | %    | Std. diff |
| Malignant tumor of breast                             | 2.5                   | 2.0  | 0.04      | 2.4                  | 2.4  | 0.00      |
| Malignant tumor of colon                              | 0.4                   | 0.5  | -0.01     | 0.4                  | 0.5  | -0.01     |
| Malignant tumor of lung                               | 0.4                   | 0.4  | 0.01      | 0.4                  | 0.4  | 0.01      |
| Malignant tumor of urinary bladder                    | 0.3                   | 0.4  | -0.01     | 0.3                  | 0.3  | 0.00      |
| Primary malignant neoplasm of prostate                | 1.0                   | 1.2  | -0.02     | 1.0                  | 1.0  | 0.00      |
| Medication use                                        |                       |      |           |                      |      |           |
| Agents acting on the renin-angiotensin system         | 32.3                  | 32.6 | -0.01     | 32.4                 | 32.7 | -0.01     |
| Antibacterials for systemic use                       | 41.2                  | 41.9 | -0.01     | 41.3                 | 41.1 | 0.00      |
| Antidepressants                                       | 35.1                  | 35.2 | 0.00      | 35.0                 | 34.9 | 0.00      |
| Antiinflammatory and antirheumatic products           | 47.9                  | 50.1 | -0.04     | 48.5                 | 49.0 | -0.01     |
| Antineoplastic agents                                 | 29.8                  | 38.5 | -0.18     | 32.6                 | 32.2 | 0.01      |
| Antipsoriatics                                        | 0.9                   | 1.1  | -0.03     | 0.9                  | 0.9  | 0.00      |
| Antithrombotic agents                                 | 11.8                  | 10.6 | 0.04      | 11.5                 | 11.4 | 0.00      |
| Beta blocking agents                                  | 23.2                  | 22.4 | 0.02      | 23.1                 | 23.2 | 0.00      |
| Calcium channel blockers                              | 17.8                  | 16.6 | 0.03      | 17.6                 | 17.8 | 0.00      |
| Diuretics                                             | 30.3                  | 29.0 | 0.03      | 30.0                 | 30.7 | -0.02     |
| Drugs for acid related disorders                      | 33.7                  | 34.4 | -0.02     | 33.8                 | 34.4 | -0.01     |
| Drugs for obstructive airway diseases                 | 29.4                  | 28.9 | 0.01      | 29.2                 | 29.5 | 0.00      |
| Drugs used in diabetes                                | 14.1                  | 14.1 | 0.00      | 14.1                 | 14.5 | -0.01     |
| Immunosuppressants                                    | 38.7                  | 53.1 | -0.29     | 43.0                 | 42.2 | 0.02      |
| Lipid modifying agents                                | 31.9                  | 32.1 | 0.00      | 32.0                 | 32.6 | -0.01     |
| Opioids                                               | 38.4                  | 40.2 | -0.04     | 38.8                 | 38.9 | 0.00      |
| Psycholeptics                                         | 30.4                  | 29.3 | 0.02      | 30.1                 | 29.9 | 0.00      |
| Psychostimulants, agents used for adhd and nootropics | 4.0                   | 3.7  | 0.02      | 4.0                  | 3.7  | 0.01      |

## S6.1.5. DAGermany

| Characteristic                           | Before stratification |      |           | After stratification |      |           |
|------------------------------------------|-----------------------|------|-----------|----------------------|------|-----------|
|                                          | HCQ                   | SSZ  |           | HCQ                  | SSZ  |           |
|                                          | %                     | %    | Std. diff | %                    | %    | Std. diff |
| Age group                                |                       |      |           |                      |      |           |
| 15-19                                    | 0.3                   | 0.5  | -0.03     | 0.3                  | 0.5  | -0.03     |
| 20-24                                    | 1.1                   | 1.3  | -0.02     | 1.1                  | 1.2  | -0.01     |
| 25-29                                    | 1.9                   | 2.4  | -0.04     | 2.0                  | 2.4  | -0.03     |
| 30-34                                    | 2.4                   | 3.5  | -0.07     | 2.9                  | 3.0  | -0.01     |
| 35-39                                    | 4.0                   | 4.1  | -0.01     | 3.9                  | 4.1  | -0.01     |
| 40-44                                    | 5.8                   | 6.6  | -0.03     | 6.1                  | 6.3  | -0.01     |
| 50-54                                    | 12.0                  | 12.7 | -0.02     | 12.7                 | 12.5 | 0.01      |
| 55-59                                    | 14.2                  | 14.8 | -0.02     | 14.8                 | 14.9 | 0.00      |
| 60-64                                    | 13.2                  | 12.1 | 0.03      | 12.3                 | 12.4 | 0.00      |
| 65-69                                    | 11.4                  | 10.6 | 0.03      | 11.2                 | 10.6 | 0.02      |
| 70-74                                    | 10.2                  | 9.5  | 0.02      | 9.8                  | 9.7  | 0.00      |
| 75-79                                    | 9.1                   | 7.5  | 0.06      | 8.2                  | 8.1  | 0.01      |
| 80-84                                    | 4.4                   | 3.9  | 0.02      | 4.2                  | 4.0  | 0.01      |
| 85-89                                    | 1.4                   | 1.0  | 0.04      | 1.2                  | 1.0  | 0.02      |
| 90-94                                    | 0.2                   | 0.2  | 0.00      | 0.2                  | 0.2  | 0.00      |
| Gender: female                           | 81.4                  | 72.5 | 0.21      | 76.0                 | 77.2 | -0.03     |
| Medical history: General                 |                       |      |           |                      |      |           |
| Acute respiratory disease                | 11.9                  | 12.6 | -0.02     | 12.2                 | 12.0 | 0.01      |
| Attention deficit hyperactivity disorder | <0.1                  | 0.1  | -0.01     | <0.1                 | <0.1 | 0.02      |
| Chronic liver disease                    | 0.6                   | 0.3  | 0.05      | 0.6                  | 0.3  | 0.05      |
| Chronic obstructive lung disease         | 3.4                   | 4.0  | -0.03     | 3.4                  | 3.7  | -0.02     |
| Crohn's disease                          | 0.2                   | 1.5  | -0.14     | 0.5                  | 1.0  | -0.06     |
| Dementia                                 | 0.6                   | 0.5  | 0.01      | 0.6                  | 0.5  | 0.01      |
| Depressive disorder                      | 8.3                   | 8.3  | 0.00      | 8.2                  | 8.0  | 0.01      |
| Diabetes mellitus                        | 6.9                   | 7.6  | -0.03     | 7.3                  | 7.1  | 0.01      |
| Gastroesophageal reflux disease          | 1.9                   | 2.0  | -0.01     | 1.9                  | 2.0  | 0.00      |
| Gastrointestinal hemorrhage              | 0.4                   | 0.6  | -0.03     | 0.5                  | 0.6  | -0.02     |
| Hyperlipidemia                           | 7.1                   | 8.4  | -0.05     | 8.0                  | 7.7  | 0.01      |
| Hypertensive disorder                    | 18.5                  | 19.2 | -0.02     | 19.0                 | 18.3 | 0.02      |
| Lesion of liver                          | 0.5                   | 0.3  | 0.03      | 0.4                  | 0.3  | 0.02      |
| Obesity                                  | 2.2                   | 2.4  | -0.01     | 2.2                  | 2.2  | 0.00      |
| Osteoarthritis                           | 11.4                  | 13.2 | -0.06     | 12.4                 | 12.1 | 0.01      |
| Pneumonia                                | 1.9                   | 1.5  | 0.03      | 2.0                  | 1.6  | 0.04      |
| Psoriasis                                | 2.3                   | 4.4  | -0.12     | 3.7                  | 3.5  | 0.01      |
| Renal impairment                         | 2.6                   | 2.3  | 0.02      | 2.4                  | 2.4  | 0.00      |
| Rheumatoid arthritis                     | 46.4                  | 54.7 | -0.17     | 52.4                 | 50.1 | 0.04      |
| Schizophrenia                            | <0.1                  | 0.1  | -0.03     | <0.1                 | 0.1  | -0.01     |
| Ulcerative colitis                       | 0.2                   | 1.6  | -0.16     | 0.4                  | 1.1  | -0.08     |
| Urinary tract infectious disease         | 4.0                   | 4.1  | -0.01     | 4.0                  | 3.9  | 0.00      |
| Viral hepatitis C                        | 0.3                   | 0.1  | 0.04      | 0.3                  | 0.1  | 0.04      |
| Visual system disorder                   | 5.8                   | 5.6  | 0.01      | 5.6                  | 5.5  | 0.01      |
| Medical history: Cardiovascular disease  |                       |      |           |                      |      |           |
| Atrial fibrillation                      | 0.8                   | 0.8  | 0.00      | 0.8                  | 0.7  | 0.00      |
| Cerebrovascular disease                  | 1.4                   | 1.8  | -0.03     | 1.4                  | 1.6  | -0.02     |
| Coronary arteriosclerosis                | 1.0                   | 1.1  | -0.01     | 1.1                  | 1.1  | 0.00      |
| Heart disease                            | 10.5                  | 11.4 | -0.03     | 10.6                 | 10.6 | 0.00      |
| Heart failure                            | 2.1                   | 2.6  | -0.04     | 2.0                  | 2.4  | -0.03     |
| Ischemic heart disease                   | 4.3                   | 5.2  | -0.04     | 4.7                  | 4.6  | 0.00      |
| Peripheral vascular disease              | 1.0                   | 1.0  | 0.00      | 0.9                  | 0.9  | 0.00      |
| Pulmonary embolism                       | 0.6                   | 0.3  | 0.04      | 0.6                  | 0.4  | 0.03      |
| Venous thrombosis                        | 1.3                   | 1.4  | -0.02     | 1.5                  | 1.5  | 0.00      |
| Medical history: Neoplasms               |                       |      |           |                      |      |           |
| Hematologic neoplasm                     | 0.3                   | 0.2  | 0.03      | 0.3                  | 0.2  | 0.02      |
| Malignant lymphoma                       | 0.2                   | 0.2  | 0.01      | 0.2                  | 0.1  | 0.01      |
| Malignant neoplasm of anorectum          | 0.2                   | 0.2  | 0.01      | 0.1                  | 0.1  | 0.00      |
| Malignant neoplastic disease             | 3.4                   | 3.2  | 0.01      | 3.2                  | 3.2  | 0.00      |

Risk of hydroxychloroquine with azithromycin

| Characteristic                                        | Before stratification |      |           | After stratification |      |           |
|-------------------------------------------------------|-----------------------|------|-----------|----------------------|------|-----------|
|                                                       | HCQ                   | SSZ  |           | HCQ                  | SSZ  |           |
|                                                       | %                     | %    | Std. diff | %                    | %    | Std. diff |
| Malignant tumor of breast                             | 0.7                   | 0.6  | 0.01      | 0.6                  | 0.6  | 0.00      |
| Malignant tumor of colon                              | 0.3                   | 0.1  | 0.03      | 0.3                  | 0.1  | 0.04      |
| Malignant tumor of lung                               | <0.1                  | <0.1 | 0.02      | <0.1                 | <0.1 | 0.00      |
| Malignant tumor of urinary bladder                    | <0.1                  | 0.2  | -0.05     | <0.1                 | 0.2  | -0.05     |
| Primary malignant neoplasm of prostate                | 0.2                   | 0.3  | -0.03     | 0.2                  | 0.2  | -0.02     |
| Medication use                                        |                       |      |           |                      |      |           |
| Agents acting on the renin-angiotensin system         | 16.7                  | 17.1 | -0.01     | 16.8                 | 16.5 | 0.01      |
| Antibacterials for systemic use                       | 12.7                  | 14.7 | -0.06     | 13.5                 | 13.7 | 0.00      |
| Antiepileptics                                        | 3.0                   | 2.3  | 0.04      | 2.6                  | 2.2  | 0.02      |
| Antiinflammatory and antirheumatic products           | 33.3                  | 36.1 | -0.06     | 35.4                 | 34.7 | 0.01      |
| Antineoplastic agents                                 | 31.8                  | 26.8 | 0.11      | 29.4                 | 30.4 | -0.02     |
| Antipsoriatics                                        | 0.2                   | 0.3  | -0.01     | 0.2                  | 0.2  | 0.00      |
| Antithrombotic agents                                 | 10.1                  | 9.9  | 0.01      | 9.6                  | 9.4  | 0.01      |
| Beta blocking agents                                  | 13.7                  | 13.3 | 0.01      | 13.0                 | 13.1 | 0.00      |
| Calcium channel blockers                              | 7.6                   | 7.7  | 0.00      | 7.6                  | 7.3  | 0.01      |
| Diuretics                                             | 13.9                  | 14.6 | -0.02     | 14.5                 | 13.7 | 0.02      |
| Drugs for acid related disorders                      | 32.1                  | 32.7 | -0.01     | 32.3                 | 32.5 | 0.00      |
| Drugs for obstructive airway diseases                 | 7.0                   | 7.7  | -0.03     | 7.4                  | 7.2  | 0.01      |
| Drugs used in diabetes                                | 4.4                   | 4.8  | -0.02     | 4.7                  | 4.5  | 0.01      |
| Immunosuppressants                                    | 40.7                  | 35.0 | 0.12      | 38.9                 | 38.5 | 0.01      |
| Lipid modifying agents                                | 7.3                   | 9.2  | -0.07     | 8.2                  | 8.2  | 0.00      |
| Opioids                                               | 12.5                  | 12.9 | -0.01     | 12.2                 | 12.3 | 0.00      |
| Psycholeptics                                         | 4.8                   | 6.0  | -0.05     | 4.8                  | 5.3  | -0.02     |
| Psychostimulants, agents used for adhd and nootropics | 0.2                   | 0.4  | -0.03     | 0.2                  | 0.3  | -0.03     |

## S6.1.6. IMRD

| Characteristic                          | Before stratification |      |           | After stratification |      |           |
|-----------------------------------------|-----------------------|------|-----------|----------------------|------|-----------|
|                                         | HCQ                   | SSZ  |           | HCQ                  | SSZ  |           |
|                                         | %                     | %    | Std. diff | %                    | %    | Std. diff |
| Age group                               |                       |      |           |                      |      |           |
| 15-19                                   | 0.2                   | 0.2  | 0.02      | 0.2                  | 0.2  | 0.01      |
| 20-24                                   | 0.8                   | 1.0  | -0.03     | 0.8                  | 1.0  | -0.02     |
| 25-29                                   | 1.2                   | 1.6  | -0.03     | 1.4                  | 1.6  | -0.01     |
| 30-34                                   | 2.8                   | 3.2  | -0.02     | 2.9                  | 3.1  | -0.01     |
| 35-39                                   | 4.8                   | 5.0  | -0.01     | 5.0                  | 4.8  | 0.01      |
| 40-44                                   | 6.0                   | 6.1  | 0.00      | 6.3                  | 6.0  | 0.01      |
| 45-49                                   | 8.7                   | 7.8  | 0.03      | 8.4                  | 8.5  | 0.00      |
| 50-54                                   | 11.3                  | 10.8 | 0.02      | 11.2                 | 11.0 | 0.01      |
| 55-59                                   | 13.0                  | 12.4 | 0.02      | 12.7                 | 12.4 | 0.01      |
| 60-64                                   | 13.2                  | 13.8 | -0.02     | 13.5                 | 13.5 | 0.00      |
| 65-69                                   | 13.0                  | 12.8 | 0.01      | 12.9                 | 13.0 | 0.00      |
| 70-74                                   | 11.0                  | 11.4 | -0.01     | 11.2                 | 11.2 | 0.00      |
| 75-79                                   | 7.7                   | 8.3  | -0.02     | 7.8                  | 8.0  | 0.00      |
| 80-84                                   | 4.4                   | 4.1  | 0.02      | 4.1                  | 4.2  | 0.00      |
| 85-89                                   | 1.5                   | 1.3  | 0.02      | 1.3                  | 1.4  | -0.01     |
| 90-94                                   | 0.3                   | 0.2  | 0.02      | 0.2                  | 0.2  | 0.00      |
| Gender: female                          | 73.2                  | 68.0 | 0.11      | 70.7                 | 71.0 | 0.00      |
| Race                                    |                       |      |           |                      |      |           |
| race = Asian                            | 0.1                   | 0.1  | 0.02      | 0.1                  | 0.1  | 0.00      |
| race = White                            | 29.8                  | 25.8 | 0.09      | 27.4                 | 27.6 | 0.00      |
| race = Asian Indian                     | 0.7                   | 0.4  | 0.04      | 0.6                  | 0.5  | 0.02      |
| race = Bangladeshi                      | 0.1                   | <0.1 | 0.02      | <0.1                 | <0.1 | 0.02      |
| race = Chinese                          | 0.1                   | <0.1 | 0.03      | 0.1                  | <0.1 | 0.03      |
| race = Pakistani                        | 0.3                   | 0.2  | 0.03      | 0.3                  | 0.2  | 0.03      |
| race = Black                            | 0.4                   | 0.2  | 0.03      | 0.3                  | 0.2  | 0.02      |
| race = African                          | 0.2                   | <0.1 | 0.05      | 0.2                  | <0.1 | 0.04      |
| race = European                         | 0.1                   | <0.1 | 0.02      | 0.1                  | <0.1 | 0.02      |
| Medical history: General                |                       |      |           |                      |      |           |
| Acute respiratory disease               | 9.2                   | 9.3  | 0.00      | 9.2                  | 9.1  | 0.00      |
| Chronic liver disease                   | 0.1                   | 0.1  | 0.00      | <0.1                 | <0.1 | 0.00      |
| Chronic obstructive lung disease        | 2.1                   | 2.5  | -0.02     | 2.2                  | 2.3  | -0.01     |
| Crohn's disease                         | <0.1                  | 0.2  | -0.05     | <0.1                 | 0.1  | -0.04     |
| Dementia                                | 0.2                   | 0.1  | 0.03      | 0.1                  | 0.1  | 0.02      |
| Depressive disorder                     | 2.6                   | 2.9  | -0.02     | 2.9                  | 2.7  | 0.01      |
| Diabetes mellitus                       | 2.3                   | 2.2  | 0.01      | 2.2                  | 2.1  | 0.01      |
| Gastroesophageal reflux disease         | 0.3                   | 0.6  | -0.03     | 0.4                  | 0.6  | -0.03     |
| Gastrointestinal hemorrhage             | 0.9                   | 1.3  | -0.04     | 1.0                  | 1.1  | -0.01     |
| Hyperlipidemia                          | 1.1                   | 1.3  | -0.02     | 1.1                  | 1.2  | 0.00      |
| Hypertensive disorder                   | 3.1                   | 3.7  | -0.03     | 3.2                  | 3.3  | 0.00      |
| Lesion of liver                         | 0.1                   | 0.1  | 0.01      | 0.1                  | <0.1 | 0.01      |
| Obesity                                 | 0.3                   | 0.5  | -0.03     | 0.4                  | 0.6  | -0.03     |
| Osteoarthritis                          | 7.5                   | 9.4  | -0.07     | 8.1                  | 8.2  | 0.00      |
| Pneumonia                               | 0.7                   | 0.6  | 0.00      | 0.7                  | 0.7  | 0.00      |
| Psoriasis                               | 0.8                   | 2.2  | -0.12     | 1.3                  | 1.6  | -0.02     |
| Rheumatoid arthritis                    | 61.4                  | 69.3 | -0.17     | 65.6                 | 63.7 | 0.04      |
| Schizophrenia                           | <0.1                  | <0.1 | 0.01      | <0.1                 | <0.1 | 0.02      |
| Ulcerative colitis                      | <0.1                  | <0.1 | -0.01     | <0.1                 | <0.1 | -0.01     |
| Urinary tract infectious disease        | 3.1                   | 2.9  | 0.01      | 3.1                  | 3.0  | 0.01      |
| Visual system disorder                  | 6.6                   | 7.0  | -0.02     | 6.6                  | 6.8  | 0.00      |
| Medical history: Cardiovascular disease |                       |      |           |                      |      |           |
| Atrial fibrillation                     | 0.7                   | 0.7  | 0.00      | 0.7                  | 0.6  | 0.01      |
| Cerebrovascular disease                 | 0.5                   | 0.7  | -0.03     | 0.5                  | 0.7  | -0.02     |
| Coronary arteriosclerosis               | 0.1                   | 0.1  | 0.01      | 0.1                  | 0.1  | 0.02      |
| Heart disease                           | 2.7                   | 2.9  | -0.01     | 2.8                  | 2.6  | 0.01      |
| Heart failure                           | 0.4                   | 0.4  | -0.01     | 0.4                  | 0.4  | 0.01      |
| Ischemic heart disease                  | 0.8                   | 1.2  | -0.04     | 1.0                  | 1.0  | 0.00      |

Risk of hydroxychloroquine with azithromycin

| Characteristic                                | Before stratification |      |           | After stratification |      |           |
|-----------------------------------------------|-----------------------|------|-----------|----------------------|------|-----------|
|                                               | HCQ                   | SSZ  |           | HCQ                  | SSZ  |           |
|                                               | %                     | %    | Std. diff | %                    | %    | Std. diff |
| Peripheral vascular disease                   | 0.2                   | 0.2  | 0.01      | 0.3                  | 0.2  | 0.02      |
| Pulmonary embolism                            | 0.2                   | 0.2  | -0.01     | 0.2                  | 0.3  | -0.02     |
| Venous thrombosis                             | 0.8                   | 1.1  | -0.03     | 0.8                  | 1.1  | -0.02     |
| Medical history: Neoplasms                    |                       |      |           |                      |      |           |
| Hematologic neoplasm                          | 0.1                   | 0.1  | 0.01      | 0.1                  | <0.1 | 0.02      |
| Malignant neoplasm of anorectum               | <0.1                  | <0.1 | 0.02      | <0.1                 | <0.1 | 0.02      |
| Malignant neoplastic disease                  | 1.3                   | 1.1  | 0.02      | 1.2                  | 1.0  | 0.02      |
| Malignant tumor of breast                     | 0.2                   | 0.2  | 0.02      | 0.2                  | 0.2  | 0.01      |
| Malignant tumor of colon                      | <0.1                  | <0.1 | -0.01     | <0.1                 | <0.1 | 0.00      |
| Malignant tumor of lung                       | 0.1                   | 0.1  | 0.01      | 0.1                  | 0.1  | 0.02      |
| Medication use                                |                       |      |           |                      |      |           |
| Agents acting on the renin-angiotensin system | 0.6                   | 0.6  | 0.00      | 0.6                  | 0.8  | -0.02     |
| Antibacterials for systemic use               | 3.8                   | 3.4  | 0.02      | 3.6                  | 3.5  | 0.01      |
| Antidepressants                               | 1.1                   | 1.1  | -0.01     | 1.0                  | 1.2  | -0.02     |
| Antiepileptics                                | 0.1                   | 0.2  | -0.03     | 0.1                  | 0.2  | -0.03     |
| Antiinflammatory and antirheumatic products   | 1.6                   | 1.9  | -0.03     | 1.6                  | 1.8  | -0.01     |
| Antineoplastic agents                         | 1.5                   | 0.6  | 0.08      | 1.2                  | 0.9  | 0.02      |
| Antithrombotic agents                         | 1.1                   | 1.1  | 0.00      | 1.2                  | 1.2  | 0.00      |
| Beta blocking agents                          | 0.4                   | 0.6  | -0.02     | 0.5                  | 0.6  | -0.01     |
| Calcium channel blockers                      | 0.6                   | 0.5  | 0.00      | 0.6                  | 0.5  | 0.02      |
| Diuretics                                     | 0.8                   | 1.0  | -0.02     | 1.0                  | 0.9  | 0.01      |
| Drugs for acid related disorders              | 1.6                   | 1.7  | 0.00      | 1.7                  | 1.7  | 0.01      |
| Drugs for obstructive airway diseases         | 0.4                   | 0.4  | 0.00      | 0.5                  | 0.4  | 0.00      |
| Drugs used in diabetes                        | 0.2                   | 0.2  | 0.01      | 0.2                  | 0.2  | 0.00      |
| Immunosuppressants                            | 1.6                   | 0.7  | 0.08      | 1.3                  | 1.0  | 0.02      |
| Lipid modifying agents                        | 0.9                   | 0.9  | 0.00      | 0.9                  | 1.0  | -0.01     |
| Opioids                                       | 0.6                   | 0.6  | -0.01     | 0.6                  | 0.6  | -0.01     |
| Psycholeptics                                 | 0.4                   | 0.5  | -0.01     | 0.4                  | 0.4  | -0.01     |

## S6.1.7. IPCI

| Characteristic                                | Before stratification |      |           | After stratification |      |           |
|-----------------------------------------------|-----------------------|------|-----------|----------------------|------|-----------|
|                                               | HCQ                   | SSZ  |           | HCQ                  | SSZ  |           |
|                                               | %                     | %    | Std. diff | %                    | %    | Std. diff |
| Age group                                     |                       |      |           |                      |      |           |
| 15-19                                         | 0.4                   | <0.9 | 0.00      | 0.4                  | <0.9 | 0.02      |
| 20-24                                         | 0.6                   | 1.3  | -0.07     | 0.6                  | 1.0  | -0.04     |
| 25-29                                         | 1.4                   | 3.0  | -0.11     | 1.5                  | 2.7  | -0.08     |
| 30-34                                         | 1.6                   | 4.4  | -0.16     | 1.8                  | 3.7  | -0.12     |
| 35-39                                         | 3.2                   | 4.0  | -0.04     | 3.4                  | 4.0  | -0.03     |
| 40-44                                         | 6.0                   | 4.4  | 0.08      | 6.4                  | 3.4  | 0.14      |
| 45-49                                         | 8.5                   | 10.4 | -0.06     | 9.0                  | 10.1 | -0.04     |
| 50-54                                         | 10.5                  | 9.7  | 0.03      | 11.0                 | 9.1  | 0.06      |
| 55-59                                         | 11.2                  | 14.6 | -0.10     | 11.5                 | 14.4 | -0.09     |
| 60-64                                         | 12.2                  | 12.3 | 0.00      | 11.7                 | 12.7 | -0.03     |
| 65-69                                         | 11.8                  | 12.9 | -0.03     | 11.9                 | 12.4 | -0.02     |
| 70-74                                         | 12.3                  | 9.8  | 0.08      | 12.0                 | 10.6 | 0.04      |
| 75-79                                         | 9.0                   | 8.5  | 0.02      | 8.8                  | 9.8  | -0.04     |
| 80-84                                         | 7.4                   | 3.2  | 0.19      | 6.7                  | 4.3  | 0.11      |
| 85-89                                         | 2.8                   | 0.9  | 0.14      | 2.7                  | 1.4  | 0.09      |
| 90-94                                         | 0.8                   | <0.9 | 0.09      | 0.8                  | <0.9 | 0.08      |
| Gender: female                                | 68.4                  | 68.0 | 0.01      | 68.6                 | 67.2 | 0.03      |
| Medical history: General                      |                       |      |           |                      |      |           |
| Acute respiratory disease                     | 14.1                  | 16.1 | -0.06     | 14.3                 | 16.2 | -0.05     |
| Attention deficit hyperactivity disorder      | <0.3                  | <0.9 | -0.03     | <0.3                 | <0.9 | -0.01     |
| Depressive disorder                           | 4.7                   | 4.2  | 0.02      | 4.8                  | 4.5  | 0.02      |
| Diabetes mellitus                             | 8.6                   | 8.9  | -0.01     | 8.2                  | 9.9  | -0.06     |
| Gastroesophageal reflux disease               | 0.7                   | <0.9 | 0.02      | 0.7                  | <0.9 | 0.04      |
| Gastrointestinal hemorrhage                   | 1.1                   | 1.9  | -0.07     | 1.0                  | 1.8  | -0.07     |
| Hyperlipidemia                                | 3.4                   | 4.0  | -0.03     | 3.4                  | 4.3  | -0.05     |
| Hypertensive disorder                         | 16.3                  | 17.6 | -0.04     | 15.6                 | 17.6 | -0.06     |
| Obesity                                       | 1.1                   | 1.1  | 0.00      | 1.2                  | 1.1  | 0.01      |
| Osteoarthritis                                | 9.7                   | 6.4  | 0.12      | 9.4                  | 6.7  | 0.10      |
| Pneumonia                                     | 4.1                   | 4.5  | -0.02     | 3.9                  | 4.4  | -0.02     |
| Psoriasis                                     | 1.1                   | 2.8  | -0.12     | 1.2                  | 2.5  | -0.09     |
| Renal impairment                              | 2.1                   | 1.5  | 0.04      | 2.0                  | 1.4  | 0.05      |
| Ulcerative colitis                            | <0.3                  | 0.9  | -0.10     | <0.3                 | 1.1  | -0.12     |
| Urinary tract infectious disease              | 9.1                   | 7.4  | 0.06      | 9.0                  | 7.0  | 0.08      |
| Visual system disorder                        | 13.3                  | 13.4 | 0.00      | 13.4                 | 12.1 | 0.04      |
| Medical history: Cardiovascular disease       |                       |      |           |                      |      |           |
| Atrial fibrillation                           | 2.9                   | 2.3  | 0.04      | 2.7                  | 2.3  | 0.02      |
| Cerebrovascular disease                       | 2.6                   | 3.0  | -0.03     | 2.4                  | 3.4  | -0.06     |
| Coronary arteriosclerosis                     | 0.5                   | <0.9 | 0.05      | 0.5                  | <0.9 | 0.07      |
| Heart disease                                 | 10.2                  | 9.1  | 0.04      | 9.7                  | 10.0 | -0.01     |
| Heart failure                                 | 1.6                   | 1.1  | 0.04      | 1.5                  | 1.4  | 0.01      |
| Ischemic heart disease                        | 4.5                   | 4.4  | 0.00      | 4.3                  | 5.0  | -0.03     |
| Peripheral vascular disease                   | 3.6                   | 4.4  | -0.04     | 3.7                  | 4.6  | -0.05     |
| Pulmonary embolism                            | 0.4                   | <0.9 | -0.02     | 0.4                  | <0.9 | -0.01     |
| Venous thrombosis                             | 1.4                   | 0.9  | 0.04      | 1.4                  | <0.9 | 0.07      |
| Medical history: Neoplasms                    |                       |      |           |                      |      |           |
| Malignant lymphoma                            | <0.3                  | <0.9 | -0.02     | <0.3                 | <0.9 | 0.01      |
| Malignant neoplasm of anorectum               | 0.5                   | <0.9 | -0.04     | 0.4                  | <0.9 | -0.04     |
| Malignant neoplastic disease                  | 4.5                   | 4.4  | 0.01      | 4.5                  | 4.3  | 0.01      |
| Malignant tumor of breast                     | 1.1                   | <0.9 | 0.06      | 1.2                  | <0.9 | 0.10      |
| Malignant tumor of lung                       | 0.5                   | 0.9  | -0.06     | 0.5                  | 1.3  | -0.09     |
| Medication use                                |                       |      |           |                      |      |           |
| Agents acting on the renin-angiotensin system | 29.6                  | 23.5 | 0.14      | 28.0                 | 26.6 | 0.03      |
| Antibacterials for systemic use               | 30.4                  | 29.5 | 0.02      | 30.4                 | 29.1 | 0.03      |
| Antidepressants                               | 12.8                  | 13.6 | -0.02     | 12.8                 | 13.8 | -0.03     |
| Antiepileptics                                | 5.0                   | 4.9  | 0.00      | 5.0                  | 5.6  | -0.03     |
| Antiinflammatory and antirheumatic products   | 42.7                  | 45.1 | -0.05     | 42.5                 | 42.9 | -0.01     |

## Risk of hydroxychloroquine with azithromycin

| Characteristic                                        | Before stratification |      |           | After stratification |      |           |
|-------------------------------------------------------|-----------------------|------|-----------|----------------------|------|-----------|
|                                                       | HCQ                   | SSZ  |           | HCQ                  | SSZ  |           |
|                                                       | %                     | %    | Std. diff | %                    | %    | Std. diff |
| Antineoplastic agents                                 | 42.5                  | 41.1 | 0.03      | 41.2                 | 45.5 | -0.09     |
| Antipsoriatics                                        | 0.7                   | <0.9 | 0.00      | 0.8                  | 0.9  | 0.00      |
| Antithrombotic agents                                 | 22.2                  | 18.4 | 0.10      | 20.5                 | 22.6 | -0.05     |
| Beta blocking agents                                  | 24.0                  | 21.4 | 0.06      | 22.7                 | 24.2 | -0.04     |
| Calcium channel blockers                              | 16.0                  | 12.5 | 0.10      | 15.2                 | 14.5 | 0.02      |
| Diuretics                                             | 25.3                  | 23.1 | 0.05      | 24.0                 | 24.5 | -0.01     |
| Drugs for acid related disorders                      | 66.9                  | 67.8 | -0.02     | 66.0                 | 67.6 | -0.03     |
| Drugs for obstructive airway diseases                 | 25.4                  | 26.7 | -0.03     | 25.6                 | 26.8 | -0.03     |
| Drugs used in diabetes                                | 11.5                  | 11.4 | 0.00      | 11.0                 | 13.9 | -0.09     |
| Immunosuppressants                                    | 44.8                  | 46.8 | -0.04     | 44.0                 | 49.1 | -0.10     |
| Lipid modifying agents                                | 29.3                  | 25.0 | 0.10      | 27.6                 | 29.5 | -0.04     |
| Opioids                                               | 20.8                  | 21.2 | -0.01     | 20.6                 | 22.7 | -0.05     |
| Psycholeptics                                         | 19.5                  | 19.3 | 0.01      | 19.4                 | 19.9 | -0.01     |
| Psychostimulants, agents used for adhd and nootropics | 0.9                   | 1.1  | -0.03     | 0.9                  | 1.7  | -0.07     |

## S6.1.8. JMDC

| Characteristic                                | Before stratification |      |           | After stratification |      |           |
|-----------------------------------------------|-----------------------|------|-----------|----------------------|------|-----------|
|                                               | HCQ                   | SSZ  |           | HCQ                  | SSZ  |           |
|                                               | %                     | %    | Std. diff | %                    | %    | Std. diff |
| Age group                                     |                       |      |           |                      |      |           |
| 15-19                                         | <2.1                  | <0.2 | 0.12      | <0.8                 | <0.3 | 0.04      |
| 20-24                                         | 4.1                   | 1.1  | 0.19      | 1.4                  | 1.2  | 0.02      |
| 25-29                                         | 5.4                   | 2.2  | 0.17      | 1.8                  | 2.2  | -0.03     |
| 30-34                                         | 9.1                   | 3.8  | 0.22      | 3.1                  | 3.8  | -0.04     |
| 35-39                                         | 9.5                   | 7.4  | 0.08      | 3.2                  | 7.1  | -0.17     |
| 40-44                                         | 15.4                  | 10.3 | 0.15      | 38.4                 | 10.4 | 0.65      |
| 50-54                                         | 16.6                  | 16.5 | 0.00      | 16.6                 | 16.6 | 0.00      |
| 55-59                                         | 13.7                  | 16.0 | -0.06     | 15.6                 | 16.3 | -0.02     |
| 60-64                                         | 4.1                   | 13.4 | -0.33     | 1.4                  | 13.0 | -0.46     |
| 65-69                                         | 3.3                   | 8.4  | -0.22     | 1.1                  | 8.7  | -0.35     |
| 70-74                                         | <2.1                  | 3.4  | -0.22     | <0.8                 | 3.6  | -0.26     |
| Gender: female                                | 89.6                  | 68.2 | 0.54      | 85.5                 | 69.6 | 0.38      |
| Medical history: General                      |                       |      |           |                      |      |           |
| Acute respiratory disease                     | 57.3                  | 52.4 | 0.10      | 63.6                 | 53.6 | 0.20      |
| Chronic liver disease                         | 10.8                  | 5.5  | 0.20      | 3.7                  | 5.9  | -0.10     |
| Chronic obstructive lung disease              | <2.1                  | 1.5  | 0.02      | <0.8                 | 1.5  | -0.09     |
| Crohn's disease                               | <2.1                  | 0.5  | -0.02     | <0.8                 | 0.7  | -0.08     |
| Depressive disorder                           | 12.0                  | 8.6  | 0.11      | 37.3                 | 9.2  | 0.66      |
| Diabetes mellitus                             | 39.8                  | 18.5 | 0.48      | 13.5                 | 19.8 | -0.16     |
| Gastroesophageal reflux disease               | <2.1                  | 0.3  | 0.01      | <0.8                 | 0.3  | -0.04     |
| Gastrointestinal hemorrhage                   | 5.4                   | 1.3  | 0.23      | 12.8                 | 1.4  | 0.42      |
| Hyperlipidemia                                | 46.5                  | 26.4 | 0.43      | 48.9                 | 27.5 | 0.43      |
| Hypertensive disorder                         | 49.0                  | 23.6 | 0.55      | 27.6                 | 24.8 | 0.06      |
| Lesion of liver                               | 5.8                   | 1.5  | 0.23      | 2.0                  | 1.5  | 0.03      |
| Obesity                                       | <2.1                  | 0.8  | -0.05     | <0.8                 | 0.9  | -0.10     |
| Osteoarthritis                                | 20.3                  | 38.7 | -0.41     | 17.9                 | 38.1 | -0.45     |
| Pneumonia                                     | 9.5                   | 4.8  | 0.19      | 47.4                 | 5.2  | 1.02      |
| Psoriasis                                     | 3.3                   | 5.5  | -0.10     | 1.1                  | 5.6  | -0.25     |
| Renal impairment                              | 9.5                   | 1.9  | 0.34      | 3.2                  | 2.2  | 0.06      |
| Rheumatoid arthritis                          | 86.3                  | 99.0 | -0.50     | 95.4                 | 98.9 | -0.20     |
| Schizophrenia                                 | 3.3                   | 2.3  | 0.06      | 1.1                  | 2.5  | -0.10     |
| Ulcerative colitis                            | <2.1                  | 1.5  | -0.02     | <0.8                 | 1.8  | -0.13     |
| Urinary tract infectious disease              | 4.6                   | 2.5  | 0.11      | 34.7                 | 2.8  | 0.83      |
| Viral hepatitis C                             | 2.5                   | 1.8  | 0.05      | 0.8                  | 1.8  | -0.08     |
| Visual system disorder                        | 93.4                  | 43.1 | 1.28      | 53.6                 | 47.5 | 0.12      |
| Medical history: Cardiovascular disease       |                       |      |           |                      |      |           |
| Cerebrovascular disease                       | 4.1                   | 2.8  | 0.08      | 1.4                  | 2.9  | -0.10     |
| Coronary arteriosclerosis                     | <2.1                  | <0.2 | 0.05      | <0.8                 | <0.3 | -0.02     |
| Heart disease                                 | 40.7                  | 12.7 | 0.67      | 13.8                 | 13.8 | 0.00      |
| Heart failure                                 | 20.3                  | 5.8  | 0.44      | 6.9                  | 6.6  | 0.01      |
| Ischemic heart disease                        | 22.8                  | 5.1  | 0.53      | 7.7                  | 5.7  | 0.08      |
| Peripheral vascular disease                   | 6.2                   | 2.7  | 0.17      | 2.1                  | 2.8  | -0.04     |
| Pulmonary embolism                            | <2.1                  | 0.2  | 0.12      | <0.8                 | 0.4  | 0.00      |
| Venous thrombosis                             | 9.1                   | 1.6  | 0.34      | 3.1                  | 2.0  | 0.07      |
| Medical history: Neoplasms                    |                       |      |           |                      |      |           |
| Hematologic neoplasm                          | <2.1                  | 0.9  | 0.00      | <0.8                 | 0.9  | -0.08     |
| Malignant lymphoma                            | 2.5                   | 1.2  | 0.09      | 0.8                  | 1.5  | -0.06     |
| Malignant neoplastic disease                  | 6.2                   | 6.7  | -0.02     | 2.1                  | 7.1  | -0.24     |
| Malignant tumor of breast                     | <2.1                  | 1.4  | -0.06     | <0.8                 | 1.5  | -0.13     |
| Malignant tumor of colon                      | <2.1                  | 0.6  | -0.03     | <0.8                 | 0.6  | -0.08     |
| Medication use                                |                       |      |           |                      |      |           |
| Agents acting on the renin-angiotensin system | 26.1                  | 12.7 | 0.35      | 8.9                  | 13.5 | -0.14     |
| Antibacterials for systemic use               | 71.4                  | 50.9 | 0.43      | 79.3                 | 52.5 | 0.57      |
| Antidepressants                               | 10.8                  | 7.2  | 0.13      | 3.7                  | 7.7  | -0.17     |



## Risk of hydroxychloroquine with azithromycin

| Characteristic                                        | Before stratification |      |           | After stratification |      |           |
|-------------------------------------------------------|-----------------------|------|-----------|----------------------|------|-----------|
|                                                       | HCQ                   | SSZ  |           | HCQ                  | SSZ  |           |
|                                                       | %                     | %    | Std. diff | %                    | %    | Std. diff |
| Antiepileptics                                        | 11.6                  | 10.9 | 0.02      | 3.9                  | 11.6 | -0.28     |
| Antiinflammatory and antirheumatic products           | 39.4                  | 72.9 | -0.72     | 79.5                 | 71.9 | 0.17      |
| Antineoplastic agents                                 | 15.4                  | 28.7 | -0.33     | 16.2                 | 28.5 | -0.29     |
| Antipsoriatics                                        | 2.1                   | 3.2  | -0.07     | <0.8                 | 3.4  | -0.19     |
| Antithrombotic agents                                 | 44.8                  | 12.1 | 0.78      | 15.2                 | 13.3 | 0.05      |
| Beta blocking agents                                  | 7.9                   | 3.9  | 0.17      | 13.6                 | 4.3  | 0.31      |
| Calcium channel blockers                              | 19.5                  | 12.4 | 0.20      | 17.6                 | 12.8 | 0.13      |
| Diuretics                                             | 9.5                   | 4.0  | 0.22      | 3.2                  | 4.3  | -0.05     |
| Drugs for acid related disorders                      | 90.0                  | 81.8 | 0.24      | 96.6                 | 81.8 | 0.48      |
| Drugs for obstructive airway diseases                 | 25.7                  | 23.3 | 0.06      | 52.9                 | 24.3 | 0.59      |
| Drugs used in diabetes                                | 8.7                   | 6.6  | 0.08      | 3.0                  | 7.1  | -0.19     |
| Immunosuppressants                                    | 66.8                  | 32.6 | 0.73      | 33.6                 | 33.8 | 0.00      |
| Lipid modifying agents                                | 27.4                  | 14.7 | 0.32      | 9.3                  | 15.6 | -0.18     |
| Opioids                                               | 27.4                  | 23.3 | 0.09      | 42.5                 | 24.4 | 0.37      |
| Psycholeptics                                         | 43.2                  | 27.5 | 0.33      | 58.8                 | 28.7 | 0.61      |
| Psychostimulants, agents used for adhd and nootropics | <2.1                  | 0.9  | -0.06     | <0.8                 | 0.9  | -0.11     |

## S6.1.9. MDCD

| Characteristic                           | Before stratification |      |           | After stratification |      |           |
|------------------------------------------|-----------------------|------|-----------|----------------------|------|-----------|
|                                          | HCQ                   | SSZ  |           | HCQ                  | SSZ  |           |
|                                          | %                     | %    | Std. diff | %                    | %    | Std. diff |
| Age group                                |                       |      |           |                      |      |           |
| 15-19                                    | 1.2                   | 1.2  | 0.00      | 1.2                  | 1.3  | -0.01     |
| 20-24                                    | 2.1                   | 2.8  | -0.04     | 2.1                  | 3.1  | -0.06     |
| 25-29                                    | 4.4                   | 3.8  | 0.03      | 4.3                  | 4.2  | 0.00      |
| 30-34                                    | 6.6                   | 6.8  | -0.01     | 6.4                  | 6.9  | -0.02     |
| 35-39                                    | 9.0                   | 8.8  | 0.01      | 8.8                  | 8.8  | 0.00      |
| 40-44                                    | 10.2                  | 9.3  | 0.03      | 10.0                 | 9.1  | 0.03      |
| 45-49                                    | 13.3                  | 13.0 | 0.01      | 13.2                 | 13.7 | -0.01     |
| 50-54                                    | 15.9                  | 16.1 | 0.00      | 16.2                 | 15.9 | 0.01      |
| 55-59                                    | 15.8                  | 16.2 | -0.01     | 15.9                 | 15.5 | 0.01      |
| 60-64                                    | 12.0                  | 13.9 | -0.06     | 12.3                 | 12.9 | -0.02     |
| 65-69                                    | 4.5                   | 4.0  | 0.02      | 4.6                  | 4.2  | 0.02      |
| 70-74                                    | 2.0                   | 1.9  | 0.01      | 2.0                  | 1.9  | 0.00      |
| 75-79                                    | 1.6                   | 1.0  | 0.06      | 1.6                  | 1.0  | 0.05      |
| 80-84                                    | 1.0                   | 1.0  | 0.00      | 1.0                  | 1.0  | 0.00      |
| 85-89                                    | 0.4                   | <0.2 | 0.04      | 0.4                  | 0.3  | 0.01      |
| Gender: female                           | 85.9                  | 79.0 | 0.18      | 84.4                 | 84.5 | 0.00      |
| Race                                     |                       |      |           |                      |      |           |
| race = Black or African American         | 28.8                  | 24.7 | 0.09      | 27.9                 | 26.2 | 0.04      |
| race = White                             | 54.4                  | 57.4 | -0.06     | 55.1                 | 54.9 | 0.00      |
| Ethnicity                                |                       |      |           |                      |      |           |
| ethnicity = Hispanic or Latino           | 2.3                   | 1.9  | 0.03      | 2.4                  | 2.1  | 0.02      |
| Medical history: General                 |                       |      |           |                      |      |           |
| Acute respiratory disease                | 41.8                  | 40.5 | 0.03      | 41.5                 | 41.6 | 0.00      |
| Attention deficit hyperactivity disorder | 2.6                   | 2.0  | 0.04      | 2.6                  | 2.1  | 0.03      |
| Chronic liver disease                    | 6.9                   | 7.4  | -0.02     | 6.9                  | 7.4  | -0.02     |
| Chronic obstructive lung disease         | 21.0                  | 21.6 | -0.02     | 21.2                 | 21.5 | -0.01     |
| Crohn's disease                          | 0.8                   | 3.5  | -0.19     | 1.0                  | 1.9  | -0.08     |
| Dementia                                 | 1.2                   | 0.9  | 0.03      | 1.1                  | 1.1  | 0.01      |
| Depressive disorder                      | 36.0                  | 35.4 | 0.01      | 35.5                 | 35.8 | -0.01     |
| Gastroesophageal reflux disease          | 29.5                  | 30.8 | -0.03     | 29.5                 | 30.7 | -0.03     |
| Gastrointestinal hemorrhage              | 4.9                   | 6.4  | -0.06     | 5.0                  | 5.9  | -0.04     |
| Human immunodeficiency virus infection   | 0.5                   | 0.7  | -0.02     | 0.5                  | 0.8  | -0.03     |
| Hyperlipidemia                           | 36.4                  | 36.7 | -0.01     | 36.4                 | 38.3 | -0.04     |
| Hypertensive disorder                    | 55.7                  | 53.0 | 0.05      | 55.2                 | 54.6 | 0.01      |
| Lesion of liver                          | 2.0                   | 1.9  | 0.01      | 2.0                  | 2.2  | -0.01     |
| Obesity                                  | 21.5                  | 20.0 | 0.04      | 21.2                 | 20.2 | 0.02      |
| Osteoarthritis                           | 57.1                  | 57.0 | 0.00      | 57.4                 | 57.6 | 0.00      |
| Pneumonia                                | 8.7                   | 8.0  | 0.02      | 8.5                  | 8.0  | 0.02      |
| Psoriasis                                | 2.0                   | 6.6  | -0.23     | 2.5                  | 3.4  | -0.06     |
| Renal impairment                         | 9.4                   | 8.0  | 0.05      | 9.2                  | 8.3  | 0.03      |
| Rheumatoid arthritis                     | 80.9                  | 84.4 | -0.09     | 81.9                 | 83.4 | -0.04     |
| Schizophrenia                            | 1.7                   | 2.1  | -0.03     | 1.6                  | 2.3  | -0.05     |
| Ulcerative colitis                       | 0.5                   | 1.7  | -0.11     | 0.6                  | 1.2  | -0.06     |
| Urinary tract infectious disease         | 17.8                  | 16.5 | 0.04      | 17.4                 | 16.6 | 0.02      |
| Viral hepatitis C                        | 5.9                   | 6.0  | 0.00      | 5.9                  | 6.3  | -0.02     |
| Visual system disorder                   | 39.9                  | 40.7 | -0.02     | 40.0                 | 39.9 | 0.00      |
| Medical history: Cardiovascular disease  |                       |      |           |                      |      |           |
| Atrial fibrillation                      | 3.3                   | 2.3  | 0.06      | 3.2                  | 3.2  | 0.00      |
| Cerebrovascular disease                  | 5.3                   | 5.2  | 0.00      | 5.1                  | 5.3  | -0.01     |
| Coronary arteriosclerosis                | 9.7                   | 8.7  | 0.04      | 9.6                  | 10.1 | -0.02     |
| Heart disease                            | 29.7                  | 26.8 | 0.07      | 29.0                 | 28.8 | 0.00      |
| Ischemic heart disease                   | 7.3                   | 7.0  | 0.01      | 7.1                  | 8.0  | -0.03     |
| Peripheral vascular disease              | 4.8                   | 4.1  | 0.03      | 4.6                  | 4.3  | 0.02      |
| Pulmonary embolism                       | 2.0                   | 1.0  | 0.08      | 1.9                  | 1.6  | 0.02      |
| Venous thrombosis                        | 3.1                   | 2.5  | 0.04      | 2.9                  | 3.2  | -0.02     |
| Medical history: Neoplasms               |                       |      |           |                      |      |           |

Risk of hydroxychloroquine with azithromycin

| Characteristic                                        | Before stratification |      |           | After stratification |      |           |
|-------------------------------------------------------|-----------------------|------|-----------|----------------------|------|-----------|
|                                                       | HCQ                   | SSZ  |           | HCQ                  | SSZ  |           |
|                                                       | %                     | %    | Std. diff | %                    | %    | Std. diff |
| Hematologic neoplasm                                  | 1.5                   | 1.2  | 0.03      | 1.5                  | 1.2  | 0.02      |
| Malignant lymphoma                                    | 0.4                   | 0.5  | 0.00      | 0.4                  | 0.3  | 0.01      |
| Malignant neoplasm of anorectum                       | 0.2                   | 0.2  | -0.02     | 0.2                  | <0.2 | 0.00      |
| Malignant neoplastic disease                          | 7.2                   | 7.5  | -0.01     | 7.1                  | 7.4  | -0.02     |
| Malignant tumor of breast                             | 2.0                   | 1.7  | 0.02      | 1.9                  | 1.6  | 0.02      |
| Malignant tumor of colon                              | 0.3                   | 0.3  | 0.00      | 0.4                  | 0.3  | 0.01      |
| Malignant tumor of lung                               | 0.4                   | 0.3  | 0.02      | 0.4                  | 0.3  | 0.02      |
| Malignant tumor of urinary bladder                    | 0.2                   | <0.2 | 0.02      | 0.2                  | <0.2 | 0.04      |
| Primary malignant neoplasm of prostate                | 0.2                   | 0.2  | -0.01     | 0.2                  | <0.2 | 0.01      |
| Medication use                                        |                       |      |           |                      |      |           |
| Agents acting on the renin-angiotensin system         | 32.6                  | 32.2 | 0.01      | 32.5                 | 32.9 | -0.01     |
| Antibacterials for systemic use                       | 50.4                  | 48.5 | 0.04      | 50.1                 | 47.8 | 0.04      |
| Antidepressants                                       | 53.7                  | 53.0 | 0.01      | 53.5                 | 53.0 | 0.01      |
| Antiepileptics                                        | 43.0                  | 41.7 | 0.02      | 42.7                 | 42.3 | 0.01      |
| Antiinflammatory and antirheumatic products           | 58.2                  | 60.0 | -0.04     | 58.4                 | 59.8 | -0.03     |
| Antineoplastic agents                                 | 30.7                  | 41.0 | -0.22     | 33.9                 | 32.0 | 0.04      |
| Antipsoriatics                                        | 0.8                   | 0.7  | 0.01      | 0.8                  | 0.6  | 0.03      |
| Antithrombotic agents                                 | 18.8                  | 17.0 | 0.05      | 18.5                 | 17.9 | 0.02      |
| Beta blocking agents                                  | 24.9                  | 22.9 | 0.05      | 24.4                 | 23.3 | 0.03      |
| Calcium channel blockers                              | 20.0                  | 19.2 | 0.02      | 19.7                 | 20.4 | -0.02     |
| Diuretics                                             | 33.7                  | 32.1 | 0.04      | 33.3                 | 32.7 | 0.02      |
| Drugs for acid related disorders                      | 50.0                  | 51.2 | -0.02     | 50.3                 | 48.0 | 0.05      |
| Drugs for obstructive airway diseases                 | 46.2                  | 46.9 | -0.01     | 46.2                 | 46.5 | -0.01     |
| Drugs used in diabetes                                | 18.5                  | 19.6 | -0.03     | 18.4                 | 19.1 | -0.02     |
| Immunosuppressants                                    | 39.8                  | 56.0 | -0.33     | 44.4                 | 41.8 | 0.05      |
| Lipid modifying agents                                | 29.2                  | 30.0 | -0.02     | 29.3                 | 30.9 | -0.04     |
| Opioids                                               | 62.1                  | 62.6 | -0.01     | 62.0                 | 62.7 | -0.01     |
| Psycholeptics                                         | 49.8                  | 49.5 | 0.00      | 49.3                 | 50.0 | -0.01     |
| Psychostimulants, agents used for adhd and nootropics | 7.4                   | 6.7  | 0.02      | 7.2                  | 6.9  | 0.01      |

## S6.1.10. MDCR

| Characteristic                           | Before stratification |      |           | After stratification |      |           |
|------------------------------------------|-----------------------|------|-----------|----------------------|------|-----------|
|                                          | HCQ                   | SSZ  |           | HCQ                  | SSZ  |           |
|                                          | %                     | %    | Std. diff | %                    | %    | Std. diff |
| Age group                                |                       |      |           |                      |      |           |
| 45-49                                    | 0.1                   | <0.1 | 0.01      | 0.1                  | <0.1 | 0.01      |
| 55-59                                    | 0.7                   | 1.0  | -0.03     | 0.8                  | 0.8  | -0.01     |
| 60-64                                    | 1.7                   | 2.1  | -0.03     | 1.8                  | 2.0  | -0.02     |
| 65-69                                    | 23.7                  | 26.3 | -0.06     | 24.4                 | 24.4 | 0.00      |
| 70-74                                    | 28.1                  | 30.9 | -0.06     | 28.6                 | 28.8 | 0.00      |
| 75-79                                    | 22.6                  | 20.6 | 0.05      | 22.2                 | 21.9 | 0.01      |
| 80-84                                    | 14.6                  | 13.2 | 0.04      | 14.3                 | 14.2 | 0.00      |
| 90-94                                    | 1.3                   | 1.2  | 0.02      | 1.3                  | 1.3  | 0.00      |
| 95-99                                    | 0.1                   | 0.1  | 0.01      | 0.1                  | 0.1  | 0.01      |
| Gender: female                           | 72.9                  | 68.6 | 0.10      | 71.8                 | 71.5 | 0.00      |
| Medical history: General                 |                       |      |           |                      |      |           |
| Acute respiratory disease                | 27.5                  | 26.4 | 0.02      | 27.4                 | 27.2 | 0.00      |
| Attention deficit hyperactivity disorder | 0.2                   | 0.2  | 0.00      | 0.2                  | 0.2  | 0.00      |
| Chronic liver disease                    | 2.1                   | 1.9  | 0.02      | 2.1                  | 1.8  | 0.02      |
| Chronic obstructive lung disease         | 15.8                  | 16.0 | -0.01     | 15.7                 | 16.0 | -0.01     |
| Crohn's disease                          | 0.5                   | 1.3  | -0.08     | 0.6                  | 1.1  | -0.05     |
| Dementia                                 | 2.0                   | 1.7  | 0.03      | 2.0                  | 1.8  | 0.01      |
| Depressive disorder                      | 9.2                   | 9.2  | 0.00      | 9.2                  | 9.2  | 0.00      |
| Diabetes mellitus                        | 23.1                  | 22.6 | 0.01      | 22.9                 | 22.7 | 0.00      |
| Gastroesophageal reflux disease          | 16.5                  | 16.6 | 0.00      | 16.2                 | 16.5 | -0.01     |
| Gastrointestinal hemorrhage              | 4.8                   | 5.1  | -0.01     | 4.8                  | 4.9  | -0.01     |
| Human immunodeficiency virus infection   | 0.1                   | <0.1 | 0.01      | 0.1                  | <0.1 | 0.01      |
| Hyperlipidemia                           | 41.3                  | 39.2 | 0.04      | 40.7                 | 41.3 | -0.01     |
| Hypertensive disorder                    | 61.8                  | 59.3 | 0.05      | 61.1                 | 61.3 | 0.00      |
| Lesion of liver                          | 1.0                   | 1.0  | -0.01     | 1.0                  | 1.0  | -0.01     |
| Obesity                                  | 5.6                   | 5.4  | 0.01      | 5.5                  | 5.4  | 0.01      |
| Osteoarthritis                           | 62.0                  | 59.5 | 0.05      | 61.2                 | 61.9 | -0.01     |
| Pneumonia                                | 9.2                   | 9.2  | 0.00      | 9.2                  | 9.1  | 0.00      |
| Psoriasis                                | 2.3                   | 4.9  | -0.14     | 2.7                  | 3.3  | -0.04     |
| Renal impairment                         | 11.3                  | 10.5 | 0.03      | 11.1                 | 11.2 | 0.00      |
| Rheumatoid arthritis                     | 88.4                  | 89.7 | -0.04     | 88.9                 | 89.3 | -0.02     |
| Schizophrenia                            | 0.1                   | <0.1 | 0.00      | 0.1                  | 0.1  | -0.01     |
| Ulcerative colitis                       | 0.6                   | 2.0  | -0.12     | 0.7                  | 1.2  | -0.05     |
| Urinary tract infectious disease         | 13.6                  | 12.7 | 0.03      | 13.5                 | 12.7 | 0.02      |
| Viral hepatitis C                        | 0.5                   | 0.6  | -0.01     | 0.5                  | 0.5  | 0.00      |
| Visual system disorder                   | 55.3                  | 55.4 | 0.00      | 55.3                 | 55.1 | 0.00      |
| Medical history: Cardiovascular disease  |                       |      |           |                      |      |           |
| Atrial fibrillation                      | 10.6                  | 9.5  | 0.04      | 10.4                 | 10.2 | 0.01      |
| Heart failure                            | 10.1                  | 9.9  | 0.01      | 10.0                 | 10.4 | -0.01     |
| Ischemic heart disease                   | 10.1                  | 10.1 | 0.00      | 10.1                 | 10.4 | -0.01     |
| Peripheral vascular disease              | 6.4                   | 5.5  | 0.04      | 6.3                  | 6.0  | 0.01      |
| Pulmonary embolism                       | 1.5                   | 1.3  | 0.02      | 1.5                  | 1.3  | 0.02      |
| Venous thrombosis                        | 3.4                   | 3.4  | 0.00      | 3.3                  | 3.6  | -0.01     |
| Medical history: Neoplasms               |                       |      |           |                      |      |           |
| Hematologic neoplasm                     | 2.2                   | 2.3  | 0.00      | 2.2                  | 2.4  | -0.01     |
| Malignant lymphoma                       | 1.3                   | 1.5  | -0.02     | 1.3                  | 1.4  | -0.01     |
| Malignant neoplasm of anorectum          | 0.4                   | 0.4  | 0.00      | 0.4                  | 0.4  | 0.00      |
| Malignant neoplastic disease             | 18.5                  | 19.8 | -0.03     | 18.7                 | 19.0 | -0.01     |
| Malignant tumor of breast                | 3.8                   | 4.0  | -0.01     | 3.8                  | 3.8  | 0.00      |
| Malignant tumor of colon                 | 0.8                   | 0.7  | 0.02      | 0.9                  | 0.7  | 0.02      |
| Malignant tumor of lung                  | 0.7                   | 0.6  | 0.00      | 0.7                  | 0.5  | 0.02      |
| Malignant tumor of urinary bladder       | 1.0                   | 1.1  | -0.02     | 1.0                  | 0.9  | 0.00      |
| Primary malignant neoplasm of prostate   | 2.4                   | 2.8  | -0.02     | 2.5                  | 2.4  | 0.01      |
| Medication use                           |                       |      |           |                      |      |           |
| Antibacterials for systemic use          | 46.3                  | 49.0 | -0.05     | 47.0                 | 46.3 | 0.01      |
| Antidepressants                          | 31.5                  | 31.4 | 0.00      | 31.7                 | 31.3 | 0.01      |

## Risk of hydroxychloroquine with azithromycin

| Characteristic                                        | Before stratification |      |           | After stratification |      |           |
|-------------------------------------------------------|-----------------------|------|-----------|----------------------|------|-----------|
|                                                       | HCQ                   | SSZ  |           | HCQ                  | SSZ  |           |
|                                                       | %                     | %    | Std. diff | %                    | %    | Std. diff |
| Antiepileptics                                        | 20.1                  | 21.8 | -0.04     | 20.3                 | 20.6 | -0.01     |
| Antiinflammatory and antirheumatic products           | 44.0                  | 44.4 | -0.01     | 44.1                 | 44.8 | -0.02     |
| Antineoplastic agents                                 | 32.1                  | 40.3 | -0.17     | 34.8                 | 33.3 | 0.03      |
| Antipsoriatics                                        | 1.0                   | 1.4  | -0.03     | 1.0                  | 1.3  | -0.02     |
| Antithrombotic agents                                 | 22.8                  | 22.1 | 0.02      | 22.6                 | 22.5 | 0.00      |
| Beta blocking agents                                  | 39.4                  | 39.3 | 0.00      | 39.3                 | 39.2 | 0.00      |
| Calcium channel blockers                              | 30.0                  | 28.6 | 0.03      | 29.6                 | 30.3 | -0.02     |
| Diuretics                                             | 47.1                  | 45.2 | 0.04      | 46.7                 | 46.2 | 0.01      |
| Drugs for acid related disorders                      | 44.6                  | 45.6 | -0.02     | 44.7                 | 45.1 | -0.01     |
| Drugs for obstructive airway diseases                 | 33.2                  | 32.4 | 0.02      | 33.2                 | 32.8 | 0.01      |
| Drugs used in diabetes                                | 17.4                  | 16.9 | 0.01      | 17.3                 | 16.9 | 0.01      |
| Immunosuppressants                                    | 41.2                  | 54.9 | -0.28     | 45.5                 | 42.8 | 0.05      |
| Lipid modifying agents                                | 49.8                  | 48.5 | 0.03      | 49.5                 | 49.4 | 0.00      |
| Opioids                                               | 43.6                  | 44.0 | -0.01     | 43.8                 | 43.2 | 0.01      |
| Psycholeptics                                         | 34.6                  | 34.1 | 0.01      | 34.5                 | 33.6 | 0.02      |
| Psychostimulants, agents used for adhd and nootropics | 2.0                   | 2.0  | 0.00      | 2.0                  | 1.9  | 0.01      |

## S6.1.11. OpenClaims

| Characteristic                                | Before stratification |      |           | After stratification |      |           |
|-----------------------------------------------|-----------------------|------|-----------|----------------------|------|-----------|
|                                               | HCQ                   | SSZ  |           | HCQ                  | SSZ  |           |
|                                               | %                     | %    | Std. diff | %                    | %    | Std. diff |
| Age group                                     |                       |      |           |                      |      |           |
| 15-19                                         | 0.3                   | 0.3  | -0.01     | 0.3                  | 0.3  | 0.00      |
| 20-24                                         | 1.2                   | 1.2  | -0.01     | 1.2                  | 1.2  | 0.00      |
| 25-29                                         | 1.9                   | 1.9  | 0.00      | 1.9                  | 1.8  | 0.00      |
| 30-34                                         | 3.0                   | 2.9  | 0.00      | 2.9                  | 2.9  | 0.00      |
| 35-39                                         | 4.3                   | 4.4  | -0.01     | 4.3                  | 4.3  | 0.00      |
| 40-44                                         | 5.8                   | 5.9  | 0.00      | 5.8                  | 5.7  | 0.00      |
| 45-49                                         | 8.3                   | 8.3  | 0.00      | 8.2                  | 8.1  | 0.00      |
| 50-54                                         | 11.5                  | 11.9 | -0.01     | 11.5                 | 11.5 | 0.00      |
| 55-59                                         | 13.6                  | 14.2 | -0.02     | 13.7                 | 13.8 | 0.00      |
| 60-64                                         | 13.4                  | 13.8 | -0.01     | 13.6                 | 13.5 | 0.00      |
| 70-74                                         | 9.9                   | 9.6  | 0.01      | 9.9                  | 10.0 | 0.00      |
| 75-79                                         | 10.7                  | 9.0  | 0.06      | 10.3                 | 10.6 | -0.01     |
| 80-84                                         | 3.7                   | 3.5  | 0.01      | 3.6                  | 3.6  | 0.00      |
| 85-89                                         | 0.2                   | 0.2  | 0.00      | 0.2                  | 0.2  | 0.00      |
| Gender: female                                | 81.0                  | 73.5 | 0.18      | 79.3                 | 79.1 | 0.00      |
| Medical history: General                      |                       |      |           |                      |      |           |
| Acute respiratory disease                     | 20.1                  | 19.2 | 0.02      | 19.9                 | 19.9 | 0.00      |
| Chronic liver disease                         | 2.1                   | 2.0  | 0.00      | 2.0                  | 2.1  | 0.00      |
| Chronic obstructive lung disease              | 7.6                   | 7.7  | 0.00      | 7.6                  | 7.8  | 0.00      |
| Crohn's disease                               | 0.4                   | 1.6  | -0.11     | 0.5                  | 0.9  | -0.04     |
| Dementia                                      | 0.8                   | 0.7  | 0.01      | 0.8                  | 0.8  | 0.00      |
| Depressive disorder                           | 9.7                   | 9.6  | 0.00      | 9.6                  | 9.8  | -0.01     |
| Diabetes mellitus                             | 15.6                  | 16.1 | -0.01     | 15.7                 | 16.0 | -0.01     |
| Gastrointestinal hemorrhage                   | 2.4                   | 2.5  | -0.01     | 2.4                  | 2.4  | 0.00      |
| Hyperlipidemia                                | 26.0                  | 25.8 | 0.01      | 26.0                 | 26.4 | -0.01     |
| Hypertensive disorder                         | 35.0                  | 34.5 | 0.01      | 34.9                 | 35.2 | -0.01     |
| Lesion of liver                               | 0.8                   | 0.7  | 0.01      | 0.8                  | 0.8  | 0.00      |
| Obesity                                       | 6.3                   | 6.6  | -0.01     | 6.4                  | 6.5  | 0.00      |
| Osteoarthritis                                | 36.0                  | 37.0 | -0.02     | 36.1                 | 36.8 | -0.02     |
| Psoriasis                                     | 1.9                   | 5.4  | -0.19     | 2.2                  | 3.3  | -0.06     |
| Renal impairment                              | 6.2                   | 5.5  | 0.03      | 6.1                  | 6.0  | 0.00      |
| Rheumatoid arthritis                          | 69.0                  | 69.6 | -0.01     | 69.3                 | 69.8 | -0.01     |
| Schizophrenia                                 | 0.2                   | 0.2  | 0.00      | 0.2                  | 0.2  | 0.00      |
| Ulcerative colitis                            | 0.4                   | 1.7  | -0.12     | 0.5                  | 1.0  | -0.06     |
| Viral hepatitis C                             | 1.1                   | 1.1  | 0.00      | 1.1                  | 1.1  | 0.00      |
| Visual system disorder                        | 21.9                  | 20.7 | 0.03      | 21.6                 | 21.6 | 0.00      |
| Medical history: Cardiovascular disease       |                       |      |           |                      |      |           |
| Atrial fibrillation                           | 3.6                   | 3.4  | 0.01      | 3.6                  | 3.6  | 0.00      |
| Cerebrovascular disease                       | 3.4                   | 2.8  | 0.03      | 3.2                  | 3.3  | 0.00      |
| Coronary arteriosclerosis                     | 6.8                   | 6.8  | 0.00      | 6.8                  | 6.9  | 0.00      |
| Heart disease                                 | 18.3                  | 17.3 | 0.03      | 18.1                 | 18.3 | 0.00      |
| Heart failure                                 | 4.0                   | 3.7  | 0.02      | 3.9                  | 4.0  | 0.00      |
| Ischemic heart disease                        | 3.5                   | 3.4  | 0.01      | 3.5                  | 3.6  | 0.00      |
| Peripheral vascular disease                   | 9.7                   | 9.1  | 0.02      | 9.6                  | 9.6  | 0.00      |
| Venous thrombosis                             | 1.5                   | 1.4  | 0.01      | 1.5                  | 1.5  | 0.00      |
| Medical history: Neoplasms                    |                       |      |           |                      |      |           |
| Hematologic neoplasm                          | 0.9                   | 0.9  | 0.00      | 0.9                  | 1.0  | 0.00      |
| Malignant neoplasm of anorectum               | 0.1                   | 0.1  | 0.00      | 0.1                  | 0.1  | 0.00      |
| Malignant neoplastic disease                  | 7.2                   | 7.2  | 0.00      | 7.2                  | 7.3  | 0.00      |
| Malignant tumor of breast                     | 1.8                   | 1.6  | 0.01      | 1.7                  | 1.7  | 0.00      |
| Malignant tumor of lung                       | 0.3                   | 0.3  | 0.00      | 0.3                  | 0.3  | 0.00      |
| Malignant tumor of urinary bladder            | 0.2                   | 0.3  | -0.01     | 0.3                  | 0.3  | 0.00      |
| Medication use                                |                       |      |           |                      |      |           |
| Agents acting on the renin-angiotensin system | 30.8                  | 33.0 | -0.05     | 31.4                 | 31.4 | 0.00      |
| Antibacterials for systemic use               | 36.1                  | 38.8 | -0.06     | 36.8                 | 36.6 | 0.00      |
| Antidepressants                               | 34.5                  | 35.7 | -0.03     | 34.7                 | 34.8 | 0.00      |

## Risk of hydroxychloroquine with azithromycin

| Characteristic                                        | Before stratification |      |           | After stratification |      |           |
|-------------------------------------------------------|-----------------------|------|-----------|----------------------|------|-----------|
|                                                       | HCQ                   | SSZ  |           | HCQ                  | SSZ  |           |
|                                                       | %                     | %    | Std. diff | %                    | %    | Std. diff |
| Antiepileptics                                        | 24.0                  | 26.4 | -0.05     | 24.5                 | 24.6 | 0.00      |
| Antiinflammatory and antirheumatic products           | 41.0                  | 45.2 | -0.08     | 42.0                 | 41.9 | 0.00      |
| Antineoplastic agents                                 | 31.6                  | 38.0 | -0.14     | 33.3                 | 33.4 | 0.00      |
| Antipsoriatics                                        | 0.7                   | 1.0  | -0.03     | 0.8                  | 0.9  | -0.01     |
| Beta blocking agents                                  | 23.1                  | 24.1 | -0.02     | 23.3                 | 23.5 | 0.00      |
| Drugs used in diabetes                                | 14.0                  | 15.4 | -0.04     | 14.3                 | 14.6 | -0.01     |
| Immunosuppressants                                    | 41.9                  | 53.4 | -0.23     | 44.7                 | 44.7 | 0.00      |
| Lipid modifying agents                                | 29.0                  | 31.5 | -0.05     | 29.6                 | 29.8 | 0.00      |
| Opioids                                               | 34.8                  | 37.8 | -0.06     | 35.4                 | 35.5 | 0.00      |
| Psycholeptics                                         | 29.5                  | 30.8 | -0.03     | 29.7                 | 29.9 | 0.00      |
| Psychostimulants, agents used for adhd and nootropics | 4.5                   | 4.8  | -0.01     | 4.5                  | 4.6  | 0.00      |

## S6.1.12. OptumEHR

| Characteristic                           | Before stratification |      |           | After stratification |      |           |
|------------------------------------------|-----------------------|------|-----------|----------------------|------|-----------|
|                                          | HCQ                   | SSZ  |           | HCQ                  | SSZ  |           |
|                                          | %                     | %    | Std. diff | %                    | %    | Std. diff |
| Age group                                |                       |      |           |                      |      |           |
| 15-19                                    | 0.2                   | 0.3  | -0.02     | 0.2                  | 0.3  | -0.01     |
| 20-24                                    | 1.0                   | 1.0  | 0.00      | 1.0                  | 1.0  | 0.00      |
| 25-29                                    | 1.8                   | 1.9  | -0.01     | 1.8                  | 1.9  | -0.01     |
| 30-34                                    | 3.1                   | 3.0  | 0.00      | 3.1                  | 3.0  | 0.00      |
| 35-39                                    | 4.2                   | 4.6  | -0.02     | 4.2                  | 4.2  | 0.00      |
| 40-44                                    | 5.9                   | 5.8  | 0.01      | 5.9                  | 5.6  | 0.01      |
| 45-49                                    | 7.9                   | 8.2  | -0.01     | 7.9                  | 7.9  | 0.00      |
| 50-54                                    | 11.5                  | 11.9 | -0.01     | 11.6                 | 11.5 | 0.00      |
| 55-59                                    | 13.8                  | 14.7 | -0.03     | 14.0                 | 14.3 | -0.01     |
| 60-64                                    | 13.3                  | 13.9 | -0.02     | 13.5                 | 13.4 | 0.00      |
| 65-69                                    | 12.1                  | 12.7 | -0.02     | 12.3                 | 12.6 | -0.01     |
| 70-74                                    | 10.1                  | 9.6  | 0.02      | 10.0                 | 9.9  | 0.00      |
| 75-79                                    | 8.1                   | 6.9  | 0.04      | 7.8                  | 7.9  | 0.00      |
| 80-84                                    | 5.5                   | 4.2  | 0.06      | 5.2                  | 5.3  | -0.01     |
| 85-89                                    | 1.6                   | 1.2  | 0.03      | 1.5                  | 1.4  | 0.00      |
| Gender: female                           | 80.1                  | 72.4 | 0.18      | 78.2                 | 78.6 | -0.01     |
| Race                                     |                       |      |           |                      |      |           |
| race = Asian                             | 1.5                   | 1.1  | 0.04      | 1.5                  | 1.4  | 0.01      |
| race = Black or African American         | 10.1                  | 8.4  | 0.06      | 9.7                  | 9.6  | 0.00      |
| race = White                             | 81.4                  | 83.3 | -0.05     | 81.8                 | 81.9 | 0.00      |
| Ethnicity                                |                       |      |           |                      |      |           |
| ethnicity = Hispanic or Latino           | 5.3                   | 6.1  | -0.04     | 5.4                  | 5.4  | 0.00      |
| Medical history: General                 |                       |      |           |                      |      |           |
| Acute respiratory disease                | 17.9                  | 18.3 | -0.01     | 17.9                 | 18.1 | 0.00      |
| Attention deficit hyperactivity disorder | 1.0                   | 0.8  | 0.01      | 0.9                  | 0.8  | 0.01      |
| Chronic liver disease                    | 2.7                   | 3.0  | -0.02     | 2.8                  | 2.9  | -0.01     |
| Chronic obstructive lung disease         | 8.5                   | 9.2  | -0.03     | 8.6                  | 8.9  | -0.01     |
| Crohn's disease                          | 0.5                   | 1.6  | -0.12     | 0.6                  | 0.9  | -0.04     |
| Dementia                                 | 1.1                   | 0.9  | 0.02      | 1.0                  | 1.1  | -0.01     |
| Depressive disorder                      | 15.7                  | 15.4 | 0.01      | 15.6                 | 15.7 | 0.00      |
| Diabetes mellitus                        | 14.9                  | 15.0 | 0.00      | 15.0                 | 15.3 | -0.01     |
| Gastroesophageal reflux disease          | 18.4                  | 18.1 | 0.01      | 18.3                 | 18.1 | 0.00      |
| Gastrointestinal hemorrhage              | 2.1                   | 2.4  | -0.02     | 2.1                  | 2.2  | 0.00      |
| Human immunodeficiency virus infection   | 0.1                   | 0.2  | -0.01     | 0.1                  | 0.2  | -0.01     |
| Hyperlipidemia                           | 30.4                  | 31.1 | -0.02     | 30.5                 | 30.6 | 0.00      |
| Hypertensive disorder                    | 38.9                  | 38.6 | 0.01      | 38.8                 | 39.2 | -0.01     |
| Lesion of liver                          | 1.1                   | 0.9  | 0.02      | 1.0                  | 1.0  | 0.01      |
| Obesity                                  | 11.3                  | 12.1 | -0.03     | 11.4                 | 11.6 | -0.01     |
| Osteoarthritis                           | 35.1                  | 36.2 | -0.02     | 35.3                 | 35.7 | -0.01     |
| Pneumonia                                | 5.0                   | 5.1  | 0.00      | 5.0                  | 5.0  | 0.00      |
| Psoriasis                                | 1.7                   | 4.4  | -0.16     | 2.1                  | 2.7  | -0.04     |
| Renal impairment                         | 7.7                   | 6.7  | 0.04      | 7.4                  | 7.7  | -0.01     |
| Rheumatoid arthritis                     | 84.8                  | 84.7 | 0.00      | 84.9                 | 85.5 | -0.02     |
| Ulcerative colitis                       | 0.4                   | 1.5  | -0.11     | 0.5                  | 0.8  | -0.04     |
| Urinary tract infectious disease         | 7.6                   | 6.3  | 0.05      | 7.2                  | 7.1  | 0.00      |
| Viral hepatitis C                        | 1.2                   | 1.5  | -0.02     | 1.3                  | 1.4  | -0.01     |
| Visual system disorder                   | 13.8                  | 13.6 | 0.00      | 13.7                 | 13.4 | 0.01      |
| Medical history: Cardiovascular disease  |                       |      |           |                      |      |           |
| Coronary arteriosclerosis                | 8.3                   | 8.5  | 0.00      | 8.3                  | 8.5  | -0.01     |
| Heart disease                            | 20.9                  | 20.2 | 0.02      | 20.7                 | 21.1 | -0.01     |
| Heart failure                            | 4.7                   | 4.4  | 0.02      | 4.7                  | 4.9  | -0.01     |
| Ischemic heart disease                   | 4.4                   | 4.5  | 0.00      | 4.4                  | 4.5  | 0.00      |
| Peripheral vascular disease              | 2.6                   | 2.4  | 0.01      | 2.6                  | 2.5  | 0.00      |
| Pulmonary embolism                       | 1.0                   | 1.0  | 0.00      | 1.0                  | 1.0  | -0.01     |
| Venous thrombosis                        | 1.9                   | 2.0  | -0.01     | 1.9                  | 2.0  | -0.01     |
| Medical history: Neoplasms               |                       |      |           |                      |      |           |



Risk of hydroxychloroquine with azithromycin

| Characteristic                                        | Before stratification |      |           | After stratification |      |           |
|-------------------------------------------------------|-----------------------|------|-----------|----------------------|------|-----------|
|                                                       | HCQ                   | SSZ  |           | HCQ                  | SSZ  |           |
|                                                       | %                     | %    | Std. diff | %                    | %    | Std. diff |
| Hematologic neoplasm                                  | 1.1                   | 1.2  | -0.01     | 1.1                  | 1.2  | -0.01     |
| Malignant lymphoma                                    | 0.6                   | 0.7  | -0.01     | 0.6                  | 0.7  | 0.00      |
| Malignant neoplasm of anorectum                       | 0.2                   | 0.2  | 0.01      | 0.2                  | 0.2  | 0.01      |
| Malignant neoplastic disease                          | 8.5                   | 8.8  | -0.01     | 8.5                  | 8.8  | -0.01     |
| Malignant tumor of breast                             | 1.9                   | 1.7  | 0.02      | 1.9                  | 1.9  | 0.00      |
| Malignant tumor of colon                              | 0.4                   | 0.3  | 0.00      | 0.4                  | 0.4  | 0.00      |
| Malignant tumor of lung                               | 0.4                   | 0.4  | -0.01     | 0.4                  | 0.4  | -0.01     |
| Malignant tumor of urinary bladder                    | 0.2                   | 0.4  | -0.03     | 0.2                  | 0.3  | -0.02     |
| Primary malignant neoplasm of prostate                | 0.6                   | 0.8  | -0.03     | 0.7                  | 0.7  | 0.00      |
| Medication use                                        |                       |      |           |                      |      |           |
| Agents acting on the renin-angiotensin system         | 30.6                  | 31.6 | -0.02     | 30.8                 | 31.3 | -0.01     |
| Antibacterials for systemic use                       | 28.1                  | 29.8 | -0.04     | 28.3                 | 28.2 | 0.00      |
| Antidepressants                                       | 36.0                  | 35.6 | 0.01      | 35.8                 | 36.3 | -0.01     |
| Antiepileptics                                        | 24.0                  | 24.8 | -0.02     | 24.2                 | 24.4 | -0.01     |
| Antiinflammatory and antirheumatic products           | 43.7                  | 47.2 | -0.07     | 44.5                 | 44.6 | 0.00      |
| Antineoplastic agents                                 | 34.4                  | 38.1 | -0.08     | 35.4                 | 36.4 | -0.02     |
| Antipsoriatics                                        | 0.6                   | 0.7  | -0.01     | 0.6                  | 0.6  | 0.00      |
| Antithrombotic agents                                 | 33.0                  | 31.7 | 0.03      | 32.6                 | 33.2 | -0.01     |
| Beta blocking agents                                  | 26.7                  | 27.0 | -0.01     | 26.8                 | 27.2 | -0.01     |
| Calcium channel blockers                              | 17.2                  | 16.7 | 0.01      | 17.1                 | 17.5 | -0.01     |
| Diuretics                                             | 29.2                  | 28.3 | 0.02      | 29.1                 | 29.4 | -0.01     |
| Drugs for acid related disorders                      | 45.1                  | 45.5 | -0.01     | 45.1                 | 45.4 | 0.00      |
| Drugs for obstructive airway diseases                 | 34.5                  | 35.2 | -0.02     | 34.6                 | 35.0 | -0.01     |
| Drugs used in diabetes                                | 15.1                  | 15.7 | -0.02     | 15.3                 | 15.8 | -0.01     |
| Immunosuppressants                                    | 47.1                  | 56.1 | -0.18     | 49.2                 | 50.2 | -0.02     |
| Lipid modifying agents                                | 30.2                  | 31.7 | -0.03     | 30.6                 | 31.0 | -0.01     |
| Opioids                                               | 39.3                  | 41.1 | -0.04     | 39.6                 | 40.3 | -0.01     |
| Psycholeptics                                         | 35.2                  | 35.0 | 0.00      | 35.1                 | 35.5 | -0.01     |
| Psychostimulants, agents used for adhd and nootropics | 4.3                   | 4.0  | 0.01      | 4.2                  | 4.1  | 0.01      |

## S6.1.13. SIDIAP

| Characteristic                                | Before stratification |      |           | After stratification |      |           |
|-----------------------------------------------|-----------------------|------|-----------|----------------------|------|-----------|
|                                               | HCQ                   | SSZ  |           | HCQ                  | SSZ  |           |
|                                               | %                     | %    | Std. diff | %                    | %    | Std. diff |
| Age group                                     |                       |      |           |                      |      |           |
| 20-24                                         | 0.6                   | <1.3 | -0.02     | 0.6                  | <1.0 | -0.02     |
| 25-29                                         | 2.2                   | 2.9  | -0.05     | 2.0                  | 4.6  | -0.15     |
| 30-34                                         | 4.4                   | 4.7  | -0.02     | 4.6                  | 4.3  | 0.01      |
| 35-39                                         | 7.1                   | 9.7  | -0.09     | 7.2                  | 13.3 | -0.20     |
| 40-44                                         | 8.0                   | 6.8  | 0.05      | 8.3                  | 5.6  | 0.11      |
| 45-49                                         | 7.5                   | 9.4  | -0.07     | 7.4                  | 7.3  | 0.00      |
| 50-54                                         | 10.1                  | 12.3 | -0.07     | 10.5                 | 7.7  | 0.10      |
| 55-59                                         | 11.5                  | 9.4  | 0.07      | 11.5                 | 9.5  | 0.06      |
| 60-64                                         | 11.2                  | 10.8 | 0.02      | 10.9                 | 11.1 | -0.01     |
| 65-69                                         | 10.8                  | 10.2 | 0.02      | 11.1                 | 8.7  | 0.08      |
| 70-74                                         | 9.9                   | 6.8  | 0.11      | 9.6                  | 9.6  | 0.00      |
| 75-79                                         | 7.5                   | 9.4  | -0.07     | 7.6                  | 9.1  | -0.05     |
| 80-84                                         | 6.2                   | 5.8  | 0.02      | 6.0                  | 8.0  | -0.08     |
| 85-89                                         | 2.0                   | <1.3 | 0.13      | 2.0                  | <1.0 | 0.16      |
| 90-94                                         | 0.6                   | <1.3 | 0.06      | 0.6                  | <1.0 | 0.06      |
| Gender: female                                | 79.2                  | 66.7 | 0.29      | 75.9                 | 79.8 | -0.09     |
| Medical history: General                      |                       |      |           |                      |      |           |
| Acute respiratory disease                     | 17.9                  | 17.3 | 0.02      | 17.4                 | 26.6 | -0.22     |
| Chronic liver disease                         | 1.0                   | <1.3 | -0.01     | 1.0                  | <1.0 | 0.04      |
| Chronic obstructive lung disease              | 2.6                   | 2.6  | 0.00      | 2.4                  | 1.7  | 0.05      |
| Depressive disorder                           | 3.0                   | 4.7  | -0.09     | 3.1                  | 9.0  | -0.25     |
| Diabetes mellitus                             | 2.9                   | 3.1  | -0.02     | 2.8                  | 2.3  | 0.03      |
| Gastroesophageal reflux disease               | 1.0                   | 1.3  | -0.02     | 1.1                  | 1.5  | -0.04     |
| Gastrointestinal hemorrhage                   | 2.7                   | 3.7  | -0.05     | 2.9                  | 3.6  | -0.04     |
| Hyperlipidemia                                | 4.3                   | 3.4  | 0.04      | 4.0                  | 7.8  | -0.16     |
| Hypertensive disorder                         | 5.3                   | 6.6  | -0.05     | 5.7                  | 7.9  | -0.09     |
| Obesity                                       | 4.8                   | 4.2  | 0.03      | 4.6                  | 3.3  | 0.07      |
| Osteoarthritis                                | 3.0                   | 3.1  | -0.01     | 3.2                  | 4.9  | -0.09     |
| Pneumonia                                     | 2.0                   | 2.4  | -0.02     | 2.2                  | 7.3  | -0.24     |
| Psoriasis                                     | 0.7                   | 2.1  | -0.12     | 0.6                  | 2.0  | -0.12     |
| Renal impairment                              | 1.8                   | 2.4  | -0.04     | 2.0                  | 2.1  | -0.01     |
| Rheumatoid arthritis                          | 35.6                  | 26.5 | 0.20      | 33.2                 | 42.3 | -0.19     |
| Urinary tract infectious disease              | 7.5                   | 5.8  | 0.07      | 7.4                  | 6.0  | 0.06      |
| Viral hepatitis C                             | 0.9                   | <1.3 | 0.04      | 0.9                  | <1.0 | 0.07      |
| Visual system disorder                        | 16.0                  | 17.3 | -0.03     | 15.6                 | 19.5 | -0.10     |
| Medical history: Cardiovascular disease       |                       |      |           |                      |      |           |
| Atrial fibrillation                           | 0.6                   | 1.3  | -0.08     | 0.5                  | 4.1  | -0.24     |
| Cerebrovascular disease                       | 2.2                   | <1.3 | 0.09      | 2.2                  | <1.0 | 0.13      |
| Heart disease                                 | 7.2                   | 6.8  | 0.02      | 7.0                  | 9.2  | -0.08     |
| Heart failure                                 | 1.1                   | <1.3 | 0.01      | 1.1                  | 3.3  | -0.15     |
| Ischemic heart disease                        | 1.6                   | <1.3 | 0.10      | 1.5                  | <1.0 | 0.13      |
| Peripheral vascular disease                   | 3.6                   | 2.4  | 0.07      | 3.8                  | 1.7  | 0.13      |
| Pulmonary embolism                            | 0.4                   | <1.3 | 0.02      | 0.4                  | <1.0 | 0.04      |
| Medical history: Neoplasms                    |                       |      |           |                      |      |           |
| Hematologic neoplasm                          | <0.4                  | <1.3 | -0.08     | <0.4                 | <1.0 | -0.06     |
| Malignant neoplastic disease                  | 3.0                   | 3.4  | -0.02     | 3.0                  | 2.4  | 0.04      |
| Malignant tumor of breast                     | 0.4                   | <1.3 | -0.02     | <0.4                 | <1.0 | -0.02     |
| Malignant tumor of colon                      | <0.4                  | <1.3 | 0.01      | <0.4                 | <1.0 | 0.04      |
| Malignant tumor of lung                       | <0.4                  | <1.3 | -0.04     | <0.4                 | <1.0 | -0.03     |
| Malignant tumor of urinary bladder            | <0.4                  | <1.3 | -0.05     | <0.4                 | <1.0 | -0.02     |
| Medication use                                |                       |      |           |                      |      |           |
| Agents acting on the renin-angiotensin system | 26.2                  | 30.7 | -0.10     | 27.2                 | 27.0 | 0.00      |
| Antibacterials for systemic use               | 17.4                  | 17.8 | -0.01     | 17.1                 | 19.2 | -0.05     |
| Antidepressants                               | 21.9                  | 22.8 | -0.02     | 21.9                 | 27.7 | -0.13     |
| Antiepileptics                                | 9.9                   | 11.8 | -0.06     | 9.9                  | 11.9 | -0.06     |
| Antiinflammatory and antirheumatic products   | 70.0                  | 71.7 | -0.04     | 69.8                 | 68.2 | 0.03      |

## Risk of hydroxychloroquine with azithromycin

| Characteristic                                        | Before stratification |      |           | After stratification |      |           |
|-------------------------------------------------------|-----------------------|------|-----------|----------------------|------|-----------|
|                                                       | HCQ                   | SSZ  |           | HCQ                  | SSZ  |           |
|                                                       | %                     | %    | Std. diff | %                    | %    | Std. diff |
| Antineoplastic agents                                 | 21.3                  | 21.0 | 0.01      | 21.3                 | 20.6 | 0.02      |
| Antipsoriatics                                        | 1.3                   | 1.6  | -0.02     | 1.4                  | <1.0 | 0.04      |
| Antithrombotic agents                                 | 17.4                  | 16.3 | 0.03      | 17.3                 | 15.6 | 0.05      |
| Beta blocking agents                                  | 11.2                  | 10.5 | 0.02      | 11.5                 | 10.1 | 0.04      |
| Calcium channel blockers                              | 10.3                  | 6.0  | 0.16      | 9.8                  | 9.7  | 0.00      |
| Diuretics                                             | 22.9                  | 21.8 | 0.03      | 22.6                 | 19.2 | 0.08      |
| Drugs for acid related disorders                      | 77.9                  | 83.5 | -0.14     | 78.8                 | 78.0 | 0.02      |
| Drugs for obstructive airway diseases                 | 24.7                  | 25.5 | -0.02     | 24.2                 | 21.1 | 0.07      |
| Drugs used in diabetes                                | 10.5                  | 10.8 | -0.01     | 10.6                 | 9.2  | 0.05      |
| Immunosuppressants                                    | 32.6                  | 36.2 | -0.08     | 33.1                 | 30.3 | 0.06      |
| Lipid modifying agents                                | 25.3                  | 21.5 | 0.09      | 24.5                 | 23.3 | 0.03      |
| Opioids                                               | 22.6                  | 23.4 | -0.02     | 22.9                 | 23.5 | -0.01     |
| Psycholeptics                                         | 36.3                  | 40.7 | -0.09     | 37.1                 | 44.2 | -0.14     |
| Psychostimulants, agents used for adhd and nootropics | 1.3                   | 3.1  | -0.13     | 1.3                  | 2.0  | -0.05     |

## S6.1.14. VA

| Characteristic                                   | Before stratification |      |           | After stratification |      |           |
|--------------------------------------------------|-----------------------|------|-----------|----------------------|------|-----------|
|                                                  | HCQ                   | SSZ  |           | HCQ                  | SSZ  |           |
|                                                  | %                     | %    | Std. diff | %                    | %    | Std. diff |
| Age group                                        |                       |      |           |                      |      |           |
| 20-24                                            | 0.1                   | 0.1  | 0.00      | 0.1                  | 0.2  | -0.02     |
| 25-29                                            | 0.6                   | 0.6  | 0.00      | 0.6                  | 0.6  | -0.01     |
| 30-34                                            | 1.2                   | 1.0  | 0.02      | 1.1                  | 1.1  | 0.00      |
| 35-39                                            | 1.6                   | 1.7  | 0.00      | 1.5                  | 1.7  | -0.02     |
| 40-44                                            | 2.7                   | 3.0  | -0.02     | 2.7                  | 2.8  | -0.01     |
| 45-49                                            | 5.1                   | 5.1  | 0.00      | 5.1                  | 5.0  | 0.00      |
| 50-54                                            | 8.4                   | 9.7  | -0.05     | 8.8                  | 8.7  | 0.00      |
| 55-59                                            | 12.8                  | 14.5 | -0.05     | 13.4                 | 13.1 | 0.01      |
| 60-64                                            | 17.1                  | 17.8 | -0.02     | 17.3                 | 17.6 | -0.01     |
| 65-69                                            | 16.9                  | 17.0 | 0.00      | 17.1                 | 17.0 | 0.00      |
| 70-74                                            | 13.8                  | 13.7 | 0.00      | 13.9                 | 13.7 | 0.00      |
| 75-79                                            | 10.0                  | 9.1  | 0.03      | 9.8                  | 9.7  | 0.00      |
| 80-84                                            | 6.5                   | 4.7  | 0.08      | 5.9                  | 6.2  | -0.01     |
| 85-89                                            | 2.5                   | 1.6  | 0.06      | 2.2                  | 2.2  | 0.00      |
| 90-94                                            | 0.5                   | 0.3  | 0.03      | 0.5                  | 0.3  | 0.03      |
| Gender: female                                   | 14.5                  | 10.4 | 0.13      | 13.2                 | 13.1 | 0.00      |
| Race                                             |                       |      |           |                      |      |           |
| race = Asian                                     | 0.5                   | 0.4  | 0.00      | 0.5                  | 0.4  | 0.01      |
| race = Black or African American                 | 14.4                  | 12.9 | 0.04      | 13.9                 | 13.6 | 0.01      |
| race = White                                     | 73.6                  | 74.6 | -0.02     | 73.9                 | 74.1 | 0.00      |
| race = Unknown                                   | 9.9                   | 10.4 | -0.02     | 10.1                 | 10.2 | 0.00      |
| race = Native Hawaiian or Other Pacific Islander | 0.7                   | 0.8  | -0.01     | 0.7                  | 0.8  | -0.02     |
| race = American Indian or Alaska Native          | 0.9                   | 0.9  | 0.00      | 0.9                  | 0.8  | 0.01      |
| Ethnicity                                        |                       |      |           |                      |      |           |
| ethnicity = Hispanic or Latino                   | 4.8                   | 4.9  | 0.00      | 4.9                  | 4.7  | 0.00      |
| ethnicity = Not Hispanic or Latino               | 89.3                  | 88.6 | 0.02      | 89.0                 | 89.1 | 0.00      |
| Medical history: General                         |                       |      |           |                      |      |           |
| Acute respiratory disease                        | 11.4                  | 12.3 | -0.03     | 11.8                 | 11.3 | 0.02      |
| Attention deficit hyperactivity disorder         | 0.4                   | 0.4  | 0.00      | 0.4                  | 0.5  | -0.01     |
| Chronic liver disease                            | 3.4                   | 3.4  | 0.00      | 3.5                  | 3.6  | 0.00      |
| Crohn's disease                                  | 0.3                   | 0.9  | -0.07     | 0.4                  | 0.6  | -0.02     |
| Dementia                                         | 1.2                   | 1.0  | 0.02      | 1.1                  | 1.1  | 0.00      |
| Depressive disorder                              | 21.9                  | 21.6 | 0.01      | 21.8                 | 21.6 | 0.00      |
| Diabetes mellitus                                | 24.5                  | 23.8 | 0.02      | 24.1                 | 24.1 | 0.00      |
| Gastroesophageal reflux disease                  | 5.8                   | 5.4  | 0.01      | 5.6                  | 5.5  | 0.01      |
| Gastrointestinal hemorrhage                      | 2.1                   | 2.8  | -0.04     | 2.3                  | 2.3  | 0.00      |
| Human immunodeficiency virus infection           | 0.2                   | 0.2  | 0.00      | 0.2                  | 0.2  | 0.00      |
| Hypertensive disorder                            | 58.1                  | 57.6 | 0.01      | 58.0                 | 58.0 | 0.00      |
| Lesion of liver                                  | 1.4                   | 1.4  | 0.00      | 1.4                  | 1.4  | 0.01      |
| Obesity                                          | 14.3                  | 14.3 | 0.00      | 14.2                 | 14.3 | 0.00      |
| Psoriasis                                        | 2.2                   | 7.0  | -0.23     | 3.2                  | 4.1  | -0.05     |
| Renal impairment                                 | 7.2                   | 6.6  | 0.02      | 7.0                  | 7.1  | 0.00      |
| Rheumatoid arthritis                             | 90.4                  | 89.6 | 0.02      | 90.5                 | 90.2 | 0.01      |
| Schizophrenia                                    | 0.6                   | 0.7  | -0.01     | 0.6                  | 0.6  | 0.01      |
| Ulcerative colitis                               | 0.4                   | 1.0  | -0.06     | 0.5                  | 0.7  | -0.02     |
| Urinary tract infectious disease                 | 3.5                   | 3.1  | 0.02      | 3.4                  | 3.1  | 0.02      |
| Viral hepatitis C                                | 3.7                   | 3.7  | 0.00      | 3.7                  | 3.8  | 0.00      |
| Visual system disorder                           | 38.5                  | 41.9 | -0.07     | 39.5                 | 38.7 | 0.02      |
| Medical history: Cardiovascular disease          |                       |      |           |                      |      |           |
| Atrial fibrillation                              | 6.1                   | 5.4  | 0.03      | 5.9                  | 5.8  | 0.00      |
| Cerebrovascular disease                          | 4.3                   | 4.0  | 0.02      | 4.3                  | 4.3  | 0.00      |
| Coronary arteriosclerosis                        | 14.7                  | 15.1 | -0.01     | 14.8                 | 15.2 | -0.01     |
| Heart disease                                    | 30.5                  | 30.4 | 0.00      | 30.6                 | 31.1 | -0.01     |
| Heart failure                                    | 5.9                   | 6.1  | -0.01     | 5.9                  | 6.1  | -0.01     |
| Ischemic heart disease                           | 11.0                  | 11.2 | 0.00      | 11.1                 | 11.1 | 0.00      |
| Pulmonary embolism                               | 0.7                   | 0.8  | 0.00      | 0.7                  | 0.8  | -0.01     |

Risk of hydroxychloroquine with azithromycin

| Characteristic                                        | Before stratification |      |           | After stratification |      |           |
|-------------------------------------------------------|-----------------------|------|-----------|----------------------|------|-----------|
|                                                       | HCQ                   | SSZ  |           | HCQ                  | SSZ  |           |
|                                                       | %                     | %    | Std. diff | %                    | %    | Std. diff |
| Venous thrombosis                                     | 1.4                   | 1.3  | 0.01      | 1.4                  | 1.3  | 0.01      |
| Medical history: Neoplasms                            |                       |      |           |                      |      |           |
| Hematologic neoplasm                                  | 1.1                   | 1.0  | 0.02      | 1.1                  | 1.0  | 0.01      |
| Malignant lymphoma                                    | 0.8                   | 0.6  | 0.01      | 0.8                  | 0.6  | 0.02      |
| Malignant neoplasm of anorectum                       | 0.1                   | 0.1  | 0.00      | 0.2                  | 0.1  | 0.01      |
| Malignant tumor of breast                             | 0.4                   | 0.2  | 0.02      | 0.3                  | 0.3  | 0.01      |
| Malignant tumor of colon                              | 0.6                   | 0.6  | 0.00      | 0.6                  | 0.6  | 0.00      |
| Malignant tumor of lung                               | 0.3                   | 0.4  | -0.01     | 0.4                  | 0.4  | 0.00      |
| Malignant tumor of urinary bladder                    | 0.8                   | 0.8  | -0.01     | 0.7                  | 0.9  | -0.01     |
| Medication use                                        |                       |      |           |                      |      |           |
| Agents acting on the renin-angiotensin system         | 38.5                  | 39.2 | -0.01     | 38.8                 | 39.0 | 0.00      |
| Antibacterials for systemic use                       | 22.8                  | 25.3 | -0.06     | 23.8                 | 23.2 | 0.01      |
| Antidepressants                                       | 35.0                  | 36.1 | -0.02     | 35.3                 | 34.8 | 0.01      |
| Antiepileptics                                        | 21.3                  | 20.9 | 0.01      | 21.1                 | 21.0 | 0.00      |
| Antiinflammatory and antirheumatic products           | 47.8                  | 52.1 | -0.09     | 49.2                 | 47.8 | 0.03      |
| Antineoplastic agents                                 | 36.8                  | 41.7 | -0.10     | 38.8                 | 38.2 | 0.01      |
| Antipsoriatics                                        | 1.0                   | 2.0  | -0.09     | 1.1                  | 1.5  | -0.03     |
| Antithrombotic agents                                 | 28.6                  | 28.9 | -0.01     | 28.8                 | 28.6 | 0.01      |
| Beta blocking agents                                  | 32.0                  | 32.2 | 0.00      | 32.0                 | 32.1 | 0.00      |
| Calcium channel blockers                              | 21.8                  | 21.8 | 0.00      | 21.9                 | 22.3 | -0.01     |
| Diuretics                                             | 32.8                  | 33.5 | -0.02     | 33.1                 | 33.2 | 0.00      |
| Drugs for acid related disorders                      | 52.3                  | 55.9 | -0.07     | 53.5                 | 52.8 | 0.01      |
| Drugs for obstructive airway diseases                 | 27.8                  | 28.9 | -0.02     | 28.2                 | 28.0 | 0.00      |
| Drugs used in diabetes                                | 19.7                  | 19.4 | 0.01      | 19.4                 | 19.6 | 0.00      |
| Immunosuppressants                                    | 44.0                  | 51.9 | -0.16     | 47.0                 | 46.3 | 0.01      |
| Lipid modifying agents                                | 45.7                  | 45.1 | 0.01      | 45.5                 | 45.6 | 0.00      |
| Opioids                                               | 31.0                  | 34.1 | -0.06     | 32.0                 | 31.5 | 0.01      |
| Psycholeptics                                         | 23.7                  | 24.8 | -0.03     | 24.0                 | 24.0 | 0.00      |
| Psychostimulants, agents used for adhd and nootropics | 1.8                   | 1.6  | 0.02      | 1.8                  | 1.6  | 0.01      |

## S6.2. AZM vs AMX

## S6.2.1. AmbEMR

| Characteristic                           | Before stratification |      |           | After stratification |      |           |
|------------------------------------------|-----------------------|------|-----------|----------------------|------|-----------|
|                                          | AZM                   | AMX  | Std. diff | AZM                  | AMX  | Std. diff |
|                                          | %                     | %    |           | %                    | %    |           |
| Age group                                |                       |      |           |                      |      |           |
| 20-24                                    | 0.8                   | 0.7  | 0.01      | 0.8                  | 0.7  | 0.01      |
| 25-29                                    | 1.2                   | 1.3  | -0.01     | 1.3                  | 1.2  | 0.00      |
| 30-34                                    | 2.5                   | 2.3  | 0.02      | 2.6                  | 2.3  | 0.02      |
| 35-39                                    | 3.5                   | 3.9  | -0.02     | 3.7                  | 3.7  | 0.00      |
| 40-44                                    | 5.8                   | 5.1  | 0.03      | 5.8                  | 5.4  | 0.02      |
| 45-49                                    | 7.5                   | 7.3  | 0.01      | 7.7                  | 7.3  | 0.01      |
| 50-54                                    | 10.1                  | 10.4 | -0.01     | 10.1                 | 10.5 | -0.01     |
| 55-59                                    | 13.4                  | 13.7 | -0.01     | 13.5                 | 14.0 | -0.01     |
| 60-64                                    | 14.1                  | 14.4 | -0.01     | 13.9                 | 14.2 | -0.01     |
| 65-69                                    | 13.8                  | 14.1 | -0.01     | 13.7                 | 14.1 | -0.01     |
| 70-74                                    | 12.7                  | 12.1 | 0.02      | 12.2                 | 11.9 | 0.01      |
| 75-79                                    | 10.6                  | 10.1 | 0.02      | 10.6                 | 10.3 | 0.01      |
| 80-84                                    | 3.9                   | 4.5  | -0.03     | 4.1                  | 4.2  | -0.01     |
| Gender: female                           | 83.2                  | 82.5 | 0.02      | 83.2                 | 82.9 | 0.01      |
| Race                                     |                       |      |           |                      |      |           |
| race = Asian                             | 1.5                   | 1.1  | 0.03      | 1.4                  | 1.1  | 0.02      |
| race = White                             | 75.6                  | 75.3 | 0.01      | 75.7                 | 75.6 | 0.00      |
| race = African American                  | 8.2                   | 8.1  | 0.00      | 8.2                  | 8.1  | 0.00      |
| Ethnicity                                |                       |      |           |                      |      |           |
| ethnicity = Hispanic or Latino           | 1.5                   | 1.2  | 0.03      | 1.4                  | 1.2  | 0.02      |
| ethnicity = Not Hispanic or Latino       | 85.2                  | 84.5 | 0.02      | 85.3                 | 84.8 | 0.02      |
| Medical history: General                 |                       |      |           |                      |      |           |
| Acute respiratory disease                | 43.3                  | 34.9 | 0.17      | 39.9                 | 40.4 | -0.01     |
| Attention deficit hyperactivity disorder | 0.7                   | 0.9  | -0.03     | 0.7                  | 0.9  | -0.03     |
| Chronic liver disease                    | 1.5                   | 1.7  | -0.02     | 1.5                  | 1.7  | -0.02     |
| Chronic obstructive lung disease         | 10.6                  | 8.4  | 0.07      | 9.2                  | 10.4 | -0.04     |
| Crohn's disease                          | 0.4                   | 0.6  | -0.02     | 0.4                  | 0.5  | -0.01     |
| Dementia                                 | 0.7                   | 0.9  | -0.03     | 0.7                  | 0.9  | -0.02     |
| Depressive disorder                      | 19.4                  | 19.5 | 0.00      | 19.8                 | 19.7 | 0.00      |
| Diabetes mellitus                        | 14.0                  | 15.1 | -0.03     | 14.6                 | 14.9 | -0.01     |
| Gastroesophageal reflux disease          | 20.6                  | 21.1 | -0.01     | 20.9                 | 21.3 | -0.01     |
| Gastrointestinal hemorrhage              | 1.6                   | 1.8  | -0.01     | 1.7                  | 1.7  | 0.00      |
| Human immunodeficiency virus infection   | 0.1                   | 0.1  | 0.00      | 0.1                  | 0.1  | 0.00      |
| Hyperlipidemia                           | 33.2                  | 32.8 | 0.01      | 33.2                 | 32.8 | 0.01      |
| Hypertensive disorder                    | 41.4                  | 42.2 | -0.02     | 41.8                 | 41.6 | 0.00      |
| Lesion of liver                          | 0.8                   | 1.1  | -0.03     | 0.9                  | 1.1  | -0.02     |
| Obesity                                  | 11.7                  | 11.6 | 0.00      | 12.0                 | 11.8 | 0.00      |
| Osteoarthritis                           | 28.3                  | 29.7 | -0.03     | 28.8                 | 28.8 | 0.00      |
| Pneumonia                                | 6.5                   | 5.0  | 0.06      | 5.7                  | 6.5  | -0.03     |
| Psoriasis                                | 1.6                   | 1.8  | -0.02     | 1.6                  | 1.7  | -0.01     |
| Renal impairment                         | 6.5                   | 7.3  | -0.03     | 6.7                  | 7.2  | -0.02     |
| Rheumatoid arthritis                     | 80.0                  | 78.7 | 0.03      | 79.5                 | 79.2 | 0.01      |
| Schizophrenia                            | 0.1                   | 0.1  | 0.01      | 0.1                  | 0.1  | 0.01      |
| Ulcerative colitis                       | 0.5                   | 0.4  | 0.02      | 0.6                  | 0.4  | 0.04      |
| Urinary tract infectious disease         | 9.5                   | 11.9 | -0.08     | 10.4                 | 10.5 | -0.01     |
| Viral hepatitis C                        | 0.8                   | 1.1  | -0.03     | 0.8                  | 1.0  | -0.02     |
| Visual system disorder                   | 12.0                  | 12.4 | -0.01     | 12.2                 | 12.2 | 0.00      |
| Medical history: Cardiovascular disease  |                       |      |           |                      |      |           |
| Atrial fibrillation                      | 3.3                   | 4.0  | -0.04     | 3.4                  | 3.9  | -0.03     |
| Cerebrovascular disease                  | 3.5                   | 3.7  | -0.01     | 3.6                  | 3.4  | 0.01      |
| Heart disease                            | 17.5                  | 18.4 | -0.02     | 17.7                 | 18.2 | -0.01     |
| Heart failure                            | 3.5                   | 3.6  | -0.01     | 3.4                  | 3.7  | -0.02     |
| Ischemic heart disease                   | 1.9                   | 2.0  | 0.00      | 2.0                  | 1.9  | 0.01      |
| Peripheral vascular disease              | 2.0                   | 2.2  | -0.01     | 2.0                  | 2.0  | 0.00      |
| Pulmonary embolism                       | 1.0                   | 1.0  | 0.00      | 1.0                  | 1.0  | 0.00      |

Risk of hydroxychloroquine with azithromycin

| Characteristic                                        | Before stratification |      |           | After stratification |      |           |
|-------------------------------------------------------|-----------------------|------|-----------|----------------------|------|-----------|
|                                                       | AZM                   | AMX  |           | AZM                  | AMX  |           |
|                                                       | %                     | %    | Std. diff | %                    | %    | Std. diff |
| Venous thrombosis                                     | 1.6                   | 1.9  | -0.03     | 1.7                  | 1.8  | -0.01     |
| Medical history: Neoplasms                            |                       |      |           |                      |      |           |
| Hematologic neoplasm                                  | 0.6                   | 0.4  | 0.02      | 0.5                  | 0.5  | 0.00      |
| Malignant neoplastic disease                          | 7.4                   | 7.7  | -0.01     | 7.4                  | 7.7  | -0.01     |
| Malignant tumor of breast                             | 1.6                   | 1.6  | 0.00      | 1.6                  | 1.6  | 0.00      |
| Malignant tumor of lung                               | 0.5                   | 0.4  | 0.02      | 0.4                  | 0.5  | -0.01     |
| Malignant tumor of urinary bladder                    | 0.2                   | 0.3  | -0.01     | 0.2                  | 0.3  | -0.01     |
| Primary malignant neoplasm of prostate                | 0.3                   | 0.2  | 0.03      | 0.3                  | 0.2  | 0.02      |
| Medication use                                        |                       |      |           |                      |      |           |
| Agents acting on the renin-angiotensin system         | 35.5                  | 36.7 | -0.02     | 35.8                 | 36.0 | 0.00      |
| Antibacterials for systemic use                       | 41.3                  | 44.0 | -0.05     | 42.9                 | 43.4 | -0.01     |
| Antidepressants                                       | 43.1                  | 44.5 | -0.03     | 44.2                 | 44.2 | 0.00      |
| Antiepileptics                                        | 28.9                  | 30.3 | -0.03     | 30.1                 | 29.8 | 0.01      |
| Antiinflammatory and antirheumatic products           | 46.2                  | 47.0 | -0.02     | 46.7                 | 46.7 | 0.00      |
| Antineoplastic agents                                 | 39.6                  | 38.0 | 0.03      | 38.4                 | 39.1 | -0.02     |
| Antipsoriatics                                        | 0.9                   | 0.9  | 0.00      | 1.0                  | 0.8  | 0.02      |
| Antithrombotic agents                                 | 25.1                  | 27.4 | -0.05     | 25.9                 | 26.1 | 0.00      |
| Beta blocking agents                                  | 26.4                  | 28.5 | -0.05     | 27.4                 | 27.6 | 0.00      |
| Calcium channel blockers                              | 19.5                  | 20.2 | -0.02     | 19.9                 | 19.9 | 0.00      |
| Diuretics                                             | 35.3                  | 35.5 | 0.00      | 35.6                 | 35.4 | 0.00      |
| Drugs for acid related disorders                      | 49.4                  | 51.4 | -0.04     | 50.5                 | 50.9 | -0.01     |
| Drugs for obstructive airway diseases                 | 53.3                  | 45.1 | 0.16      | 49.3                 | 50.8 | -0.03     |
| Drugs used in diabetes                                | 14.6                  | 15.9 | -0.04     | 15.2                 | 15.4 | 0.00      |
| Immunosuppressants                                    | 55.9                  | 54.7 | 0.02      | 55.1                 | 55.5 | -0.01     |
| Lipid modifying agents                                | 34.4                  | 34.8 | -0.01     | 34.9                 | 34.5 | 0.01      |
| Opioids                                               | 34.8                  | 36.9 | -0.04     | 36.1                 | 35.4 | 0.02      |
| Psychostimulants, agents used for adhd and nootropics | 5.4                   | 5.4  | 0.00      | 5.5                  | 5.4  | 0.01      |

## S6.2.2. CCAE

| Characteristic                                | Before stratification |      |           | After stratification |      |           |
|-----------------------------------------------|-----------------------|------|-----------|----------------------|------|-----------|
|                                               | AZM                   | AMX  |           | AZM                  | AMX  |           |
|                                               | %                     | %    | Std. diff | %                    | %    | Std. diff |
| Age group                                     |                       |      |           |                      |      |           |
| 15-19                                         | 0.5                   | 0.4  | 0.00      | 0.5                  | 0.5  | 0.00      |
| 20-24                                         | 1.4                   | 1.3  | 0.01      | 1.4                  | 1.4  | 0.00      |
| 25-29                                         | 2.2                   | 2.1  | 0.01      | 2.2                  | 2.2  | 0.00      |
| 30-34                                         | 4.0                   | 3.7  | 0.02      | 4.0                  | 3.9  | 0.01      |
| 35-39                                         | 6.8                   | 6.5  | 0.02      | 6.8                  | 6.7  | 0.00      |
| 40-44                                         | 9.5                   | 8.9  | 0.02      | 9.3                  | 9.3  | 0.00      |
| 45-49                                         | 13.1                  | 13.2 | 0.00      | 13.2                 | 13.3 | 0.00      |
| 50-54                                         | 18.3                  | 17.9 | 0.01      | 18.1                 | 18.0 | 0.00      |
| 55-59                                         | 21.5                  | 22.0 | -0.01     | 21.5                 | 21.8 | -0.01     |
| 60-64                                         | 20.6                  | 21.8 | -0.03     | 21.1                 | 21.1 | 0.00      |
| 65-69                                         | 2.0                   | 2.1  | 0.00      | 2.0                  | 2.0  | 0.00      |
| Medical history: General                      |                       |      |           |                      |      |           |
| Acute respiratory disease                     | 62.5                  | 50.7 | 0.24      | 58.0                 | 57.5 | 0.01      |
| Attention deficit hyperactivity disorder      | 1.4                   | 1.5  | -0.01     | 1.4                  | 1.5  | 0.00      |
| Chronic liver disease                         | 2.7                   | 2.9  | -0.01     | 2.7                  | 2.8  | -0.01     |
| Chronic obstructive lung disease              | 5.6                   | 4.4  | 0.06      | 5.0                  | 5.2  | -0.01     |
| Dementia                                      | 0.3                   | 0.2  | 0.01      | 0.3                  | 0.2  | 0.01      |
| Depressive disorder                           | 14.7                  | 14.7 | 0.00      | 14.7                 | 14.8 | 0.00      |
| Diabetes mellitus                             | 12.7                  | 13.3 | -0.02     | 13.2                 | 13.1 | 0.00      |
| Gastroesophageal reflux disease               | 16.5                  | 16.8 | -0.01     | 16.7                 | 16.8 | 0.00      |
| Human immunodeficiency virus infection        | 0.1                   | 0.1  | 0.01      | 0.1                  | 0.1  | 0.01      |
| Hyperlipidemia                                | 30.4                  | 30.4 | 0.00      | 30.4                 | 30.3 | 0.00      |
| Lesion of liver                               | 0.8                   | 0.8  | -0.01     | 0.8                  | 0.8  | 0.00      |
| Obesity                                       | 9.4                   | 10.8 | -0.05     | 10.2                 | 10.1 | 0.00      |
| Osteoarthritis                                | 40.1                  | 42.2 | -0.04     | 41.5                 | 41.0 | 0.01      |
| Pneumonia                                     | 6.8                   | 4.3  | 0.11      | 5.7                  | 5.5  | 0.01      |
| Psoriasis                                     | 3.1                   | 3.0  | 0.00      | 3.0                  | 3.0  | 0.00      |
| Renal impairment                              | 3.9                   | 4.3  | -0.02     | 4.2                  | 4.1  | 0.00      |
| Rheumatoid arthritis                          | 83.6                  | 82.2 | 0.04      | 82.9                 | 83.0 | 0.00      |
| Ulcerative colitis                            | 0.7                   | 0.7  | 0.00      | 0.7                  | 0.7  | 0.00      |
| Urinary tract infectious disease              | 13.6                  | 14.3 | -0.02     | 14.0                 | 13.9 | 0.00      |
| Viral hepatitis C                             | 0.7                   | 0.9  | -0.02     | 0.8                  | 0.9  | -0.01     |
| Visual system disorder                        | 36.8                  | 37.0 | 0.00      | 36.9                 | 37.1 | 0.00      |
| Medical history: Cardiovascular disease       |                       |      |           |                      |      |           |
| Atrial fibrillation                           | 1.5                   | 1.9  | -0.03     | 1.7                  | 1.8  | 0.00      |
| Cerebrovascular disease                       | 3.2                   | 3.1  | 0.00      | 3.1                  | 3.2  | -0.01     |
| Coronary arteriosclerosis                     | 4.8                   | 5.0  | -0.01     | 5.0                  | 4.9  | 0.00      |
| Heart disease                                 | 17.3                  | 18.2 | -0.02     | 17.8                 | 17.9 | 0.00      |
| Heart failure                                 | 2.5                   | 2.3  | 0.01      | 2.5                  | 2.4  | 0.01      |
| Ischemic heart disease                        | 3.2                   | 3.2  | 0.00      | 3.3                  | 3.1  | 0.01      |
| Peripheral vascular disease                   | 1.6                   | 1.7  | -0.01     | 1.6                  | 1.7  | -0.01     |
| Pulmonary embolism                            | 0.9                   | 1.0  | -0.01     | 0.9                  | 1.0  | -0.01     |
| Venous thrombosis                             | 1.6                   | 1.8  | -0.01     | 1.7                  | 1.8  | 0.00      |
| Medical history: Neoplasms                    |                       |      |           |                      |      |           |
| Hematologic neoplasm                          | 1.2                   | 1.1  | 0.01      | 1.2                  | 1.1  | 0.00      |
| Malignant lymphoma                            | 0.7                   | 0.6  | 0.00      | 0.6                  | 0.6  | 0.00      |
| Malignant neoplastic disease                  | 7.6                   | 7.5  | 0.00      | 7.6                  | 7.5  | 0.00      |
| Malignant tumor of colon                      | 0.2                   | 0.2  | -0.01     | 0.2                  | 0.2  | 0.00      |
| Malignant tumor of lung                       | 0.2                   | 0.2  | 0.01      | 0.2                  | 0.2  | 0.01      |
| Malignant tumor of urinary bladder            | 0.2                   | 0.1  | 0.00      | 0.1                  | 0.1  | 0.00      |
| Primary malignant neoplasm of prostate        | 0.2                   | 0.3  | -0.02     | 0.2                  | 0.3  | -0.01     |
| Medication use                                |                       |      |           |                      |      |           |
| Agents acting on the renin-angiotensin system | 26.6                  | 27.2 | -0.01     | 27.1                 | 26.9 | 0.00      |
| Antibacterials for systemic use               | 50.6                  | 50.3 | 0.00      | 51.1                 | 51.0 | 0.00      |
| Antidepressants                               | 43.3                  | 42.0 | 0.02      | 43.0                 | 42.8 | 0.00      |
| Antiinflammatory and antirheumatic products   | 51.0                  | 53.1 | -0.04     | 51.9                 | 52.0 | 0.00      |



## Risk of hydroxychloroquine with azithromycin

| Characteristic                                        | Before stratification |      |           | After stratification |      |           |
|-------------------------------------------------------|-----------------------|------|-----------|----------------------|------|-----------|
|                                                       | AZM                   | AMX  |           | AZM                  | AMX  |           |
|                                                       | %                     | %    | Std. diff | %                    | %    | Std. diff |
| Antipsoriatics                                        | 0.9                   | 0.9  | -0.01     | 0.9                  | 0.9  | 0.00      |
| Antithrombotic agents                                 | 8.9                   | 10.8 | -0.06     | 9.8                  | 9.9  | 0.00      |
| Beta blocking agents                                  | 18.1                  | 18.6 | -0.01     | 18.7                 | 18.4 | 0.01      |
| Calcium channel blockers                              | 13.8                  | 14.0 | -0.01     | 14.1                 | 13.9 | 0.00      |
| Diuretics                                             | 28.0                  | 28.0 | 0.00      | 28.3                 | 28.3 | 0.00      |
| Drugs for acid related disorders                      | 40.7                  | 40.1 | 0.01      | 40.5                 | 40.8 | -0.01     |
| Drugs for obstructive airway diseases                 | 43.6                  | 37.0 | 0.13      | 41.1                 | 40.7 | 0.01      |
| Drugs used in diabetes                                | 9.8                   | 10.4 | -0.02     | 10.3                 | 10.2 | 0.00      |
| Immunosuppressants                                    | 52.5                  | 49.8 | 0.05      | 51.1                 | 51.2 | 0.00      |
| Lipid modifying agents                                | 22.5                  | 22.9 | -0.01     | 22.7                 | 22.6 | 0.00      |
| Opioids                                               | 40.1                  | 42.0 | -0.04     | 41.4                 | 41.2 | 0.00      |
| Psycholeptics                                         | 38.6                  | 37.4 | 0.02      | 38.2                 | 38.1 | 0.00      |
| Psychostimulants, agents used for adhd and nootropics | 7.3                   | 7.1  | 0.01      | 7.3                  | 7.4  | 0.00      |

## S6.2.3. Clinformatics

| Characteristic                          | Before stratification |      |           | After stratification |      |           |
|-----------------------------------------|-----------------------|------|-----------|----------------------|------|-----------|
|                                         | AZM                   | AMX  |           | AZM                  | AMX  |           |
|                                         | %                     | %    | Std. diff | %                    | %    | Std. diff |
| Age group                               |                       |      |           |                      |      |           |
| 15-19                                   | 0.3                   | 0.2  | 0.00      | 0.2                  | 0.3  | 0.00      |
| 20-24                                   | 0.8                   | 0.8  | 0.00      | 0.9                  | 1.0  | -0.01     |
| 25-29                                   | 1.5                   | 1.4  | 0.01      | 1.5                  | 1.4  | 0.01      |
| 30-34                                   | 3.1                   | 2.7  | 0.02      | 3.0                  | 2.8  | 0.01      |
| 35-39                                   | 4.4                   | 4.2  | 0.01      | 4.3                  | 4.4  | -0.01     |
| 40-44                                   | 6.8                   | 6.0  | 0.03      | 6.6                  | 6.4  | 0.01      |
| 45-49                                   | 8.6                   | 8.6  | 0.00      | 8.6                  | 8.9  | -0.01     |
| 55-59                                   | 14.0                  | 13.5 | 0.01      | 13.9                 | 13.6 | 0.01      |
| 60-64                                   | 13.3                  | 13.2 | 0.00      | 13.3                 | 13.0 | 0.01      |
| 65-69                                   | 12.1                  | 12.8 | -0.02     | 12.4                 | 12.6 | -0.01     |
| 70-74                                   | 10.2                  | 10.8 | -0.02     | 10.2                 | 10.3 | 0.00      |
| 75-79                                   | 7.2                   | 7.8  | -0.02     | 7.2                  | 7.4  | -0.01     |
| 80-84                                   | 4.4                   | 4.8  | -0.02     | 4.4                  | 4.5  | -0.01     |
| 85-89                                   | 1.7                   | 1.9  | -0.02     | 1.8                  | 1.8  | 0.00      |
| Gender: female                          | 84.9                  | 82.9 | 0.06      | 84.0                 | 83.9 | 0.00      |
| Medical history: General                |                       |      |           |                      |      |           |
| Acute respiratory disease               | 64.9                  | 48.7 | 0.33      | 57.7                 | 57.7 | 0.00      |
| Chronic obstructive lung disease        | 14.8                  | 11.0 | 0.11      | 13.0                 | 13.1 | 0.00      |
| Crohn's disease                         | 0.7                   | 0.7  | 0.01      | 0.8                  | 0.6  | 0.02      |
| Dementia                                | 1.5                   | 1.9  | -0.03     | 1.7                  | 1.9  | -0.02     |
| Depressive disorder                     | 20.7                  | 21.4 | -0.02     | 21.3                 | 21.2 | 0.00      |
| Diabetes mellitus                       | 20.4                  | 20.7 | -0.01     | 20.4                 | 20.7 | -0.01     |
| Gastroesophageal reflux disease         | 25.6                  | 26.1 | -0.01     | 26.1                 | 25.8 | 0.01      |
| Gastrointestinal hemorrhage             | 4.2                   | 4.5  | -0.02     | 4.4                  | 4.5  | 0.00      |
| Human immunodeficiency virus infection  | 0.2                   | 0.2  | 0.00      | 0.2                  | 0.2  | 0.00      |
| Hyperlipidemia                          | 46.3                  | 46.7 | -0.01     | 46.4                 | 46.3 | 0.00      |
| Hypertensive disorder                   | 53.9                  | 55.5 | -0.03     | 54.6                 | 54.8 | 0.00      |
| Lesion of liver                         | 1.1                   | 1.3  | -0.02     | 1.1                  | 1.3  | -0.02     |
| Osteoarthritis                          | 52.5                  | 56.2 | -0.07     | 54.5                 | 54.5 | 0.00      |
| Pneumonia                               | 10.7                  | 7.2  | 0.12      | 9.0                  | 9.0  | 0.00      |
| Psoriasis                               | 3.3                   | 3.0  | 0.01      | 3.2                  | 3.1  | 0.01      |
| Renal impairment                        | 11.1                  | 12.4 | -0.04     | 11.5                 | 11.7 | -0.01     |
| Rheumatoid arthritis                    | 84.5                  | 83.3 | 0.03      | 84.0                 | 84.0 | 0.00      |
| Schizophrenia                           | 0.2                   | 0.2  | -0.01     | 0.2                  | 0.2  | 0.00      |
| Ulcerative colitis                      | 0.7                   | 0.8  | -0.01     | 0.8                  | 0.8  | 0.00      |
| Urinary tract infectious disease        | 17.6                  | 19.3 | -0.04     | 18.6                 | 18.5 | 0.00      |
| Viral hepatitis C                       | 1.1                   | 1.4  | -0.03     | 1.2                  | 1.3  | -0.01     |
| Medical history: Cardiovascular disease |                       |      |           |                      |      |           |
| Atrial fibrillation                     | 4.7                   | 6.0  | -0.06     | 5.2                  | 5.5  | -0.01     |
| Cerebrovascular disease                 | 6.5                   | 7.0  | -0.02     | 6.6                  | 6.8  | -0.01     |
| Coronary arteriosclerosis               | 11.4                  | 12.1 | -0.02     | 11.6                 | 11.8 | 0.00      |
| Heart disease                           | 29.8                  | 31.2 | -0.03     | 30.4                 | 30.6 | 0.00      |
| Heart failure                           | 7.5                   | 7.4  | 0.00      | 7.6                  | 7.4  | 0.01      |
| Ischemic heart disease                  | 7.0                   | 7.3  | -0.01     | 7.1                  | 7.3  | 0.00      |
| Peripheral vascular disease             | 4.9                   | 5.2  | -0.02     | 5.1                  | 5.0  | 0.01      |
| Pulmonary embolism                      | 1.3                   | 1.4  | -0.01     | 1.3                  | 1.4  | 0.00      |
| Venous thrombosis                       | 2.5                   | 2.9  | -0.02     | 2.6                  | 2.8  | -0.01     |
| Medical history: Neoplasms              |                       |      |           |                      |      |           |
| Hematologic neoplasm                    | 1.6                   | 1.5  | 0.01      | 1.7                  | 1.5  | 0.01      |
| Malignant lymphoma                      | 0.9                   | 0.9  | 0.00      | 0.9                  | 0.9  | 0.01      |
| Malignant neoplasm of anorectum         | 0.1                   | 0.2  | -0.02     | 0.1                  | 0.2  | -0.01     |
| Malignant neoplastic disease            | 11.3                  | 11.9 | -0.02     | 11.4                 | 11.6 | -0.01     |
| Malignant tumor of breast               | 2.7                   | 2.7  | 0.00      | 2.6                  | 2.7  | 0.00      |
| Malignant tumor of colon                | 0.4                   | 0.4  | -0.01     | 0.3                  | 0.4  | -0.01     |
| Malignant tumor of lung                 | 0.6                   | 0.4  | 0.02      | 0.5                  | 0.5  | -0.01     |
| Malignant tumor of urinary bladder      | 0.3                   | 0.4  | -0.03     | 0.3                  | 0.4  | -0.01     |

Risk of hydroxychloroquine with azithromycin

| Characteristic                                        | Before stratification |      |           | After stratification |      |           |
|-------------------------------------------------------|-----------------------|------|-----------|----------------------|------|-----------|
|                                                       | AZM                   | AMX  |           | AZM                  | AMX  |           |
|                                                       | %                     | %    | Std. diff | %                    | %    | Std. diff |
| Primary malignant neoplasm of prostate                | 0.8                   | 0.9  | -0.02     | 0.8                  | 0.8  | 0.00      |
| Medication use                                        |                       |      |           |                      |      |           |
| Antidepressants                                       | 42.5                  | 42.6 | 0.00      | 43.0                 | 42.8 | 0.00      |
| Antiepileptics                                        | 27.7                  | 28.2 | -0.01     | 28.4                 | 27.9 | 0.01      |
| Antiinflammatory and antirheumatic products           | 44.2                  | 45.7 | -0.03     | 45.5                 | 45.2 | 0.01      |
| Antineoplastic agents                                 | 35.2                  | 33.1 | 0.04      | 33.4                 | 34.2 | -0.02     |
| Antipsoriatics                                        | 1.1                   | 1.0  | 0.01      | 1.1                  | 1.1  | 0.01      |
| Antithrombotic agents                                 | 13.1                  | 15.4 | -0.07     | 14.0                 | 14.2 | 0.00      |
| Beta blocking agents                                  | 25.8                  | 27.1 | -0.03     | 26.5                 | 26.4 | 0.00      |
| Drugs for acid related disorders                      | 41.8                  | 41.9 | 0.00      | 41.9                 | 41.8 | 0.00      |
| Drugs for obstructive airway diseases                 | 45.4                  | 36.4 | 0.18      | 41.2                 | 41.1 | 0.00      |
| Immunosuppressants                                    | 49.8                  | 47.4 | 0.05      | 48.3                 | 48.4 | 0.00      |
| Lipid modifying agents                                | 32.4                  | 33.2 | -0.02     | 32.6                 | 32.6 | 0.00      |
| Opioids                                               | 41.0                  | 43.3 | -0.05     | 42.7                 | 42.0 | 0.01      |
| Psycholeptics                                         | 35.8                  | 36.3 | -0.01     | 36.5                 | 36.6 | 0.00      |
| Psychostimulants, agents used for adhd and nootropics | 5.2                   | 4.8  | 0.02      | 5.3                  | 5.0  | 0.02      |

## S6.2.4. CPRD

| Characteristic                                | Before stratification |      |           | After stratification |      |           |
|-----------------------------------------------|-----------------------|------|-----------|----------------------|------|-----------|
|                                               | AZM                   | AMX  |           | AZM                  | AMX  |           |
|                                               | %                     | %    | Std. diff | %                    | %    | Std. diff |
| Age group                                     |                       |      |           |                      |      |           |
| 20-24                                         | <4.3                  | 0.3  | 0.07      | 2.8                  | 0.3  | 0.20      |
| 25-29                                         | <4.3                  | 1.0  | -0.01     | 2.8                  | 1.0  | 0.13      |
| 35-39                                         | <4.3                  | 3.4  | 0.00      | 9.4                  | 3.4  | 0.24      |
| 40-44                                         | <4.3                  | 4.8  | -0.07     | 8.9                  | 4.8  | 0.16      |
| 45-49                                         | 7.0                   | 7.2  | -0.01     | 4.4                  | 7.2  | -0.12     |
| 50-54                                         | 5.2                   | 10.1 | -0.18     | 8.1                  | 10.0 | -0.07     |
| 55-59                                         | 13.9                  | 12.9 | 0.03      | 9.4                  | 12.9 | -0.11     |
| 60-64                                         | 20.9                  | 14.2 | 0.18      | 13.3                 | 14.2 | -0.03     |
| 65-69                                         | 13.0                  | 14.3 | -0.04     | 9.2                  | 14.3 | -0.16     |
| 70-74                                         | 14.8                  | 12.2 | 0.08      | 13.3                 | 12.2 | 0.03      |
| 75-79                                         | 8.7                   | 9.6  | -0.03     | 5.3                  | 9.6  | -0.17     |
| 80-84                                         | 6.1                   | 5.6  | 0.02      | 10.3                 | 5.6  | 0.17      |
| 85-89                                         | <4.3                  | 1.9  | -0.09     | <1.9                 | 1.9  | -0.16     |
| 90-94                                         | <4.3                  | 0.6  | 0.03      | 2.5                  | 0.6  | 0.15      |
| Gender: female                                | 78.3                  | 73.4 | 0.11      | 73.9                 | 73.4 | 0.01      |
| Medical history: General                      |                       |      |           |                      |      |           |
| Acute respiratory disease                     | 30.4                  | 20.9 | 0.22      | 29.2                 | 21.1 | 0.19      |
| Chronic obstructive lung disease              | 13.0                  | 3.7  | 0.34      | 6.7                  | 3.8  | 0.13      |
| Depressive disorder                           | <4.3                  | 2.5  | 0.06      | <1.9                 | 2.5  | -0.10     |
| Diabetes mellitus                             | 4.3                   | 2.3  | 0.11      | 3.6                  | 2.3  | 0.08      |
| Gastroesophageal reflux disease               | <4.3                  | 0.7  | 0.02      | <1.9                 | 0.7  | -0.06     |
| Gastrointestinal hemorrhage                   | <4.3                  | 1.6  | -0.07     | <1.9                 | 1.6  | -0.14     |
| Hyperlipidemia                                | <4.3                  | 0.9  | -0.01     | <1.9                 | 0.9  | -0.08     |
| Hypertensive disorder                         | <4.3                  | 2.7  | -0.01     | <1.9                 | 2.7  | -0.14     |
| Lesion of liver                               | <4.3                  | 0.1  | 0.11      | <1.9                 | <0.1 | 0.04      |
| Obesity                                       | <4.3                  | 0.3  | 0.07      | <1.9                 | 0.3  | -0.01     |
| Osteoarthritis                                | 6.1                   | 4.4  | 0.07      | 8.1                  | 4.5  | 0.15      |
| Pneumonia                                     | <4.3                  | 1.4  | 0.09      | <1.9                 | 1.4  | -0.05     |
| Renal impairment                              | <4.3                  | 3.5  | -0.18     | 2.5                  | 3.5  | -0.06     |
| Rheumatoid arthritis                          | 45.2                  | 36.8 | 0.17      | 36.4                 | 36.9 | -0.01     |
| Urinary tract infectious disease              | <4.3                  | 5.2  | -0.25     | <1.9                 | 5.2  | -0.30     |
| Visual system disorder                        | 7.0                   | 8.3  | -0.05     | 9.4                  | 8.3  | 0.04      |
| Medical history: Cardiovascular disease       |                       |      |           |                      |      |           |
| Atrial fibrillation                           | <4.3                  | 1.1  | 0.12      | <1.9                 | 1.1  | -0.03     |
| Heart disease                                 | <4.3                  | 3.8  | -0.02     | <1.9                 | 3.8  | -0.18     |
| Medical history: Neoplasms                    |                       |      |           |                      |      |           |
| Hematologic neoplasm                          | <4.3                  | <0.1 | 0.12      | <1.9                 | <0.1 | 0.05      |
| Malignant lymphoma                            | <4.3                  | <0.1 | 0.12      | <1.9                 | <0.1 | 0.05      |
| Malignant neoplastic disease                  | <4.3                  | 1.8  | 0.11      | 3.3                  | 1.8  | 0.10      |
| Malignant tumor of breast                     | <4.3                  | 0.1  | 0.10      | 2.5                  | 0.1  | 0.20      |
| Medication use                                |                       |      |           |                      |      |           |
| Agents acting on the renin-angiotensin system | 28.7                  | 26.5 | 0.05      | 22.2                 | 26.5 | -0.10     |
| Antibacterials for systemic use               | 73.9                  | 44.5 | 0.63      | 49.2                 | 45.0 | 0.08      |
| Antidepressants                               | 38.3                  | 31.8 | 0.14      | 29.7                 | 31.9 | -0.05     |
| Antiepileptics                                | 15.7                  | 8.7  | 0.21      | 5.0                  | 8.8  | -0.15     |
| Antiinflammatory and antirheumatic products   | 53.0                  | 52.1 | 0.02      | 50.3                 | 52.2 | -0.04     |
| Antineoplastic agents                         | 37.4                  | 52.7 | -0.31     | 45.3                 | 52.5 | -0.14     |
| Antipsoriatics                                | <4.3                  | 0.9  | -0.01     | 2.5                  | 0.9  | 0.12      |
| Antithrombotic agents                         | 27.0                  | 23.8 | 0.07      | 15.8                 | 23.9 | -0.20     |
| Beta blocking agents                          | 10.4                  | 16.7 | -0.18     | 7.8                  | 16.7 | -0.27     |
| Calcium channel blockers                      | 18.3                  | 18.8 | -0.02     | 11.9                 | 18.8 | -0.19     |
| Diuretics                                     | 18.3                  | 23.3 | -0.12     | 15.0                 | 23.3 | -0.21     |
| Drugs for acid related disorders              | 74.8                  | 63.9 | 0.24      | 64.7                 | 64.1 | 0.01      |
| Drugs for obstructive airway diseases         | 69.6                  | 32.3 | 0.80      | 29.2                 | 33.0 | -0.08     |
| Drugs used in diabetes                        | 10.4                  | 8.8  | 0.06      | 10.3                 | 8.8  | 0.05      |
| Immunosuppressants                            | 47.0                  | 58.1 | -0.22     | 50.6                 | 57.9 | -0.15     |

Risk of hydroxychloroquine with azithromycin

| Characteristic         | Before stratification |      |           | After stratification |      |           |
|------------------------|-----------------------|------|-----------|----------------------|------|-----------|
|                        | AZM                   | AMX  |           | AZM                  | AMX  |           |
|                        | %                     | %    | Std. diff | %                    | %    | Std. diff |
| Lipid modifying agents | 32.2                  | 28.3 | 0.08      | 16.9                 | 28.4 | -0.27     |
| Opioids                | 46.1                  | 39.2 | 0.14      | 45.3                 | 39.3 | 0.12      |
| Psycholeptics          | 20.9                  | 19.9 | 0.02      | 15.6                 | 19.9 | -0.11     |

## S6.2.5. DAGermany

| Characteristic                                | Before stratification |      |           | After stratification |      |           |
|-----------------------------------------------|-----------------------|------|-----------|----------------------|------|-----------|
|                                               | AZM                   | AMX  |           | AZM                  | AMX  |           |
|                                               | %                     | %    | Std. diff | %                    | %    | Std. diff |
| Age group                                     |                       |      |           |                      |      |           |
| 20-24                                         | <5.6                  | <2.5 | 0.02      | <5.6                 | <2.5 | 0.02      |
| 30-34                                         | <5.6                  | 4.0  | -0.10     | <5.6                 | 4.0  | -0.10     |
| 35-39                                         | 6.7                   | 4.5  | 0.10      | 6.7                  | 4.5  | 0.10      |
| 40-44                                         | 12.4                  | 4.0  | 0.31      | 12.4                 | 4.0  | 0.31      |
| 45-49                                         | 7.9                   | 9.4  | -0.06     | 7.9                  | 9.4  | -0.06     |
| 50-54                                         | 13.5                  | 9.4  | 0.13      | 13.5                 | 9.4  | 0.13      |
| 55-59                                         | 16.9                  | 13.4 | 0.10      | 16.9                 | 13.4 | 0.10      |
| 60-64                                         | 12.4                  | 10.9 | 0.05      | 12.4                 | 10.9 | 0.05      |
| 65-69                                         | 10.1                  | 12.4 | -0.07     | 10.1                 | 12.4 | -0.07     |
| 70-74                                         | 7.9                   | 9.4  | -0.06     | 7.9                  | 9.4  | -0.06     |
| 75-79                                         | 5.6                   | 6.9  | -0.05     | 5.6                  | 6.9  | -0.05     |
| 80-84                                         | <5.6                  | 6.9  | -0.22     | <5.6                 | 6.9  | -0.22     |
| Gender: female                                | 89.9                  | 79.2 | 0.30      | 89.9                 | 79.2 | 0.30      |
| Medical history: General                      |                       |      |           |                      |      |           |
| Acute respiratory disease                     | 61.8                  | 55.4 | 0.13      | 61.8                 | 55.4 | 0.13      |
| Chronic liver disease                         | <5.6                  | <2.5 | -0.07     | <5.6                 | <2.5 | -0.07     |
| Chronic obstructive lung disease              | 6.7                   | 11.4 | -0.16     | 6.7                  | 11.4 | -0.16     |
| Depressive disorder                           | 14.6                  | 10.4 | 0.13      | 14.6                 | 10.4 | 0.13      |
| Diabetes mellitus                             | 5.6                   | 13.4 | -0.27     | 5.6                  | 13.4 | -0.27     |
| Hyperlipidemia                                | 9.0                   | 13.4 | -0.14     | 9.0                  | 13.4 | -0.14     |
| Hypertensive disorder                         | 28.1                  | 40.1 | -0.26     | 28.1                 | 40.1 | -0.25     |
| Obesity                                       | <5.6                  | 5.0  | -0.02     | <5.6                 | 5.0  | -0.02     |
| Osteoarthritis                                | 11.2                  | 13.4 | -0.06     | 11.2                 | 13.4 | -0.06     |
| Pneumonia                                     | <5.6                  | 6.9  | -0.22     | <5.6                 | 6.9  | -0.22     |
| Psoriasis                                     | <5.6                  | <2.5 | 0.15      | <5.6                 | <2.5 | 0.15      |
| Renal impairment                              | <5.6                  | 4.5  | -0.06     | <5.6                 | 4.5  | -0.06     |
| Rheumatoid arthritis                          | 56.2                  | 57.9 | -0.04     | 56.2                 | 57.9 | -0.04     |
| Urinary tract infectious disease              | 5.6                   | 9.9  | -0.16     | 5.6                  | 9.9  | -0.16     |
| Visual system disorder                        | 11.2                  | 16.8 | -0.16     | 11.2                 | 16.8 | -0.16     |
| Medical history: Cardiovascular disease       |                       |      |           |                      |      |           |
| Cerebrovascular disease                       | <5.6                  | <2.5 | 0.14      | <5.6                 | <2.5 | 0.14      |
| Coronary arteriosclerosis                     | <5.6                  | <2.5 | 0.06      | <5.6                 | <2.5 | 0.06      |
| Heart disease                                 | 11.2                  | 21.8 | -0.29     | 11.2                 | 21.8 | -0.29     |
| Heart failure                                 | <5.6                  | 6.9  | -0.30     | <5.6                 | 6.9  | -0.30     |
| Ischemic heart disease                        | <5.6                  | 7.9  | -0.14     | <5.6                 | 7.9  | -0.14     |
| Peripheral vascular disease                   | <5.6                  | 2.5  | -0.10     | <5.6                 | 2.5  | -0.10     |
| Venous thrombosis                             | <5.6                  | 5.9  | -0.12     | <5.6                 | 5.9  | -0.12     |
| Medical history: Neoplasms                    |                       |      |           |                      |      |           |
| Malignant neoplastic disease                  | <5.6                  | 6.4  | -0.08     | <5.6                 | 6.4  | -0.08     |
| Medication use                                |                       |      |           |                      |      |           |
| Agents acting on the renin-angiotensin system | 29.2                  | 39.6 | -0.22     | 29.2                 | 39.6 | -0.22     |
| Antibacterials for systemic use               | 29.2                  | 37.6 | -0.18     | 29.2                 | 37.6 | -0.18     |
| Antidepressants                               | 16.9                  | 18.8 | -0.05     | 16.9                 | 18.8 | -0.05     |
| Antiepileptics                                | <5.6                  | 7.9  | -0.14     | <5.6                 | 7.9  | -0.14     |
| Antiinflammatory and antirheumatic products   | 43.8                  | 46.5 | -0.06     | 43.8                 | 46.5 | -0.05     |
| Antineoplastic agents                         | 29.2                  | 27.2 | 0.04      | 29.2                 | 27.2 | 0.04      |
| Antithrombotic agents                         | 13.5                  | 26.2 | -0.32     | 13.5                 | 26.2 | -0.32     |
| Beta blocking agents                          | 25.8                  | 35.6 | -0.21     | 25.8                 | 35.6 | -0.21     |
| Calcium channel blockers                      | 16.9                  | 18.3 | -0.04     | 16.9                 | 18.3 | -0.04     |
| Diuretics                                     | 19.1                  | 39.1 | -0.45     | 19.1                 | 39.1 | -0.45     |
| Drugs for acid related disorders              | 65.2                  | 69.8 | -0.10     | 65.2                 | 69.8 | -0.10     |
| Drugs for obstructive airway diseases         | 19.1                  | 21.8 | -0.07     | 19.1                 | 21.8 | -0.07     |
| Drugs used in diabetes                        | 6.7                   | 12.9 | -0.21     | 6.7                  | 12.9 | -0.21     |
| Immunosuppressants                            | 37.1                  | 32.7 | 0.09      | 37.1                 | 32.7 | 0.09      |
| Lipid modifying agents                        | 5.6                   | 17.8 | -0.39     | 5.6                  | 17.8 | -0.38     |
| Opioids                                       | 20.2                  | 27.2 | -0.16     | 20.2                 | 27.2 | -0.16     |

Risk of hydroxychloroquine with azithromycin

| Characteristic | Before stratification |      |           | After stratification |      |           |
|----------------|-----------------------|------|-----------|----------------------|------|-----------|
|                | AZM                   | AMX  |           | AZM                  | AMX  |           |
|                | %                     | %    | Std. diff | %                    | %    | Std. diff |
| Psycholeptics  | 16.9                  | 10.4 | 0.19      | 16.9                 | 10.4 | 0.19      |

## S6.2.6. IMRD

| Characteristic                              | Before stratification |      |           | After stratification |      |           |
|---------------------------------------------|-----------------------|------|-----------|----------------------|------|-----------|
|                                             | AZM                   | AMX  |           | AZM                  | AMX  |           |
|                                             | %                     | %    | Std. diff | %                    | %    | Std. diff |
| Age group                                   |                       |      |           |                      |      |           |
| 25-29                                       | <4.5                  | 0.9  | 0.13      | 3.6                  | 0.9  | 0.18      |
| 30-34                                       | <4.5                  | 1.7  | -0.07     | 6.7                  | 1.7  | 0.25      |
| 35-39                                       | 4.5                   | 3.1  | 0.07      | 10.0                 | 3.1  | 0.28      |
| 40-44                                       | <4.5                  | 4.3  | -0.09     | 3.3                  | 4.3  | -0.05     |
| 45-49                                       | 5.4                   | 7.3  | -0.08     | 4.0                  | 7.2  | -0.14     |
| 50-54                                       | <4.5                  | 10.1 | -0.26     | 3.8                  | 10.1 | -0.25     |
| 55-59                                       | 9.8                   | 12.4 | -0.08     | 2.6                  | 12.4 | -0.38     |
| 60-64                                       | 17.9                  | 14.6 | 0.09      | 16.6                 | 14.5 | 0.06      |
| 65-69                                       | 13.4                  | 14.6 | -0.04     | 19.7                 | 14.7 | 0.13      |
| 70-74                                       | 19.6                  | 12.7 | 0.19      | 14.2                 | 12.7 | 0.04      |
| 75-79                                       | 9.8                   | 9.5  | 0.01      | 6.9                  | 9.5  | -0.10     |
| 80-84                                       | 8.0                   | 5.7  | 0.09      | 8.3                  | 5.7  | 0.10      |
| 85-89                                       | <4.5                  | 2.0  | -0.10     | <1.6                 | 2.1  | -0.17     |
| 90-94                                       | <4.5                  | 0.5  | 0.04      | <1.6                 | 0.5  | -0.05     |
| Gender: female                              | 78.6                  | 73.8 | 0.11      | 74.1                 | 73.8 | 0.01      |
| Race                                        |                       |      |           |                      |      |           |
| race = White                                | 30.4                  | 30.8 | -0.01     | 48.2                 | 30.7 | 0.36      |
| race = Asian Indian                         | <4.5                  | 0.6  | 0.03      | 2.9                  | 0.6  | 0.17      |
| race = Pakistani                            | <4.5                  | 0.4  | 0.07      | 1.7                  | 0.4  | 0.13      |
| Medical history: General                    |                       |      |           |                      |      |           |
| Acute respiratory disease                   | 29.5                  | 20.8 | 0.20      | 20.6                 | 20.9 | -0.01     |
| Chronic obstructive lung disease            | 17.0                  | 3.7  | 0.45      | 5.9                  | 3.9  | 0.09      |
| Depressive disorder                         | 4.5                   | 2.5  | 0.11      | 2.6                  | 2.5  | 0.00      |
| Diabetes mellitus                           | 8.0                   | 2.1  | 0.27      | 8.3                  | 2.1  | 0.28      |
| Gastroesophageal reflux disease             | <4.5                  | 0.6  | 0.03      | <1.6                 | 0.6  | -0.06     |
| Gastrointestinal hemorrhage                 | <4.5                  | 1.4  | -0.05     | <1.6                 | 1.4  | -0.13     |
| Hyperlipidemia                              | <4.5                  | 1.0  | -0.01     | <1.6                 | 1.0  | -0.10     |
| Hypertensive disorder                       | <4.5                  | 2.6  | 0.00      | <1.6                 | 2.6  | -0.15     |
| Obesity                                     | <4.5                  | 0.4  | 0.14      | 3.1                  | 0.4  | 0.21      |
| Osteoarthritis                              | <4.5                  | 4.6  | -0.05     | 7.4                  | 4.6  | 0.12      |
| Pneumonia                                   | <4.5                  | 1.1  | 0.17      | <1.6                 | 1.1  | -0.02     |
| Renal impairment                            | <4.5                  | 3.1  | -0.03     | <1.6                 | 3.2  | -0.18     |
| Rheumatoid arthritis                        | 33.9                  | 37.3 | -0.07     | 42.0                 | 37.4 | 0.09      |
| Urinary tract infectious disease            | <4.5                  | 4.5  | -0.16     | 5.2                  | 4.6  | 0.03      |
| Visual system disorder                      | 9.8                   | 8.3  | 0.05      | 10.2                 | 8.3  | 0.06      |
| Medical history: Cardiovascular disease     |                       |      |           |                      |      |           |
| Atrial fibrillation                         | <4.5                  | 1.1  | -0.02     | <1.6                 | 1.1  | -0.11     |
| Cerebrovascular disease                     | <4.5                  | 0.6  | 0.11      | <1.6                 | 0.6  | -0.02     |
| Heart disease                               | <4.5                  | 3.8  | -0.12     | <1.6                 | 3.8  | -0.23     |
| Venous thrombosis                           | <4.5                  | 0.8  | 0.01      | 6.7                  | 0.8  | 0.31      |
| Medical history: Neoplasms                  |                       |      |           |                      |      |           |
| Malignant lymphoma                          | <4.5                  | 0.1  | 0.11      | <1.6                 | 0.1  | 0.03      |
| Malignant neoplastic disease                | <4.5                  | 1.9  | 0.06      | 5.5                  | 1.9  | 0.19      |
| Malignant tumor of breast                   | <4.5                  | 0.2  | 0.09      | 5.0                  | 0.2  | 0.30      |
| Medication use                              |                       |      |           |                      |      |           |
| Antibacterials for systemic use             | 9.8                   | 4.6  | 0.20      | 2.6                  | 4.6  | -0.11     |
| Antidepressants                             | <4.5                  | 1.1  | 0.16      | <1.6                 | 1.1  | -0.02     |
| Antiinflammatory and antirheumatic products | <4.5                  | 1.2  | -0.03     | <1.6                 | 1.2  | -0.11     |
| Antineoplastic agents                       | <4.5                  | 1.6  | -0.06     | <1.6                 | 1.6  | -0.14     |
| Antithrombotic agents                       | <4.5                  | 1.4  | 0.10      | 3.3                  | 1.4  | 0.13      |
| Beta blocking agents                        | <4.5                  | 0.5  | 0.05      | <1.6                 | 0.5  | -0.04     |
| Diuretics                                   | <4.5                  | 1.0  | -0.01     | <1.6                 | 1.0  | -0.10     |
| Drugs for acid related disorders            | <4.5                  | 1.8  | -0.08     | <1.6                 | 1.8  | -0.16     |
| Drugs for obstructive airway diseases       | <4.5                  | 0.7  | 0.02      | <1.6                 | 0.7  | -0.07     |
| Immunosuppressants                          | <4.5                  | 1.8  | -0.08     | <1.6                 | 1.8  | -0.16     |
| Lipid modifying agents                      | <4.5                  | 1.3  | 0.10      | 3.3                  | 1.3  | 0.13      |



## S6.2.7. IPCI

| Characteristic                                | Before stratification |      |           | After stratification |      |           |
|-----------------------------------------------|-----------------------|------|-----------|----------------------|------|-----------|
|                                               | AZM                   | AMX  |           | AZM                  | AMX  |           |
|                                               | %                     | %    | Std. diff | %                    | %    | Std. diff |
| Age group                                     |                       |      |           |                      |      |           |
| 20-24                                         | <4.1                  | <1.0 | 0.05      | <4.1                 | <1.0 | 0.05      |
| 35-39                                         | <4.1                  | <1.0 | 0.19      | <4.1                 | <1.0 | 0.19      |
| 40-44                                         | 6.6                   | 4.6  | 0.09      | 6.6                  | 4.6  | 0.09      |
| 45-49                                         | 9.1                   | 6.6  | 0.09      | 9.1                  | 6.6  | 0.09      |
| 50-54                                         | 7.4                   | 6.8  | 0.02      | 7.4                  | 6.8  | 0.02      |
| 55-59                                         | 8.3                   | 11.0 | -0.09     | 8.3                  | 11.0 | -0.09     |
| 60-64                                         | 13.2                  | 14.9 | -0.05     | 13.2                 | 14.9 | -0.05     |
| 65-69                                         | 16.5                  | 10.6 | 0.18      | 16.5                 | 10.6 | 0.18      |
| 70-74                                         | 12.4                  | 13.5 | -0.03     | 12.4                 | 13.5 | -0.03     |
| 75-79                                         | 9.9                   | 11.8 | -0.06     | 9.9                  | 11.8 | -0.06     |
| 80-84                                         | 8.3                   | 8.9  | -0.02     | 8.3                  | 8.9  | -0.02     |
| 85-89                                         | <4.1                  | 6.8  | -0.16     | <4.1                 | 6.8  | -0.16     |
| Gender: female                                | 65.3                  | 72.0 | -0.15     | 65.3                 | 72.0 | -0.15     |
| Medical history: General                      |                       |      |           |                      |      |           |
| Acute respiratory disease                     | 37.2                  | 31.9 | 0.11      | 37.2                 | 31.9 | 0.11      |
| Depressive disorder                           | <4.1                  | 3.7  | -0.02     | <4.1                 | 3.7  | -0.02     |
| Diabetes mellitus                             | 6.6                   | 8.3  | -0.06     | 6.6                  | 8.3  | -0.06     |
| Gastrointestinal hemorrhage                   | <4.1                  | 1.7  | 0.06      | <4.1                 | 1.7  | 0.06      |
| Hyperlipidemia                                | <4.1                  | 2.7  | -0.14     | <4.1                 | 2.7  | -0.14     |
| Hypertensive disorder                         | 19.0                  | 17.6 | 0.04      | 19.0                 | 17.6 | 0.04      |
| Obesity                                       | <4.1                  | 1.4  | 0.12      | <4.1                 | 1.4  | 0.12      |
| Osteoarthritis                                | 4.1                   | 7.0  | -0.13     | 4.1                  | 7.0  | -0.13     |
| Pneumonia                                     | 14.9                  | 14.9 | 0.00      | 14.9                 | 14.9 | 0.00      |
| Renal impairment                              | <4.1                  | 3.5  | -0.06     | <4.1                 | 3.5  | -0.06     |
| Ulcerative colitis                            | <4.1                  | <1.0 | 0.15      | <4.1                 | <1.0 | 0.15      |
| Urinary tract infectious disease              | 9.9                   | 18.8 | -0.26     | 9.9                  | 18.8 | -0.26     |
| Visual system disorder                        | 21.5                  | 15.9 | 0.14      | 21.5                 | 15.9 | 0.14      |
| Medical history: Cardiovascular disease       |                       |      |           |                      |      |           |
| Atrial fibrillation                           | <4.1                  | 4.1  | -0.04     | <4.1                 | 4.1  | -0.04     |
| Cerebrovascular disease                       | <4.1                  | 2.7  | -0.01     | <4.1                 | 2.7  | -0.01     |
| Heart disease                                 | 12.4                  | 14.5 | -0.06     | 12.4                 | 14.5 | -0.06     |
| Heart failure                                 | 4.1                   | 3.5  | 0.03      | 4.1                  | 3.5  | 0.03      |
| Ischemic heart disease                        | 4.1                   | 6.0  | -0.08     | 4.1                  | 6.0  | -0.08     |
| Peripheral vascular disease                   | <4.1                  | 5.0  | -0.25     | <4.1                 | 5.0  | -0.25     |
| Venous thrombosis                             | <4.1                  | 1.0  | -0.02     | <4.1                 | <1.0 | -0.02     |
| Medical history: Neoplasms                    |                       |      |           |                      |      |           |
| Malignant neoplastic disease                  | 7.4                   | 7.7  | -0.01     | 7.4                  | 7.7  | -0.01     |
| Medication use                                |                       |      |           |                      |      |           |
| Agents acting on the renin-angiotensin system | 34.7                  | 35.4 | -0.02     | 34.7                 | 35.4 | -0.01     |
| Antibacterials for systemic use               | 48.8                  | 47.0 | 0.04      | 48.8                 | 47.0 | 0.04      |
| Antidepressants                               | 18.2                  | 19.9 | -0.04     | 18.2                 | 19.9 | -0.04     |
| Antiepileptics                                | 9.1                   | 8.9  | 0.01      | 9.1                  | 8.9  | 0.01      |
| Antiinflammatory and antirheumatic products   | 36.4                  | 41.8 | -0.11     | 36.4                 | 41.8 | -0.11     |
| Antineoplastic agents                         | 46.3                  | 48.4 | -0.04     | 46.3                 | 48.4 | -0.04     |
| Antipsoriatics                                | <4.1                  | 1.9  | -0.09     | <4.1                 | 1.9  | -0.09     |
| Antithrombotic agents                         | 30.6                  | 32.5 | -0.04     | 30.6                 | 32.5 | -0.04     |
| Beta blocking agents                          | 27.3                  | 31.9 | -0.10     | 27.3                 | 31.9 | -0.10     |
| Calcium channel blockers                      | 19.8                  | 20.3 | -0.01     | 19.8                 | 20.3 | -0.01     |
| Diuretics                                     | 32.2                  | 32.9 | -0.02     | 32.2                 | 32.9 | -0.02     |
| Drugs for acid related disorders              | 77.7                  | 80.3 | -0.06     | 77.7                 | 80.3 | -0.06     |
| Drugs for obstructive airway diseases         | 54.5                  | 42.0 | 0.25      | 54.5                 | 42.0 | 0.25      |
| Drugs used in diabetes                        | 13.2                  | 12.0 | 0.04      | 13.2                 | 12.0 | 0.04      |
| Immunosuppressants                            | 53.7                  | 52.4 | 0.03      | 53.7                 | 52.4 | 0.03      |
| Lipid modifying agents                        | 34.7                  | 38.1 | -0.07     | 34.7                 | 38.1 | -0.07     |
| Opioids                                       | 24.8                  | 28.8 | -0.09     | 24.8                 | 28.8 | -0.09     |
| Psycholeptics                                 | 33.9                  | 27.3 | 0.14      | 33.9                 | 27.3 | 0.14      |

Risk of hydroxychloroquine with azithromycin

| Characteristic                                        | Before stratification |      |           | After stratification |      |           |
|-------------------------------------------------------|-----------------------|------|-----------|----------------------|------|-----------|
|                                                       | AZM                   | AMX  |           | AZM                  | AMX  |           |
|                                                       | %                     | %    | Std. diff | %                    | %    | Std. diff |
| Psychostimulants, agents used for adhd and nootropics | <4.1                  | <1.0 | 0.15      | <4.1                 | <1.0 | 0.15      |

## S6.2.8. MDCD

| Characteristic                           | Before stratification |      |           | After stratification |      |           |
|------------------------------------------|-----------------------|------|-----------|----------------------|------|-----------|
|                                          | AZM                   | AMX  |           | AZM                  | AMX  |           |
|                                          | %                     | %    | Std. diff | %                    | %    | Std. diff |
| Age group                                |                       |      |           |                      |      |           |
| 15-19                                    | 1.3                   | 1.5  | -0.02     | 1.2                  | 1.5  | -0.02     |
| 20-24                                    | 2.4                   | 2.3  | 0.01      | 2.7                  | 2.3  | 0.03      |
| 25-29                                    | 4.5                   | 4.9  | -0.02     | 5.1                  | 4.5  | 0.03      |
| 30-34                                    | 6.1                   | 7.4  | -0.05     | 6.9                  | 7.0  | -0.01     |
| 35-39                                    | 9.1                   | 10.2 | -0.04     | 9.0                  | 9.5  | -0.02     |
| 40-44                                    | 10.5                  | 11.1 | -0.02     | 10.8                 | 10.7 | 0.00      |
| 45-49                                    | 13.1                  | 13.6 | -0.02     | 12.8                 | 13.7 | -0.03     |
| 50-54                                    | 16.5                  | 15.3 | 0.03      | 16.3                 | 16.0 | 0.01      |
| 55-59                                    | 15.6                  | 15.8 | -0.01     | 15.5                 | 16.2 | -0.02     |
| 60-64                                    | 12.3                  | 10.8 | 0.05      | 11.8                 | 11.0 | 0.02      |
| 65-69                                    | 4.3                   | 3.2  | 0.06      | 4.1                  | 3.5  | 0.03      |
| 70-74                                    | 2.2                   | 1.7  | 0.04      | 2.0                  | 1.8  | 0.02      |
| 85-89                                    | 0.3                   | 0.4  | 0.00      | 0.3                  | 0.4  | -0.02     |
| Gender: female                           | 89.1                  | 89.7 | -0.02     | 89.3                 | 89.9 | -0.02     |
| Race                                     |                       |      |           |                      |      |           |
| race = Black or African American         | 27.4                  | 29.9 | -0.06     | 27.5                 | 28.0 | -0.01     |
| race = White                             | 57.3                  | 54.2 | 0.06      | 56.9                 | 56.3 | 0.01      |
| Medical history: General                 |                       |      |           |                      |      |           |
| Acute respiratory disease                | 69.7                  | 54.0 | 0.33      | 61.4                 | 63.4 | -0.04     |
| Attention deficit hyperactivity disorder | 2.6                   | 2.6  | 0.00      | 2.7                  | 2.7  | 0.00      |
| Chronic liver disease                    | 6.5                   | 6.8  | -0.01     | 6.8                  | 6.8  | 0.00      |
| Chronic obstructive lung disease         | 28.0                  | 20.4 | 0.18      | 22.3                 | 25.6 | -0.08     |
| Crohn's disease                          | 1.1                   | 0.7  | 0.04      | 1.1                  | 0.7  | 0.04      |
| Dementia                                 | 1.2                   | 1.5  | -0.03     | 1.2                  | 1.6  | -0.03     |
| Depressive disorder                      | 39.9                  | 41.4 | -0.03     | 40.9                 | 41.1 | 0.00      |
| Diabetes mellitus                        | 26.6                  | 25.6 | 0.02      | 26.3                 | 26.1 | 0.00      |
| Gastroesophageal reflux disease          | 35.4                  | 33.9 | 0.03      | 34.5                 | 34.6 | 0.00      |
| Gastrointestinal hemorrhage              | 5.0                   | 5.8  | -0.04     | 5.1                  | 5.8  | -0.03     |
| Human immunodeficiency virus infection   | 0.3                   | 0.7  | -0.06     | 0.5                  | 0.6  | -0.02     |
| Hyperlipidemia                           | 38.8                  | 35.6 | 0.07      | 37.9                 | 37.0 | 0.02      |
| Hypertensive disorder                    | 59.2                  | 58.0 | 0.03      | 59.0                 | 59.4 | -0.01     |
| Lesion of liver                          | 1.3                   | 1.7  | -0.03     | 1.5                  | 1.9  | -0.03     |
| Obesity                                  | 23.3                  | 24.8 | -0.04     | 23.6                 | 24.0 | -0.01     |
| Osteoarthritis                           | 55.2                  | 55.1 | 0.00      | 54.6                 | 55.7 | -0.02     |
| Pneumonia                                | 15.9                  | 9.1  | 0.21      | 12.1                 | 12.4 | -0.01     |
| Psoriasis                                | 2.1                   | 1.9  | 0.01      | 2.2                  | 2.1  | 0.00      |
| Renal impairment                         | 11.6                  | 12.0 | -0.01     | 10.8                 | 12.0 | -0.04     |
| Rheumatoid arthritis                     | 81.8                  | 83.1 | -0.03     | 82.4                 | 83.2 | -0.02     |
| Schizophrenia                            | 1.6                   | 1.7  | -0.01     | 1.7                  | 1.7  | 0.00      |
| Ulcerative colitis                       | 0.5                   | 0.6  | -0.01     | 0.7                  | 0.6  | 0.01      |
| Urinary tract infectious disease         | 20.6                  | 22.1 | -0.04     | 21.3                 | 21.2 | 0.00      |
| Viral hepatitis C                        | 4.8                   | 5.5  | -0.03     | 5.5                  | 5.6  | 0.00      |
| Visual system disorder                   | 50.0                  | 50.4 | -0.01     | 50.1                 | 51.1 | -0.02     |
| Medical history: Cardiovascular disease  |                       |      |           |                      |      |           |
| Atrial fibrillation                      | 3.1                   | 2.8  | 0.02      | 2.8                  | 3.0  | -0.01     |
| Cerebrovascular disease                  | 5.9                   | 5.8  | 0.00      | 6.2                  | 6.1  | 0.00      |
| Coronary arteriosclerosis                | 11.3                  | 9.0  | 0.08      | 9.8                  | 10.0 | 0.00      |
| Heart disease                            | 35.0                  | 31.0 | 0.09      | 32.2                 | 33.2 | -0.02     |
| Heart failure                            | 10.9                  | 9.2  | 0.06      | 9.4                  | 10.5 | -0.04     |
| Ischemic heart disease                   | 9.4                   | 6.9  | 0.09      | 8.4                  | 7.5  | 0.04      |
| Peripheral vascular disease              | 4.6                   | 5.2  | -0.03     | 4.3                  | 5.2  | -0.04     |
| Pulmonary embolism                       | 2.6                   | 2.8  | -0.01     | 2.4                  | 2.9  | -0.04     |
| Venous thrombosis                        | 3.5                   | 3.9  | -0.02     | 3.6                  | 4.0  | -0.02     |
| Medical history: Neoplasms               |                       |      |           |                      |      |           |
| Hematologic neoplasm                     | 1.4                   | 1.5  | 0.00      | 1.5                  | 1.5  | -0.01     |
| Malignant lymphoma                       | 0.5                   | 0.5  | 0.01      | 0.6                  | 0.4  | 0.03      |

Risk of hydroxychloroquine with azithromycin

| Characteristic                                        | Before stratification |      |           | After stratification |      |           |
|-------------------------------------------------------|-----------------------|------|-----------|----------------------|------|-----------|
|                                                       | AZM                   | AMX  |           | AZM                  | AMX  |           |
|                                                       | %                     | %    | Std. diff | %                    | %    | Std. diff |
| Malignant neoplasm of anorectum                       | <0.1                  | 0.2  | -0.03     | 0.1                  | 0.2  | -0.02     |
| Malignant neoplastic disease                          | 7.2                   | 7.0  | 0.01      | 7.1                  | 6.9  | 0.01      |
| Malignant tumor of lung                               | 0.5                   | 0.6  | -0.01     | 0.4                  | 0.6  | -0.03     |
| Malignant tumor of urinary bladder                    | <0.1                  | <0.1 | 0.02      | <0.1                 | <0.1 | 0.02      |
| Primary malignant neoplasm of prostate                | <0.1                  | 0.2  | -0.02     | <0.1                 | 0.1  | -0.01     |
| Medication use                                        |                       |      |           |                      |      |           |
| Agents acting on the renin-angiotensin system         | 36.3                  | 34.4 | 0.04      | 35.0                 | 35.0 | 0.00      |
| Antibacterials for systemic use                       | 60.5                  | 59.7 | 0.02      | 60.1                 | 59.8 | 0.00      |
| Antidepressants                                       | 62.3                  | 61.3 | 0.02      | 62.3                 | 62.4 | 0.00      |
| Antiepileptics                                        | 51.0                  | 49.8 | 0.02      | 51.1                 | 50.2 | 0.02      |
| Antiinflammatory and antirheumatic products           | 56.8                  | 59.4 | -0.05     | 59.3                 | 58.0 | 0.03      |
| Antineoplastic agents                                 | 36.9                  | 34.2 | 0.06      | 36.0                 | 35.6 | 0.01      |
| Antipsoriatics                                        | 0.7                   | 1.0  | -0.03     | 0.6                  | 1.1  | -0.05     |
| Antithrombotic agents                                 | 22.8                  | 22.6 | 0.00      | 22.1                 | 22.9 | -0.02     |
| Beta blocking agents                                  | 28.6                  | 27.3 | 0.03      | 27.7                 | 28.3 | -0.01     |
| Calcium channel blockers                              | 23.4                  | 22.0 | 0.03      | 22.3                 | 22.7 | -0.01     |
| Diuretics                                             | 40.4                  | 37.6 | 0.06      | 39.1                 | 39.2 | 0.00      |
| Drugs for acid related disorders                      | 61.7                  | 59.8 | 0.04      | 60.3                 | 61.6 | -0.03     |
| Drugs for obstructive airway diseases                 | 65.5                  | 53.5 | 0.25      | 59.0                 | 60.3 | -0.03     |
| Drugs used in diabetes                                | 19.8                  | 18.8 | 0.02      | 19.5                 | 18.9 | 0.02      |
| Immunosuppressants                                    | 53.1                  | 49.4 | 0.07      | 51.5                 | 51.8 | 0.00      |
| Lipid modifying agents                                | 32.0                  | 30.2 | 0.04      | 31.0                 | 31.3 | -0.01     |
| Opioids                                               | 66.6                  | 68.3 | -0.04     | 67.6                 | 68.7 | -0.02     |
| Psycholeptics                                         | 58.0                  | 56.7 | 0.03      | 57.4                 | 57.6 | 0.00      |
| Psychostimulants, agents used for adhd and nootropics | 8.3                   | 7.7  | 0.02      | 8.2                  | 7.7  | 0.02      |

## S6.2.9. MDCR

| Characteristic                           | Before stratification |      |           | After stratification |      |           |
|------------------------------------------|-----------------------|------|-----------|----------------------|------|-----------|
|                                          | AZM                   | AMX  |           | AZM                  | AMX  |           |
|                                          | %                     | %    | Std. diff | %                    | %    | Std. diff |
| Age group                                |                       |      |           |                      |      |           |
| 45-49                                    | 0.1                   | 0.1  | 0.02      | 0.1                  | 0.1  | 0.02      |
| 55-59                                    | 1.0                   | 1.1  | 0.00      | 1.0                  | 1.2  | -0.02     |
| 60-64                                    | 2.1                   | 2.2  | -0.01     | 2.2                  | 2.3  | -0.01     |
| 65-69                                    | 29.2                  | 28.1 | 0.03      | 29.0                 | 28.7 | 0.01      |
| 70-74                                    | 27.7                  | 28.2 | -0.01     | 27.8                 | 28.0 | 0.00      |
| 75-79                                    | 19.6                  | 20.2 | -0.01     | 19.8                 | 20.0 | 0.00      |
| 80-84                                    | 12.3                  | 13.0 | -0.02     | 12.4                 | 12.6 | -0.01     |
| 85-89                                    | 5.8                   | 5.3  | 0.02      | 5.7                  | 5.3  | 0.02      |
| 90-94                                    | 1.4                   | 1.4  | 0.00      | 1.4                  | 1.3  | 0.01      |
| 95-99                                    | 0.1                   | 0.2  | -0.01     | 0.1                  | 0.2  | -0.02     |
| Gender: female                           | 78.1                  | 74.0 | 0.10      | 75.7                 | 75.7 | 0.00      |
| Medical history: General                 |                       |      |           |                      |      |           |
| Acute respiratory disease                | 53.3                  | 34.2 | 0.39      | 42.5                 | 44.4 | -0.04     |
| Attention deficit hyperactivity disorder | 0.1                   | 0.2  | -0.01     | 0.1                  | 0.2  | -0.01     |
| Chronic liver disease                    | 1.7                   | 2.0  | -0.03     | 1.7                  | 2.1  | -0.03     |
| Chronic obstructive lung disease         | 20.3                  | 14.7 | 0.15      | 16.7                 | 18.1 | -0.04     |
| Crohn's disease                          | 0.6                   | 0.5  | 0.02      | 0.7                  | 0.5  | 0.03      |
| Dementia                                 | 2.1                   | 2.3  | -0.02     | 2.2                  | 2.3  | 0.00      |
| Depressive disorder                      | 10.4                  | 11.0 | -0.02     | 10.3                 | 11.0 | -0.02     |
| Diabetes mellitus                        | 20.7                  | 20.7 | 0.00      | 20.6                 | 20.4 | 0.00      |
| Gastroesophageal reflux disease          | 19.4                  | 18.8 | 0.02      | 19.2                 | 19.7 | -0.01     |
| Gastrointestinal hemorrhage              | 4.4                   | 5.1  | -0.03     | 4.6                  | 5.0  | -0.02     |
| Human immunodeficiency virus infection   | <0.1                  | 0.1  | -0.02     | <0.1                 | 0.1  | -0.02     |
| Hyperlipidemia                           | 39.1                  | 40.0 | -0.02     | 39.8                 | 39.7 | 0.00      |
| Hypertensive disorder                    | 62.2                  | 61.6 | 0.01      | 61.9                 | 61.4 | 0.01      |
| Lesion of liver                          | 0.9                   | 1.1  | -0.02     | 0.9                  | 1.1  | -0.02     |
| Obesity                                  | 5.5                   | 6.3  | -0.04     | 5.8                  | 6.2  | -0.02     |
| Osteoarthritis                           | 53.3                  | 57.7 | -0.09     | 56.1                 | 55.5 | 0.01      |
| Pneumonia                                | 14.3                  | 9.2  | 0.16      | 11.6                 | 12.0 | -0.01     |
| Psoriasis                                | 2.0                   | 2.4  | -0.03     | 2.2                  | 2.4  | -0.02     |
| Renal impairment                         | 12.6                  | 12.5 | 0.00      | 12.7                 | 12.5 | 0.01      |
| Rheumatoid arthritis                     | 87.0                  | 86.5 | 0.02      | 86.7                 | 86.6 | 0.00      |
| Schizophrenia                            | <0.1                  | 0.1  | -0.01     | <0.1                 | 0.1  | -0.01     |
| Ulcerative colitis                       | 0.7                   | 0.7  | -0.01     | 0.6                  | 0.7  | -0.01     |
| Urinary tract infectious disease         | 15.2                  | 17.1 | -0.05     | 15.6                 | 16.1 | -0.01     |
| Viral hepatitis C                        | 0.4                   | 0.5  | -0.02     | 0.4                  | 0.5  | -0.01     |
| Visual system disorder                   | 61.5                  | 61.0 | 0.01      | 61.3                 | 60.8 | 0.01      |
| Medical history: Cardiovascular disease  |                       |      |           |                      |      |           |
| Atrial fibrillation                      | 9.6                   | 11.3 | -0.06     | 10.3                 | 10.6 | -0.01     |
| Cerebrovascular disease                  | 12.0                  | 11.3 | 0.02      | 11.8                 | 11.3 | 0.02      |
| Coronary arteriosclerosis                | 19.8                  | 20.3 | -0.01     | 20.7                 | 20.5 | 0.01      |
| Heart disease                            | 44.9                  | 46.4 | -0.03     | 45.7                 | 46.0 | -0.01     |
| Heart failure                            | 11.9                  | 10.5 | 0.04      | 11.4                 | 11.2 | 0.01      |
| Ischemic heart disease                   | 10.5                  | 10.0 | 0.02      | 10.7                 | 10.2 | 0.02      |
| Peripheral vascular disease              | 6.3                   | 6.4  | 0.00      | 6.5                  | 6.0  | 0.02      |
| Pulmonary embolism                       | 1.4                   | 1.4  | 0.01      | 1.5                  | 1.3  | 0.02      |
| Venous thrombosis                        | 3.2                   | 3.8  | -0.04     | 3.5                  | 3.7  | -0.02     |
| Medical history: Neoplasms               |                       |      |           |                      |      |           |
| Hematologic neoplasm                     | 2.0                   | 2.3  | -0.02     | 2.1                  | 2.2  | -0.01     |
| Malignant lymphoma                       | 1.5                   | 1.4  | 0.01      | 1.6                  | 1.4  | 0.02      |
| Malignant neoplasm of anorectum          | 0.3                   | 0.4  | -0.02     | 0.3                  | 0.4  | -0.02     |
| Malignant neoplastic disease             | 18.8                  | 19.7 | -0.02     | 19.4                 | 19.1 | 0.01      |
| Malignant tumor of breast                | 4.1                   | 3.9  | 0.01      | 4.3                  | 3.9  | 0.02      |
| Malignant tumor of colon                 | 0.6                   | 0.8  | -0.02     | 0.7                  | 0.8  | -0.01     |
| Malignant tumor of lung                  | 0.8                   | 0.9  | -0.01     | 0.8                  | 1.0  | -0.03     |
| Malignant tumor of urinary bladder       | 0.9                   | 0.9  | 0.00      | 0.9                  | 0.9  | 0.00      |

Risk of hydroxychloroquine with azithromycin

| Characteristic                                        | Before stratification |      |           | After stratification |      |           |
|-------------------------------------------------------|-----------------------|------|-----------|----------------------|------|-----------|
|                                                       | AZM                   | AMX  |           | AZM                  | AMX  |           |
|                                                       | %                     | %    | Std. diff | %                    | %    | Std. diff |
| Primary malignant neoplasm of prostate                | 1.9                   | 2.4  | -0.03     | 2.2                  | 2.1  | 0.01      |
| Medication use                                        |                       |      |           |                      |      |           |
| Agents acting on the renin-angiotensin system         | 48.0                  | 47.7 | 0.00      | 47.7                 | 48.3 | -0.01     |
| Antibacterials for systemic use                       | 53.1                  | 51.8 | 0.03      | 52.4                 | 52.7 | -0.01     |
| Antidepressants                                       | 36.6                  | 35.7 | 0.02      | 36.2                 | 37.1 | -0.02     |
| Antiepileptics                                        | 23.7                  | 23.4 | 0.01      | 23.9                 | 23.7 | 0.01      |
| Antiinflammatory and antirheumatic products           | 37.0                  | 41.3 | -0.09     | 40.3                 | 39.5 | 0.02      |
| Antineoplastic agents                                 | 37.1                  | 36.1 | 0.02      | 36.5                 | 37.2 | -0.02     |
| Antipsoriatics                                        | 1.3                   | 1.2  | 0.01      | 1.3                  | 1.3  | 0.00      |
| Antithrombotic agents                                 | 23.3                  | 26.2 | -0.07     | 24.7                 | 24.6 | 0.00      |
| Beta blocking agents                                  | 40.3                  | 41.7 | -0.03     | 41.4                 | 41.0 | 0.01      |
| Calcium channel blockers                              | 30.5                  | 29.5 | 0.02      | 30.2                 | 29.9 | 0.01      |
| Diuretics                                             | 48.1                  | 47.5 | 0.01      | 47.6                 | 48.4 | -0.02     |
| Drugs for acid related disorders                      | 52.0                  | 49.7 | 0.05      | 51.2                 | 51.6 | -0.01     |
| Drugs for obstructive airway diseases                 | 49.3                  | 36.0 | 0.27      | 41.8                 | 43.0 | -0.02     |
| Drugs used in diabetes                                | 15.5                  | 15.1 | 0.01      | 15.5                 | 15.1 | 0.01      |
| Immunosuppressants                                    | 49.6                  | 47.6 | 0.04      | 48.5                 | 49.3 | -0.02     |
| Lipid modifying agents                                | 47.4                  | 47.6 | 0.00      | 48.0                 | 47.9 | 0.00      |
| Opioids                                               | 41.9                  | 44.9 | -0.06     | 42.9                 | 43.2 | 0.00      |
| Psycholeptics                                         | 38.7                  | 37.1 | 0.03      | 37.9                 | 38.2 | -0.01     |
| Psychostimulants, agents used for adhd and nootropics | 2.3                   | 2.6  | -0.02     | 2.4                  | 2.7  | -0.02     |

## S6.2.10. OpenClaims

| Characteristic                           | Before stratification |      |           | After stratification |      |           |
|------------------------------------------|-----------------------|------|-----------|----------------------|------|-----------|
|                                          | AZM                   | AMX  |           | AZM                  | AMX  |           |
|                                          | %                     | %    | Std. diff | %                    | %    | Std. diff |
| Age group                                |                       |      |           |                      |      |           |
| 15-19                                    | 0.3                   | 0.3  | 0.00      | 0.3                  | 0.3  | 0.00      |
| 20-24                                    | 1.0                   | 1.0  | 0.00      | 1.0                  | 1.0  | 0.00      |
| 25-29                                    | 1.8                   | 1.7  | 0.00      | 1.8                  | 1.8  | 0.00      |
| 30-34                                    | 3.0                   | 2.9  | 0.01      | 3.0                  | 2.9  | 0.00      |
| 40-44                                    | 6.1                   | 5.7  | 0.02      | 6.0                  | 5.9  | 0.00      |
| 50-54                                    | 11.7                  | 11.1 | 0.02      | 11.5                 | 11.5 | 0.00      |
| 55-59                                    | 14.0                  | 13.9 | 0.00      | 14.0                 | 14.0 | 0.00      |
| 60-64                                    | 13.8                  | 14.1 | -0.01     | 13.9                 | 14.1 | 0.00      |
| 65-69                                    | 12.4                  | 13.0 | -0.02     | 12.7                 | 12.7 | 0.00      |
| 80-84                                    | 4.0                   | 4.6  | -0.03     | 4.3                  | 4.2  | 0.00      |
| 85-89                                    | 0.2                   | 0.2  | 0.00      | 0.2                  | 0.2  | 0.01      |
| Gender: female                           | 84.7                  | 82.1 | 0.07      | 83.5                 | 83.5 | 0.00      |
| Medical history: General                 |                       |      |           |                      |      |           |
| Acute respiratory disease                | 36.6                  | 27.3 | 0.20      | 33.1                 | 31.5 | 0.03      |
| Attention deficit hyperactivity disorder | 0.9                   | 0.8  | 0.00      | 0.9                  | 0.8  | 0.00      |
| Chronic liver disease                    | 2.1                   | 2.2  | -0.01     | 2.2                  | 2.2  | 0.00      |
| Chronic obstructive lung disease         | 10.6                  | 8.0  | 0.09      | 9.4                  | 9.3  | 0.00      |
| Crohn's disease                          | 0.5                   | 0.5  | 0.00      | 0.5                  | 0.5  | 0.00      |
| Dementia                                 | 0.9                   | 1.0  | -0.01     | 0.9                  | 0.9  | 0.00      |
| Depressive disorder                      | 11.3                  | 11.6 | -0.01     | 11.7                 | 11.5 | 0.01      |
| Diabetes mellitus                        | 16.5                  | 16.9 | -0.01     | 16.8                 | 16.7 | 0.00      |
| Gastroesophageal reflux disease          | 5.5                   | 6.4  | -0.04     | 6.0                  | 5.9  | 0.00      |
| Gastrointestinal hemorrhage              | 2.5                   | 2.7  | -0.01     | 2.6                  | 2.6  | 0.00      |
| Hyperlipidemia                           | 26.6                  | 27.3 | -0.02     | 27.1                 | 26.8 | 0.01      |
| Hypertensive disorder                    | 37.0                  | 38.1 | -0.02     | 37.9                 | 37.4 | 0.01      |
| Lesion of liver                          | 0.8                   | 0.9  | -0.01     | 0.9                  | 0.9  | 0.00      |
| Obesity                                  | 7.6                   | 7.8  | -0.01     | 7.8                  | 7.7  | 0.00      |
| Osteoarthritis                           | 35.5                  | 38.0 | -0.05     | 37.0                 | 36.6 | 0.01      |
| Pneumonia                                | 7.1                   | 4.8  | 0.10      | 6.1                  | 5.8  | 0.01      |
| Psoriasis                                | 1.9                   | 1.9  | 0.00      | 2.0                  | 1.9  | 0.00      |
| Renal impairment                         | 7.2                   | 7.7  | -0.02     | 7.5                  | 7.5  | 0.00      |
| Rheumatoid arthritis                     | 68.4                  | 67.8 | 0.01      | 68.1                 | 68.0 | 0.00      |
| Schizophrenia                            | 0.2                   | 0.2  | 0.01      | 0.2                  | 0.2  | 0.01      |
| Ulcerative colitis                       | 0.5                   | 0.5  | 0.00      | 0.5                  | 0.5  | 0.00      |
| Urinary tract infectious disease         | 10.0                  | 11.0 | -0.03     | 10.6                 | 10.5 | 0.00      |
| Viral hepatitis C                        | 1.0                   | 1.1  | -0.01     | 1.0                  | 1.0  | 0.00      |
| Visual system disorder                   | 26.7                  | 27.3 | -0.01     | 27.1                 | 27.0 | 0.00      |
| Medical history: Cardiovascular disease  |                       |      |           |                      |      |           |
| Atrial fibrillation                      | 3.5                   | 4.4  | -0.05     | 4.0                  | 4.0  | 0.00      |
| Cerebrovascular disease                  | 3.5                   | 3.5  | 0.00      | 3.6                  | 3.5  | 0.00      |
| Coronary arteriosclerosis                | 7.3                   | 7.7  | -0.02     | 7.7                  | 7.6  | 0.00      |
| Heart disease                            | 19.8                  | 20.8 | -0.02     | 20.4                 | 20.3 | 0.00      |
| Ischemic heart disease                   | 3.9                   | 3.9  | 0.00      | 4.0                  | 3.9  | 0.00      |
| Peripheral vascular disease              | 10.4                  | 11.2 | -0.03     | 11.0                 | 10.8 | 0.00      |
| Pulmonary embolism                       | 0.9                   | 1.0  | -0.01     | 1.0                  | 1.0  | 0.00      |
| Venous thrombosis                        | 1.6                   | 1.8  | -0.01     | 1.7                  | 1.7  | 0.00      |
| Medical history: Neoplasms               |                       |      |           |                      |      |           |
| Hematologic neoplasm                     | 1.0                   | 1.1  | -0.01     | 1.1                  | 1.1  | 0.00      |
| Malignant lymphoma                       | 0.7                   | 0.7  | 0.00      | 0.7                  | 0.7  | 0.00      |
| Malignant neoplasm of anorectum          | 0.1                   | 0.1  | 0.00      | 0.1                  | 0.1  | 0.00      |
| Malignant neoplastic disease             | 8.0                   | 8.4  | -0.01     | 8.3                  | 8.2  | 0.00      |
| Malignant tumor of breast                | 2.1                   | 2.1  | 0.00      | 2.2                  | 2.1  | 0.00      |
| Malignant tumor of colon                 | 0.3                   | 0.3  | -0.01     | 0.3                  | 0.3  | 0.00      |
| Malignant tumor of lung                  | 0.4                   | 0.3  | 0.01      | 0.4                  | 0.4  | 0.00      |
| Malignant tumor of urinary bladder       | 0.2                   | 0.3  | -0.01     | 0.2                  | 0.3  | 0.00      |
| Primary malignant neoplasm of prostate   | 0.6                   | 0.7  | -0.01     | 0.6                  | 0.6  | 0.00      |

## Risk of hydroxychloroquine with azithromycin

| Characteristic                                        | Before stratification |      |           | After stratification |      |           |
|-------------------------------------------------------|-----------------------|------|-----------|----------------------|------|-----------|
|                                                       | AZM                   | AMX  |           | AZM                  | AMX  |           |
|                                                       | %                     | %    | Std. diff | %                    | %    | Std. diff |
| Medication use                                        |                       |      |           |                      |      |           |
| Agents acting on the renin-angiotensin system         | 37.3                  | 38.2 | -0.02     | 38.0                 | 37.9 | 0.00      |
| Antibacterials for systemic use                       | 49.3                  | 49.7 | -0.01     | 49.9                 | 49.9 | 0.00      |
| Antidepressants                                       | 45.6                  | 45.4 | 0.00      | 46.0                 | 45.8 | 0.00      |
| Antiepileptics                                        | 32.9                  | 33.3 | -0.01     | 33.5                 | 33.3 | 0.00      |
| Antiinflammatory and antirheumatic products           | 45.3                  | 47.7 | -0.05     | 46.8                 | 46.6 | 0.00      |
| Antineoplastic agents                                 | 38.6                  | 35.9 | 0.06      | 37.0                 | 37.3 | 0.00      |
| Antithrombotic agents                                 | 15.7                  | 18.3 | -0.07     | 17.2                 | 17.0 | 0.00      |
| Beta blocking agents                                  | 28.8                  | 30.2 | -0.03     | 29.7                 | 29.6 | 0.00      |
| Calcium channel blockers                              | 21.7                  | 22.0 | -0.01     | 22.0                 | 21.9 | 0.00      |
| Diuretics                                             | 35.6                  | 35.8 | 0.00      | 35.9                 | 35.9 | 0.00      |
| Drugs for acid related disorders                      | 47.6                  | 47.4 | 0.00      | 47.7                 | 47.8 | 0.00      |
| Drugs for obstructive airway diseases                 | 50.2                  | 40.6 | 0.19      | 45.8                 | 45.5 | 0.01      |
| Immunosuppressants                                    | 52.8                  | 50.2 | 0.05      | 51.4                 | 51.5 | 0.00      |
| Lipid modifying agents                                | 34.8                  | 35.9 | -0.02     | 35.6                 | 35.5 | 0.00      |
| Opioids                                               | 41.8                  | 44.3 | -0.05     | 43.5                 | 43.2 | 0.01      |
| Psycholeptics                                         | 39.2                  | 38.4 | 0.02      | 39.3                 | 39.2 | 0.00      |
| Psychostimulants, agents used for adhd and nootropics | 6.7                   | 6.5  | 0.01      | 6.8                  | 6.7  | 0.00      |



## S6.2.11. OptumEHR

| Characteristic                           | Before stratification |      |           | After stratification |      |           |
|------------------------------------------|-----------------------|------|-----------|----------------------|------|-----------|
|                                          | AZM                   | AMX  |           | AZM                  | AMX  |           |
|                                          | %                     | %    | Std. diff | %                    | %    | Std. diff |
| Age group                                |                       |      |           |                      |      |           |
| 15-19                                    | 0.2                   | 0.3  | -0.02     | 0.2                  | 0.3  | -0.02     |
| 20-24                                    | 0.9                   | 0.9  | 0.00      | 1.1                  | 0.8  | 0.03      |
| 25-29                                    | 1.6                   | 1.7  | 0.00      | 1.9                  | 1.6  | 0.02      |
| 30-34                                    | 2.7                   | 3.1  | -0.03     | 2.9                  | 2.9  | 0.00      |
| 35-39                                    | 3.7                   | 4.5  | -0.04     | 4.1                  | 4.1  | 0.00      |
| 40-44                                    | 5.3                   | 5.9  | -0.03     | 5.7                  | 6.0  | -0.01     |
| 45-49                                    | 7.1                   | 7.4  | -0.01     | 7.3                  | 7.4  | 0.00      |
| 50-54                                    | 10.5                  | 10.5 | 0.00      | 10.5                 | 10.3 | 0.01      |
| 55-59                                    | 13.1                  | 13.8 | -0.02     | 13.2                 | 13.9 | -0.02     |
| 60-64                                    | 13.7                  | 13.6 | 0.00      | 13.9                 | 13.8 | 0.00      |
| 65-69                                    | 12.6                  | 12.2 | 0.01      | 12.4                 | 12.5 | 0.00      |
| 70-74                                    | 10.9                  | 10.5 | 0.01      | 10.5                 | 10.6 | 0.00      |
| 75-79                                    | 8.6                   | 7.6  | 0.04      | 8.2                  | 7.9  | 0.01      |
| 80-84                                    | 6.4                   | 6.0  | 0.02      | 5.9                  | 5.8  | 0.00      |
| 85-89                                    | 2.6                   | 2.1  | 0.04      | 2.3                  | 2.0  | 0.02      |
| Gender: female                           | 82.3                  | 82.1 | 0.00      | 82.9                 | 82.7 | 0.01      |
| Race                                     |                       |      |           |                      |      |           |
| race = Asian                             | 1.1                   | 1.0  | 0.01      | 1.0                  | 1.0  | 0.01      |
| race = Black or African American         | 10.5                  | 9.4  | 0.04      | 10.0                 | 9.4  | 0.02      |
| race = White                             | 83.4                  | 84.3 | -0.02     | 84.1                 | 84.4 | -0.01     |
| Ethnicity                                |                       |      |           |                      |      |           |
| ethnicity = Hispanic or Latino           | 4.6                   | 4.4  | 0.01      | 4.5                  | 4.5  | 0.00      |
| Medical history: General                 |                       |      |           |                      |      |           |
| Acute respiratory disease                | 57.2                  | 43.2 | 0.28      | 52.6                 | 51.8 | 0.02      |
| Attention deficit hyperactivity disorder | 1.0                   | 1.5  | -0.04     | 1.1                  | 1.4  | -0.03     |
| Chronic liver disease                    | 3.3                   | 3.4  | -0.01     | 3.4                  | 3.4  | 0.00      |
| Chronic obstructive lung disease         | 19.5                  | 11.0 | 0.24      | 15.2                 | 15.1 | 0.00      |
| Crohn's disease                          | 0.6                   | 0.6  | 0.00      | 0.7                  | 0.5  | 0.02      |
| Dementia                                 | 2.2                   | 1.9  | 0.02      | 1.9                  | 1.9  | 0.00      |
| Depressive disorder                      | 23.7                  | 23.4 | 0.01      | 23.9                 | 23.4 | 0.01      |
| Diabetes mellitus                        | 19.3                  | 18.3 | 0.03      | 18.8                 | 18.4 | 0.01      |
| Gastroesophageal reflux disease          | 29.6                  | 28.1 | 0.03      | 29.2                 | 28.8 | 0.01      |
| Human immunodeficiency virus infection   | 0.2                   | 0.1  | 0.01      | 0.2                  | 0.2  | 0.00      |
| Hyperlipidemia                           | 40.8                  | 38.8 | 0.04      | 39.7                 | 39.4 | 0.01      |
| Hypertensive disorder                    | 51.4                  | 49.7 | 0.03      | 50.4                 | 50.4 | 0.00      |
| Lesion of liver                          | 1.5                   | 1.5  | 0.00      | 1.6                  | 1.4  | 0.01      |
| Obesity                                  | 17.5                  | 18.1 | -0.02     | 17.6                 | 17.8 | -0.01     |
| Osteoarthritis                           | 41.1                  | 42.2 | -0.02     | 41.4                 | 41.0 | 0.01      |
| Pneumonia                                | 20.6                  | 7.6  | 0.38      | 14.7                 | 12.4 | 0.07      |
| Psoriasis                                | 2.1                   | 2.1  | 0.00      | 2.2                  | 2.1  | 0.01      |
| Renal impairment                         | 14.7                  | 12.8 | 0.06      | 13.2                 | 12.6 | 0.02      |
| Rheumatoid arthritis                     | 84.8                  | 83.4 | 0.04      | 84.0                 | 84.3 | -0.01     |
| Schizophrenia                            | 0.3                   | 0.3  | -0.01     | 0.2                  | 0.3  | -0.01     |
| Ulcerative colitis                       | 0.5                   | 0.7  | -0.03     | 0.6                  | 0.6  | 0.00      |
| Urinary tract infectious disease         | 13.1                  | 14.1 | -0.03     | 13.7                 | 13.2 | 0.02      |
| Viral hepatitis C                        | 1.3                   | 1.1  | 0.02      | 1.3                  | 1.1  | 0.01      |
| Visual system disorder                   | 21.4                  | 22.6 | -0.03     | 21.5                 | 21.6 | 0.00      |
| Medical history: Cardiovascular disease  |                       |      |           |                      |      |           |
| Atrial fibrillation                      | 7.5                   | 6.9  | 0.02      | 6.9                  | 7.1  | -0.01     |
| Cerebrovascular disease                  | 5.1                   | 4.5  | 0.03      | 4.8                  | 4.5  | 0.01      |
| Coronary arteriosclerosis                | 13.4                  | 12.1 | 0.04      | 12.5                 | 12.5 | 0.00      |
| Heart disease                            | 33.3                  | 29.6 | 0.08      | 31.1                 | 30.3 | 0.02      |
| Heart failure                            | 11.3                  | 8.0  | 0.12      | 9.4                  | 8.6  | 0.03      |
| Ischemic heart disease                   | 8.0                   | 6.7  | 0.05      | 7.2                  | 7.0  | 0.01      |
| Pulmonary embolism                       | 1.7                   | 1.8  | -0.01     | 1.7                  | 1.7  | 0.00      |
| Venous thrombosis                        | 3.3                   | 3.4  | -0.01     | 3.3                  | 3.1  | 0.01      |

Risk of hydroxychloroquine with azithromycin

| Characteristic                                        | Before stratification |      |           | After stratification |      |           |
|-------------------------------------------------------|-----------------------|------|-----------|----------------------|------|-----------|
|                                                       | AZM                   | AMX  |           | AZM                  | AMX  |           |
|                                                       | %                     | %    | Std. diff | %                    | %    | Std. diff |
| Medical history: Neoplasms                            |                       |      |           |                      |      |           |
| Hematologic neoplasm                                  | 1.7                   | 1.7  | 0.00      | 1.8                  | 1.6  | 0.01      |
| Malignant lymphoma                                    | 0.8                   | 1.0  | -0.02     | 0.8                  | 0.9  | -0.02     |
| Malignant neoplasm of anorectum                       | 0.4                   | 0.5  | -0.02     | 0.3                  | 0.4  | 0.00      |
| Malignant neoplastic disease                          | 11.8                  | 13.3 | -0.05     | 12.2                 | 12.5 | -0.01     |
| Malignant tumor of breast                             | 2.5                   | 3.1  | -0.03     | 2.7                  | 2.8  | -0.01     |
| Malignant tumor of colon                              | 0.5                   | 0.6  | -0.01     | 0.5                  | 0.5  | 0.01      |
| Malignant tumor of lung                               | 1.0                   | 0.7  | 0.04      | 0.9                  | 0.9  | -0.01     |
| Malignant tumor of urinary bladder                    | 0.3                   | 0.4  | -0.02     | 0.3                  | 0.3  | -0.01     |
| Primary malignant neoplasm of prostate                | 0.8                   | 0.8  | 0.00      | 0.9                  | 0.7  | 0.02      |
| Medication use                                        |                       |      |           |                      |      |           |
| Agents acting on the renin-angiotensin system         | 37.6                  | 36.5 | 0.02      | 36.9                 | 36.5 | 0.01      |
| Antibacterials for systemic use                       | 53.0                  | 51.6 | 0.03      | 52.1                 | 50.8 | 0.03      |
| Antidepressants                                       | 47.6                  | 48.1 | -0.01     | 48.1                 | 48.3 | 0.00      |
| Antiepileptics                                        | 33.3                  | 34.7 | -0.03     | 33.8                 | 34.1 | 0.00      |
| Antiinflammatory and antirheumatic products           | 47.1                  | 50.6 | -0.07     | 48.8                 | 49.7 | -0.02     |
| Antineoplastic agents                                 | 39.5                  | 36.8 | 0.06      | 38.1                 | 38.6 | -0.01     |
| Antithrombotic agents                                 | 47.7                  | 44.7 | 0.06      | 45.4                 | 44.1 | 0.03      |
| Beta blocking agents                                  | 35.2                  | 35.8 | -0.01     | 35.0                 | 34.9 | 0.00      |
| Calcium channel blockers                              | 24.0                  | 22.2 | 0.04      | 22.9                 | 22.8 | 0.00      |
| Diuretics                                             | 40.3                  | 38.3 | 0.04      | 39.3                 | 38.9 | 0.01      |
| Drugs for acid related disorders                      | 61.8                  | 61.0 | 0.02      | 61.0                 | 61.0 | 0.00      |
| Drugs for obstructive airway diseases                 | 64.7                  | 52.3 | 0.25      | 58.6                 | 59.1 | -0.01     |
| Drugs used in diabetes                                | 19.7                  | 19.2 | 0.02      | 19.1                 | 19.1 | 0.00      |
| Immunosuppressants                                    | 56.0                  | 53.6 | 0.05      | 55.1                 | 55.5 | -0.01     |
| Lipid modifying agents                                | 37.0                  | 36.1 | 0.02      | 36.2                 | 35.9 | 0.01      |
| Opioids                                               | 52.5                  | 53.9 | -0.03     | 52.3                 | 52.2 | 0.00      |
| Psycholeptics                                         | 49.8                  | 49.6 | 0.00      | 49.2                 | 49.5 | -0.01     |
| Psychostimulants, agents used for adhd and nootropics | 5.6                   | 6.6  | -0.04     | 6.0                  | 6.3  | -0.01     |

## S6.2.12. SIDIAP

| Characteristic                                | Before stratification |      |           | After stratification |      |           |
|-----------------------------------------------|-----------------------|------|-----------|----------------------|------|-----------|
|                                               | AZM                   | AMX  |           | AZM                  | AMX  |           |
|                                               | %                     | %    | Std. diff | %                    | %    | Std. diff |
| Age group                                     |                       |      |           |                      |      |           |
| 20-24                                         | <3.8                  | <0.7 | 0.09      | <2.8                 | <0.7 | 0.07      |
| 30-34                                         | <3.8                  | 4.1  | -0.10     | <2.8                 | 4.0  | -0.12     |
| 35-39                                         | 3.8                   | 5.5  | -0.08     | 6.1                  | 5.4  | 0.03      |
| 40-44                                         | 6.2                   | 6.3  | 0.00      | 3.3                  | 6.1  | -0.13     |
| 45-49                                         | 4.6                   | 6.0  | -0.06     | 5.7                  | 5.8  | -0.01     |
| 50-54                                         | 13.1                  | 8.3  | 0.16      | 17.6                 | 8.3  | 0.28      |
| 55-59                                         | 15.4                  | 10.3 | 0.15      | 17.5                 | 10.5 | 0.20      |
| 60-64                                         | 10.8                  | 12.7 | -0.06     | 12.9                 | 12.9 | 0.00      |
| 65-69                                         | 7.7                   | 12.2 | -0.15     | 5.0                  | 12.5 | -0.27     |
| 70-74                                         | 12.3                  | 11.1 | 0.04      | 10.0                 | 11.0 | -0.03     |
| 75-79                                         | 7.7                   | 8.9  | -0.04     | 4.5                  | 8.6  | -0.17     |
| 80-84                                         | 7.7                   | 8.2  | -0.02     | 9.0                  | 8.3  | 0.03      |
| 85-89                                         | 6.2                   | 3.1  | 0.15      | 4.0                  | 3.3  | 0.03      |
| 90-94                                         | <3.8                  | <0.7 | 0.09      | <2.8                 | <0.7 | 0.12      |
| Gender: female                                | 80.0                  | 77.6 | 0.06      | 79.9                 | 77.9 | 0.05      |
| Medical history: General                      |                       |      |           |                      |      |           |
| Acute respiratory disease                     | 26.9                  | 20.1 | 0.16      | 29.4                 | 20.6 | 0.20      |
| Chronic liver disease                         | <3.8                  | 1.2  | -0.04     | <2.8                 | 1.2  | -0.09     |
| Chronic obstructive lung disease              | 4.6                   | 2.6  | 0.11      | 3.7                  | 2.7  | 0.05      |
| Dementia                                      | <3.8                  | 0.9  | -0.01     | <2.8                 | 0.9  | -0.06     |
| Depressive disorder                           | <3.8                  | 4.7  | -0.08     | <2.8                 | 4.9  | -0.11     |
| Diabetes mellitus                             | <3.8                  | 3.6  | -0.13     | <2.8                 | 3.5  | -0.10     |
| Gastroesophageal reflux disease               | <3.8                  | 1.3  | 0.02      | <2.8                 | 1.3  | -0.04     |
| Gastrointestinal hemorrhage                   | 5.4                   | 2.0  | 0.18      | 5.5                  | 2.1  | 0.18      |
| Hyperlipidemia                                | 4.6                   | 6.4  | -0.08     | 3.8                  | 6.3  | -0.12     |
| Hypertensive disorder                         | 6.2                   | 7.1  | -0.04     | 6.3                  | 7.0  | -0.03     |
| Obesity                                       | 7.7                   | 8.0  | -0.01     | 9.8                  | 7.9  | 0.07      |
| Osteoarthritis                                | 4.6                   | 3.8  | 0.04      | 5.2                  | 3.7  | 0.07      |
| Pneumonia                                     | <3.8                  | 3.4  | -0.06     | <2.8                 | 3.4  | -0.14     |
| Renal impairment                              | <3.8                  | 2.9  | -0.04     | <2.8                 | 2.8  | -0.03     |
| Rheumatoid arthritis                          | 20.8                  | 29.3 | -0.20     | 22.9                 | 28.8 | -0.13     |
| Urinary tract infectious disease              | 8.5                   | 10.8 | -0.08     | 5.5                  | 10.8 | -0.19     |
| Viral hepatitis C                             | <3.8                  | <0.7 | 0.02      | <2.8                 | <0.7 | -0.04     |
| Visual system disorder                        | 17.7                  | 20.8 | -0.08     | 14.6                 | 20.9 | -0.16     |
| Medical history: Cardiovascular disease       |                       |      |           |                      |      |           |
| Cerebrovascular disease                       | 4.6                   | 4.1  | 0.03      | 5.5                  | 4.3  | 0.06      |
| Heart disease                                 | 6.9                   | 10.1 | -0.11     | 6.9                  | 10.0 | -0.11     |
| Heart failure                                 | <3.8                  | 1.5  | -0.07     | <2.8                 | 1.5  | -0.10     |
| Ischemic heart disease                        | <3.8                  | 3.4  | -0.02     | <2.8                 | 3.4  | -0.09     |
| Peripheral vascular disease                   | 8.5                   | 6.4  | 0.08      | 5.8                  | 6.4  | -0.02     |
| Venous thrombosis                             | <3.8                  | <0.7 | 0.04      | <2.8                 | <0.7 | -0.01     |
| Medical history: Neoplasms                    |                       |      |           |                      |      |           |
| Malignant neoplastic disease                  | <3.8                  | 4.7  | -0.13     | <2.8                 | 4.8  | -0.18     |
| Medication use                                |                       |      |           |                      |      |           |
| Agents acting on the renin-angiotensin system | 26.9                  | 31.2 | -0.09     | 21.0                 | 31.1 | -0.23     |
| Antibacterials for systemic use               | 27.7                  | 27.1 | 0.01      | 23.2                 | 27.6 | -0.10     |
| Antidepressants                               | 30.8                  | 28.9 | 0.04      | 33.8                 | 29.2 | 0.10      |
| Antiepileptics                                | 16.2                  | 14.0 | 0.06      | 14.3                 | 14.2 | 0.00      |
| Antiinflammatory and antirheumatic products   | 62.3                  | 64.4 | -0.04     | 55.1                 | 64.6 | -0.20     |
| Antineoplastic agents                         | 27.7                  | 17.6 | 0.24      | 18.1                 | 19.1 | -0.03     |
| Antipsoriatics                                | <3.8                  | 1.2  | -0.04     | <2.8                 | 1.1  | 0.08      |
| Antithrombotic agents                         | 20.8                  | 25.2 | -0.11     | 22.5                 | 25.0 | -0.06     |
| Beta blocking agents                          | 15.4                  | 15.0 | 0.01      | 15.3                 | 14.9 | 0.01      |
| Calcium channel blockers                      | 9.2                   | 9.8  | -0.02     | 10.1                 | 9.5  | 0.02      |
| Diuretics                                     | 30.0                  | 29.3 | 0.02      | 30.3                 | 29.3 | 0.02      |
| Drugs for acid related disorders              | 89.2                  | 83.2 | 0.18      | 82.0                 | 83.9 | -0.05     |

Risk of hydroxychloroquine with azithromycin

| Characteristic                                        | Before stratification |      |           | After stratification |      |           |
|-------------------------------------------------------|-----------------------|------|-----------|----------------------|------|-----------|
|                                                       | AZM                   | AMX  |           | AZM                  | AMX  |           |
|                                                       | %                     | %    | Std. diff | %                    | %    | Std. diff |
| Drugs for obstructive airway diseases                 | 48.5                  | 38.9 | 0.19      | 34.3                 | 41.2 | -0.14     |
| Drugs used in diabetes                                | 11.5                  | 14.7 | -0.09     | 11.8                 | 14.5 | -0.08     |
| Immunosuppressants                                    | 37.7                  | 29.4 | 0.18      | 26.9                 | 30.8 | -0.08     |
| Lipid modifying agents                                | 26.9                  | 27.4 | -0.01     | 27.1                 | 27.4 | -0.01     |
| Opioids                                               | 16.2                  | 22.2 | -0.15     | 13.2                 | 22.5 | -0.24     |
| Psycholeptics                                         | 43.8                  | 41.3 | 0.05      | 41.1                 | 41.6 | -0.01     |
| Psychostimulants, agents used for adhd and nootropics | 5.4                   | 2.5  | 0.15      | 3.6                  | 2.5  | 0.06      |

## S6.2.13. VA

| Characteristic                                   | Before stratification |      |           | After stratification |      |           |
|--------------------------------------------------|-----------------------|------|-----------|----------------------|------|-----------|
|                                                  | AZM                   | AMX  |           | AZM                  | AMX  |           |
|                                                  | %                     | %    | Std. diff | %                    | %    | Std. diff |
| Age group                                        |                       |      |           |                      |      |           |
| 20-24                                            | <0.1                  | 0.1  | 0.00      | <0.1                 | 0.1  | 0.00      |
| 25-29                                            | 0.4                   | 0.2  | 0.03      | 0.4                  | 0.3  | 0.03      |
| 30-34                                            | 1.0                   | 1.0  | 0.00      | 1.2                  | 1.1  | 0.02      |
| 35-39                                            | 1.3                   | 1.5  | -0.02     | 1.3                  | 1.4  | -0.01     |
| 40-44                                            | 2.5                   | 2.8  | -0.02     | 3.1                  | 2.7  | 0.02      |
| 45-49                                            | 4.9                   | 5.5  | -0.03     | 5.9                  | 5.4  | 0.02      |
| 50-54                                            | 8.8                   | 9.1  | -0.01     | 9.6                  | 9.0  | 0.02      |
| 55-59                                            | 13.4                  | 14.6 | -0.03     | 12.9                 | 14.3 | -0.04     |
| 60-64                                            | 17.6                  | 17.2 | 0.01      | 17.1                 | 18.0 | -0.02     |
| 65-69                                            | 18.2                  | 17.5 | 0.02      | 17.2                 | 17.0 | 0.00      |
| 70-74                                            | 13.7                  | 13.9 | -0.01     | 14.5                 | 14.2 | 0.01      |
| 75-79                                            | 8.9                   | 8.6  | 0.01      | 8.2                  | 8.6  | -0.01     |
| 80-84                                            | 5.7                   | 5.4  | 0.02      | 5.4                  | 5.2  | 0.00      |
| 85-89                                            | 2.9                   | 2.0  | 0.05      | 2.5                  | 2.0  | 0.03      |
| 90-94                                            | 0.6                   | 0.5  | 0.02      | 0.5                  | 0.6  | -0.01     |
| 95-99                                            | <0.1                  | <0.1 | 0.01      | <0.1                 | <0.1 | 0.00      |
| Gender: female                                   | 18.6                  | 16.7 | 0.05      | 18.7                 | 17.5 | 0.03      |
| Race                                             |                       |      |           |                      |      |           |
| race = Asian                                     | 0.4                   | 0.3  | 0.01      | 0.3                  | 0.3  | 0.01      |
| race = Black or African American                 | 16.5                  | 17.8 | -0.04     | 17.0                 | 17.7 | -0.02     |
| race = White                                     | 74.0                  | 71.1 | 0.06      | 73.2                 | 71.8 | 0.03      |
| race = Unknown                                   | 7.7                   | 8.9  | -0.04     | 8.0                  | 8.4  | -0.02     |
| race = Native Hawaiian or Other Pacific Islander | 0.6                   | 0.8  | -0.02     | 0.7                  | 0.8  | -0.01     |
| race = American Indian or Alaska Native          | 0.8                   | 1.1  | -0.02     | 0.8                  | 1.0  | -0.02     |
| Ethnicity                                        |                       |      |           |                      |      |           |
| ethnicity = Hispanic or Latino                   | 4.7                   | 5.2  | -0.02     | 3.9                  | 4.8  | -0.04     |
| ethnicity = Not Hispanic or Latino               | 91.1                  | 89.3 | 0.06      | 91.6                 | 89.9 | 0.06      |
| Medical history: General                         |                       |      |           |                      |      |           |
| Acute respiratory disease                        | 48.2                  | 29.9 | 0.38      | 40.3                 | 40.4 | 0.00      |
| Attention deficit hyperactivity disorder         | 0.4                   | 0.6  | -0.04     | 0.4                  | 0.6  | -0.03     |
| Chronic liver disease                            | 3.7                   | 4.6  | -0.04     | 3.7                  | 4.2  | -0.03     |
| Chronic obstructive lung disease                 | 33.7                  | 22.5 | 0.25      | 26.1                 | 27.6 | -0.03     |
| Crohn's disease                                  | 0.4                   | 0.4  | 0.00      | 0.4                  | 0.3  | 0.02      |
| Depressive disorder                              | 28.4                  | 27.9 | 0.01      | 29.5                 | 28.5 | 0.02      |
| Diabetes mellitus                                | 27.4                  | 29.5 | -0.05     | 28.0                 | 28.2 | 0.00      |
| Gastroesophageal reflux disease                  | 7.2                   | 8.0  | -0.03     | 7.4                  | 7.7  | -0.01     |
| Gastrointestinal hemorrhage                      | 3.2                   | 3.7  | -0.03     | 3.8                  | 3.2  | 0.03      |
| Human immunodeficiency virus infection           | 0.3                   | 0.4  | -0.02     | 0.3                  | 0.4  | -0.02     |
| Hyperlipidemia                                   | 48.8                  | 46.6 | 0.04      | 47.0                 | 47.0 | 0.00      |
| Hypertensive disorder                            | 64.7                  | 63.3 | 0.03      | 63.8                 | 63.3 | 0.01      |
| Lesion of liver                                  | 1.5                   | 1.9  | -0.03     | 1.7                  | 1.9  | -0.02     |
| Obesity                                          | 18.4                  | 18.4 | 0.00      | 17.8                 | 18.5 | -0.02     |
| Osteoarthritis                                   | 42.8                  | 43.8 | -0.02     | 42.6                 | 42.9 | 0.00      |
| Pneumonia                                        | 18.2                  | 7.9  | 0.31      | 12.9                 | 11.4 | 0.04      |
| Psoriasis                                        | 2.4                   | 2.5  | 0.00      | 2.5                  | 2.2  | 0.02      |
| Renal impairment                                 | 11.9                  | 11.8 | 0.00      | 11.4                 | 11.2 | 0.01      |
| Rheumatoid arthritis                             | 87.3                  | 86.0 | 0.04      | 86.0                 | 86.7 | -0.02     |
| Schizophrenia                                    | 0.7                   | 1.1  | -0.04     | 1.1                  | 1.1  | 0.00      |
| Ulcerative colitis                               | 0.4                   | 0.5  | -0.02     | 0.5                  | 0.4  | 0.01      |
| Urinary tract infectious disease                 | 5.9                   | 8.3  | -0.09     | 7.4                  | 7.2  | 0.01      |
| Visual system disorder                           | 65.7                  | 65.2 | 0.01      | 65.2                 | 64.9 | 0.01      |
| Medical history: Cardiovascular disease          |                       |      |           |                      |      |           |
| Atrial fibrillation                              | 7.4                   | 8.3  | -0.03     | 7.9                  | 8.1  | -0.01     |
| Cerebrovascular disease                          | 6.1                   | 5.6  | 0.02      | 6.1                  | 5.4  | 0.03      |
| Coronary arteriosclerosis                        | 19.5                  | 18.3 | 0.03      | 18.6                 | 18.0 | 0.02      |
| Heart disease                                    | 39.8                  | 38.2 | 0.03      | 38.7                 | 37.7 | 0.02      |

Risk of hydroxychloroquine with azithromycin

| Characteristic                                        | Before stratification |      |           | After stratification |      |           |
|-------------------------------------------------------|-----------------------|------|-----------|----------------------|------|-----------|
|                                                       | AZM                   | AMX  |           | AZM                  | AMX  |           |
|                                                       | %                     | %    | Std. diff | %                    | %    | Std. diff |
| Heart failure                                         | 11.8                  | 9.9  | 0.06      | 11.3                 | 10.2 | 0.04      |
| Ischemic heart disease                                | 15.7                  | 15.2 | 0.01      | 15.2                 | 15.1 | 0.00      |
| Peripheral vascular disease                           | 17.6                  | 18.4 | -0.02     | 18.1                 | 18.0 | 0.00      |
| Pulmonary embolism                                    | 1.5                   | 1.6  | -0.01     | 1.7                  | 1.5  | 0.02      |
| Venous thrombosis                                     | 2.3                   | 2.5  | -0.01     | 2.4                  | 2.2  | 0.01      |
| Medical history: Neoplasms                            |                       |      |           |                      |      |           |
| Hematologic neoplasm                                  | 1.8                   | 2.2  | -0.03     | 1.9                  | 2.2  | -0.02     |
| Malignant lymphoma                                    | 1.2                   | 1.3  | -0.01     | 1.2                  | 1.2  | 0.00      |
| Malignant neoplasm of anorectum                       | 0.2                   | 0.2  | 0.00      | 0.1                  | 0.1  | 0.00      |
| Malignant neoplastic disease                          | 16.3                  | 16.4 | 0.00      | 17.1                 | 16.0 | 0.03      |
| Malignant tumor of breast                             | 0.8                   | 0.4  | 0.06      | 0.8                  | 0.4  | 0.05      |
| Malignant tumor of colon                              | 0.6                   | 0.8  | -0.03     | 0.5                  | 0.7  | -0.03     |
| Malignant tumor of lung                               | 1.1                   | 1.0  | 0.00      | 1.0                  | 1.2  | -0.02     |
| Malignant tumor of urinary bladder                    | 1.2                   | 1.1  | 0.00      | 1.3                  | 1.1  | 0.02      |
| Primary malignant neoplasm of prostate                | 4.6                   | 5.0  | -0.02     | 5.0                  | 4.9  | 0.01      |
| Medication use                                        |                       |      |           |                      |      |           |
| Agents acting on the renin-angiotensin system         | 45.4                  | 45.3 | 0.00      | 44.8                 | 44.9 | 0.00      |
| Antiepileptics                                        | 29.8                  | 31.3 | -0.03     | 32.1                 | 30.4 | 0.04      |
| Antiinflammatory and antirheumatic products           | 49.5                  | 51.7 | -0.04     | 51.6                 | 51.5 | 0.00      |
| Antineoplastic agents                                 | 45.5                  | 39.0 | 0.13      | 41.5                 | 42.1 | -0.01     |
| Antipsoriatics                                        | 1.8                   | 1.6  | 0.02      | 2.2                  | 1.4  | 0.06      |
| Antithrombotic agents                                 | 45.3                  | 45.3 | 0.00      | 45.7                 | 43.9 | 0.04      |
| Beta blocking agents                                  | 40.4                  | 41.4 | -0.02     | 41.0                 | 40.2 | 0.02      |
| Calcium channel blockers                              | 27.4                  | 27.6 | -0.01     | 28.2                 | 27.0 | 0.03      |
| Diuretics                                             | 42.4                  | 41.4 | 0.02      | 42.3                 | 41.3 | 0.02      |
| Drugs for acid related disorders                      | 71.1                  | 70.4 | 0.01      | 71.1                 | 70.3 | 0.02      |
| Drugs for obstructive airway diseases                 | 57.5                  | 41.7 | 0.32      | 48.3                 | 49.0 | -0.01     |
| Drugs used in diabetes                                | 23.1                  | 25.1 | -0.05     | 24.4                 | 23.9 | 0.01      |
| Immunosuppressants                                    | 58.8                  | 52.8 | 0.12      | 54.7                 | 55.5 | -0.02     |
| Lipid modifying agents                                | 51.9                  | 49.9 | 0.04      | 50.4                 | 49.7 | 0.01      |
| Opioids                                               | 43.7                  | 46.6 | -0.06     | 45.3                 | 44.1 | 0.02      |
| Psycholeptics                                         | 35.3                  | 36.3 | -0.02     | 36.2                 | 35.7 | 0.01      |
| Psychostimulants, agents used for adhd and nootropics | 2.7                   | 2.9  | -0.02     | 2.9                  | 2.9  | 0.00      |

**S7. Patient counts, events, incident rates**

Patient counts, event counts, and incidence rates per 1,000 person-years are reported below for hydroxychloroquine vs sulfasalazine and hydroxychloroquine+azithromycin vs hydroxychloroquine+amoxicillin during 30-day and on-treatment follow-up periods for outcomes not reported in the manuscript. Note that the IR does not account for stratification.

| Comparison | Outcome               | Database      | 30-day follow-up |         |        |     |        |       | On-treatment follow-up |         |        |       |       |       |
|------------|-----------------------|---------------|------------------|---------|--------|-----|--------|-------|------------------------|---------|--------|-------|-------|-------|
|            |                       |               | Patients         |         | Events |     | IR     |       | Patients               |         | Events |       | IR    |       |
|            |                       |               | T                | C       | T      | C   | T      | C     | T                      | C       | T      | C     | T     | C     |
| HCQ vs SSZ | All-cause mortality   | Clinformatics | 51,280           | 17,389  | 20     | 10  | 4.81   | 7.09  | 51,280                 | 17,389  | 527    | 66    | 9.88  | 5.29  |
|            |                       | CPRD          | 9,127            | 11,398  | 6      | 5   | 8.03   | 5.35  | 9,127                  | 11,398  | 253    | 386   | 14.02 | 14.56 |
|            |                       | IMRD          | 8,851            | 8,460   | <5     | 6   | <6.91  | 8.66  | 8,851                  | 8,460   | 214    | 241   | 12.32 | 12.72 |
|            |                       | VA            | 32,028           | 14,349  | 45     | 17  | 17.13  | 14.45 | 32,028                 | 14,349  | 1,356  | 327   | 24.51 | 18.65 |
|            |                       | Meta-analysis | 101,286          | 51,596  | <76    | 38  | <9.20  | 9.02  | NA                     | NA      | NA     | NA    | NA    | NA    |
|            | Myocardial infarction | CCAE          | 66,630           | 22,374  | 29     | 11  | 5.36   | 6.05  | 66,630                 | 22,374  | 240    | 48    | 3.64  | 3.28  |
|            |                       | Clinformatics | 51,244           | 17,380  | 51     | 20  | 12.27  | 14.19 | 51,244                 | 17,380  | 517    | 121   | 9.79  | 9.81  |
|            |                       | MDCD          | 8,079            | 2,196   | 13     | 5   | 19.75  | 27.98 | 8,079                  | 2,196   | 83     | 14    | 14.32 | 11.39 |
|            |                       | MDCR          | 15,827           | 5,190   | 26     | 10  | 20.17  | 23.68 | 15,827                 | 5,190   | 287    | 70    | 15.93 | 17.55 |
|            |                       | OpenClaims    | 620,751          | 183,482 | 369    | 89  | 7.24   | 5.91  | 620,751                | 183,482 | 5,396  | 956   | 6.25  | 5.57  |
|            |                       | OptumEHR      | 78,424           | 21,885  | 59     | 12  | 9.29   | 6.77  | NA                     | NA      | NA     | NA    | NA    | NA    |
|            |                       | VA            | 32,009           | 14,342  | 30     | 9   | 11.43  | 7.65  | 32,009                 | 14,342  | 395    | 137   | 7.22  | 7.89  |
|            |                       | Meta-analysis | 872,964          | 266,849 | 577    | 156 | 8.08   | 7.14  | 794,540                | 244,964 | 6,918  | 1,346 | 6.52  | 6.08  |
|            |                       | CCAE          | 66,533           | 22,357  | 97     | 36  | 17.96  | 19.83 | 66,533                 | 22,357  | 839    | 197   | 12.86 | 13.6  |
|            | Cardiovascular events | Clinformatics | 51,095           | 17,340  | 215    | 76  | 51.96  | 54.11 | 51,095                 | 17,340  | 2,232  | 490   | 43.8  | 40.92 |
|            |                       | MDCD          | 8,041            | 2,186   | 35     | 11  | 53.5   | 61.95 | 8,041                  | 2,186   | 388    | 78    | 70.54 | 66.08 |
|            |                       | MDCR          | 15,759           | 5,167   | 117    | 39  | 91.39  | 93.05 | 15,759                 | 5,167   | 1,295  | 310   | 76.12 | 82.67 |
|            |                       | OpenClaims    | 619,493          | 183,209 | 1,636  | 470 | 32.2   | 31.28 | 619,493                | 183,209 | 22,657 | 4,394 | 26.94 | 26.16 |
|            |                       | OptumEHR      | 77,825           | 21,752  | 294    | 70  | 46.7   | 39.79 | NA                     | NA      | NA     | NA    | NA    | NA    |
|            |                       | VA            | 31,913           | 14,300  | 120    | 46  | 45.92  | 39.28 | 31,913                 | 14,300  | 1,577  | 546   | 29.84 | 32.57 |
|            |                       | Meta-analysis | 870,659          | 266,311 | 2,514  | 748 | 35.31  | 34.35 | 792,834                | 244,559 | 28,988 | 6,015 | 28.07 | 27.83 |
|            | Cardiac arrhythmia    | AmbEMR        | 56,743           | 15,208  | 147    | 43  | 31.61  | 34.5  | 56,743                 | 15,208  | 467    | 163   | 25.54 | 29.19 |
|            |                       | CCAE          | 66,430           | 22,337  | 153    | 58  | 28.38  | 32    | 66,430                 | 22,337  | 1,301  | 348   | 20.3  | 24.42 |
|            |                       | Clinformatics | 51,069           | 17,320  | 159    | 61  | 38.43  | 43.46 | 51,069                 | 17,320  | 1,557  | 461   | 30.64 | 39.13 |
|            |                       | CPRD          | 9,120            | 11,390  | 7      | 14  | 9.38   | 15    | 9,120                  | 11,390  | 113    | 180   | 6.37  | 6.95  |
|            |                       | DAGermany     | 3,883            | 5,040   | <5     | 5   | <15.70 | 12.09 | 3,883                  | 5,040   | 22     | 38    | 8.68  | 10.82 |
|            |                       | IMRD          | 8,847            | 8,452   | 8      | 12  | 11.06  | 17.35 | 8,847                  | 8,452   | 101    | 123   | 5.9   | 6.64  |
|            |                       | MDCD          | 8,051            | 2,191   | 37     | 10  | 56.48  | 56.15 | 8,051                  | 2,191   | 232    | 40    | 41.47 | 33.06 |
|            |                       | MDCR          | 15,763           | 5,165   | 73     | 24  | 56.93  | 57.2  | 15,763                 | 5,165   | 726    | 183   | 42.35 | 48.33 |
|            |                       | OpenClaims    | 619,285          | 183,147 | 1,505  | 490 | 29.63  | 32.62 | 619,285                | 183,147 | 19,445 | 4,134 | 23.37 | 24.86 |
|            |                       | OptumEHR      | 77,008           | 21,581  | 472    | 115 | 75.89  | 65.97 | NA                     | NA      | NA     | NA    | NA    | NA    |
|            |                       | VA            | 31,766           | 14,275  | 107    | 45  | 41.12  | 38.48 | 31,766                 | 14,275  | 1,391  | 508   | 26.84 | 30.95 |
|            |                       | Meta-analysis | 947,965          | 306,106 | <2,673 | 877 | <34.48 | 35.03 | NA                     | NA      | NA     | NA    | NA    | NA    |

Table S7, continued.

| Comparison    | Outcome                   | Database      | 30-day follow-up |         |        |        |         |         | On-treatment follow-up |         |        |       |       |       |
|---------------|---------------------------|---------------|------------------|---------|--------|--------|---------|---------|------------------------|---------|--------|-------|-------|-------|
|               |                           |               | Patients         |         | Events |        | IR      |         | Patients               |         | Events |       | IR    |       |
|               |                           |               | T                | C       | T      | C      | T       | C       | T                      | C       | T      | C     | T     | C     |
| HCQ vs SSZ    | Bradycardia               | AmbEMR        | 57,594           | 15,350  | 17     | <5     | 3.6     | <3.97   | 57,594                 | 15,350  | 60     | 15    | 3.2   | 2.63  |
|               |                           | CCAIE         | 66,640           | 22,373  | 5      | <5     | 0.92    | <2.75   | 66,640                 | 22,373  | 69     | 13    | 1.04  | 0.89  |
|               |                           | Clinformatics | 51,259           | 17,386  | 23     | <5     | 5.53    | <3.54   | 51,259                 | 17,386  | 256    | 55    | 4.83  | 4.43  |
|               |                           | CPRD          | NA               | NA      | NA     | NA     | NA      | NA      | 9,127                  | 11,398  | <5     | <5    | <0.28 | <0.19 |
|               |                           | IMRD          | NA               | NA      | NA     | NA     | NA      | NA      | 8,852                  | 8,460   | <5     | <5    | <0.29 | <0.26 |
|               |                           | MDCD          | 8,085            | 2,197   | 6      | <5     | 9.1     | <27.96  | 8,085                  | 2,197   | 30     | <5    | 5.14  | <4.02 |
|               |                           | MDCR          | NA               | NA      | NA     | NA     | NA      | NA      | 15,830                 | 5,190   | 106    | 25    | 5.84  | 6.21  |
|               |                           | OpenClaims    | 620,919          | 183,510 | 155    | 56     | 3.04    | 3.72    | 620,919                | 183,510 | 2,791  | 507   | 3.22  | 2.95  |
|               |                           | OptumEHR      | 78,425           | 21,911  | 62     | 16     | 9.76    | 9.02    | NA                     | NA      | NA     | NA    | NA    | NA    |
|               |                           | VA            | 32,018           | 14,345  | 9      | <5     | 3.43    | <4.25   | 32,018                 | 14,345  | 231    | 62    | 4.21  | 3.56  |
|               | Meta-analysis             | 914,940       | 277,072          | 277     | <97    | 3.7    | <4.28   | 870,324 | 280,209                | <3,553  | <692   | <3.18 | <2.53 |       |
|               | Transient ischemic attack | CCAIE         | 66,617           | 22,372  | 23     | 6      | 4.25    | 3.3     | 66,617                 | 22,372  | 187    | 35    | 2.84  | 2.39  |
|               |                           | Clinformatics | 51,235           | 17,377  | 38     | 9      | 9.14    | 6.38    | 51,235                 | 17,377  | 375    | 75    | 7.09  | 6.06  |
|               |                           | MDCD          | 8,078            | 2,198   | 7      | <5     | 10.63   | <27.96  | 8,078                  | 2,198   | 58     | 10    | 9.97  | 8.08  |
|               |                           | MDCR          | 15,821           | 5,187   | 17     | 7      | 13.19   | 16.59   | 15,821                 | 5,187   | 202    | 47    | 11.18 | 11.74 |
|               |                           | OpenClaims    | 620,812          | 183,511 | 261    | 56     | 5.12    | 3.72    | 620,812                | 183,511 | 3,381  | 615   | 3.91  | 3.58  |
|               |                           | OptumEHR      | 78,520           | 21,921  | 26     | 7      | 4.09    | 3.94    | NA                     | NA      | NA     | NA    | NA    | NA    |
|               |                           | VA            | 32,010           | 14,346  | 10     | 5      | 3.81    | 4.25    | 32,010                 | 14,346  | 153    | 49    | 2.78  | 2.81  |
|               | Meta-analysis             | 873,093       | 266,912          | 382     | <95    | 5.34   | <4.35   | 794,573 | 244,991                | 4,356   | 831    | 4.1   | 3.75  |       |
|               | Stroke                    | CCAIE         | 66,619           | 22,374  | 26     | 8      | 4.8     | 4.4     | 66,619                 | 22,374  | 221    | 41    | 3.35  | 2.81  |
|               |                           | Clinformatics | 51,239           | 17,376  | 41     | 12     | 9.86    | 8.51    | 51,239                 | 17,376  | 562    | 106   | 10.66 | 8.56  |
|               |                           | MDCD          | 8,073            | 2,196   | 13     | <5     | 19.76   | <27.98  | 8,073                  | 2,196   | 103    | 15    | 17.82 | 12.13 |
|               |                           | MDCR          | 15,825           | 5,186   | 29     | 9      | 22.5    | 21.34   | 15,825                 | 5,186   | 300    | 66    | 16.64 | 16.53 |
|               |                           | OpenClaims    | 620,748          | 183,482 | 383    | 98     | 7.52    | 6.51    | 620,748                | 183,482 | 5,413  | 1,122 | 6.27  | 6.54  |
|               |                           | OptumEHR      | 78,442           | 21,897  | 52     | 10     | 8.18    | 5.64    | NA                     | NA      | NA     | NA    | NA    | NA    |
|               |                           | VA            | 32,008           | 14,341  | 19     | 8      | 7.24    | 6.8     | 32,008                 | 14,341  | 241    | 70    | 4.38  | 4.01  |
|               |                           | Meta-analysis | 872,954          | 266,852 | 563    | <150   | 7.88    | <6.87   | NA                     | NA      | NA     | NA    | NA    | NA    |
|               | Venous thromboembolism    | AmbEMR        | 57,262           | 15,281  | 52     | 17     | 11.07   | 13.56   | 57,262                 | 15,281  | 201    | 68    | 10.81 | 12.05 |
|               |                           | CCAIE         | 66,528           | 22,358  | 70     | 23     | 12.96   | 12.67   | 66,528                 | 22,358  | 650    | 152   | 9.96  | 10.48 |
|               |                           | Clinformatics | 51,153           | 17,355  | 104    | 31     | 25.08   | 22.03   | 51,153                 | 17,355  | 949    | 207   | 18.23 | 16.87 |
|               |                           | CPRD          | 9,118            | 11,390  | <5     | 11     | <6.70   | 11.79   | 9,118                  | 11,390  | 130    | 177   | 7.35  | 6.79  |
|               |                           | DAGermany     | 3,881            | 5,033   | <5     | 6      | <15.70  | 14.53   | 3,881                  | 5,033   | 34     | 47    | 13.56 | 13.43 |
|               |                           | IMRD          | 8,841            | 8,455   | 5      | 10     | 6.92    | 14.45   | 8,841                  | 8,455   | 116    | 123   | 6.79  | 6.59  |
|               |                           | MDCD          | 8,059            | 2,196   | 24     | <5     | 36.57   | <27.98  | 8,059                  | 2,196   | 157    | 19    | 27.6  | 15.47 |
|               |                           | MDCR          | 15,780           | 5,176   | 41     | 8      | 31.9    | 18.99   | 15,780                 | 5,176   | 442    | 89    | 24.86 | 22.63 |
|               |                           | OpenClaims    | 620,093          | 183,330 | 788    | 237    | 15.48   | 15.75   | 620,093                | 183,330 | 10,006 | 2,001 | 11.74 | 11.77 |
| OptumEHR      |                           | 78,092        | 21,804           | 241     | 52     | 38.15  | 29.47   | NA      | NA                     | NA      | NA     | NA    | NA    |       |
| VA            |                           | 31,962        | 14,328           | 42      | 22     | 16.03  | 18.73   | 31,962  | 14,328                 | 583     | 208    | 10.76 | 12.09 |       |
| Meta-analysis | 950,769                   | 306,706       | <1,377           | <422    | <17.70 | <16.81 | 872,677 | 284,902 | 13,268                 | 3,091   | 12.03  | 11.32 |       |       |



Table S7, continued.

| Comparison | Outcome                   | Database      | 30-day follow-up |         |        |       |       |         | On-treatment follow-up |         |        |       |       |       |
|------------|---------------------------|---------------|------------------|---------|--------|-------|-------|---------|------------------------|---------|--------|-------|-------|-------|
|            |                           |               | Patients         |         | Events |       | IR    |         | Patients               |         | Events |       | IR    |       |
|            |                           |               | T                | C       | T      | C     | T     | C       | T                      | C       | T      | C     | T     | C     |
| HCQ vs SSZ | Gastrointestinal bleeding | CCAIE         | 66,621           | 22,357  | 40     | 12    | 7.39  | 6.61    | 66,621                 | 22,357  | 332    | 54    | 5.05  | 3.69  |
|            |                           | Clinformatics | 51,218           | 17,345  | 68     | 13    | 16.37 | 9.24    | 51,218                 | 17,345  | 658    | 118   | 12.51 | 9.53  |
|            |                           | MDCD          | 8,071            | 2,191   | 16     | <5    | 24.33 | <28.05  | 8,071                  | 2,191   | 109    | 13    | 18.9  | 10.51 |
|            |                           | MDCR          | 15,813           | 5,177   | 31     | 7     | 24.06 | 16.62   | 15,813                 | 5,177   | 350    | 62    | 19.49 | 15.49 |
|            |                           | OpenClaims    | 620,631          | 183,371 | 438    | 126   | 8.6   | 8.37    | 620,631                | 183,371 | 6,086  | 1,108 | 7.06  | 6.46  |
|            |                           | OptumEHR      | 78,411           | 21,890  | 78     | 18    | 12.28 | 10.15   | NA                     | NA      | NA     | NA    | NA    | NA    |
|            |                           | VA            | 31,993           | 14,334  | 26     | 16    | 9.91  | 13.62   | 31,993                 | 14,334  | 390    | 143   | 7.12  | 8.23  |
|            | Meta-analysis             | 872,758       | 266,665          | 697     | <197   | 9.76  | <9.03 | NA      | NA                     | NA      | NA     | NA    | NA    |       |
|            | Acute renal failure       | CCAIE         | 66,584           | 22,362  | 72     | 27    | 13.32 | 14.87   | 66,584                 | 22,362  | 526    | 96    | 8.01  | 6.59  |
|            |                           | Clinformatics | 51,166           | 17,353  | 163    | 54    | 39.32 | 38.39   | 51,166                 | 17,353  | 1,377  | 298   | 26.47 | 24.32 |
|            |                           | MDCD          | 8,051            | 2,189   | 41     | 13    | 62.61 | 73.1    | 8,051                  | 2,189   | 256    | 44    | 45.23 | 36.48 |
|            |                           | MDCR          | 15,797           | 5,181   | 60     | 17    | 46.67 | 40.37   | 15,797                 | 5,181   | 608    | 133   | 34.22 | 33.69 |
|            |                           | OpenClaims    | 620,101          | 183,354 | 1,061  | 308   | 20.85 | 20.47   | 620,101                | 183,354 | 13,812 | 2,404 | 16.18 | 14.1  |
|            |                           | OptumEHR      | 78,010           | 21,797  | 186    | 42    | 29.45 | 23.81   | NA                     | NA      | NA     | NA    | NA    | NA    |
|            |                           | VA            | 31,947           | 14,317  | 102    | 35    | 38.98 | 29.84   | 31,947                 | 14,317  | 1,214  | 307   | 22.63 | 17.85 |
|            | Meta-analysis             | 871,656       | 266,553          | 1,685   | 496    | 23.63 | 22.75 | 793,646 | 244,756                | 17,793  | 3,282  | 16.97 | 14.94 |       |
|            | End stage renal disease   | AmbEMR        | NA               | NA      | NA     | NA    | NA    | NA      | 57,647                 | 15,355  | 12     | <5    | 0.64  | <0.88 |
|            |                           | CCAIE         | 66,641           | 22,378  | <5     | <5    | <0.92 | <2.75   | 66,641                 | 22,378  | 48     | 8     | 0.73  | 0.55  |
|            |                           | Clinformatics | 51,271           | 17,389  | 7      | <5    | 1.68  | <3.54   | 51,271                 | 17,389  | 118    | 19    | 2.22  | 1.52  |
|            |                           | MDCD          | NA               | NA      | NA     | NA    | NA    | NA      | 8,087                  | 2,198   | 15     | <5    | 2.56  | <4.01 |
|            |                           | MDCR          | 15,838           | 5,191   | <5     | <5    | <3.87 | <11.83  | 15,838                 | 5,191   | 56     | 7     | 3.07  | 1.73  |
|            |                           | OpenClaims    | 621,009          | 183,543 | 70     | 8     | 1.37  | 0.53    | 621,009                | 183,543 | 1,298  | 174   | 1.49  | 1.01  |
|            |                           | OptumEHR      | 78,526           | 21,924  | 27     | <5    | 4.24  | <2.82   | NA                     | NA      | NA     | NA    | NA    | NA    |
|            |                           | VA            | 32,020           | 14,348  | 5      | <5    | 1.9   | <4.25   | 32,020                 | 14,348  | 86     | 27    | 1.56  | 1.54  |
|            | Meta-analysis             | 865,305       | 264,773          | <119    | <33    | <1.68 | <1.52 | 852,513 | 260,402                | 1,633   | <245   | 1.5   | <1.07 |       |
|            | Hepatic failure           | CCAIE         | 66,638           | 22,378  | 6      | <5    | 1.11  | <2.75   | 66,638                 | 22,378  | 50     | 11    | 0.76  | 0.75  |
|            |                           | Clinformatics | 51,267           | 17,387  | 13     | <5    | 3.13  | <3.54   | 51,267                 | 17,387  | 102    | 26    | 1.92  | 2.09  |
|            |                           | DAGermany     | NA               | NA      | NA     | NA    | NA    | NA      | 3,887                  | 5,047   | <5     | <5    | <1.95 | <1.40 |
|            |                           | MDCD          | 8,085            | 2,198   | <5     | <5    | <7.58 | <27.95  | 8,085                  | 2,198   | 25     | 6     | 4.26  | 4.82  |
|            |                           | MDCR          | NA               | NA      | NA     | NA    | NA    | NA      | 15,841                 | 5,189   | 32     | 5     | 1.75  | 1.23  |
|            |                           | OpenClaims    | 621,042          | 183,551 | 42     | 23    | 0.82  | 1.53    | 621,042                | 183,551 | 729    | 151   | 0.84  | 0.87  |
|            |                           | OptumEHR      | 78,529           | 21,916  | 32     | 9     | 5.03  | 5.07    | NA                     | NA      | NA     | NA    | NA    | NA    |
|            |                           | VA            | 32,025           | 14,348  | 5      | <5    | 1.9   | <4.25   | 32,025                 | 14,348  | 61     | 14    | 1.1   | 0.8   |
|            | Meta-analysis             | 857,586       | 261,778          | <103    | <52    | <1.47 | <2.43 | 798,785 | 250,098                | <1,004  | <218   | <0.94 | <0.96 |       |
|            | Acute pancreatitis        | CCAIE         | 66,637           | 22,374  | 22     | 7     | 4.06  | 3.85    | 66,637                 | 22,374  | 143    | 34    | 2.17  | 2.32  |
|            |                           | Clinformatics | 51,259           | 17,384  | 21     | 9     | 5.05  | 6.38    | 51,259                 | 17,384  | 171    | 50    | 3.22  | 4.02  |
|            |                           | MDCD          | 8,077            | 2,196   | 10     | <5    | 15.19 | <27.97  | 8,077                  | 2,196   | 55     | 8     | 9.47  | 6.45  |
|            |                           | MDCR          | 15,833           | 5,188   | 6      | <5    | 4.65  | <11.84  | 15,833                 | 5,188   | 62     | 15    | 3.4   | 3.7   |
|            |                           | OpenClaims    | 620,956          | 183,525 | 155    | 50    | 3.04  | 3.32    | 620,956                | 183,525 | 1,881  | 390   | 2.17  | 2.26  |
|            |                           | OptumEHR      | 78,522           | 21,921  | 21     | 5     | 3.3   | 2.82    | NA                     | NA      | NA     | NA    | NA    | NA    |
|            |                           | VA            | 32,023           | 14,347  | 12     | <5    | 4.57  | <4.25   | 32,023                 | 14,347  | 106    | 46    | 1.92  | 2.63  |
|            | Meta-analysis             | 873,307       | 266,935          | 247     | <86    | 3.45  | <3.94 | 794,785 | 245,014                | 2,418   | 543    | 2.27  | 2.44  |       |

Table S7, continued.

| Comparison    | Outcome               | Database      | 30-day follow-up |         |        |        |        |         | On-treatment follow-up |         |        |       |       |       |
|---------------|-----------------------|---------------|------------------|---------|--------|--------|--------|---------|------------------------|---------|--------|-------|-------|-------|
|               |                       |               | Patients         |         | Events |        | IR     |         | Patients               |         | Events |       | IR    |       |
|               |                       |               | T                | C       | T      | C      | T      | C       | T                      | C       | T      | C     | T     | C     |
| AZM vs AMX    | All-cause mortality   | Clinformatics | 23,597           | 24,521  | 17     | 17     | 8.88   | 8.55    | 23,597                 | 24,521  | 268    | 276   | 15.56 | 18.85 |
|               |                       | VA            | 6,234            | 8,005   | 91     | 52     | 179.23 | 79.42   | 6,234                  | 8,005   | 550    | 518   | 51.16 | 45.97 |
|               |                       | Meta-analysis | 29,831           | 32,526  | 108    | 69     | 44.58  | 26.12   | 29,831                 | 32,526  | 818    | 794   | 29.24 | 30.64 |
|               |                       | CCAIE         | 32,610           | 32,507  | 13     | 11     | 4.92   | 4.17    | 32,610                 | 32,507  | 117    | 94    | 4.33  | 4.33  |
|               |                       | Clinformatics | 23,565           | 24,484  | 30     | 29     | 15.7   | 14.62   | 23,565                 | 24,484  | 179    | 147   | 10.6  | 10.19 |
|               |                       | MDCD          | 3,803            | 3,808   | <5     | 6      | <16.21 | 19.4    | 3,803                  | 3,808   | 29     | 27    | 11.46 | 13.46 |
|               |                       | MDCR          | 8,119            | 9,254   | 16     | 9      | 24.33  | 11.96   | 8,119                  | 9,254   | 166    | 140   | 20.41 | 17.34 |
|               |                       | OpenClaims    | 216,028          | 232,938 | 182    | 173    | 10.26  | 9.05    | 216,028                | 232,938 | 2,065  | 1,732 | 8.11  | 7.94  |
|               |                       | OptumEHR      | 18,477           | 16,424  | 26     | 20     | 17.35  | 15.01   | NA                     | NA      | NA     | NA    | NA    | NA    |
|               |                       | VA            | 6,203            | 7,978   | 33     | 19     | 65.53  | 29.15   | 6,203                  | 7,978   | 154    | 127   | 14.79 | 11.59 |
|               | Meta-analysis         | 308,805       | 327,393          | <305    | 267    | <12.08 | 9.97   | 290,328 | 310,969                | 2,710   | 2,267  | 8.48  | 8.24  |       |
|               | Cardiovascular events | CCAIE         | 32,540           | 32,453  | 68     | 57     | 25.8   | 21.67   | 32,540                 | 32,453  | 467    | 351   | 17.73 | 16.54 |
|               |                       | Clinformatics | 23,434           | 24,361  | 147    | 137    | 77.54  | 69.59   | 23,434                 | 24,361  | 723    | 669   | 45.56 | 49.38 |
|               |                       | MDCD          | 3,759            | 3,781   | 31     | 30     | 102.07 | 97.98   | 3,759                  | 3,781   | 157    | 122   | 69.38 | 67.74 |
|               |                       | MDCR          | 8,030            | 9,188   | 93     | 59     | 143.76 | 79.2    | 8,030                  | 9,188   | 657    | 573   | 92.6  | 78.6  |
|               |                       | OpenClaims    | 215,278          | 232,274 | 901    | 784    | 51.08  | 41.18   | 215,278                | 232,274 | 7,835  | 6,884 | 32.54 | 33.34 |
|               |                       | OptumEHR      | 17,963           | 16,221  | 123    | 80     | 84.71  | 60.92   | NA                     | NA      | NA     | NA    | NA    | NA    |
|               |                       | VA            | 6,047            | 7,866   | 183    | 87     | 378.81 | 136.03  | 6,047                  | 7,866   | 544    | 445   | 58.44 | 44.08 |
|               | Meta-analysis         | NA            | NA               | NA      | NA     | NA     | NA     | 289,088 | 309,923                | 10,383  | 9,044  | 34.42 | 34.73 |       |
|               | Cardiac arrhythmia    | AmbEMR        | 13,076           | 11,977  | 27     | 25     | 25.18  | 25.46   | 13,076                 | 11,977  | 116    | 90    | 20.7  | 18.79 |
|               |                       | CCAIE         | 32,510           | 32,423  | 113    | 67     | 42.94  | 25.5    | 32,510                 | 32,423  | 711    | 486   | 28.53 | 23.76 |
|               |                       | Clinformatics | 23,475           | 24,403  | 90     | 76     | 47.34  | 38.49   | 23,475                 | 24,403  | 556    | 482   | 35.52 | 36.2  |
|               |                       | MDCD          | 3,781            | 3,787   | 14     | 18     | 45.72  | 58.59   | 3,781                  | 3,787   | 88     | 77    | 37.42 | 41.8  |
|               |                       | MDCR          | 8,084            | 9,210   | 45     | 48     | 68.86  | 64.24   | 8,084                  | 9,210   | 354    | 361   | 47.87 | 49.98 |
|               |                       | OpenClaims    | 215,473          | 232,391 | 568    | 589    | 32.15  | 30.91   | 215,473                | 232,391 | 5,724  | 4,989 | 23.82 | 24.22 |
|               |                       | OptumEHR      | 18,022           | 16,138  | 153    | 111    | 105.13 | 85.09   | NA                     | NA      | NA     | NA    | NA    | NA    |
|               |                       | VA            | 6,168            | 7,935   | 58     | 47     | 116.1  | 72.64   | 6,168                  | 7,935   | 297    | 289   | 31.93 | 29.25 |
|               | Bradycardia           | AmbEMR        | NA               | NA      | NA     | NA     | NA     | NA      | 13,193                 | 12,080  | 14     | 14    | 2.36  | 2.81  |
|               |                       | CCAIE         | 32,619           | 32,516  | <5     | <5     | <1.89  | <1.90   | 32,619                 | 32,516  | 43     | 50    | 1.58  | 2.29  |
|               |                       | Clinformatics | 23,580           | 24,509  | 10     | 17     | 5.23   | 8.56    | 23,580                 | 24,509  | 108    | 96    | 6.34  | 6.61  |
| MDCD          |                       | 3,807         | 3,810            | <5      | <5     | <16.19 | <16.15 | 3,807   | 3,810                  | 19      | 11     | 7.41  | 5.42  |       |
| MDCR          |                       | 8,124         | 9,268            | 5       | <5     | 7.59   | <6.63  | 8,124   | 9,268                  | 70      | 86     | 8.51  | 10.63 |       |
| OpenClaims    |                       | 216,124       | 233,035          | 72      | 78     | 4.06   | 4.08   | 216,124 | 233,035                | 1,115   | 1,069  | 4.35  | 4.88  |       |
| OptumEHR      |                       | 18,546        | 16,432           | 15      | 23     | 9.97   | 17.26  | NA      | NA                     | NA      | NA     | NA    | NA    |       |
| VA            |                       | 6,227         | 8,000            | <5      | <5     | <9.86  | <7.64  | 6,227   | 8,000                  | 64      | 60     | 6.1   | 5.42  |       |
| Meta-analysis |                       | 309,027       | 327,570          | <117    | <138   | <4.63  | <5.15  | 303,674 | 323,218                | 1,433   | 1,386  | 4.37  | 4.93  |       |

Table S7, continued.

| Comparison | Outcome                   | Database      | 30-day follow-up |         |        |       |        |         | On-treatment follow-up |         |        |       |       |       |
|------------|---------------------------|---------------|------------------|---------|--------|-------|--------|---------|------------------------|---------|--------|-------|-------|-------|
|            |                           |               | Patients         |         | Events |       | IR     |         | Patients               |         | Events |       | IR    |       |
|            |                           |               | T                | C       | T      | C     | T      | C       | T                      | C       | T      | C     | T     | C     |
| AZM vs AMX | Transient ischemic attack | CCAIE         | 32,609           | 32,505  | 5      | 11    | 1.89   | 4.17    | 32,609                 | 32,505  | 111    | 77    | 4.11  | 3.55  |
|            |                           | Clinformatics | 23,577           | 24,501  | 20     | 24    | 10.46  | 12.09   | 23,577                 | 24,501  | 122    | 120   | 7.18  | 8.32  |
|            |                           | MDCD          | 3,802            | 3,808   | 7      | <5    | 22.72  | <16.16  | 3,802                  | 3,808   | 27     | 15    | 10.62 | 7.51  |
|            |                           | MDCR          | 8,121            | 9,259   | 9      | 10    | 13.67  | 13.28   | 8,121                  | 9,259   | 118    | 102   | 14.53 | 12.6  |
|            |                           | OpenClaims    | 216,102          | 232,985 | 96     | 102   | 5.41   | 5.33    | 216,102                | 232,985 | 1,306  | 1,102 | 5.11  | 5.04  |
|            |                           | OptumEHR      | 18,563           | 16,456  | 9      | 5     | 5.98   | 3.74    | NA                     | NA      | NA     | NA    | NA    | NA    |
|            |                           | VA            | 6,231            | 8,000   | 12     | 5     | 23.67  | 7.64    | 6,231                  | 8,000   | 54     | 41    | 5.11  | 3.69  |
|            | Meta-analysis             | 309,005       | 327,514          | 158     | <162   | 6.25  | <6.05  | 290,442 | 311,058                | 1,738   | 1,457  | 5.42  | 5.28  |       |
|            | Stroke                    | CCAIE         | 32,609           | 32,508  | 12     | 11    | 4.54   | 4.17    | 32,609                 | 32,508  | 131    | 94    | 4.85  | 4.33  |
|            |                           | Clinformatics | 23,572           | 24,490  | 33     | 34    | 17.26  | 17.14   | 23,572                 | 24,490  | 174    | 157   | 10.28 | 10.87 |
|            |                           | MDCD          | 3,803            | 3,808   | 7      | 7     | 22.71  | 22.63   | 3,803                  | 3,808   | 36     | 29    | 14.16 | 14.55 |
|            |                           | MDCR          | 8,118            | 9,257   | 17     | 13    | 25.85  | 17.27   | 8,118                  | 9,257   | 156    | 173   | 19.33 | 21.57 |
|            |                           | OpenClaims    | 216,089          | 232,948 | 155    | 159   | 8.74   | 8.32    | 216,089                | 232,948 | 2,063  | 1,858 | 8.12  | 8.55  |
|            |                           | OptumEHR      | 18,538           | 16,433  | 25     | 9     | 16.63  | 6.75    | NA                     | NA      | NA     | NA    | NA    | NA    |
|            |                           | VA            | 6,215            | 7,995   | 10     | 15    | 19.77  | 22.96   | 6,215                  | 7,995   | 76     | 83    | 7.23  | 7.5   |
|            | Meta-analysis             | 308,944       | 327,439          | 259     | 248    | 10.25 | 9.26   | 290,406 | 311,006                | 2,636   | 2,394  | 8.26  | 8.72  |       |
|            | Venous thromboembolism    | AmbEMR        | 13,133           | 12,024  | 11     | 19    | 10.21  | 19.27   | 13,133                 | 12,024  | 51     | 57    | 8.71  | 11.72 |
|            |                           | CCAIE         | 32,559           | 32,467  | 40     | 40    | 15.16  | 15.2    | 32,559                 | 32,467  | 339    | 227   | 12.8  | 10.59 |
|            |                           | Clinformatics | 23,540           | 24,459  | 54     | 63    | 28.3   | 31.82   | 23,540                 | 24,459  | 330    | 303   | 20.08 | 21.49 |
|            |                           | MDCD          | 3,793            | 3,797   | 8      | 18    | 26.03  | 58.49   | 3,793                  | 3,797   | 81     | 61    | 33.31 | 31.49 |
|            |                           | MDCR          | 8,104            | 9,239   | 23     | 24    | 35.04  | 31.96   | 8,104                  | 9,239   | 228    | 204   | 28.93 | 26.03 |
|            |                           | OpenClaims    | 215,805          | 232,676 | 320    | 357   | 18.07  | 18.7    | 215,805                | 232,676 | 3,662  | 3,137 | 14.74 | 14.73 |
|            |                           | OptumEHR      | 18,394           | 16,335  | 112    | 57    | 75.28  | 43.08   | NA                     | NA      | NA     | NA    | NA    | NA    |
|            | VA                        | 6,203         | 7,977            | 32      | 23     | 63.53 | 35.31  | 6,203   | 7,977                  | 175     | 165    | 17.32 | 15.45 |       |
|            | Meta-analysis             | 321,531       | 338,974          | 600     | 601    | 22.82 | 21.68  | 303,137 | 322,639                | 4,866   | 4,154  | 15.32 | 15.17 |       |
|            | Gastrointestinal bleeding | CCAIE         | 32,609           | 32,486  | 20     | 31    | 7.56   | 11.77   | 32,609                 | 32,486  | 137    | 128   | 5.08  | 5.9   |
|            |                           | Clinformatics | 23,568           | 24,453  | 39     | 37    | 20.41  | 18.68   | 23,568                 | 24,453  | 227    | 189   | 13.45 | 13.14 |
|            |                           | MDCD          | 3,805            | 3,797   | 8      | 11    | 25.93  | 35.67   | 3,805                  | 3,797   | 58     | 35    | 23.17 | 17.82 |
|            |                           | MDCR          | 8,118            | 9,231   | 16     | 28    | 24.33  | 37.34   | 8,118                  | 9,231   | 172    | 170   | 21.23 | 21.34 |
|            |                           | OpenClaims    | 216,032          | 232,795 | 213    | 220   | 12.01  | 11.52   | 216,032                | 232,795 | 2,245  | 2,009 | 8.85  | 9.26  |
|            |                           | OptumEHR      | 18,530           | 16,391  | 37     | 22    | 24.62  | 16.54   | NA                     | NA      | NA     | NA    | NA    | NA    |
|            |                           | VA            | 6,211            | 7,952   | 31     | 31    | 61.43  | 47.76   | 6,211                  | 7,952   | 122    | 125   | 11.67 | 11.44 |
|            | Meta-analysis             | 308,873       | 327,105          | 364     | 380    | 14.41 | 14.2   | 290,343 | 310,714                | 2,961   | 2,656  | 9.3   | 9.69  |       |
|            | Acute renal failure       | CCAIE         | 32,576           | 32,451  | 50     | 36    | 18.94  | 13.68   | 32,576                 | 32,451  | 286    | 220   | 10.67 | 10.23 |
|            |                           | Clinformatics | 23,534           | 24,413  | 104    | 87    | 54.57  | 44.05   | 23,534                 | 24,413  | 476    | 444   | 28.9  | 31.72 |
|            |                           | MDCD          | 3,774            | 3,789   | 21     | 27    | 68.81  | 87.98   | 3,774                  | 3,789   | 110    | 77    | 46.36 | 40.34 |
|            |                           | MDCR          | 8,091            | 9,224   | 47     | 31    | 71.85  | 41.38   | 8,091                  | 9,224   | 348    | 311   | 44.2  | 40.07 |
|            |                           | OpenClaims    | 215,716          | 232,429 | 500    | 603   | 28.26  | 31.64   | 215,716                | 232,429 | 4,977  | 4,565 | 20.04 | 21.49 |
|            |                           | OptumEHR      | 18,134           | 16,262  | 86     | 70    | 58.59  | 53.16   | NA                     | NA      | NA     | NA    | NA    | NA    |
|            |                           | VA            | 6,133            | 7,907   | 146    | 117   | 296.69 | 182.62  | 6,133                  | 7,907   | 416    | 410   | 42.7  | 39.97 |
|            | Meta-analysis             | NA            | NA               | NA      | NA     | NA    | NA     | 289,824 | 310,213                | 6,613   | 6,027  | 21.22 | 22.5  |       |

Table S7, continued.

| Comparison | Outcome                 | Database      | 30-day follow-up |         |        |       |        |         | On-treatment follow-up |         |        |      |      |       |
|------------|-------------------------|---------------|------------------|---------|--------|-------|--------|---------|------------------------|---------|--------|------|------|-------|
|            |                         |               | Patients         |         | Events |       | IR     |         | Patients               |         | Events |      | IR   |       |
|            |                         |               | T                | C       | T      | C     | T      | C       | T                      | C       | T      | C    | T    | C     |
| AZM vs AMX | End stage renal disease | AmbEMR        | NA               | NA      | NA     | NA    | NA     | NA      | 13,197                 | 12,079  | 7      | 5    | 1.18 | 1     |
|            |                         | CCAIE         | 32,620           | 32,518  | <5     | <5    | <1.89  | <1.90   | 32,620                 | 32,518  | 30     | 20   | 1.1  | 0.91  |
|            |                         | Clinformatics | 23,594           | 24,521  | <5     | 6     | <2.61  | 3.02    | 23,594                 | 24,521  | 31     | 36   | 1.8  | 2.46  |
|            |                         | MDCD          | 3,806            | 3,809   | <5     | <5    | <16.20 | <16.15  | 3,806                  | 3,809   | 18     | 10   | 6.96 | 4.96  |
|            |                         | MDCR          | 8,130            | 9,270   | 7      | <5    | 10.62  | <6.63   | 8,130                  | 9,270   | 23     | 28   | 2.75 | 3.4   |
|            |                         | OpenClaims    | 216,166          | 233,078 | 36     | 41    | 2.03   | 2.14    | 216,166                | 233,078 | 558    | 507  | 2.16 | 2.3   |
|            |                         | OptumEHR      | 18,557           | 16,465  | 9      | 5     | 5.98   | 3.74    | NA                     | NA      | NA     | NA   | NA   | NA    |
|            |                         | VA            | 6,232            | 8,003   | 8      | <5    | 15.77  | <7.64   | 6,232                  | 8,003   | 37     | 38   | 3.48 | 3.39  |
|            | Meta-analysis           | 309,105       | 327,664          | <75     | <72    | <2.97 | <2.69  | 303,745 | 323,278                | 704     | 644    | 2.13 | 2.27 |       |
|            | Hepatic failure         | CCAIE         | 32,621           | 32,519  | <5     | 5     | <1.89  | 1.9     | 32,621                 | 32,519  | 30     | 28   | 1.1  | 1.28  |
|            |                         | Clinformatics | 23,592           | 24,516  | <5     | <5    | <2.61  | <2.52   | 23,592                 | 24,516  | 38     | 27   | 2.2  | 1.84  |
|            |                         | MDCD          | 3,807            | 3,809   | <5     | <5    | <16.19 | <16.15  | 3,807                  | 3,809   | 6      | 6    | 2.3  | 2.94  |
|            |                         | MDCR          | 8,130            | 9,269   | <5     | <5    | <7.58  | <6.63   | 8,130                  | 9,269   | 18     | 15   | 2.15 | 1.81  |
|            |                         | OpenClaims    | 216,181          | 233,088 | 22     | 27    | 1.24   | 1.41    | 216,181                | 233,088 | 306    | 311  | 1.18 | 1.41  |
|            |                         | OptumEHR      | 18,548           | 16,466  | 15     | 11    | 9.97   | 8.23    | NA                     | NA      | NA     | NA   | NA   | NA    |
|            |                         | VA            | 6,233            | 8,005   | 6      | <5    | 11.82  | <7.64   | 6,233                  | 8,005   | 26     | 19   | 2.42 | 1.69  |
|            |                         | Meta-analysis | 309,112          | 327,672 | <63    | <63   | <2.49  | <2.35   | 290,564                | 311,206 | 424    | 406  | 1.31 | 1.45  |
|            | Acute pancreatitis      | CCAIE         | 32,611           | 32,513  | 6      | 8     | 2.27   | 3.03    | 32,611                 | 32,513  | 70     | 55   | 2.58 | 2.52  |
|            |                         | Clinformatics | 23,590           | 24,511  | 11     | 10    | 5.75   | 5.03    | 23,590                 | 24,511  | 62     | 49   | 3.62 | 3.36  |
|            |                         | MDCD          | 3,800            | 3,808   | <5     | 5     | <16.22 | 16.16   | 3,800                  | 3,808   | 23     | 21   | 9.06 | 10.48 |
|            |                         | MDCR          | 8,129            | 9,268   | <5     | <5    | <7.59  | <6.63   | 8,129                  | 9,268   | 32     | 32   | 3.84 | 3.89  |
|            |                         | OpenClaims    | 216,145          | 232,998 | 64     | 80    | 3.61   | 4.18    | 216,145                | 232,998 | 713    | 595  | 2.77 | 2.7   |
|            |                         | OptumEHR      | 18,572           | 16,463  | 7      | 9     | 4.65   | 6.74    | NA                     | NA      | NA     | NA   | NA   | NA    |
|            |                         | VA            | 6,232            | 7,995   | 7      | 6     | 13.8   | 9.18    | 6,232                  | 7,995   | 39     | 41   | 3.68 | 3.68  |
|            |                         | Meta-analysis | 309,079          | 327,556 | <105   | <123  | <4.15  | <4.59   | 290,507                | 311,093 | 939    | 793  | 2.91 | 2.85  |

T=target therapy; C=comparator therapy; IR=incidence rate; py=person-years at risk; NA=non-applicable (not reported because of failed diagnostics or on-treatment follow-up unavailable); CV=cardiovascular; HCQ=hydroxychloroquine; SSZ=sulfasalazine; AZM=HCQ+Azithromycin; AMX=HCQ+amoxicillin; AmbEMR=IQVIA Ambulatory EMR; CCAIE=IBM Commercial Database; Clinformatics=Optum de-identified Clinformatics Data Mart Database; CPRD=Clinical Practice Research Datalink; DAGermany=IQVIA Disease Analyzer Germany; IMRD=IQVIA UK Integrated Medical Record Data; MDCD=IBM IBM Multi-state Medicaid; MDCR=IBM Medicare Supplemental Database; OpenClaims=IQVIA Open Claims; OptumEHR=Optum de-identified Electronic Health Record dataset; VA=Department of Veterans Affairs

**S8. Calibrated hazard ratio forest plots**

**S8.1. 30-day follow-up**

**S8.1.1. All-cause mortality**

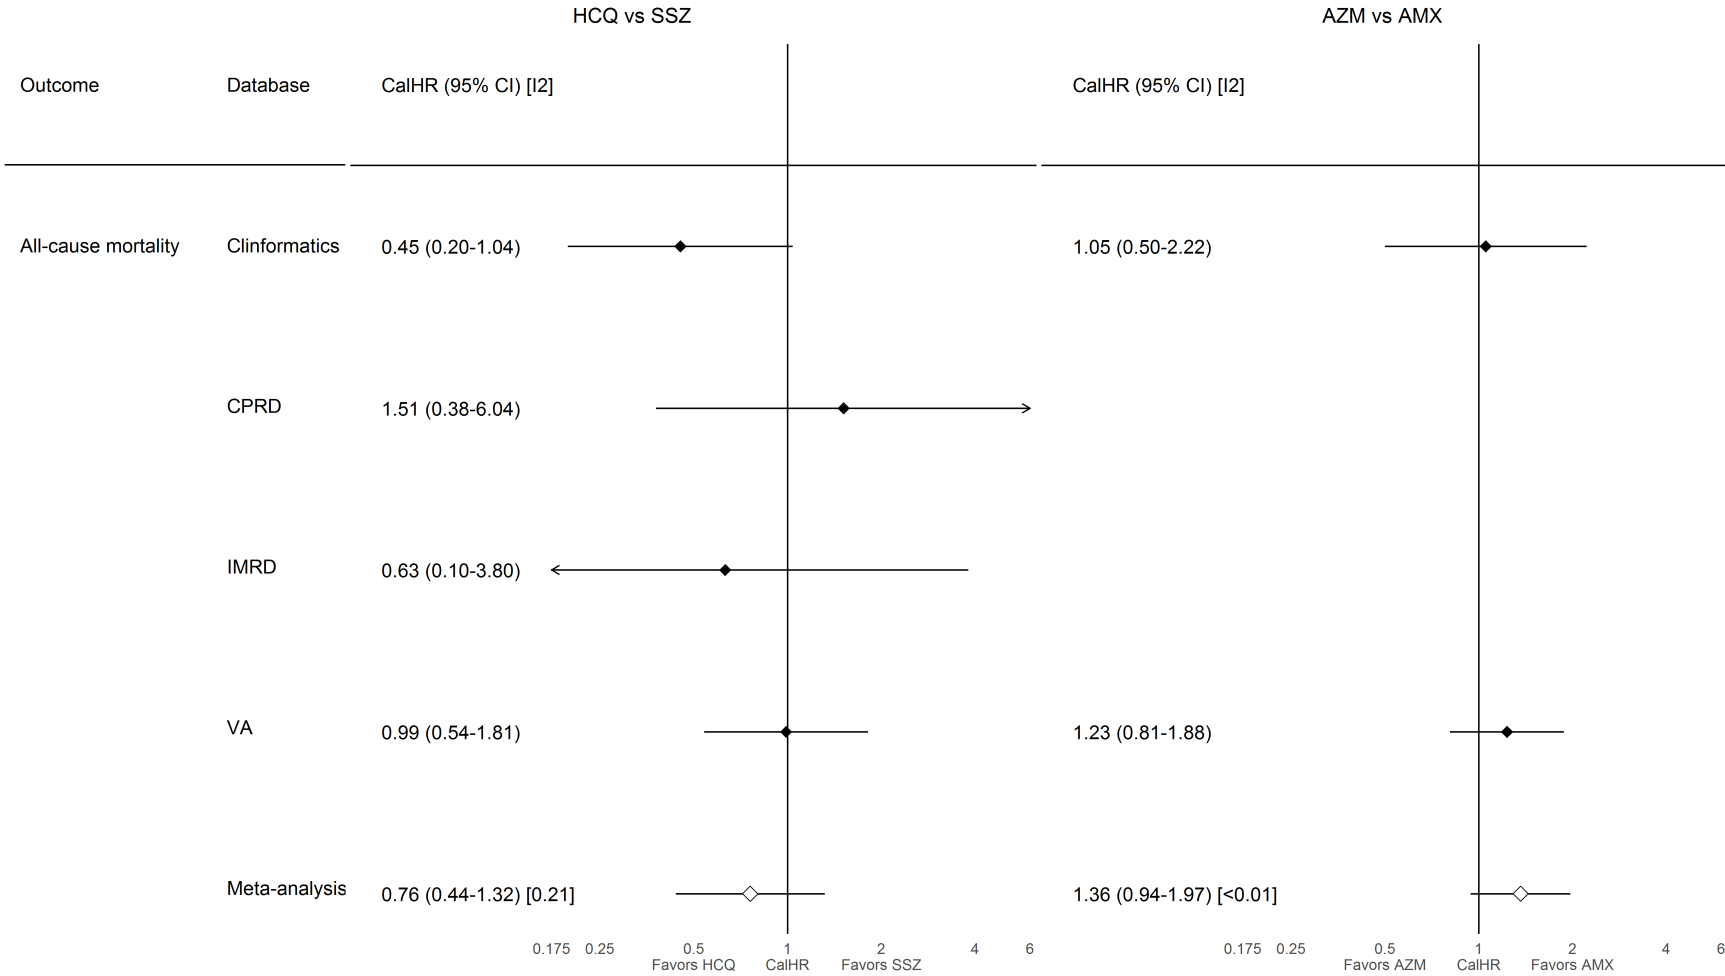

S8.1.2. CV-related mortality

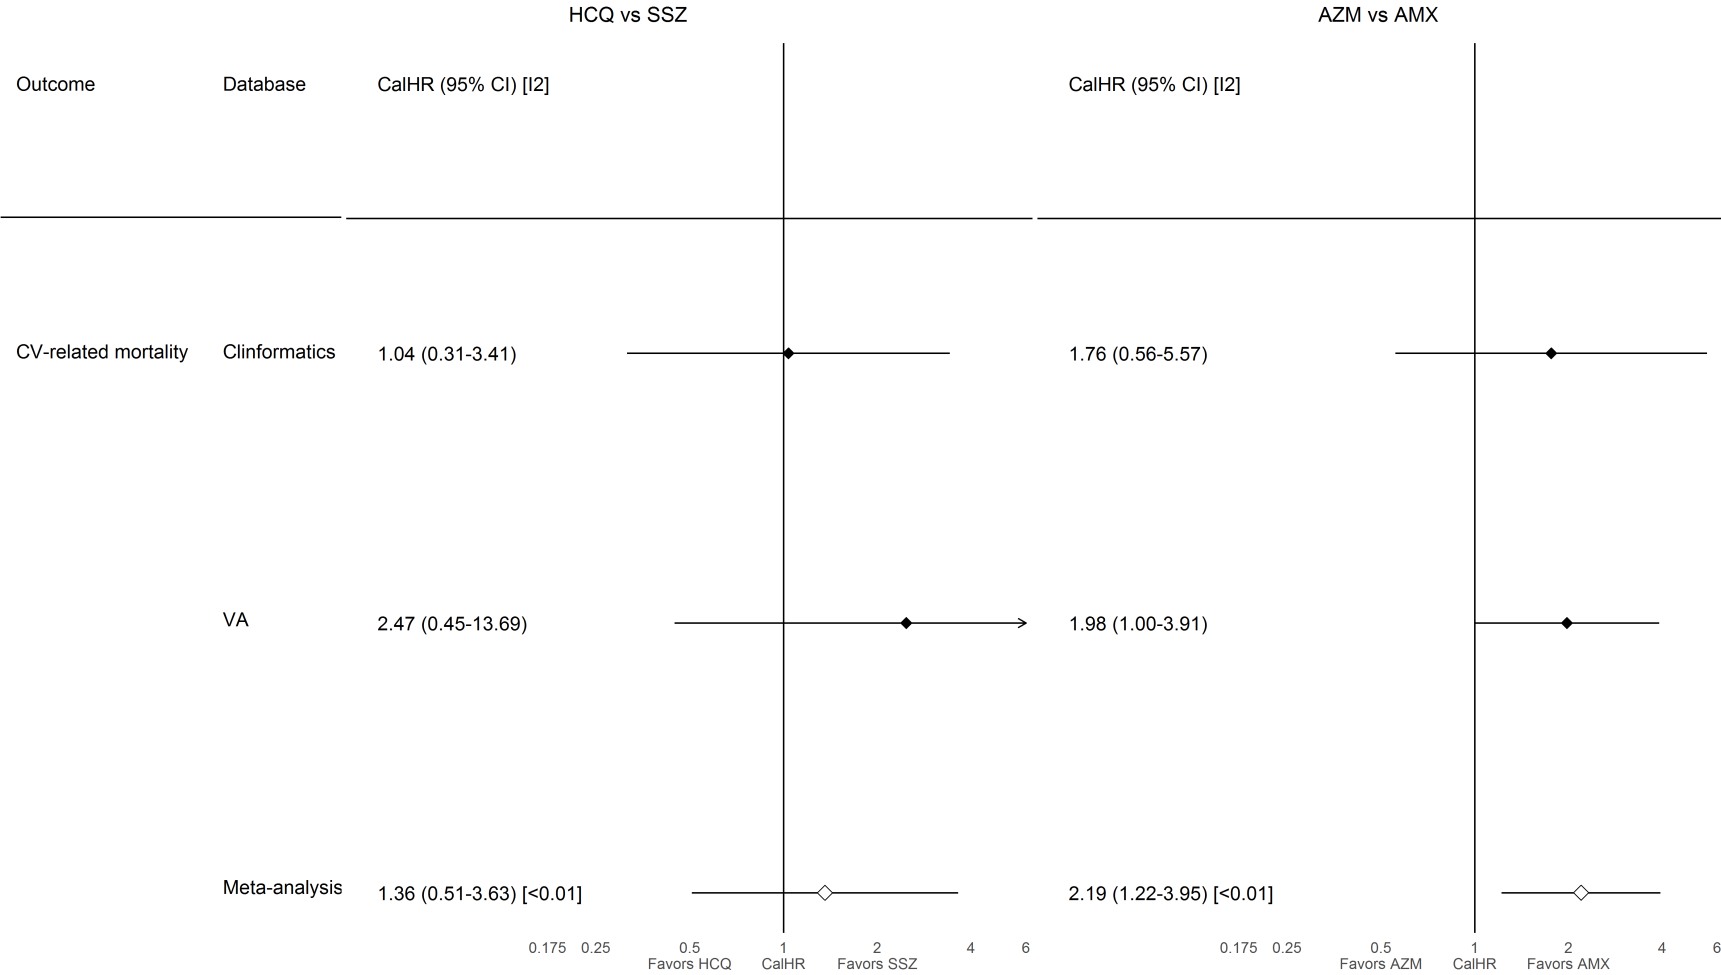

**S8.1.3. Myocardial infarction**

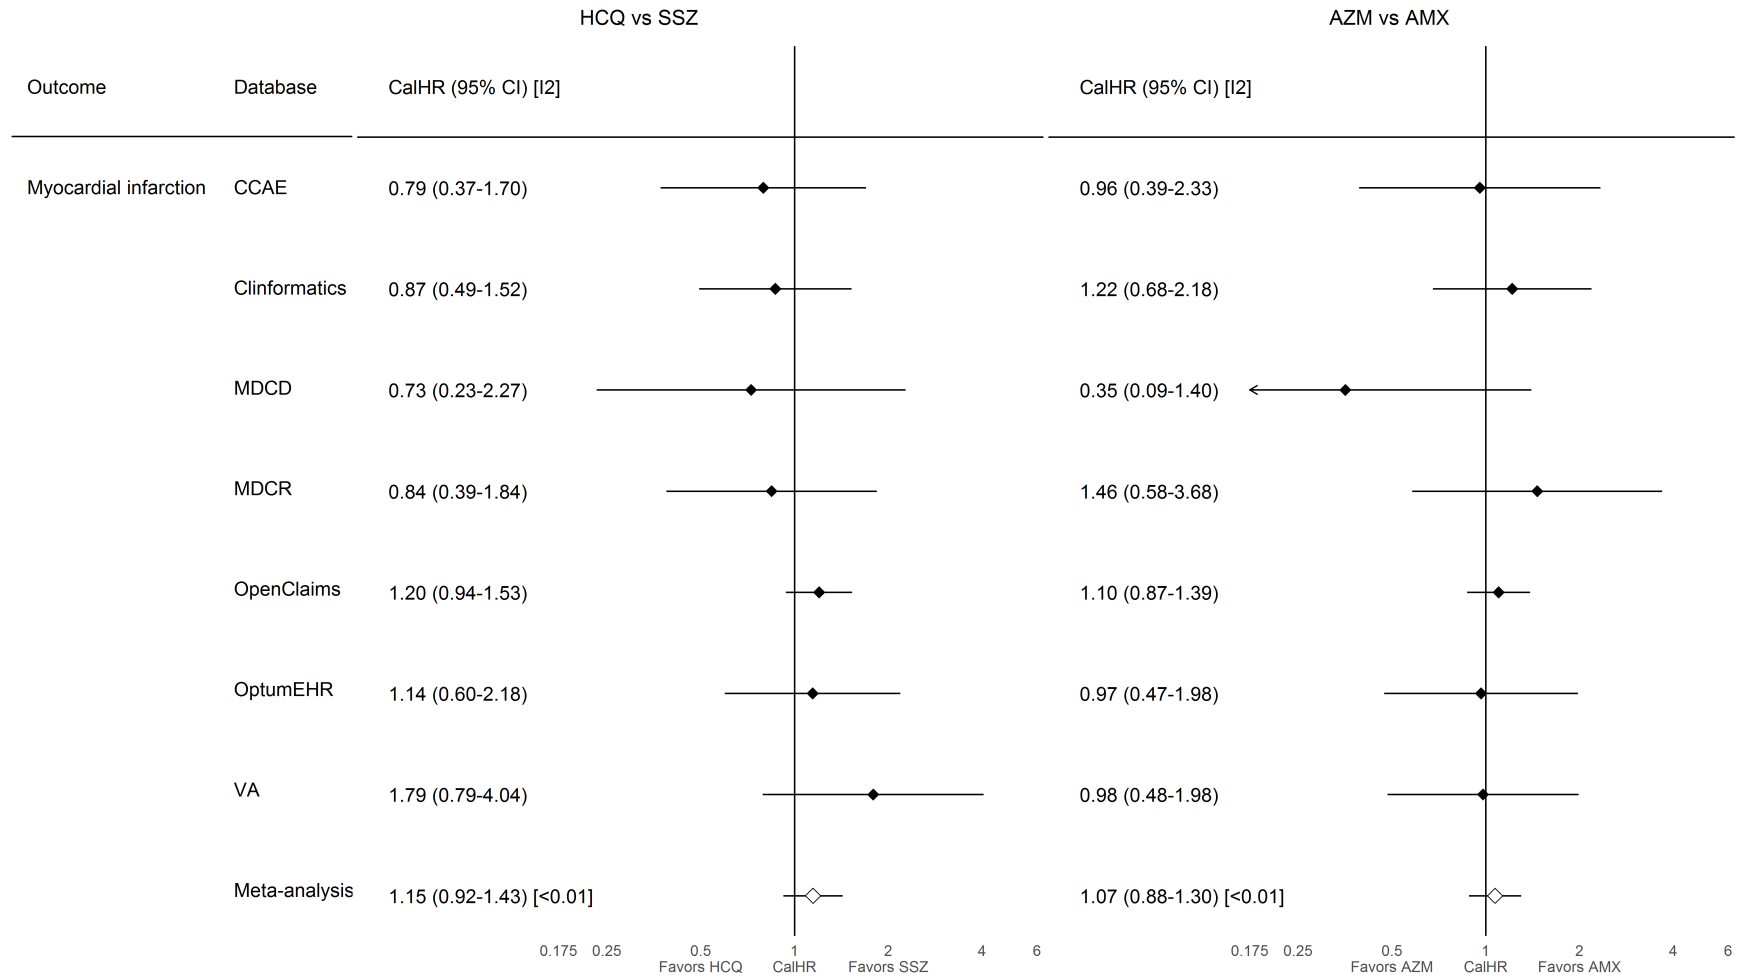

S8.1.4. Chest pain or angina

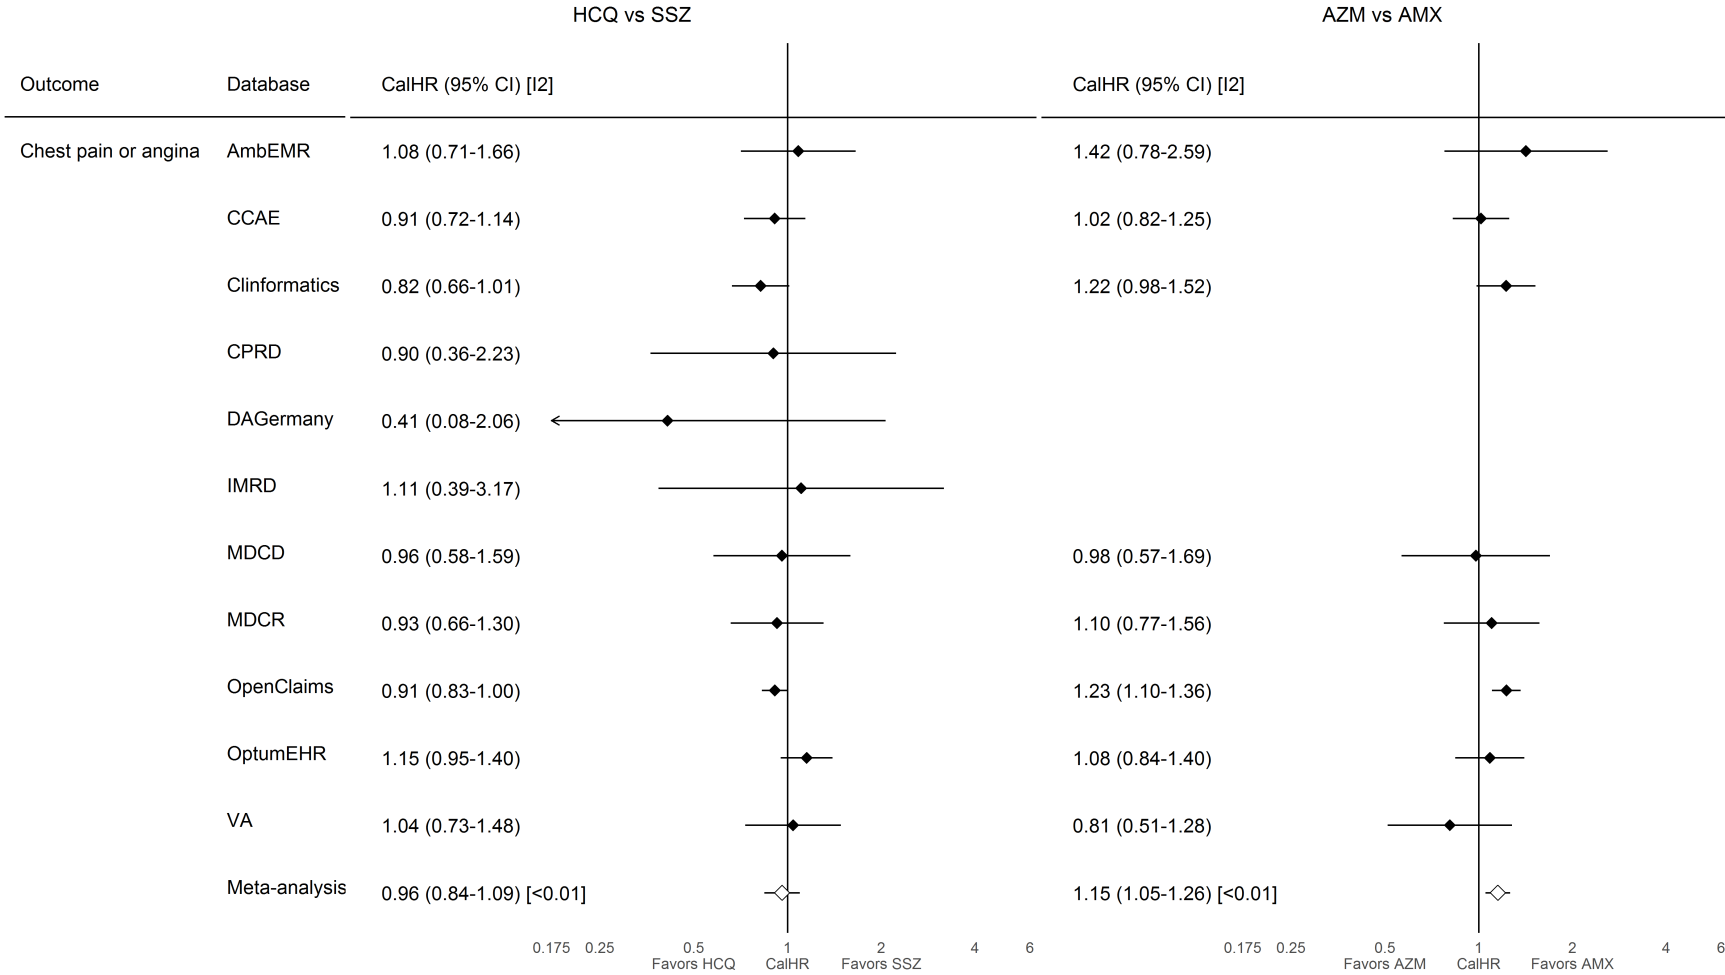



S8.1.5. Heart failure

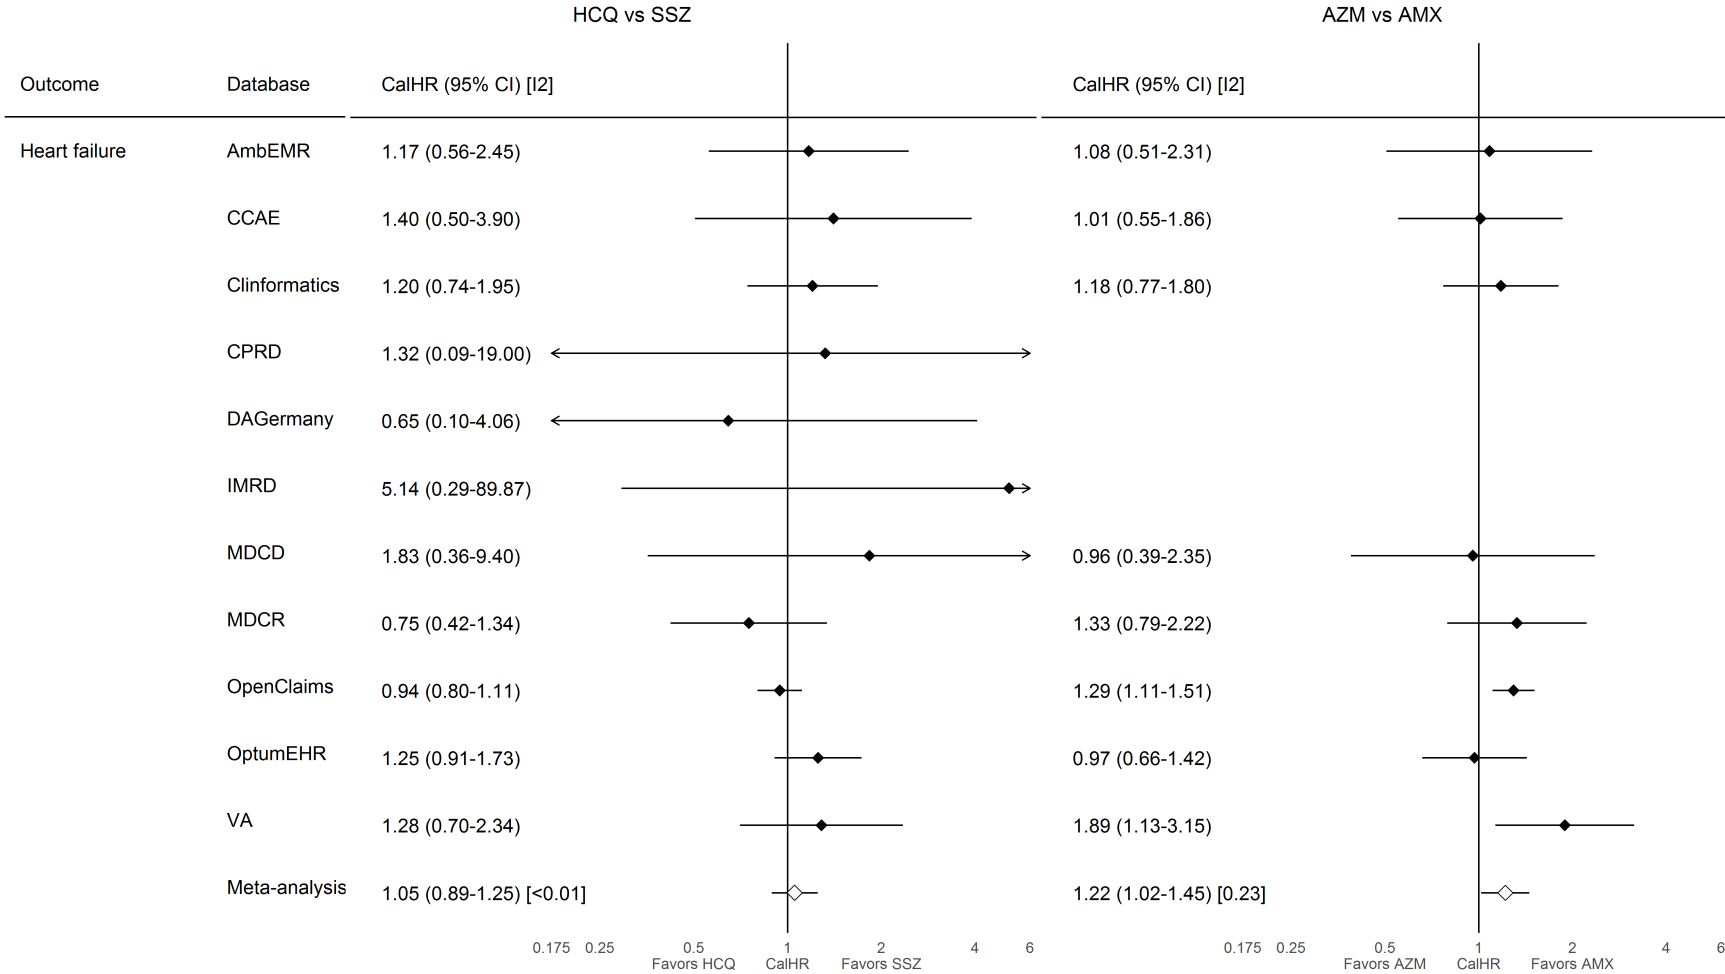

**S8.1.6. Cardiovascular events**

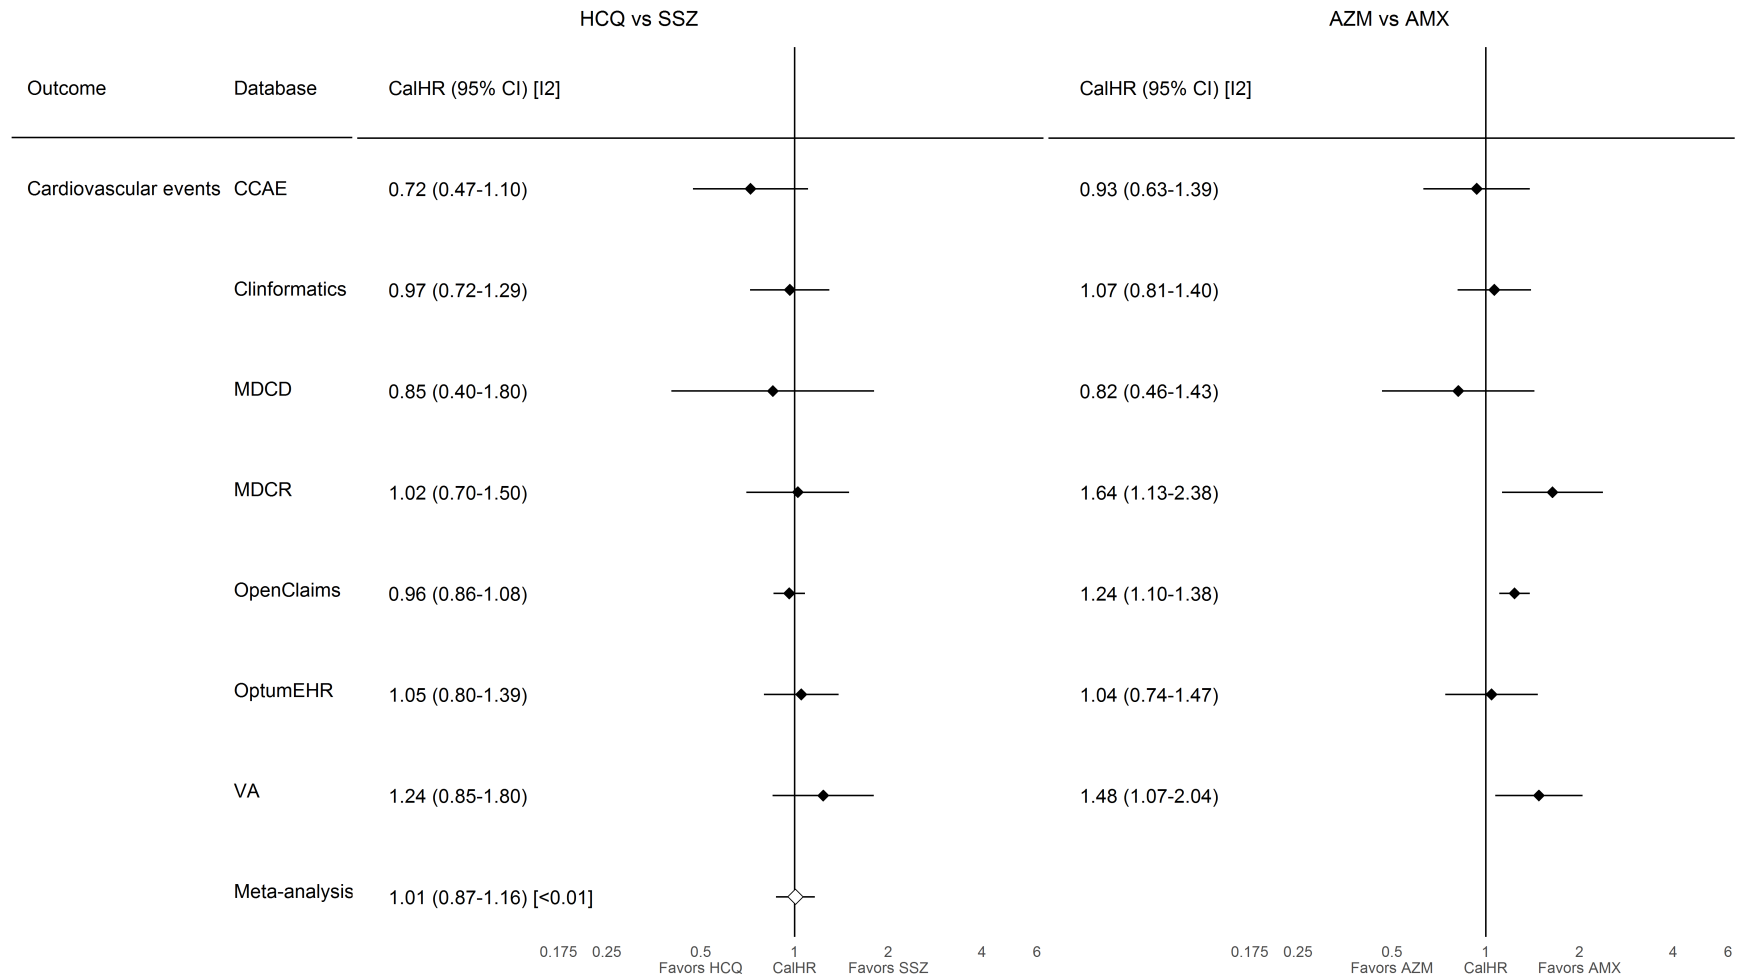

S8.1.7. Cardiac arrhythmia

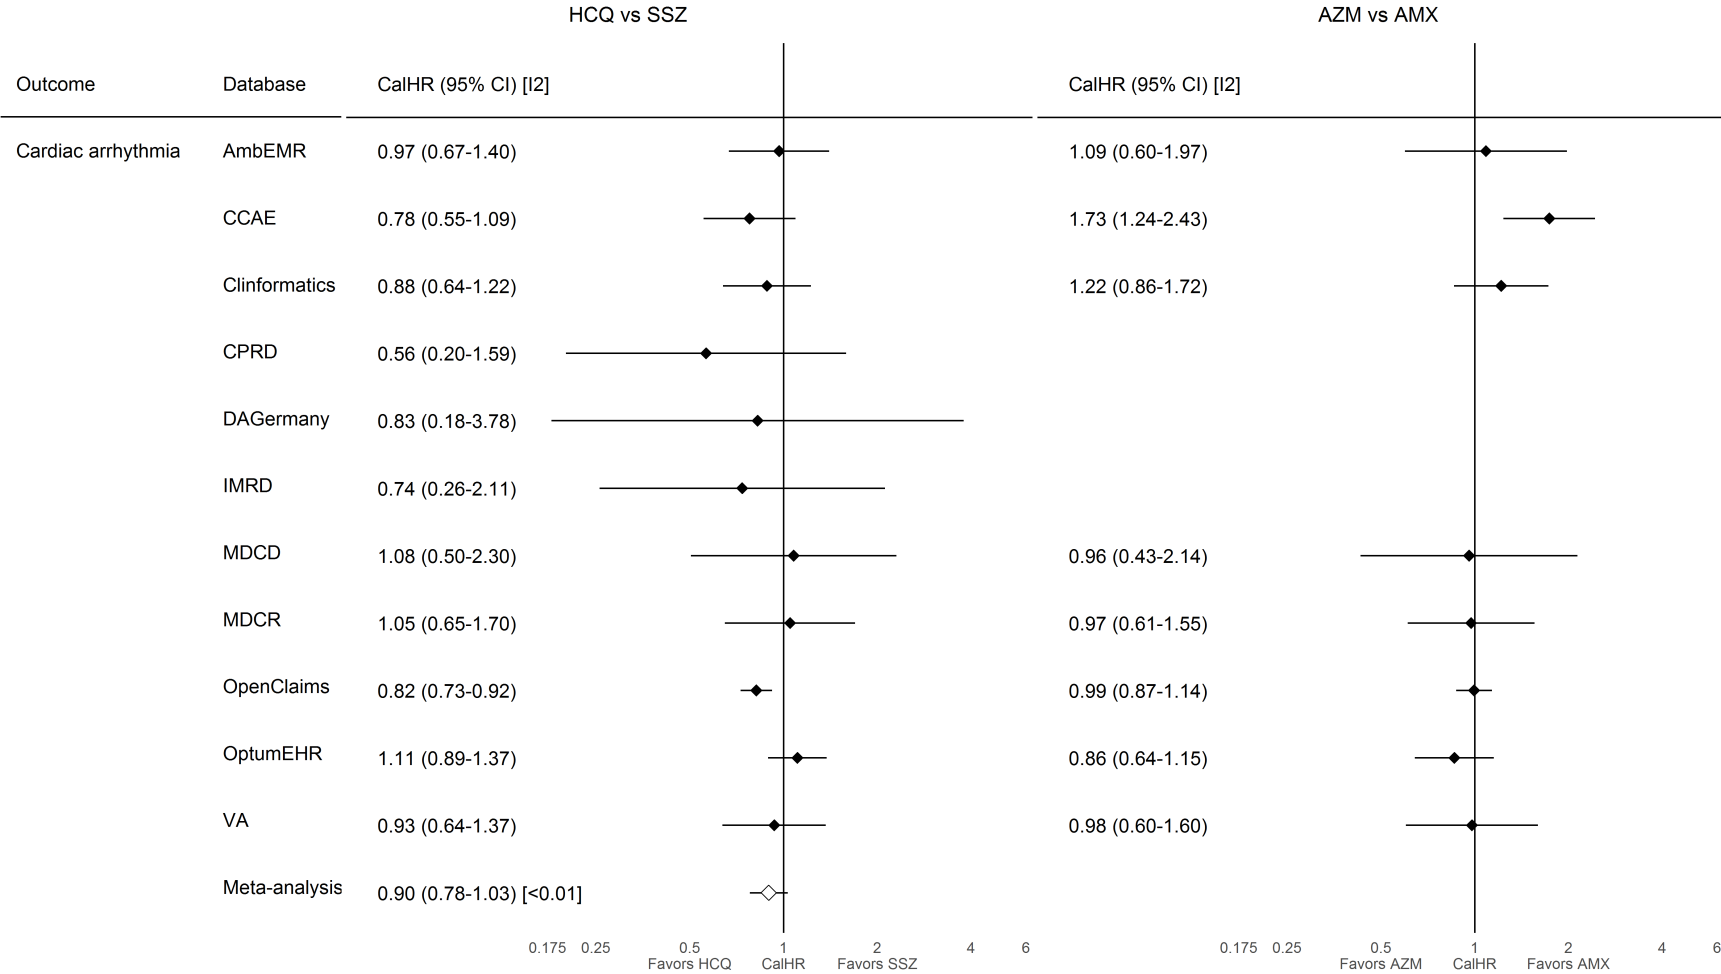

**S8.1.8. Bradycardia**

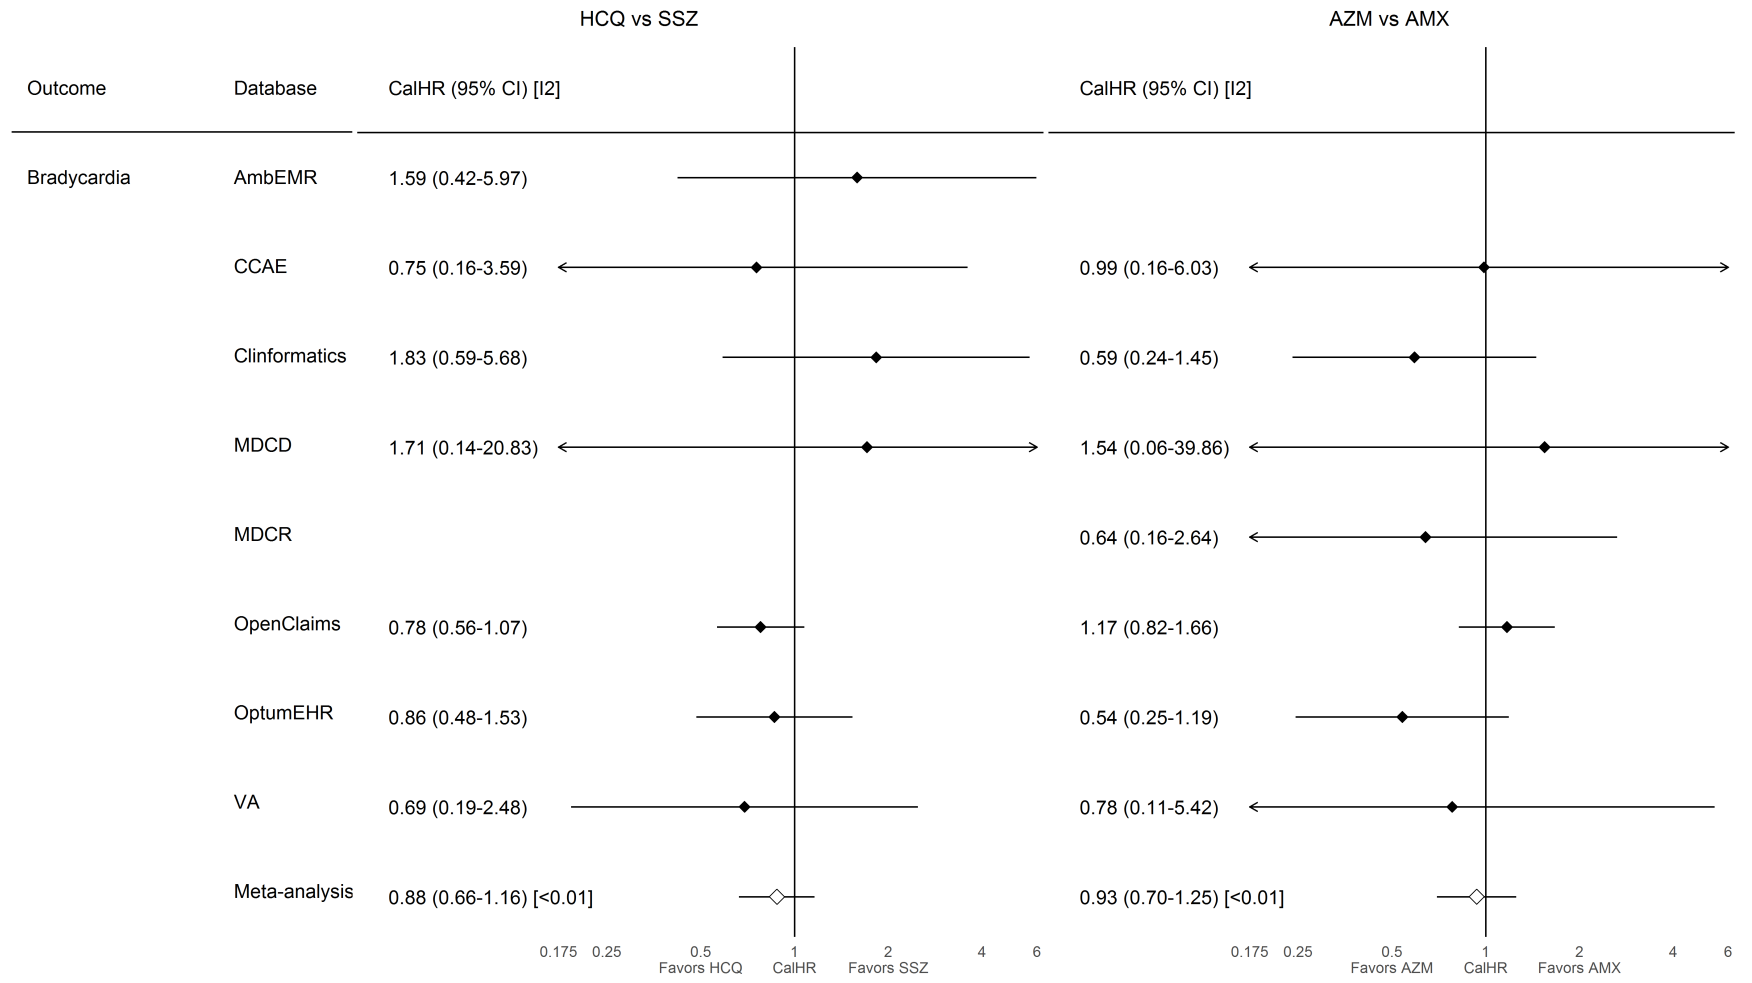

S8.1.9. Transient ischemic attack

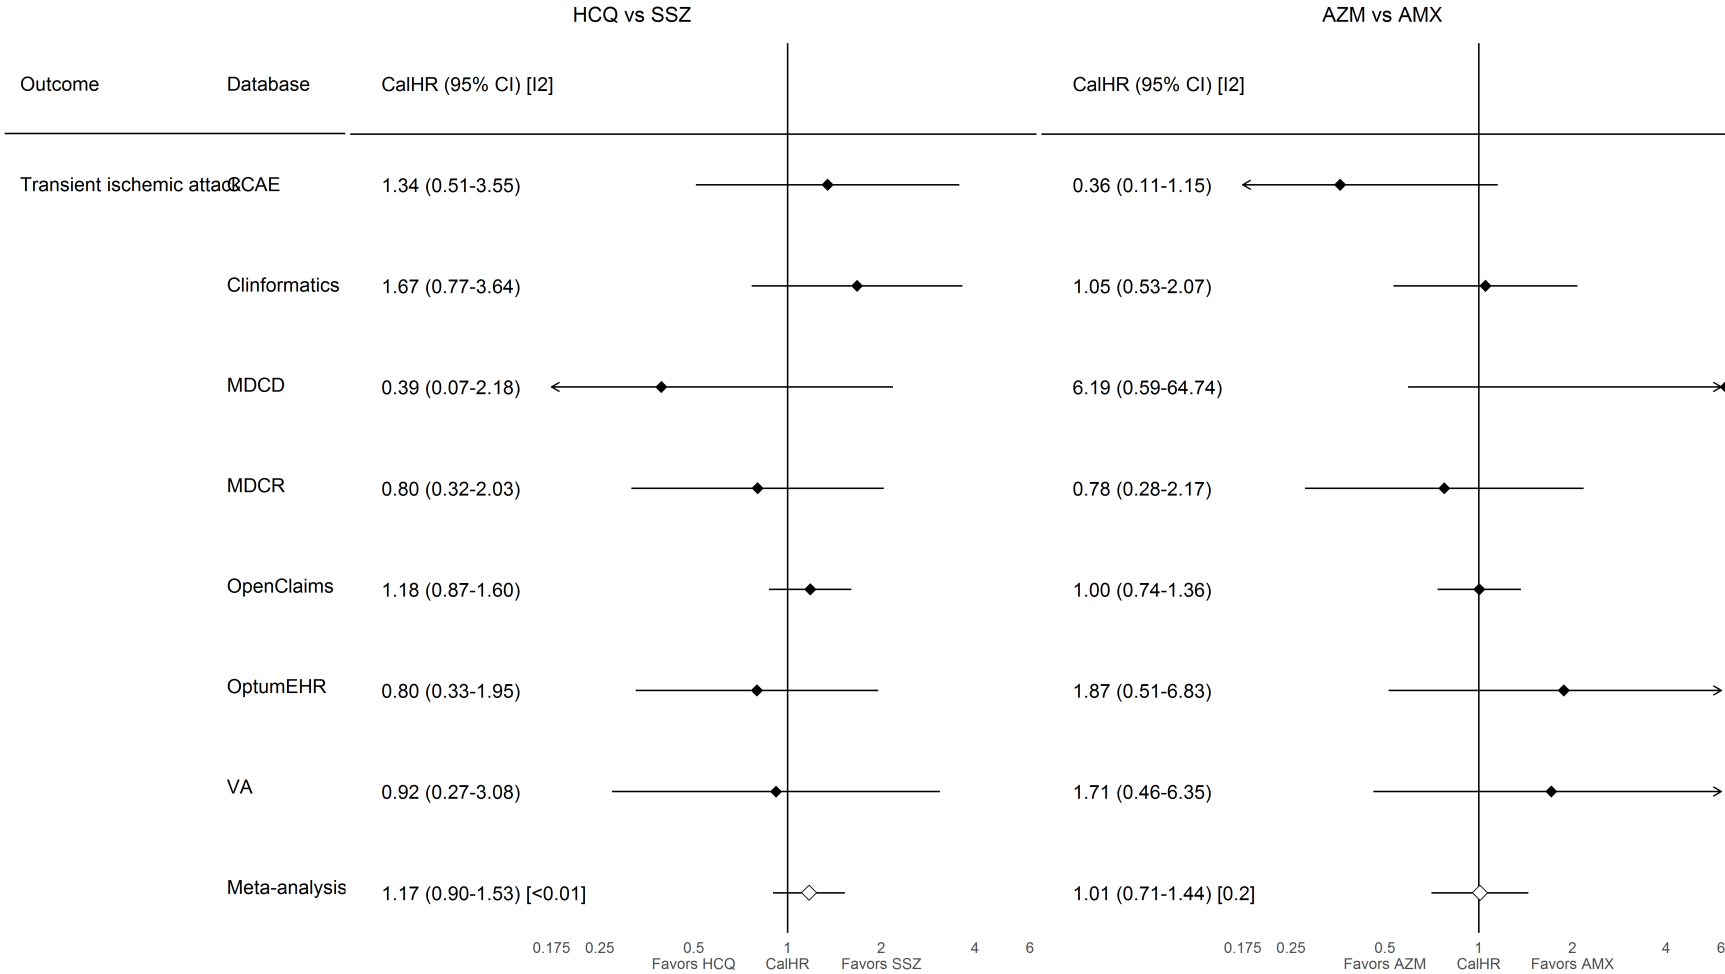

S8.1.10. Stroke

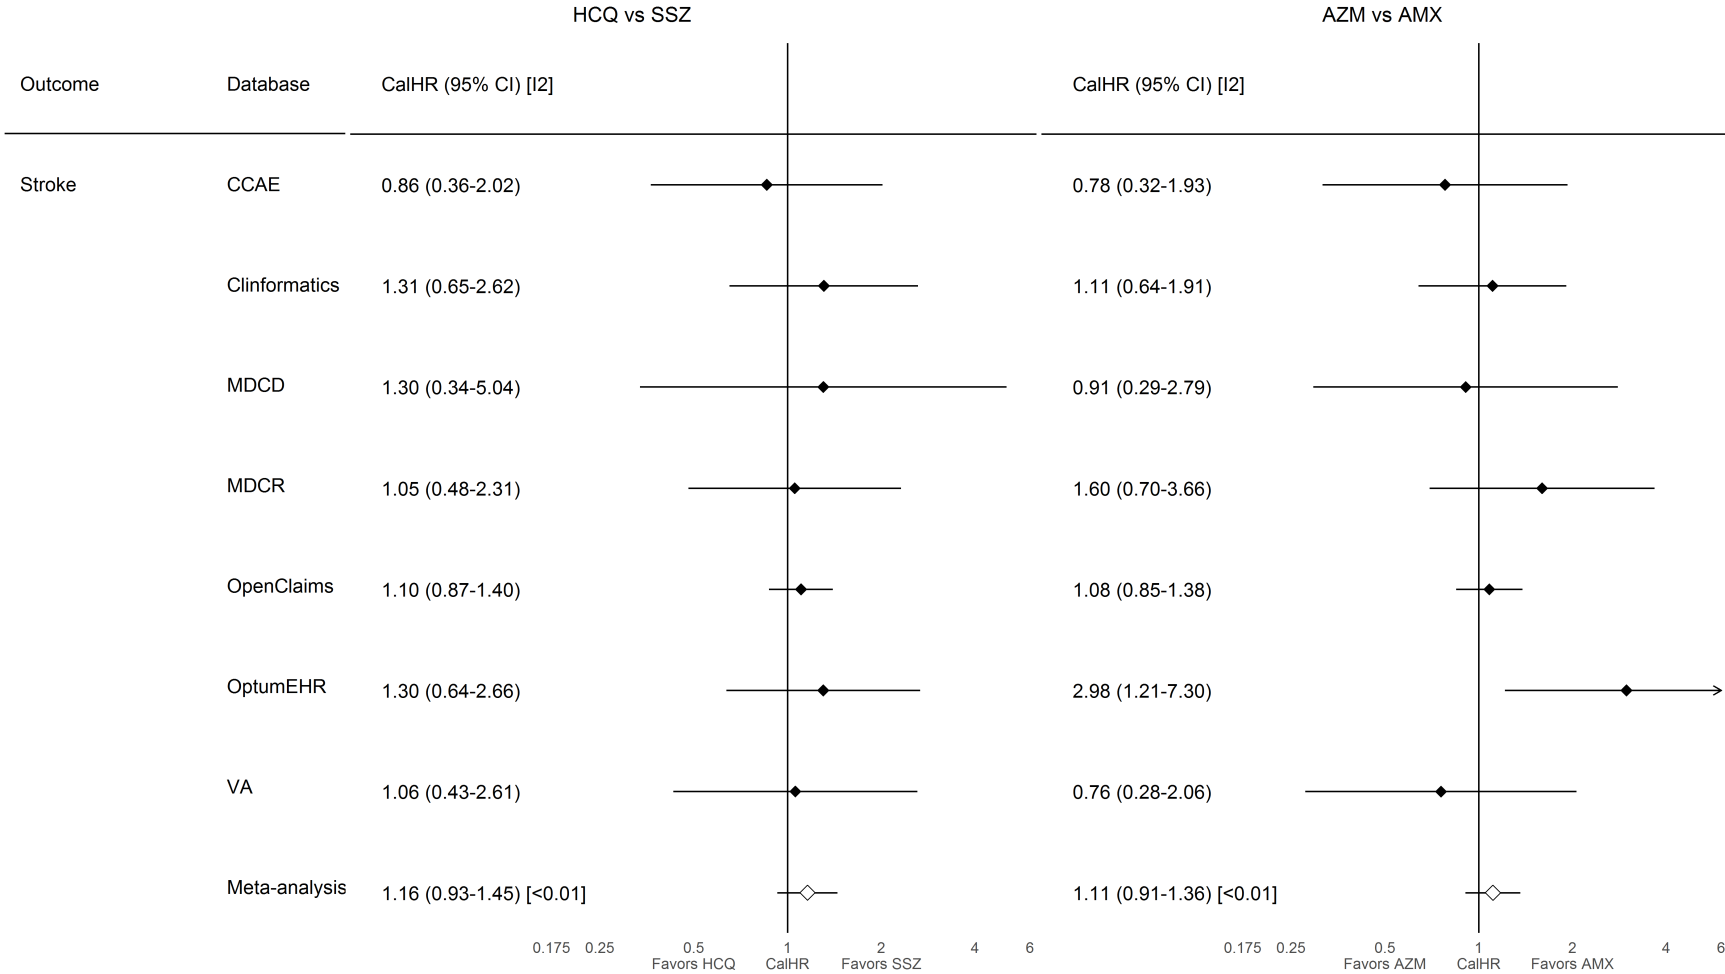

S8.1.11. Venous thromboembolism

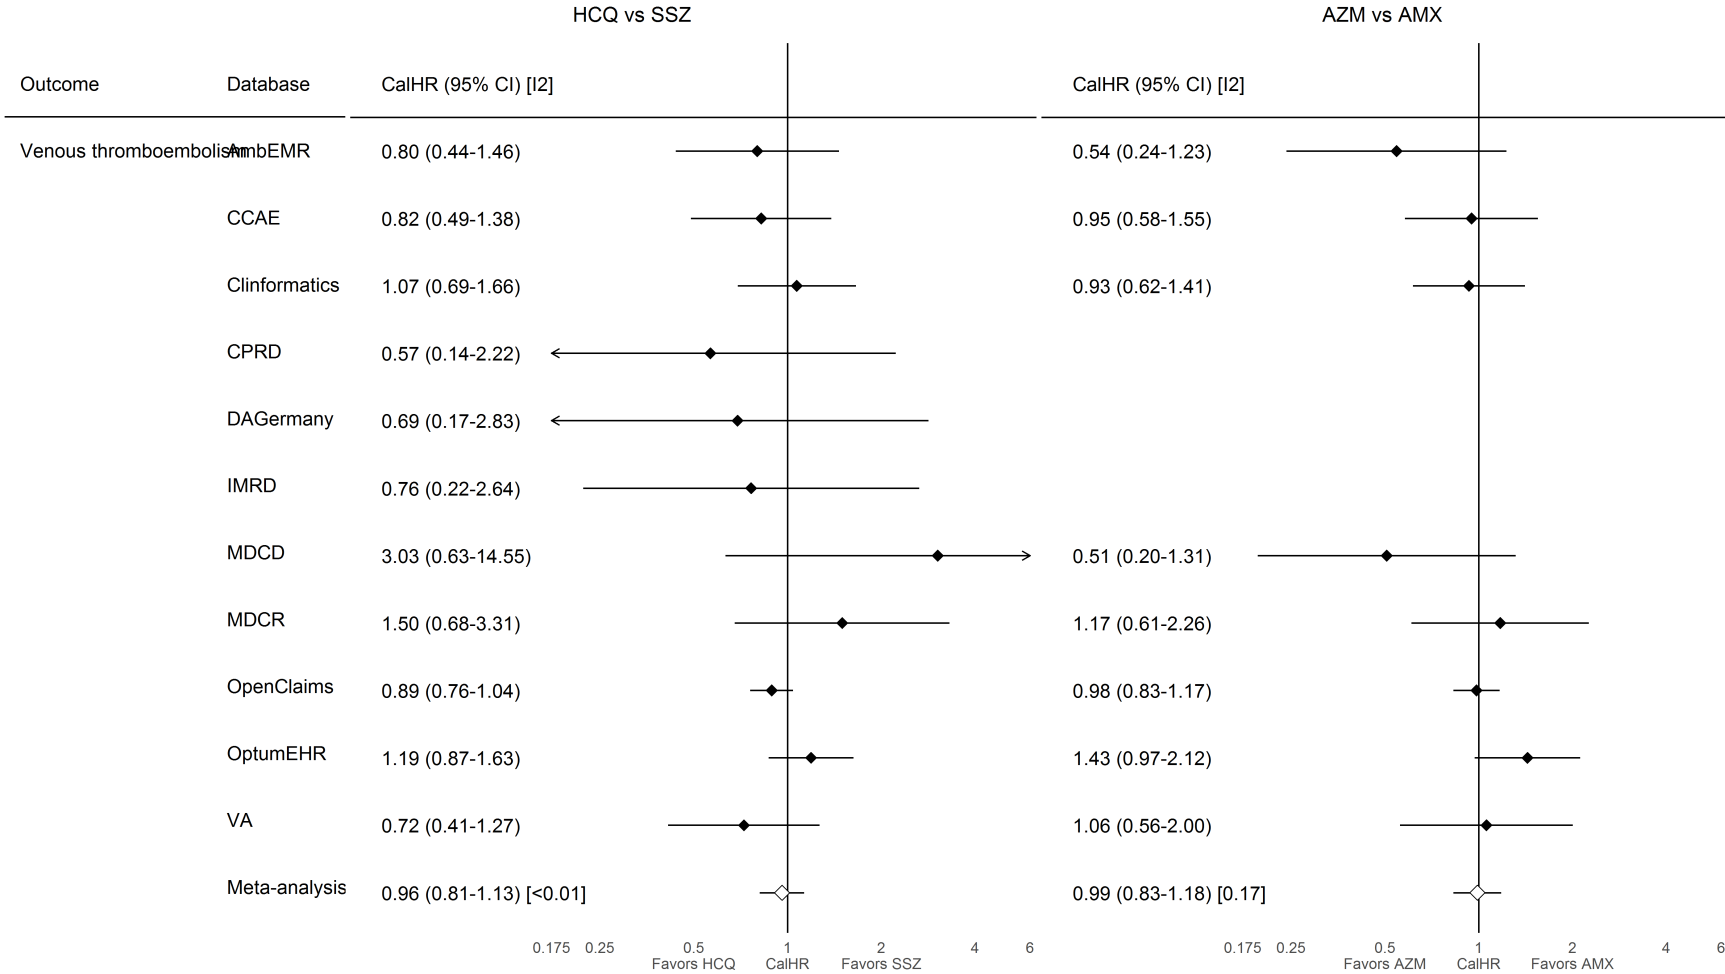

**S8.1.12. Gastrointestinal bleeding**

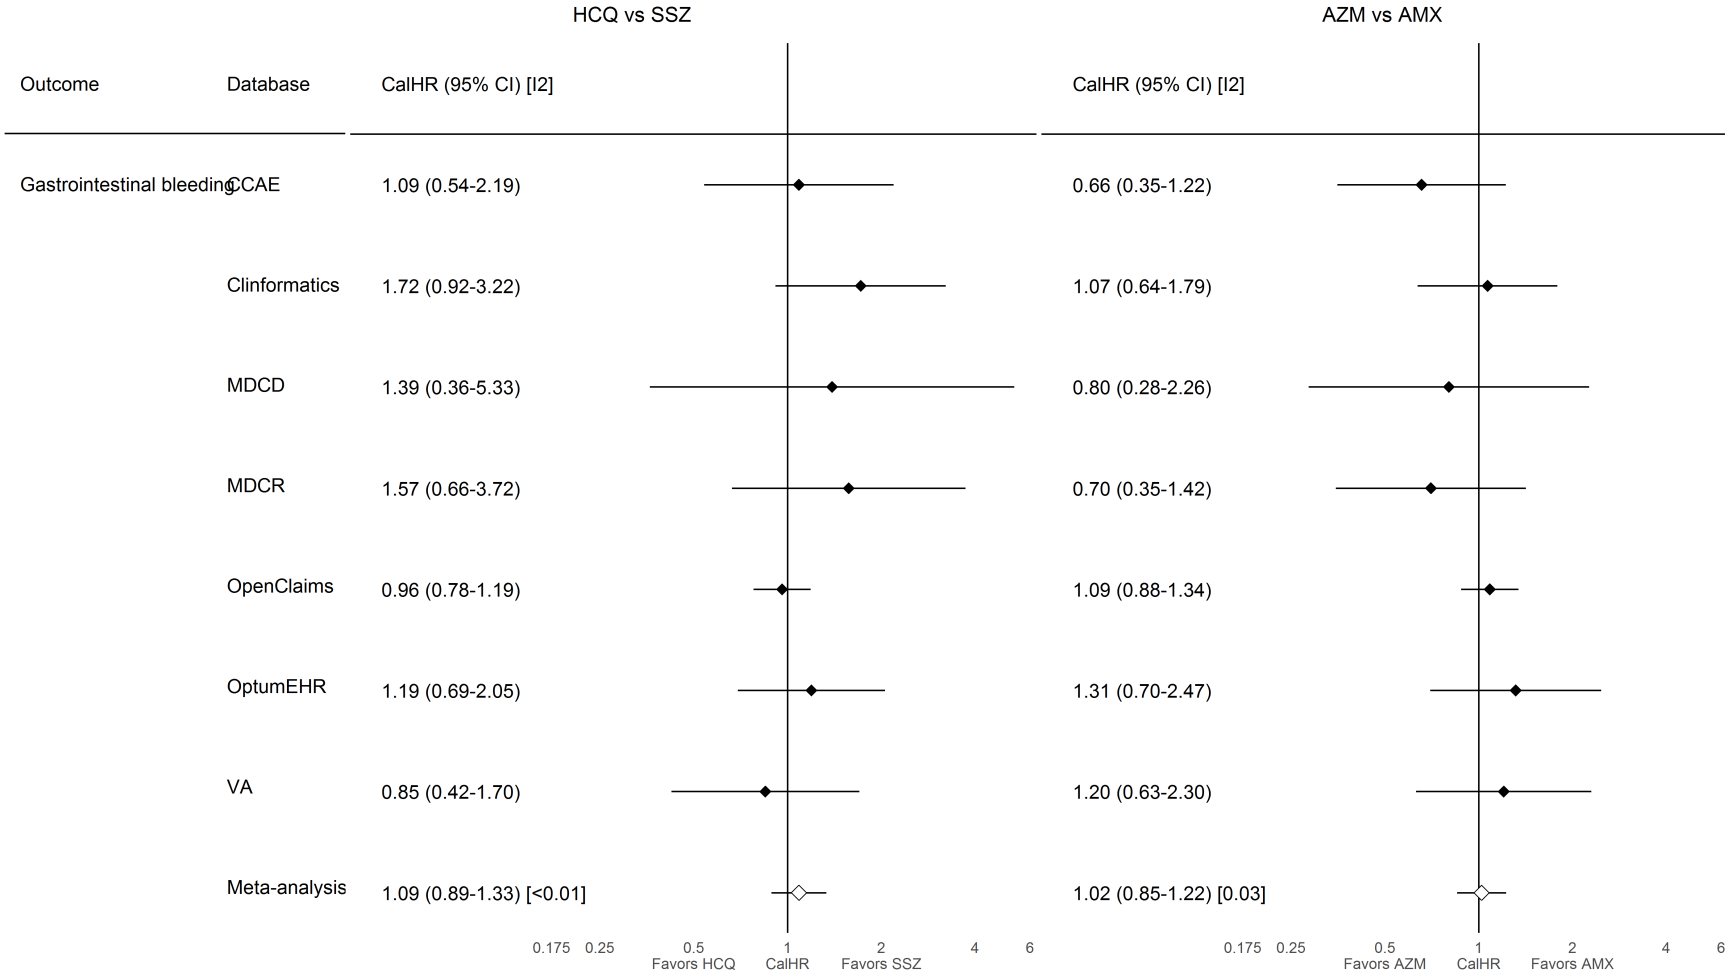



**S8.1.13. Acute renal failure**

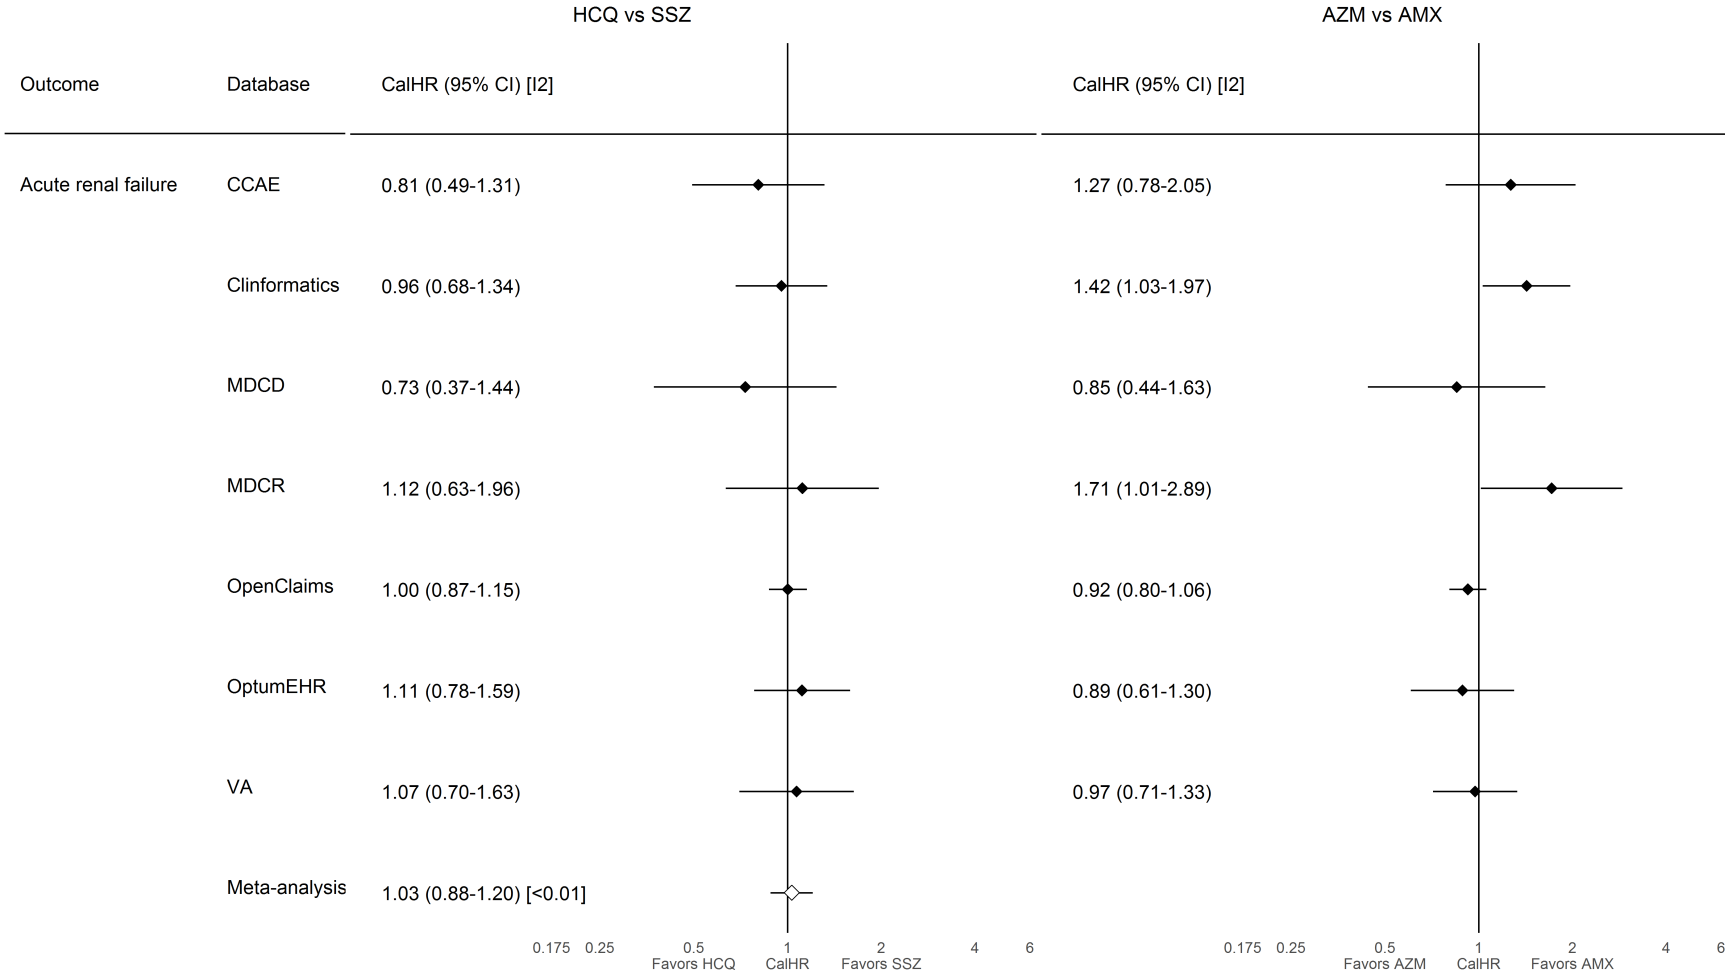

**S8.1.14. End stage renal disease**

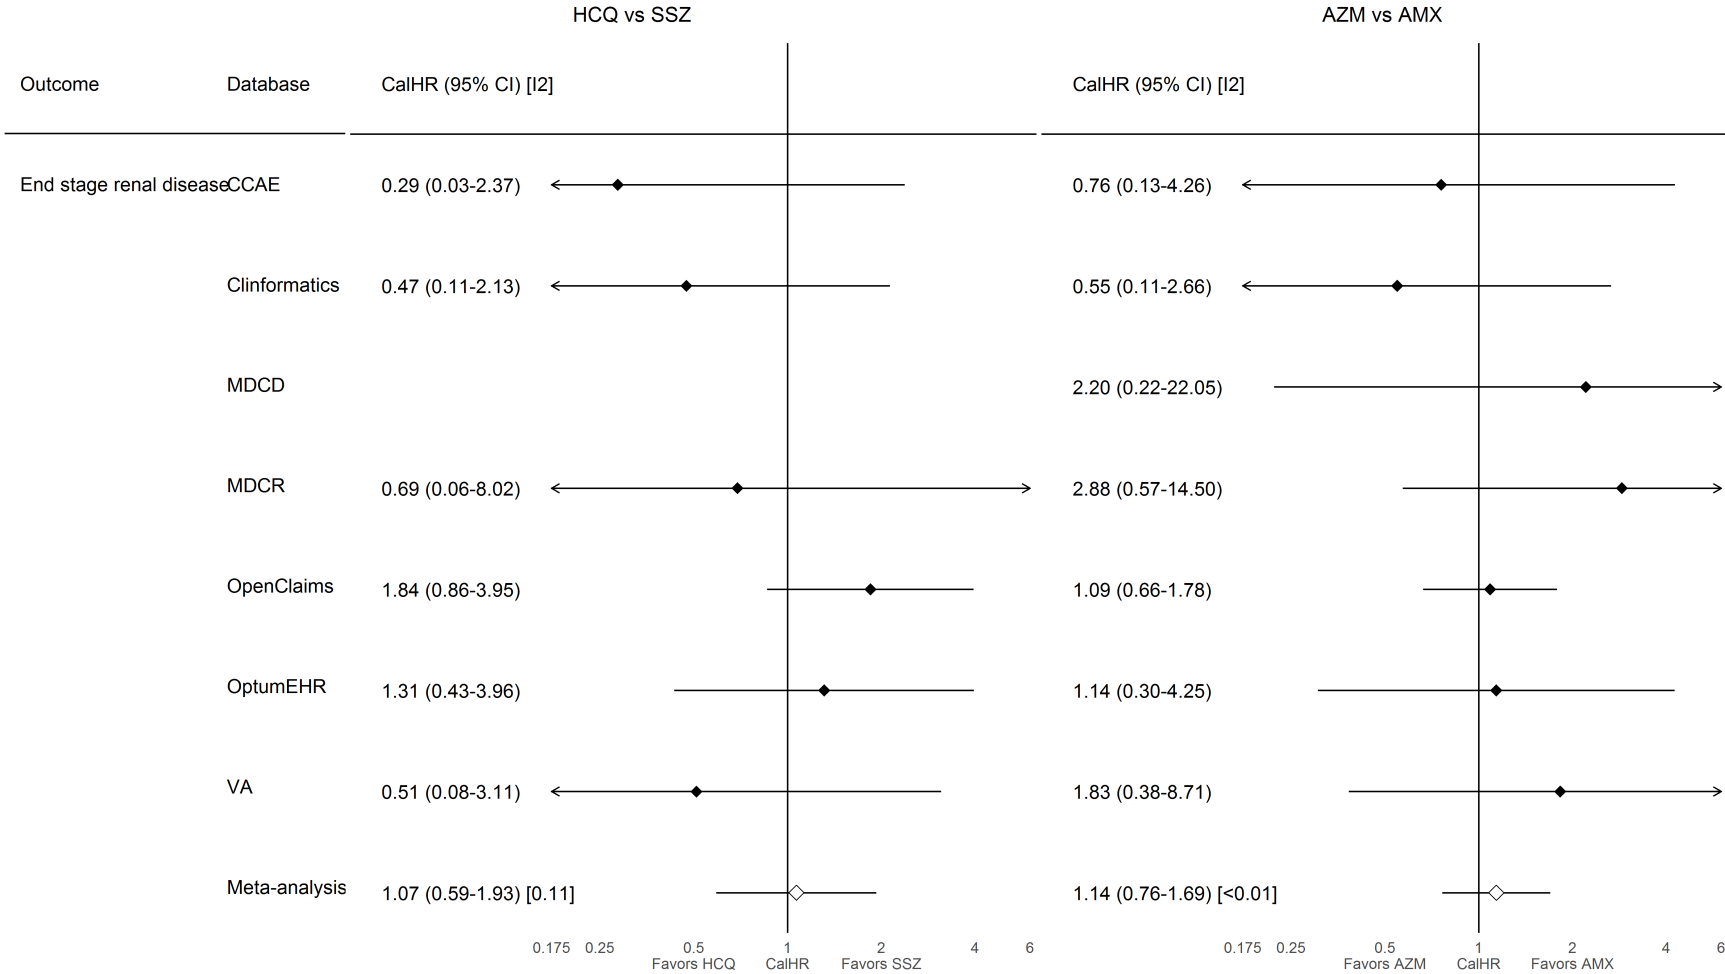

S8.1.15. Hepatic failure

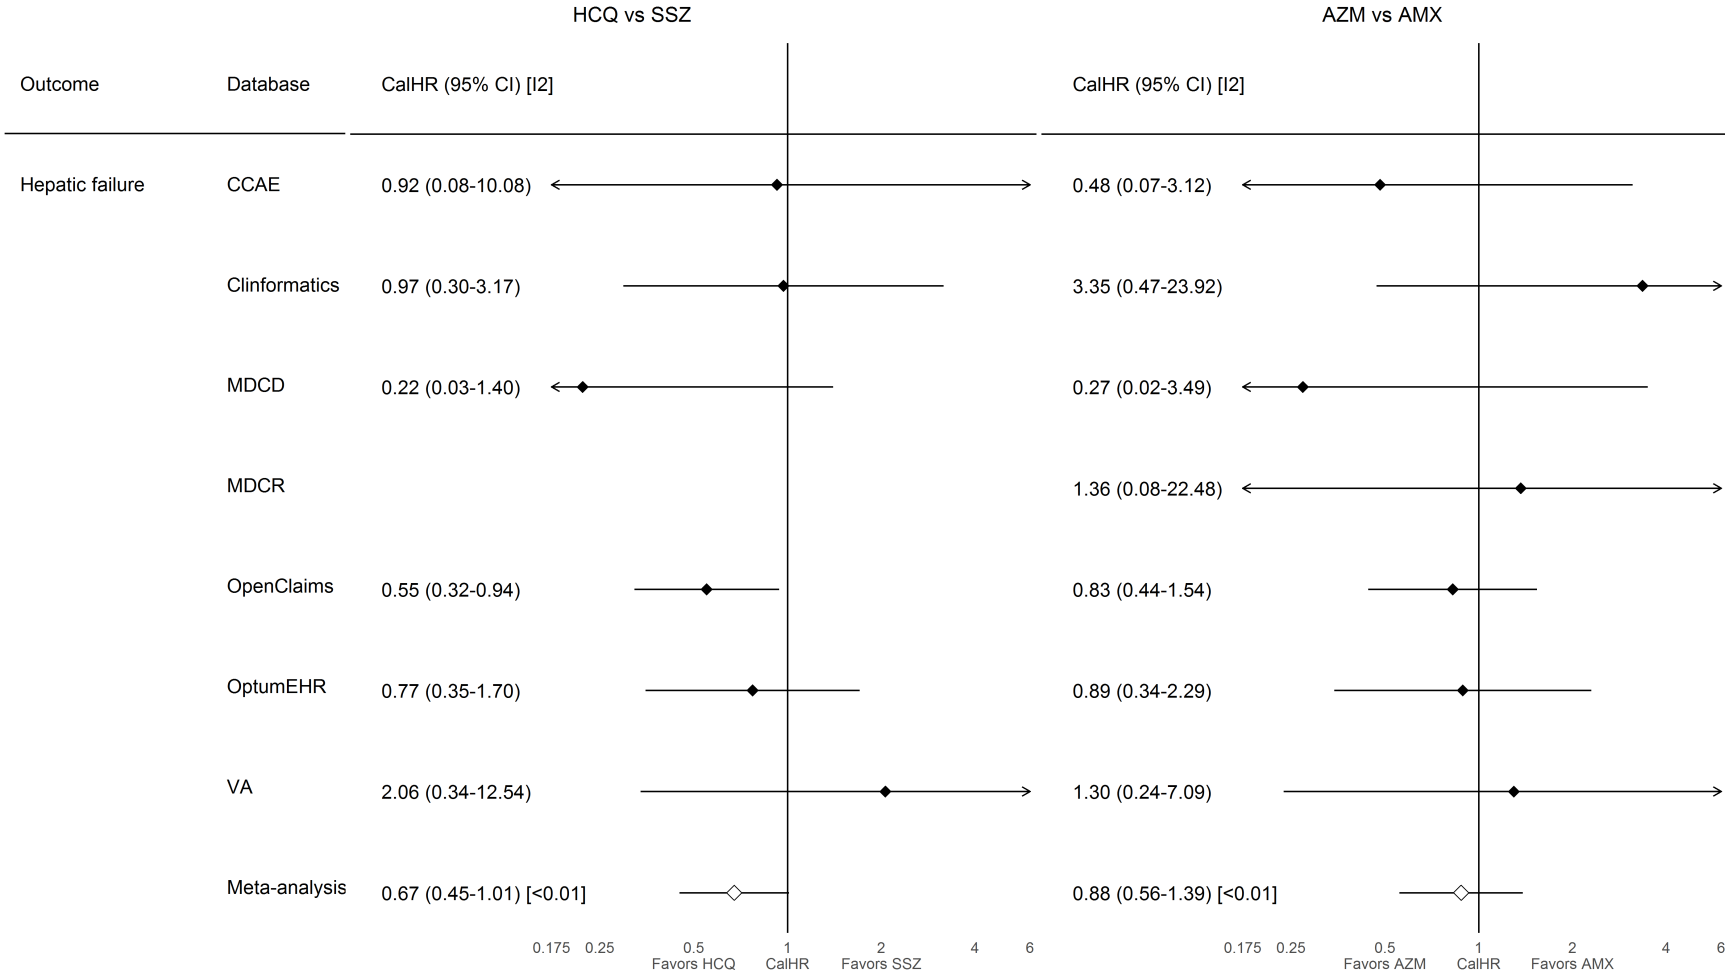

S8.1.16. Acute pancreatitis

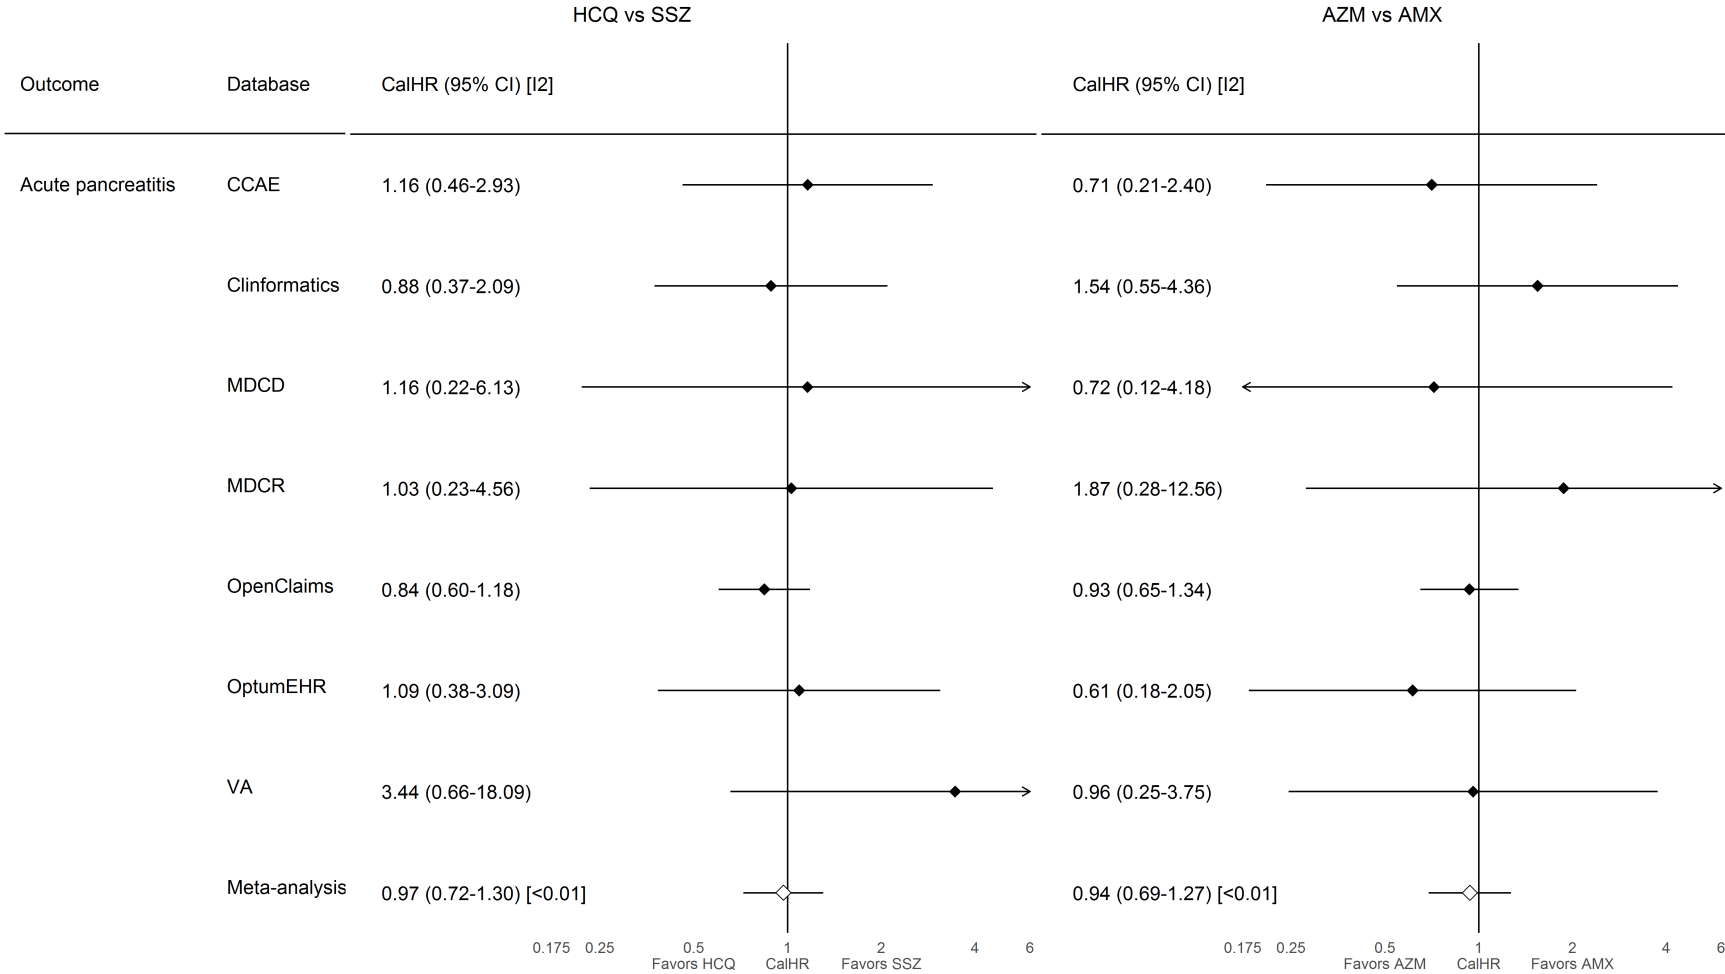

**S8.2. On-treatment follow-up**

**S8.2.1. All-cause mortality**

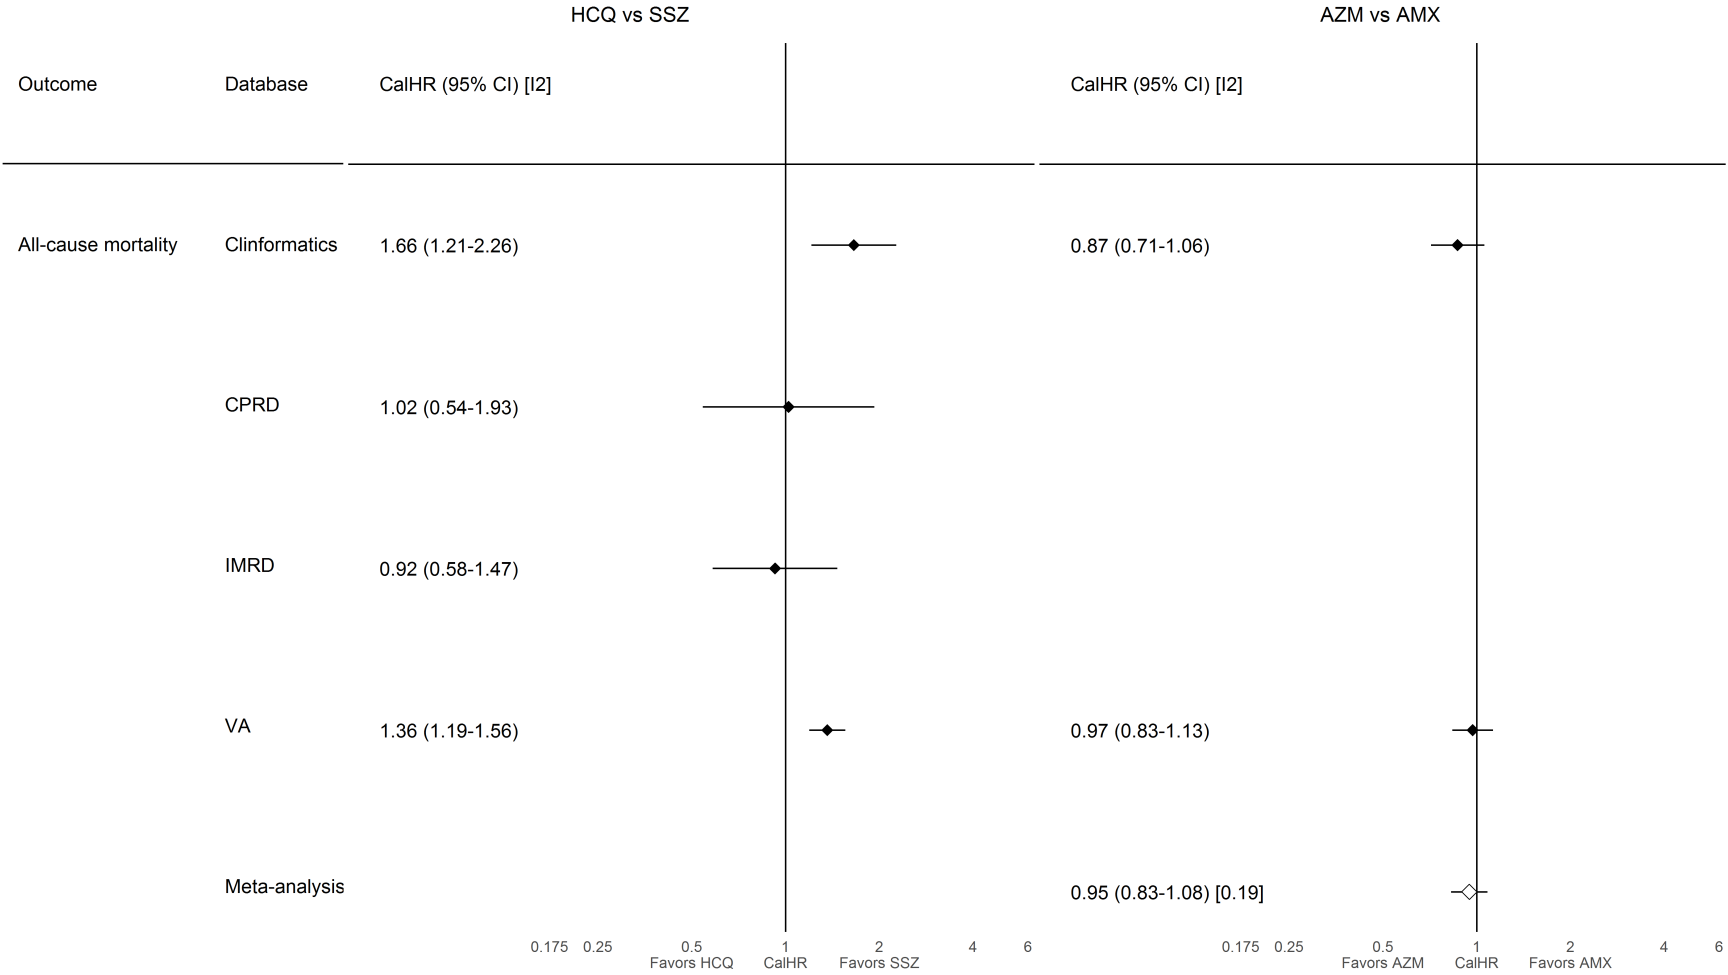

**S8.2.2. CV-related mortality**

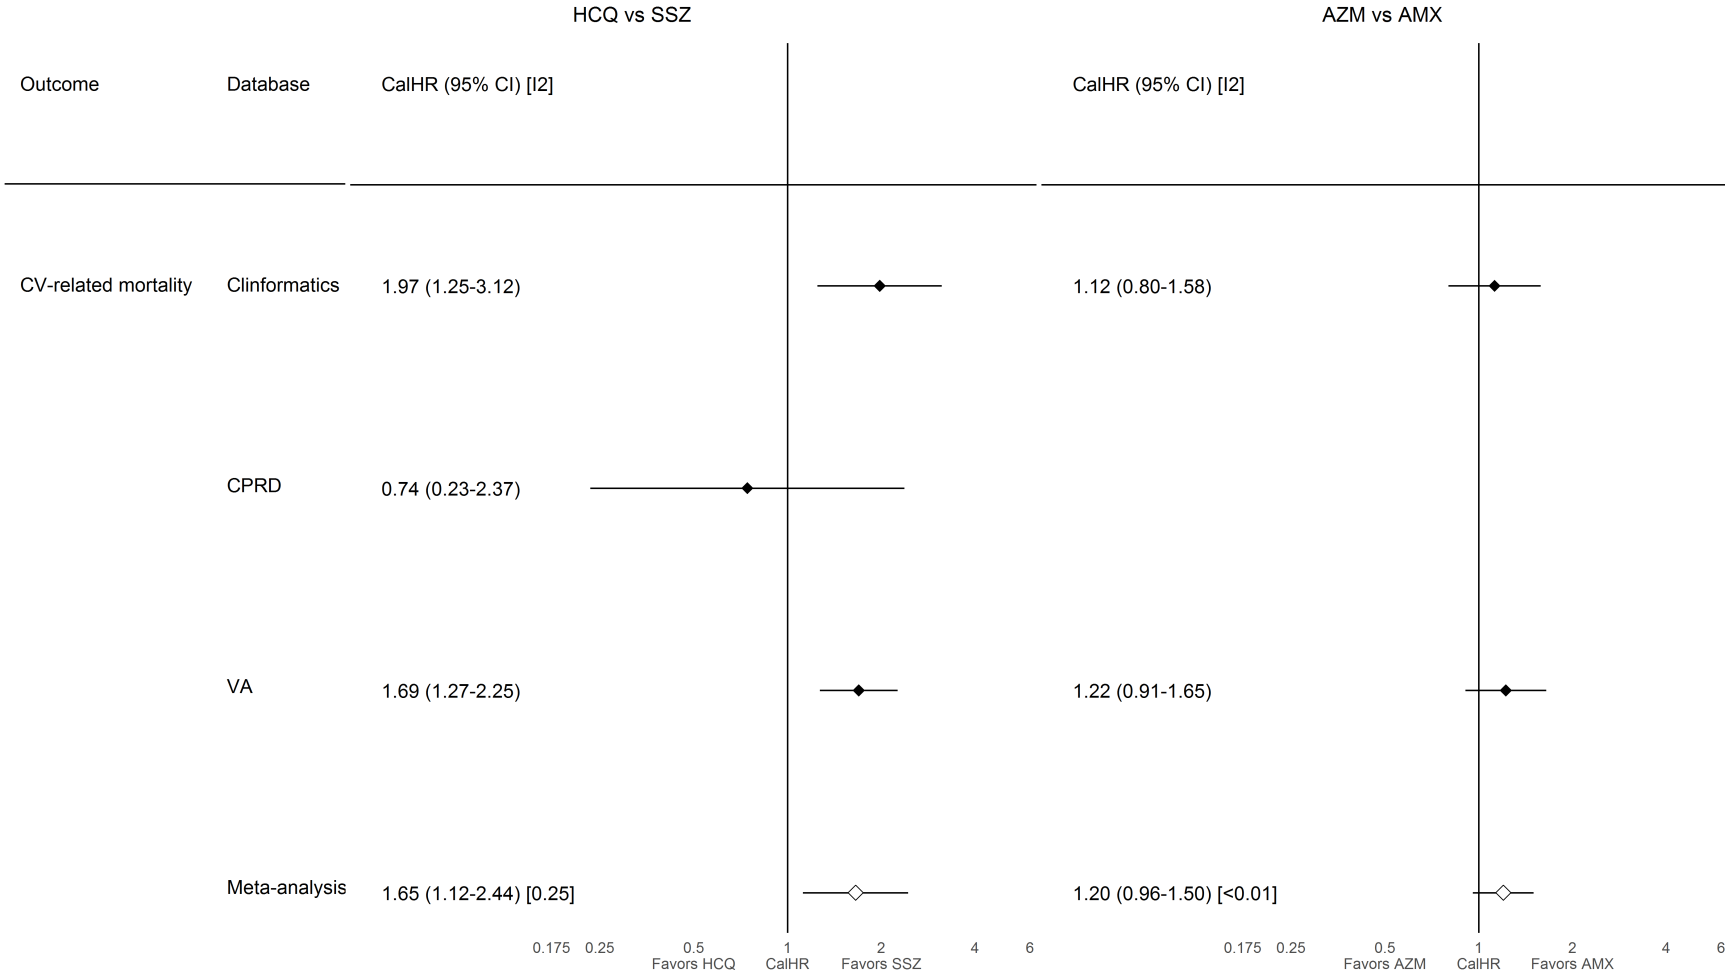

**S8.2.3. Myocardial infarction**

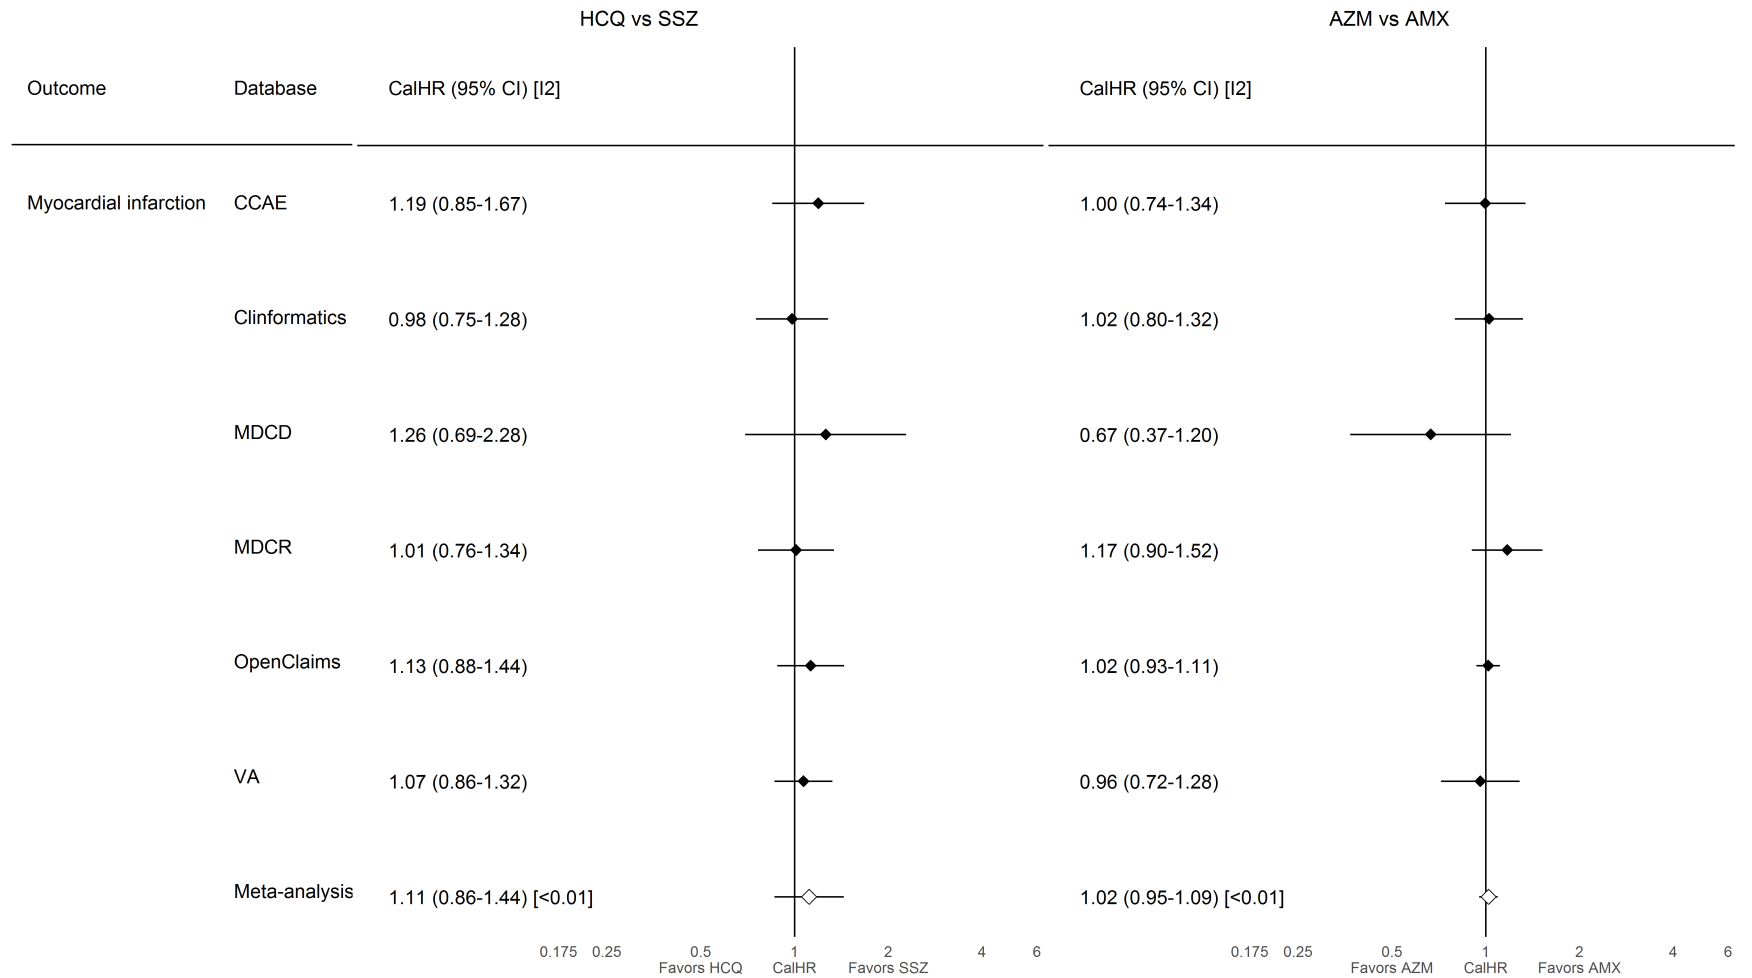

S8.2.4. Chest pain or angina

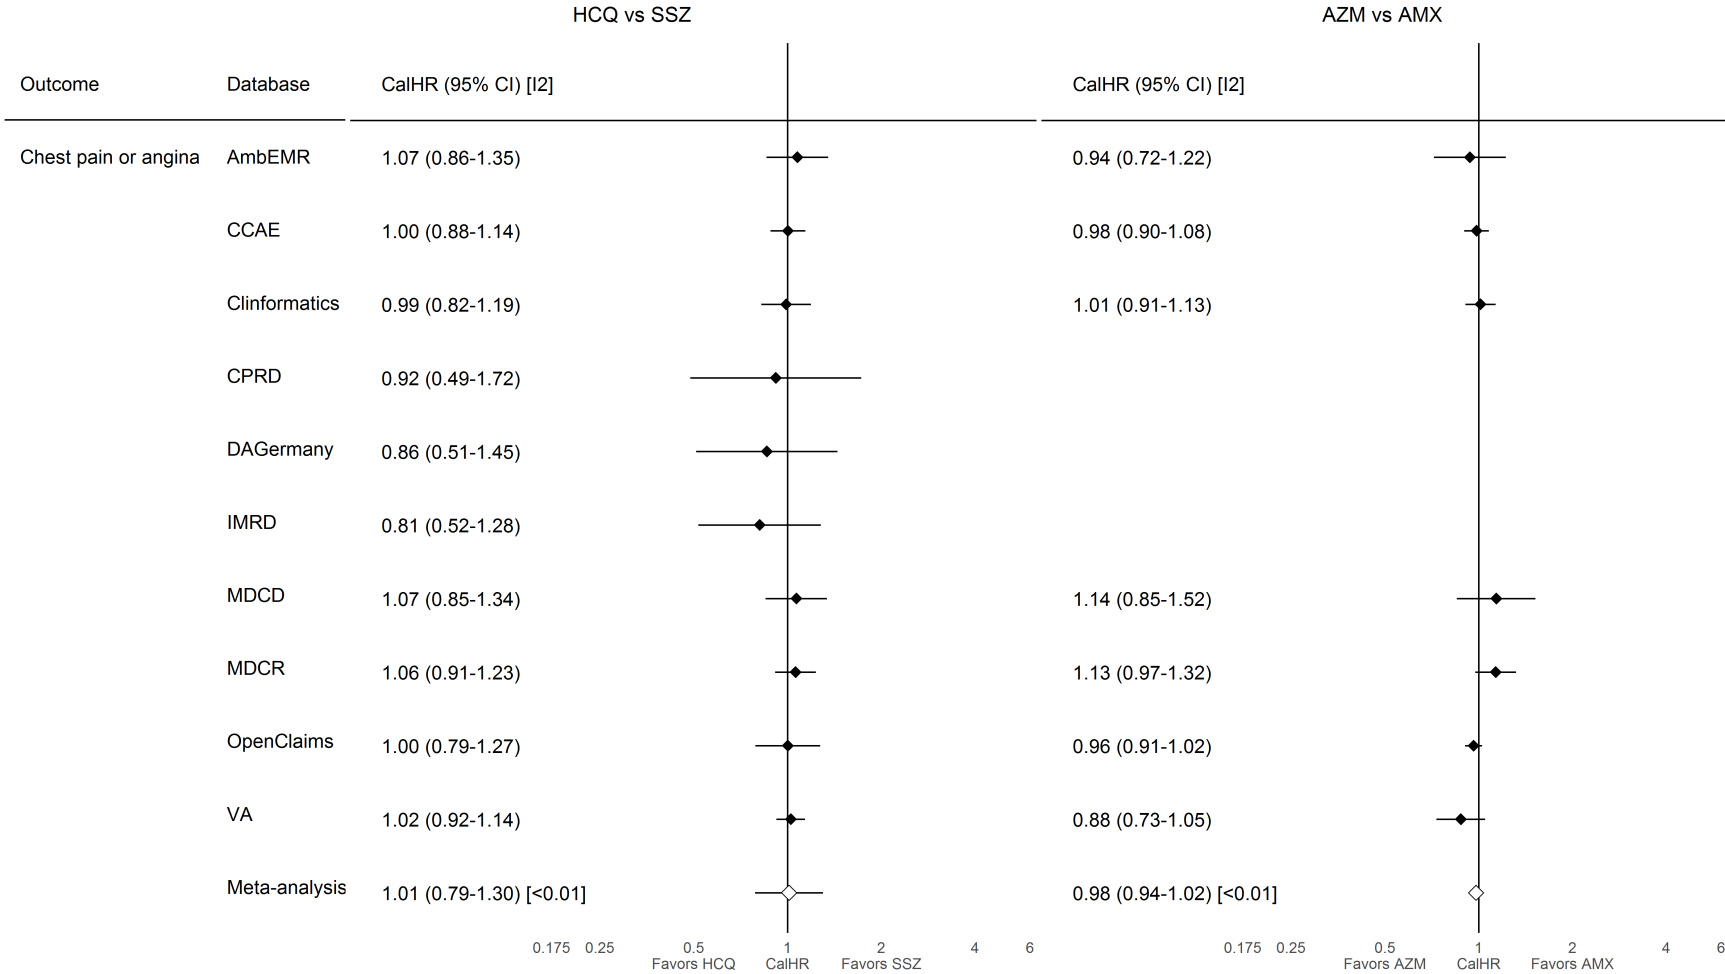



S8.2.5. Heart failure

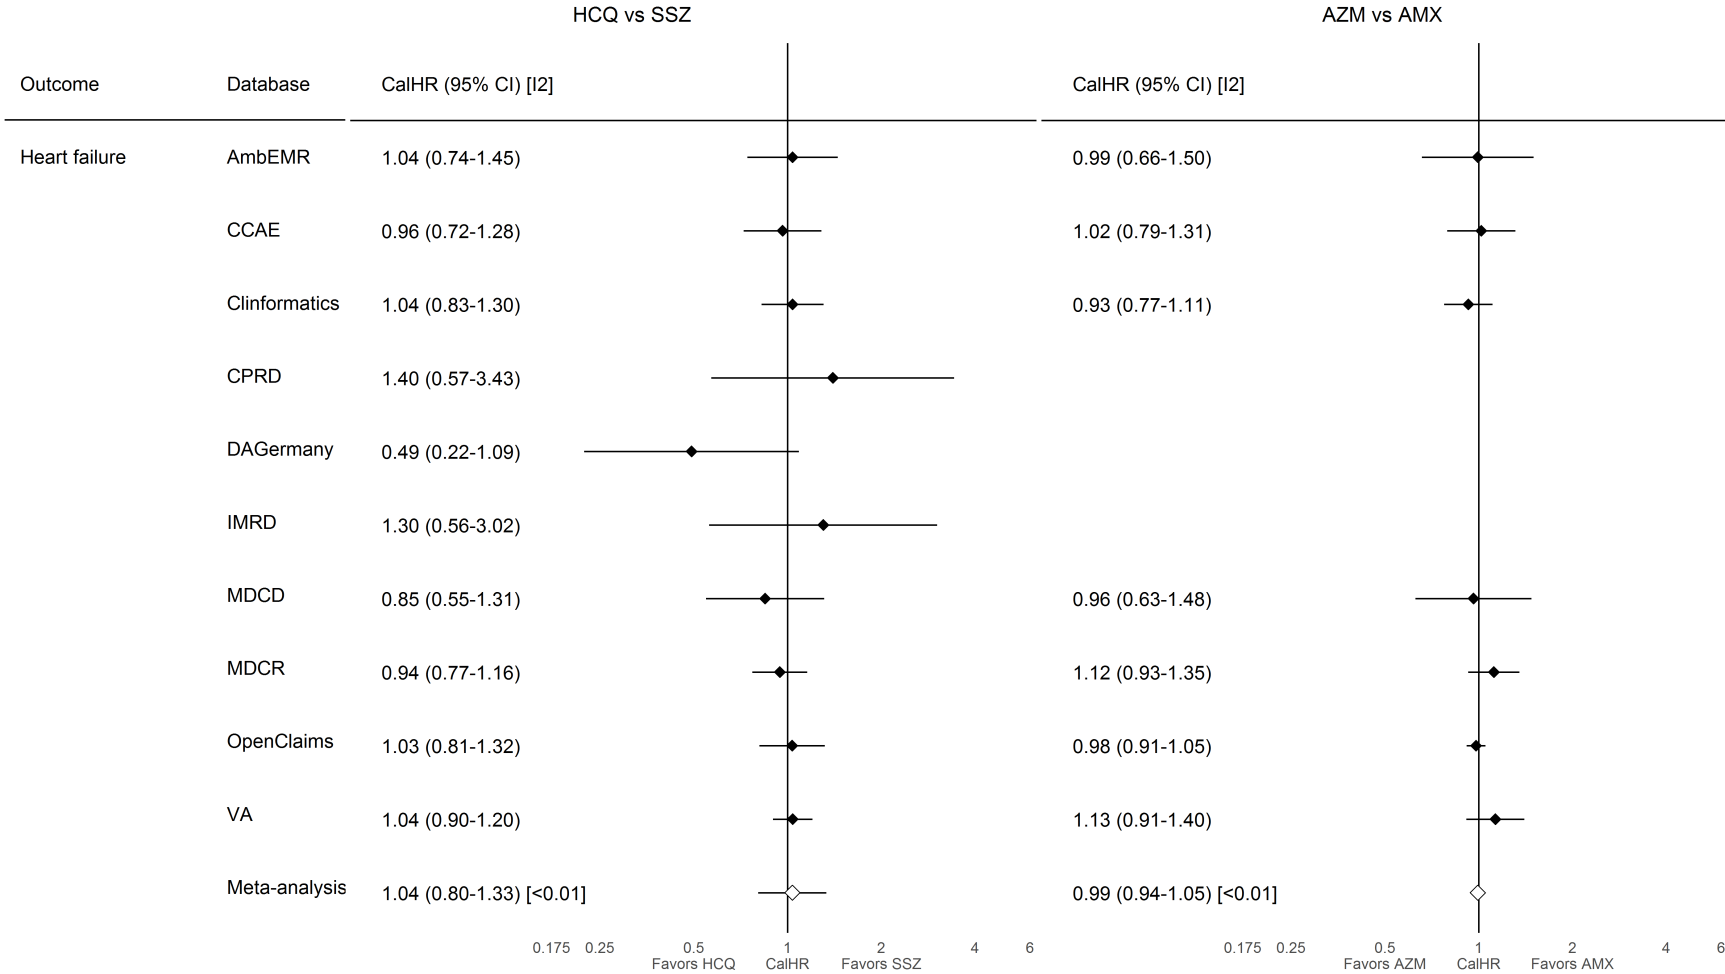

S8.2.6. Cardiovascular events

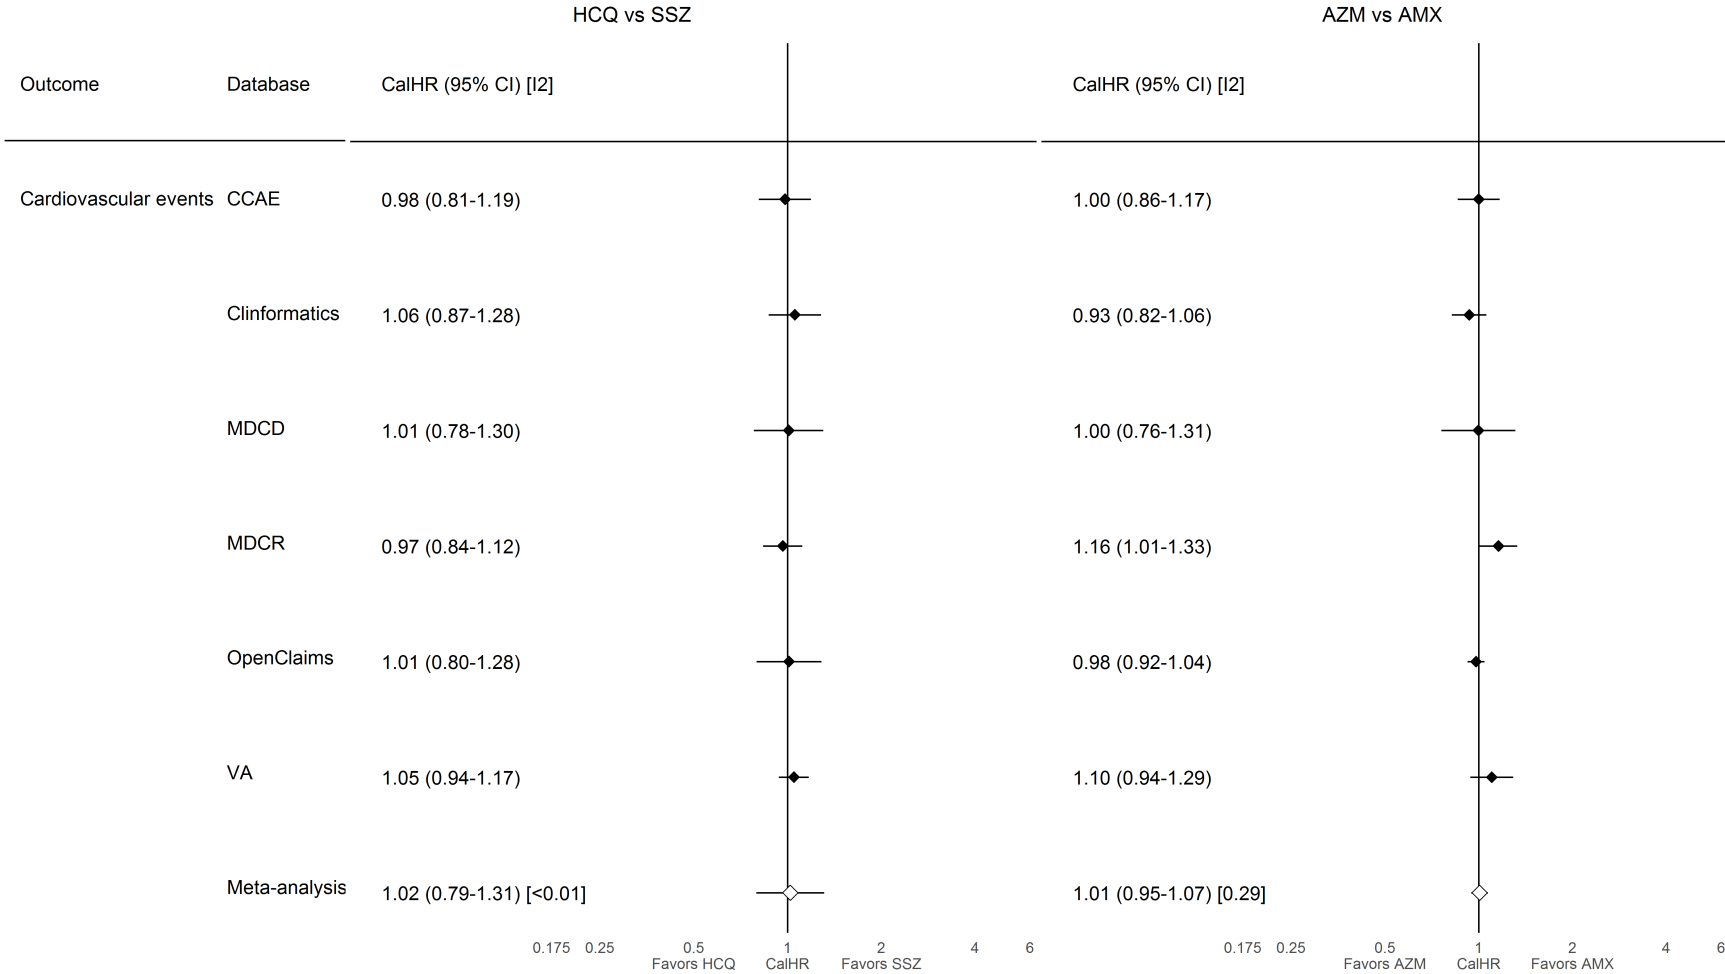

**S8.2.7. Cardiac arrhythmia**

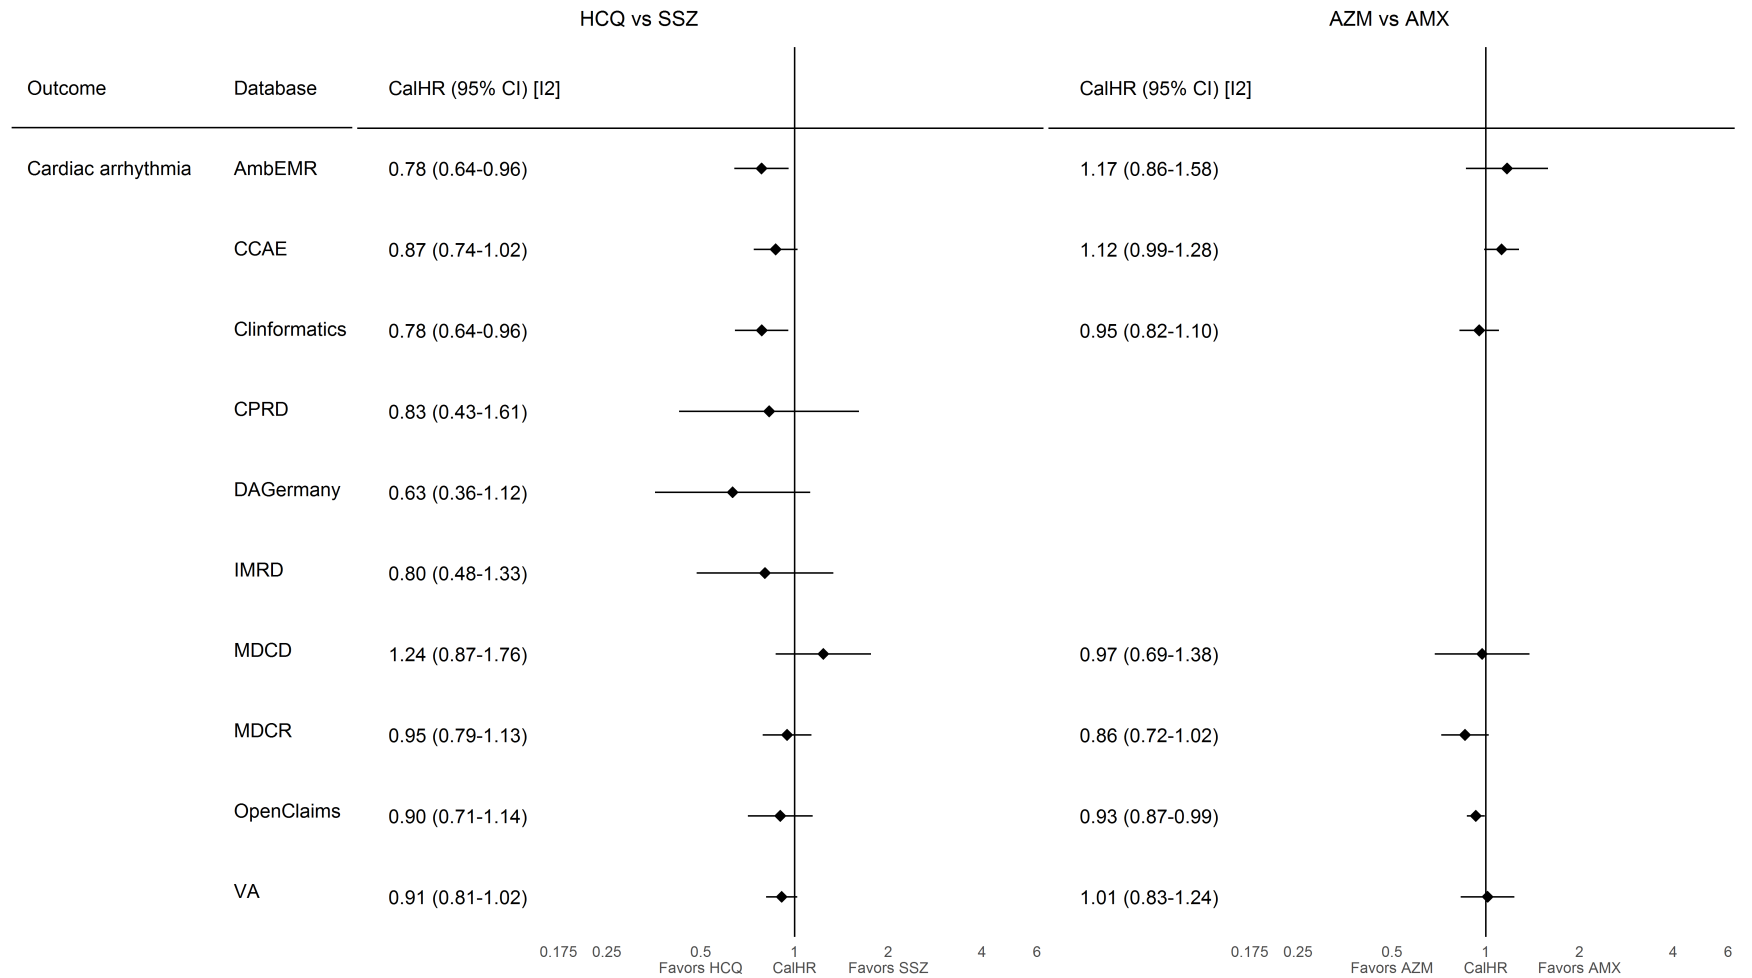

S8.2.8. Bradycardia

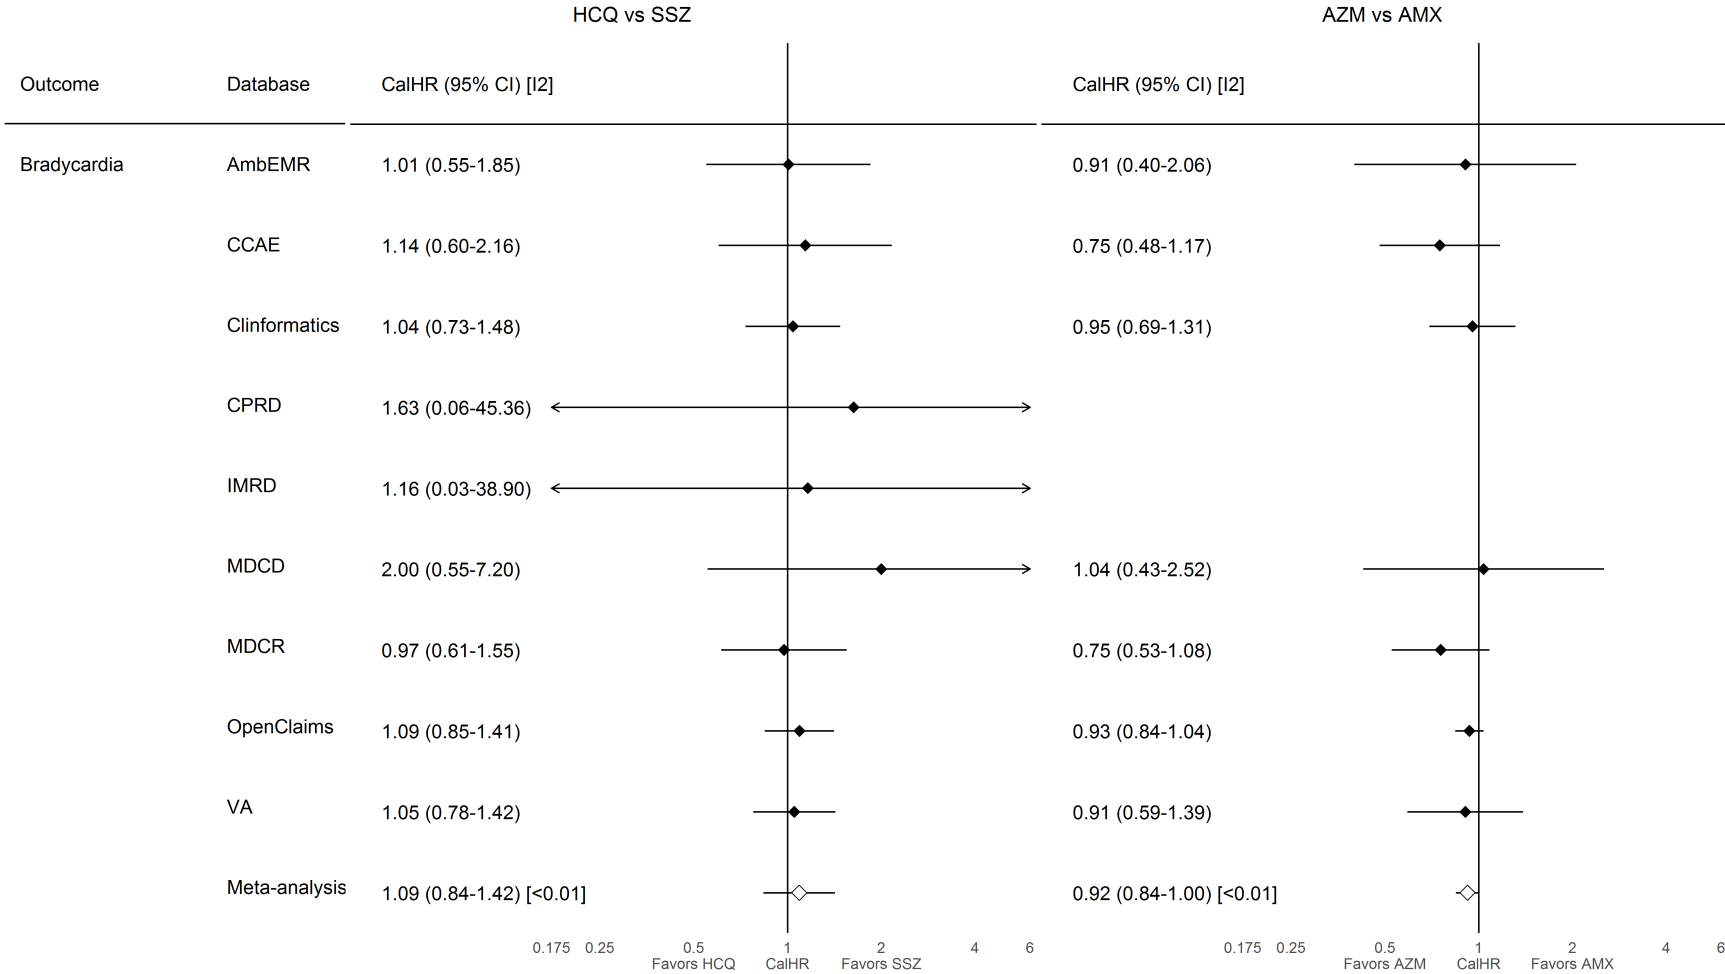

S8.2.9. Transient ischemic attack

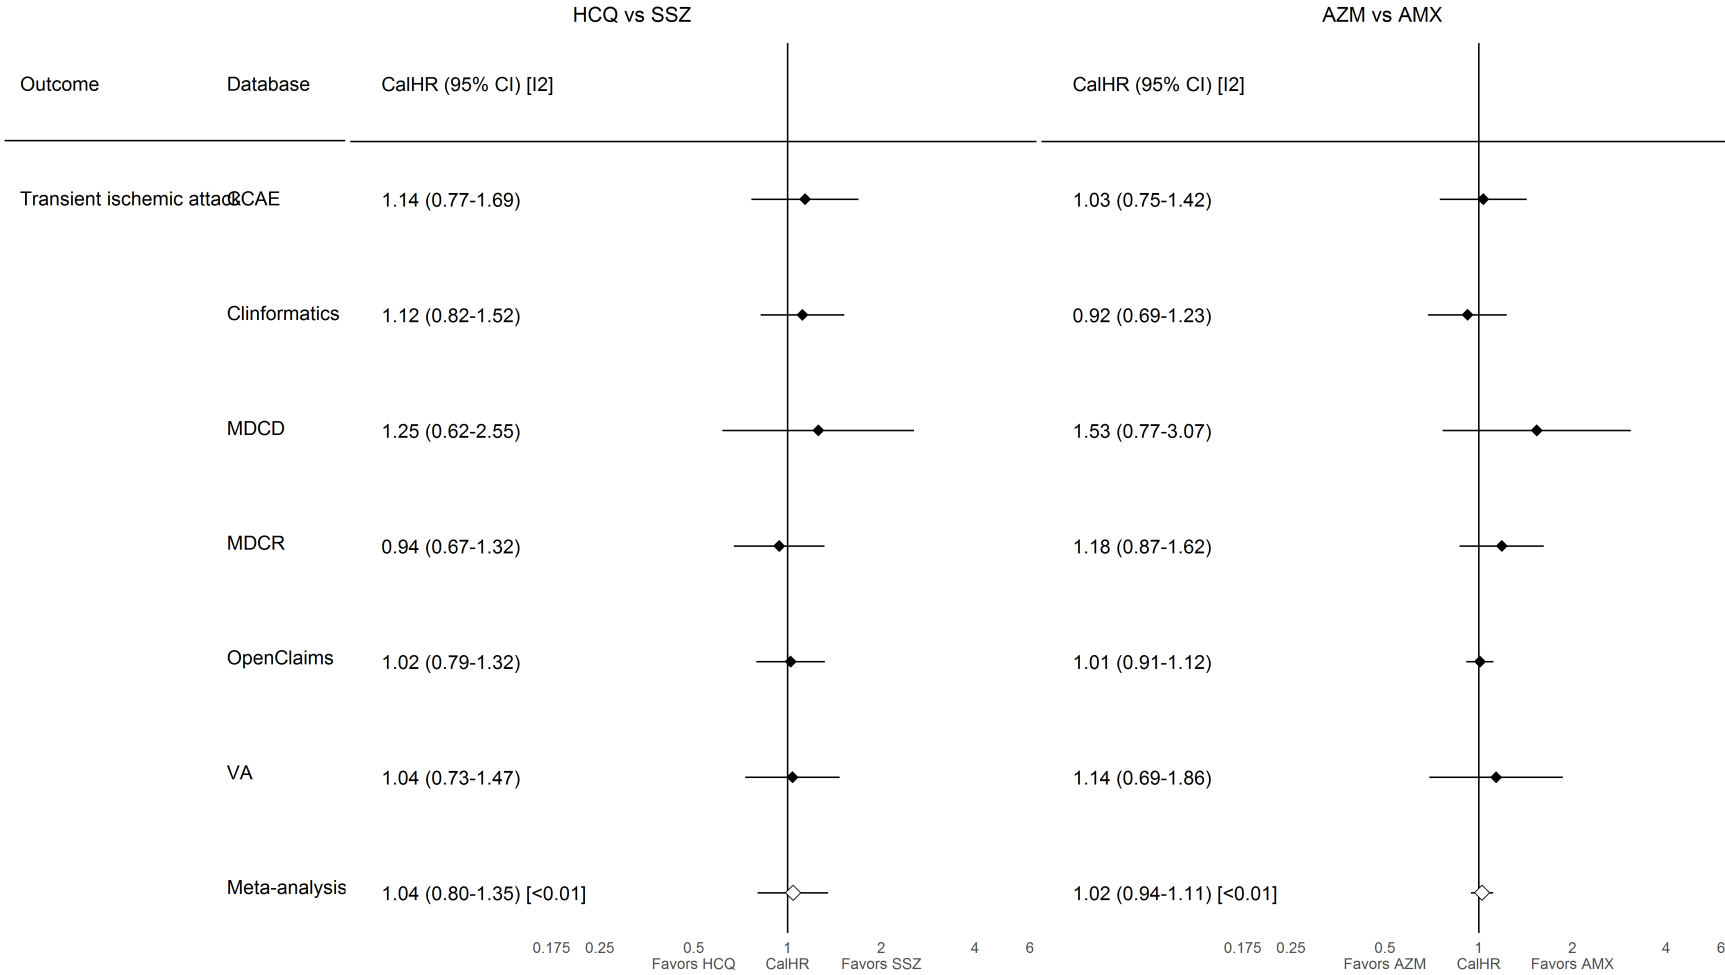

S8.2.10. Stroke

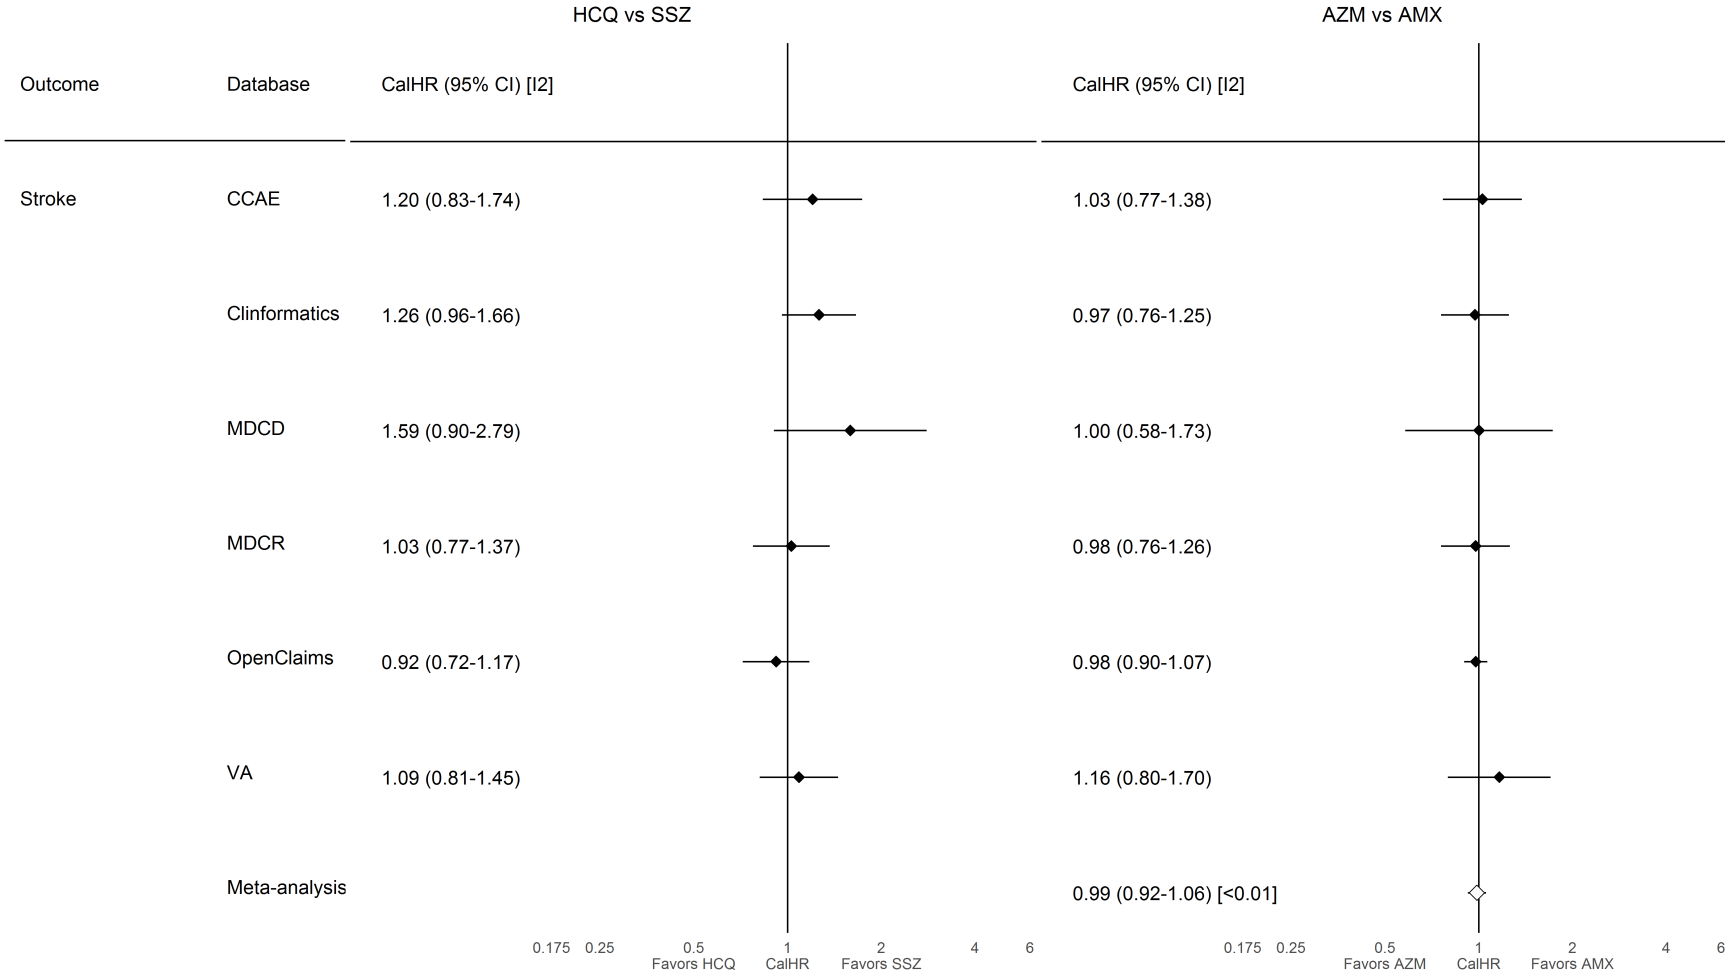

S8.2.11. Venous thromboembolism

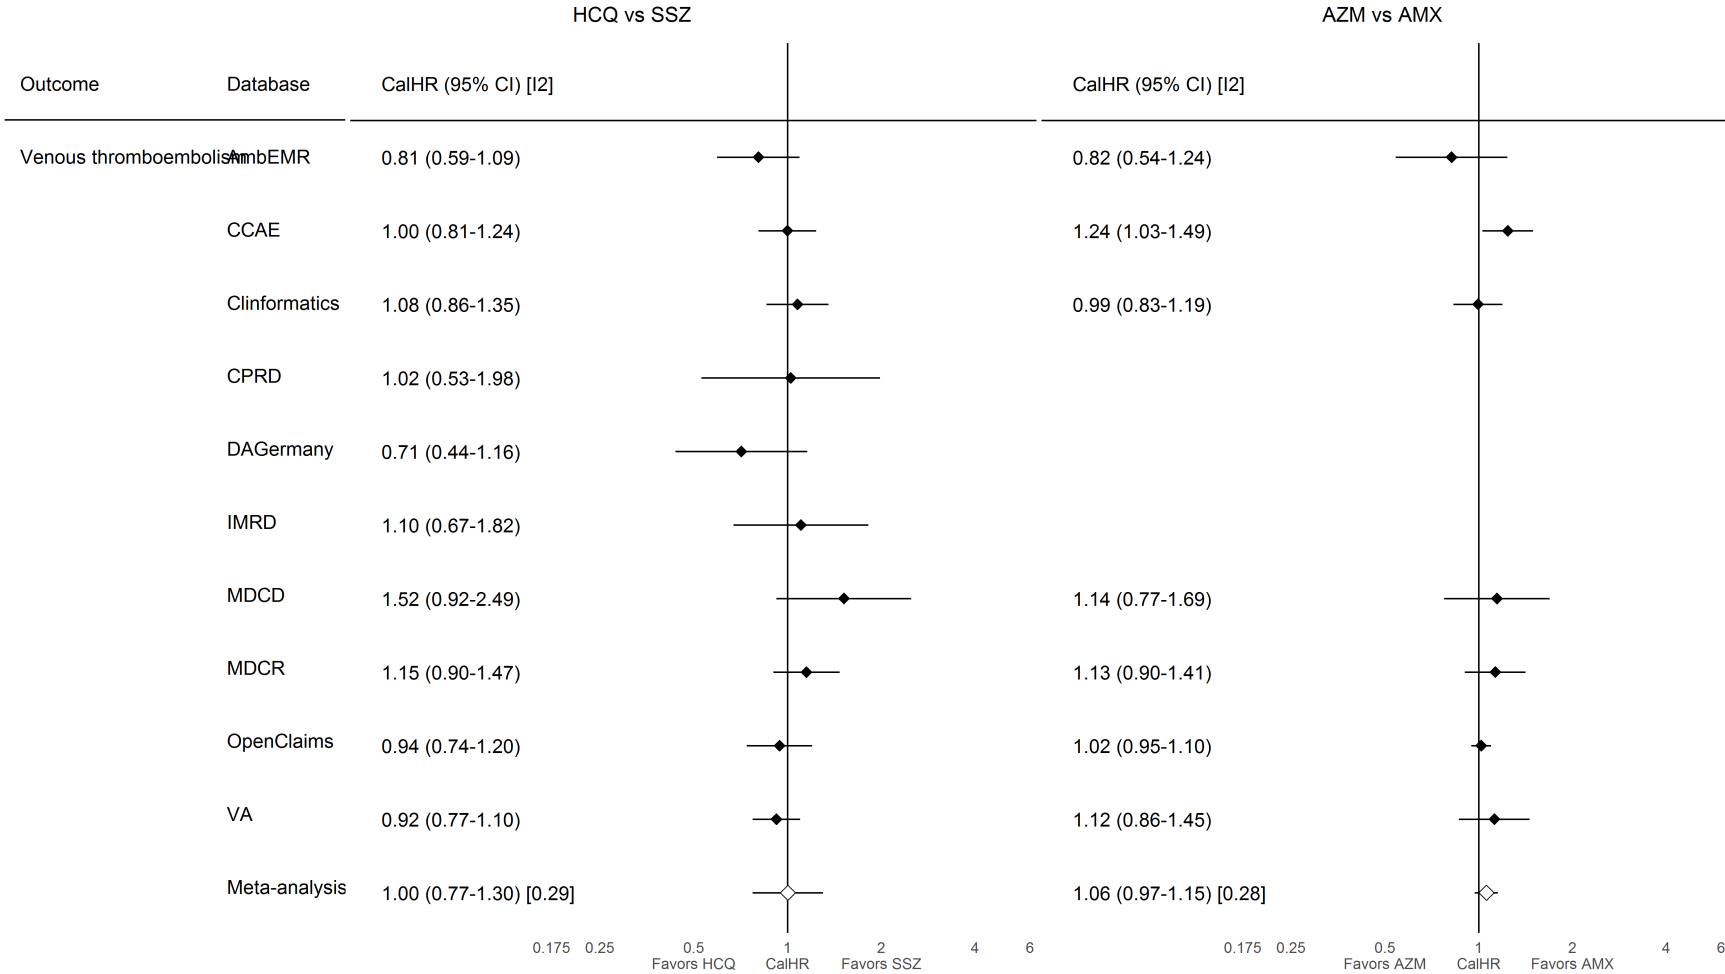

S8.2.12. Gastrointestinal bleeding

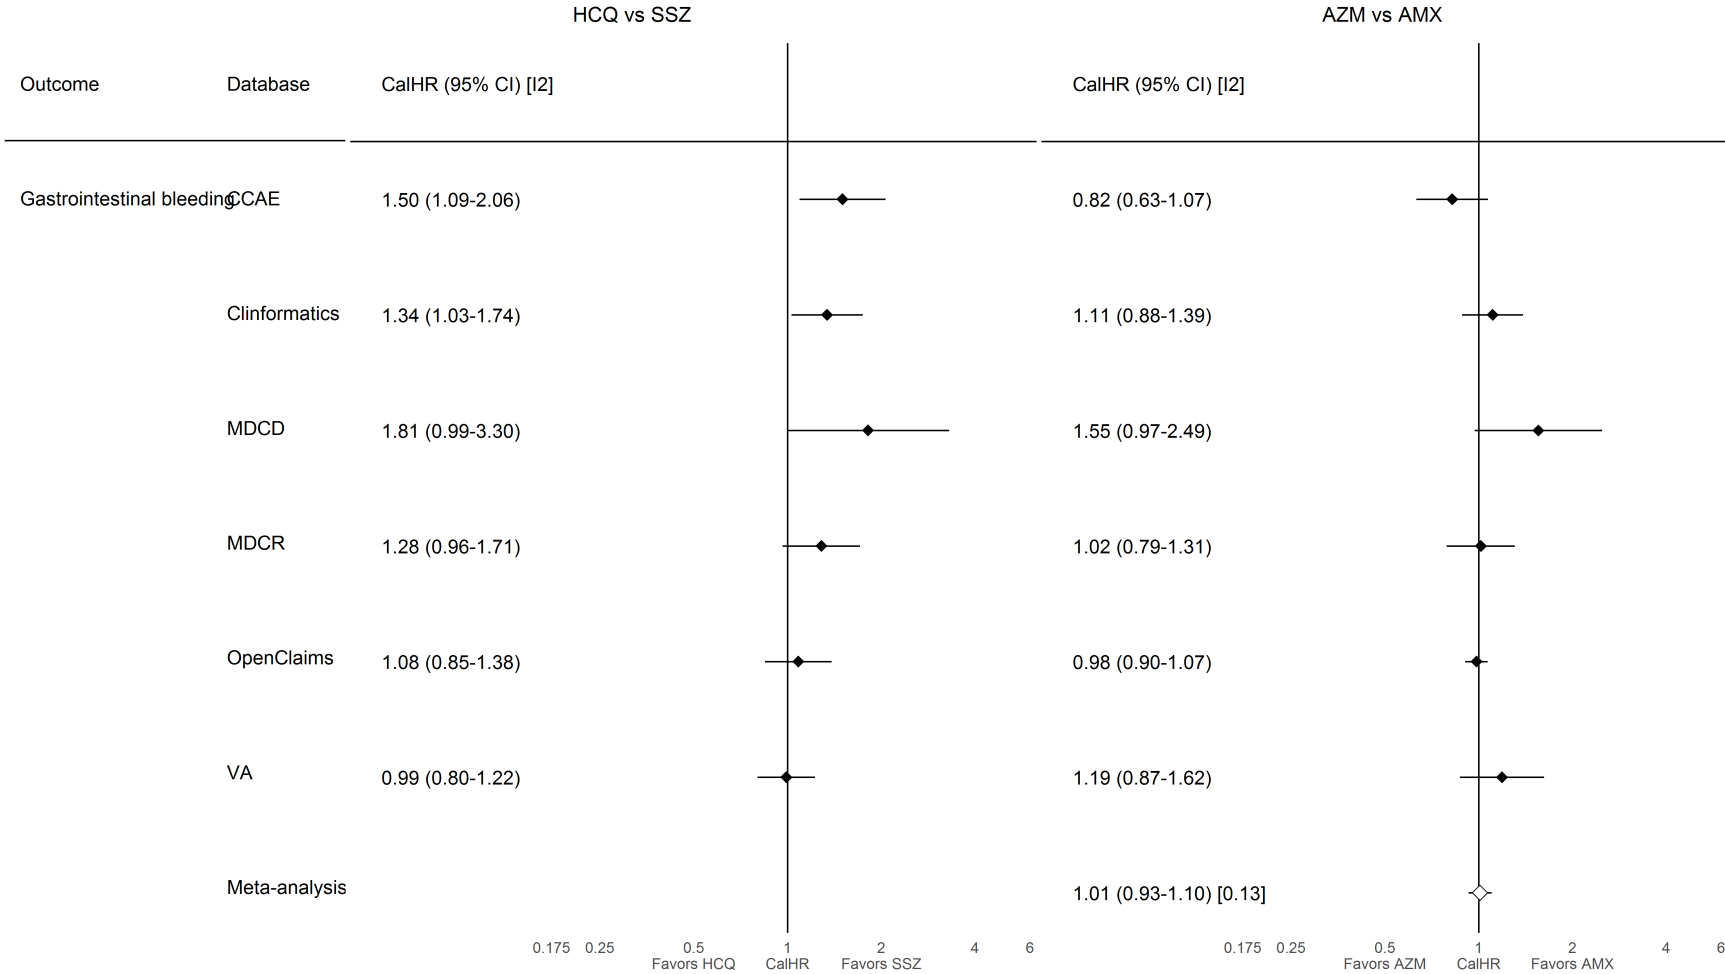



**S8.2.13. Acute renal failure**

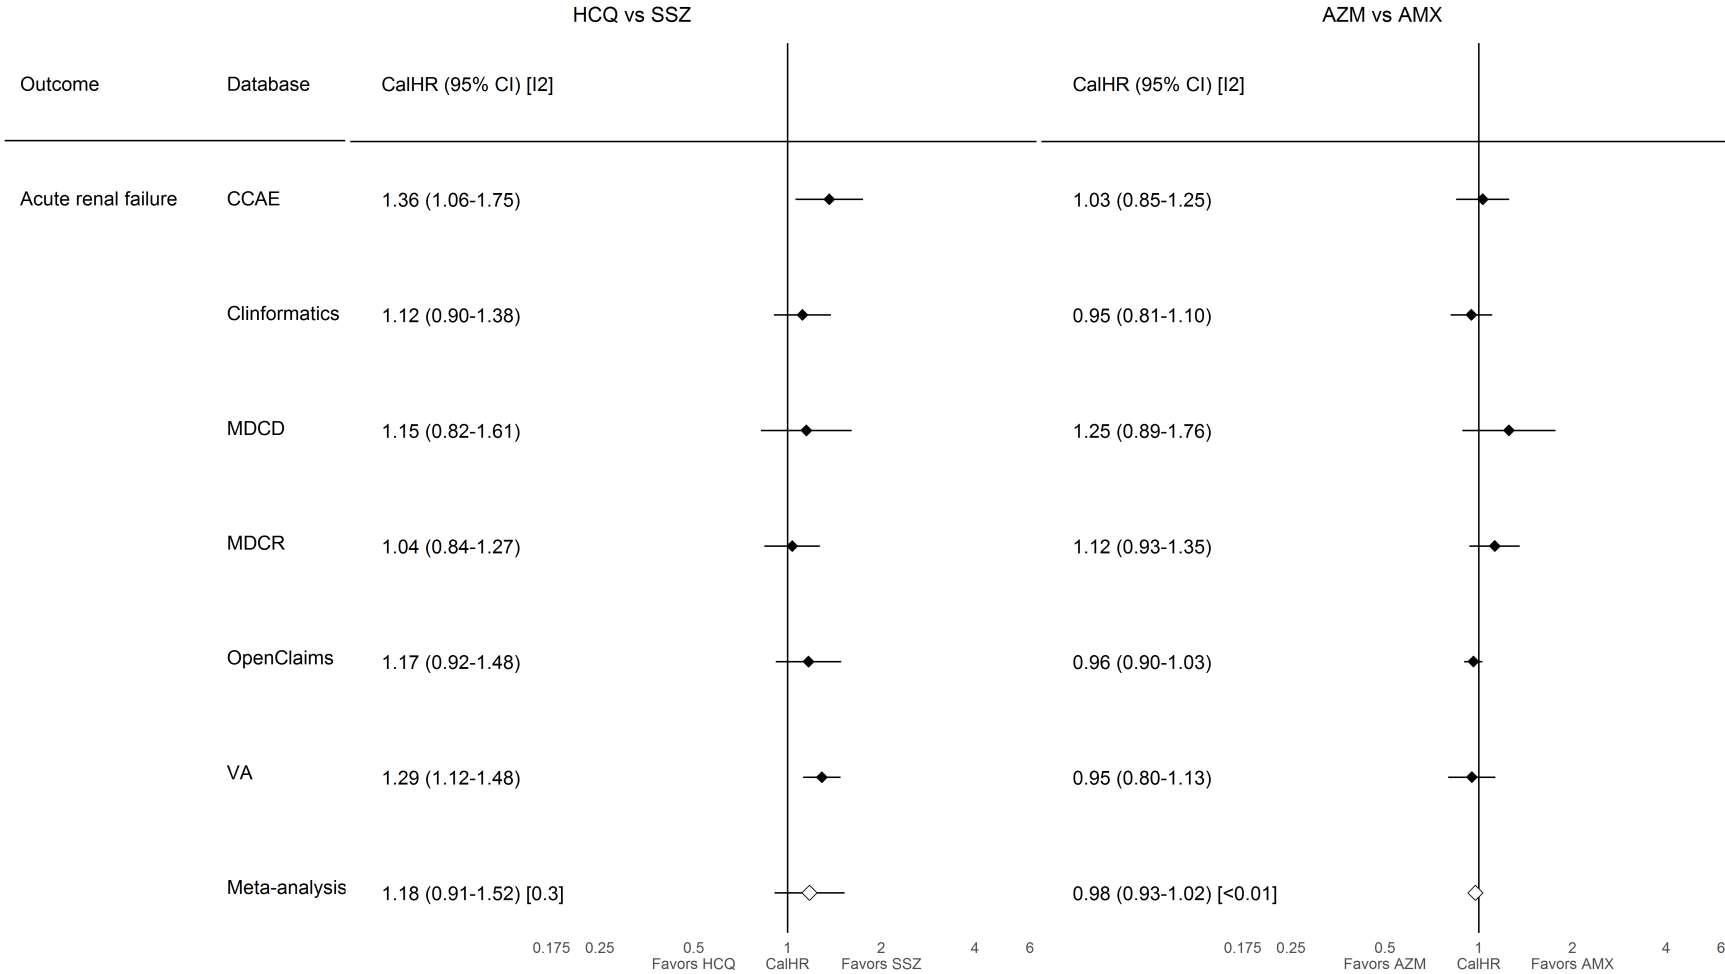

S8.2.14. End stage renal disease

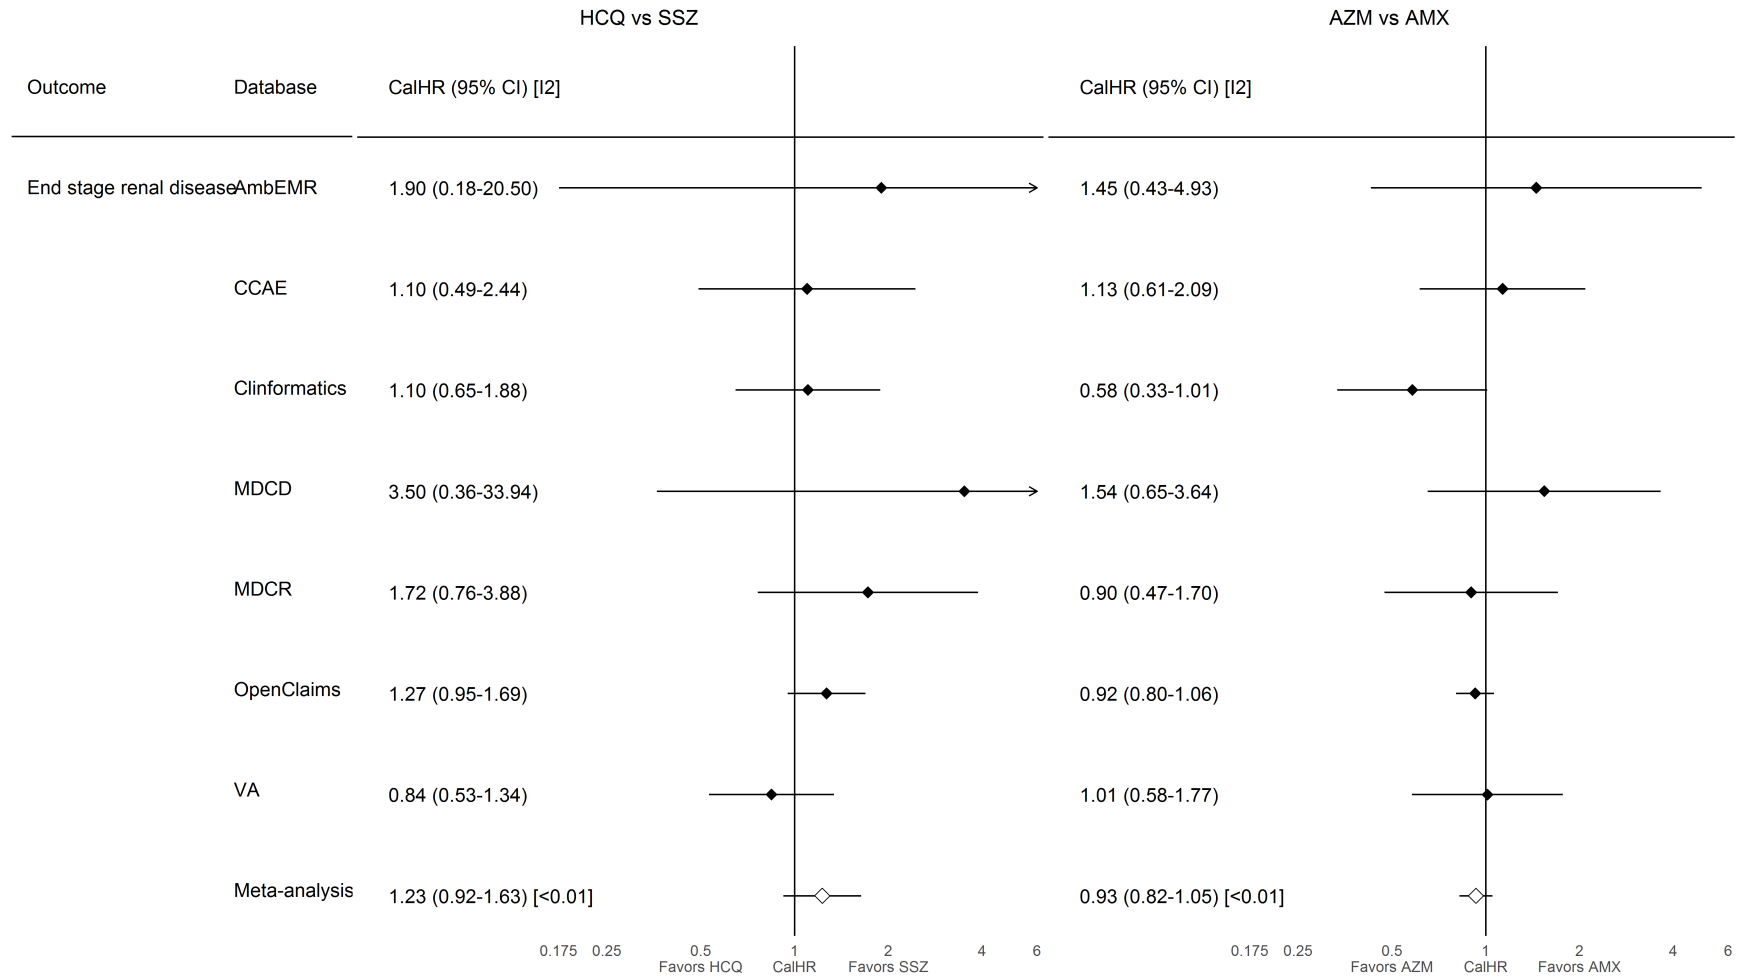

S8.2.15. Hepatic failure

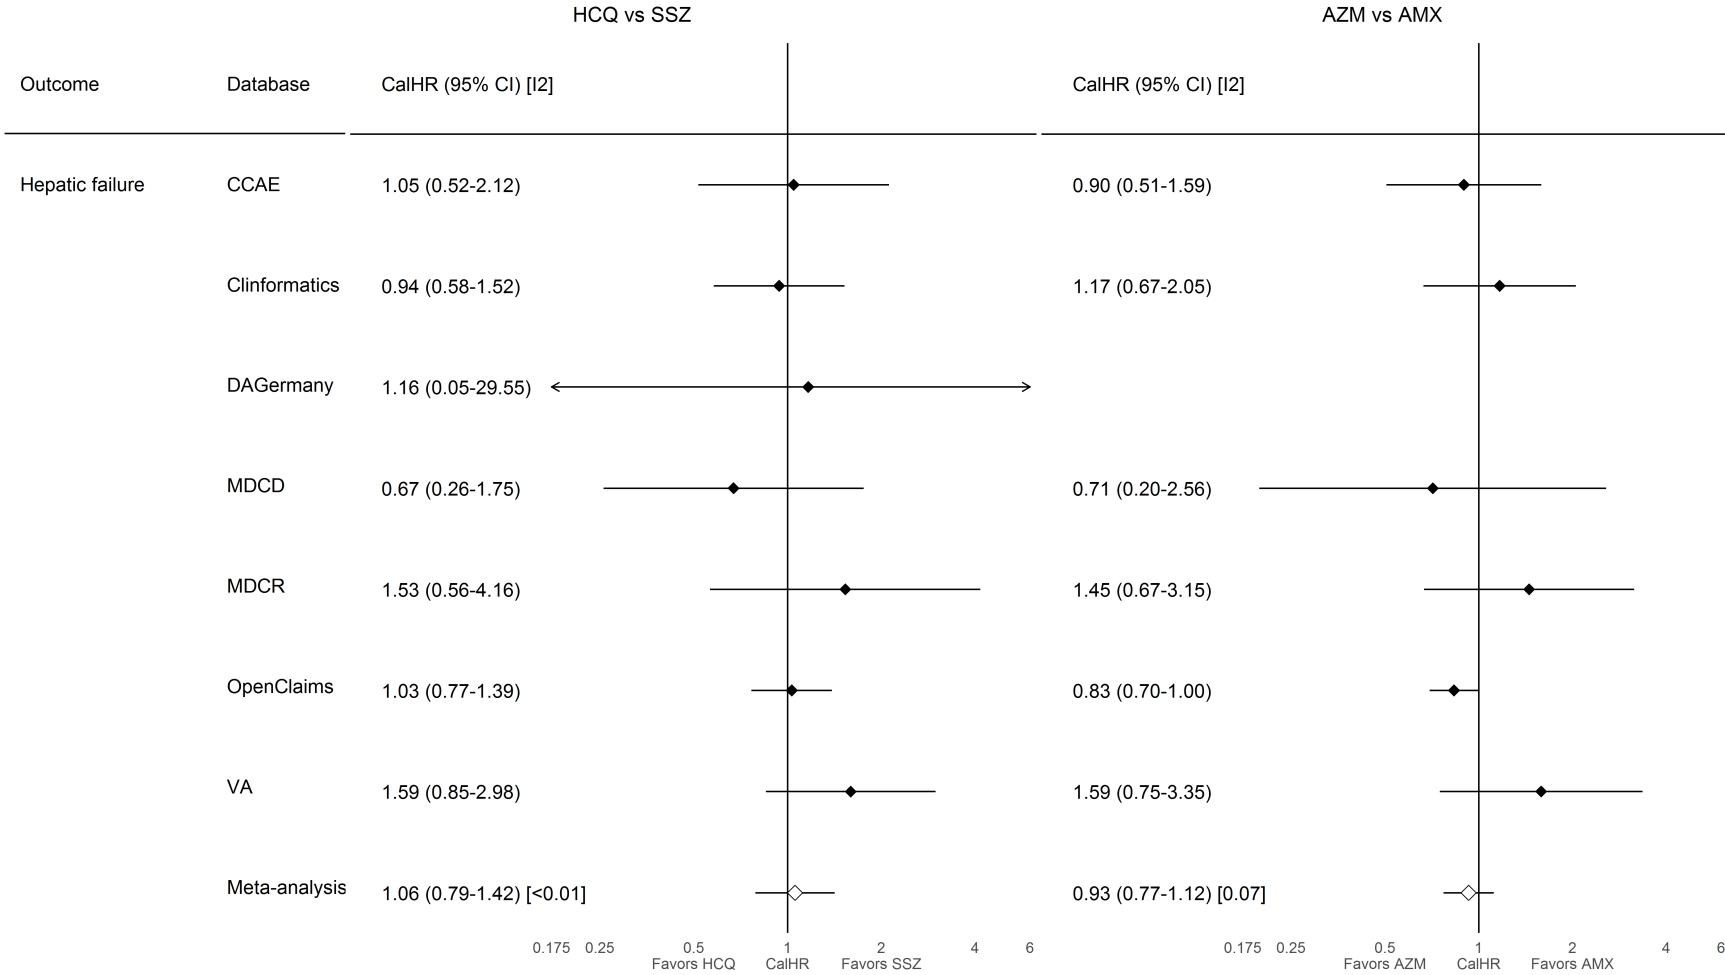

S8.2.16. Acute pancreatitis

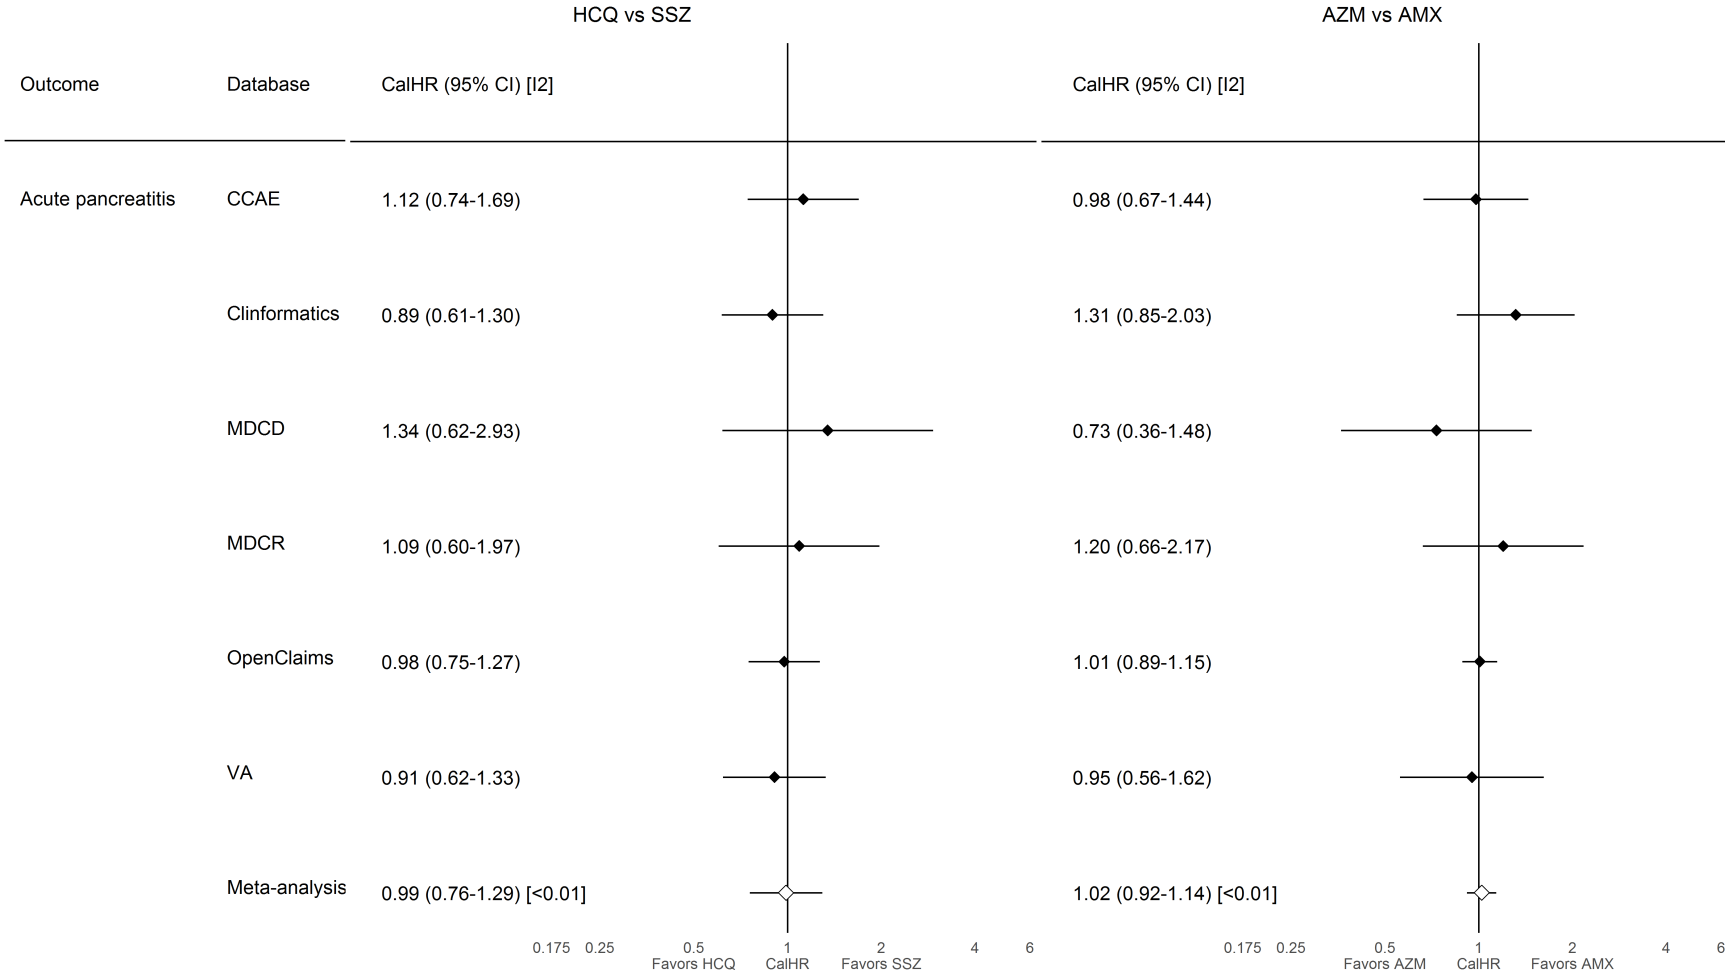

**S9. Evidence evaluation diagnostics**

Preference score overlap, covariate balance, and empirical calibration plots are reported below. The preference score is a transformation of the propensity score that adjusts for differences in the sizes of the two exposure cohorts in a pairwise comparison. A higher overlap indicates patients in the two cohorts were more similar in terms of their predicted probability of receiving one exposure relative to the other. In the covariate balance plots, each dot represents the standardized difference of means for a single covariate before and after propensity score stratification. The empirical calibration plots show effect estimates for the negative controls where the true hazard ratio is expected to equal 1. Estimates below the diagonal dashed lines are statistically significantly different ( $\alpha = 0.05$ ) from the true effect size. A well-calibrated estimator should produce the true effect sizes within the 95 percent confidence interval 95 percent of the time. Negative control estimates are not reported if fewer than 5 events are observed. *On-treatment* time-at-risk was unavailable in the PanTher databases so no negative control effects were estimated. In DAGermany and JMDC, the hydroxychloroquine+azithromycin and hydroxychloroquine+amoxicillin cohorts were of insufficient sample size for the cross-validation procedure for hyperparameter selection in the regularized regression used for fitting propensity scores, so diagnostics were not reported.

S9.1. AmbEMR

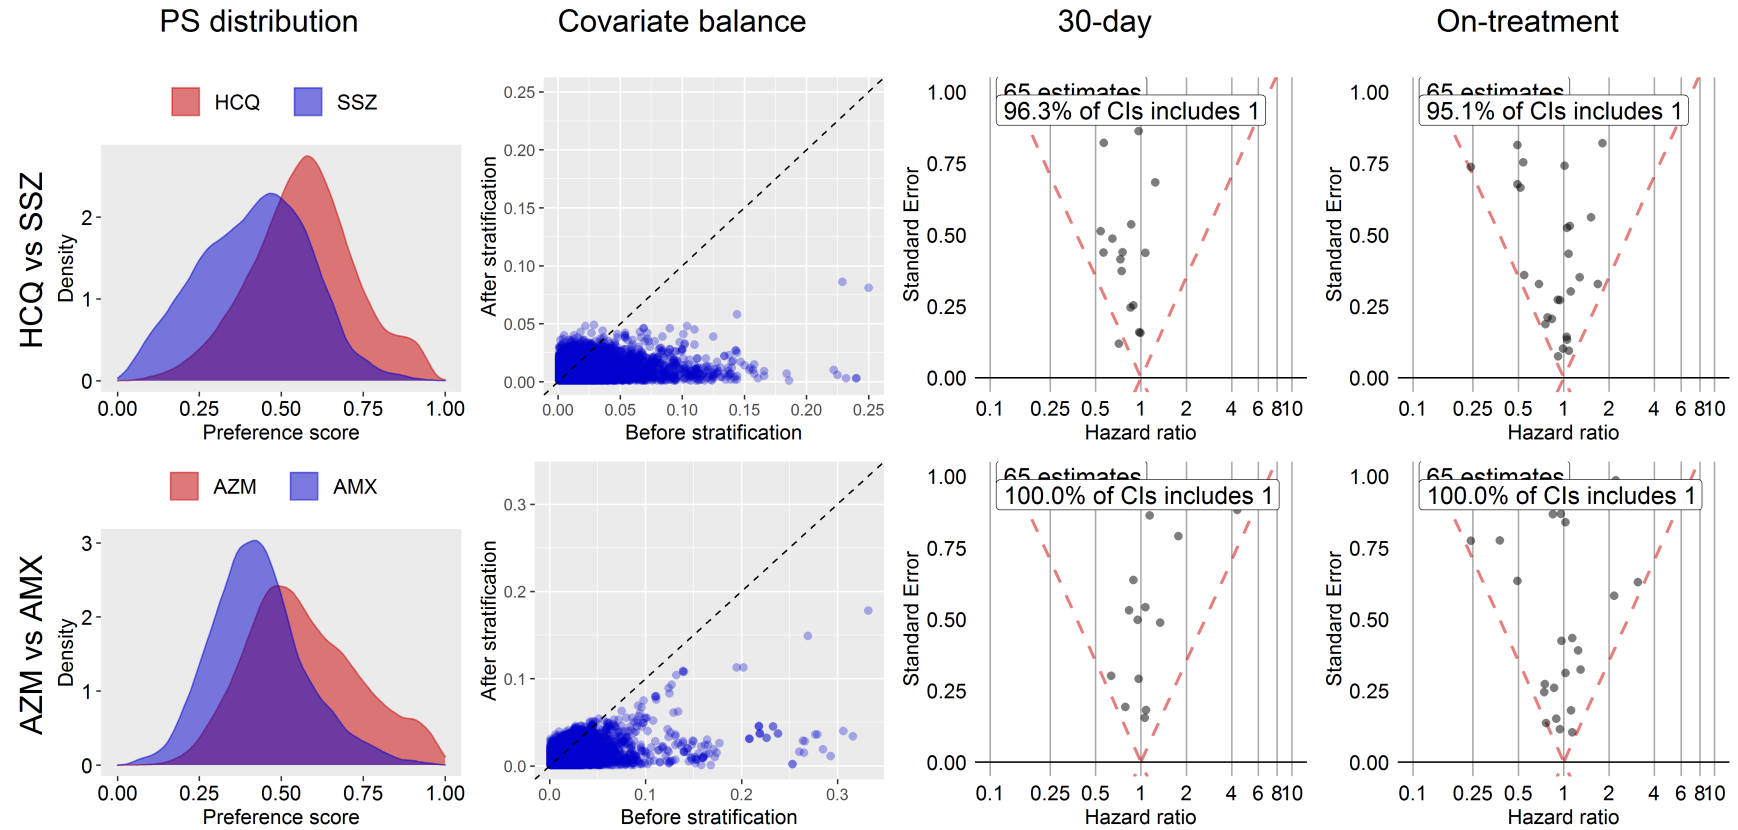

S9.2. CCAE

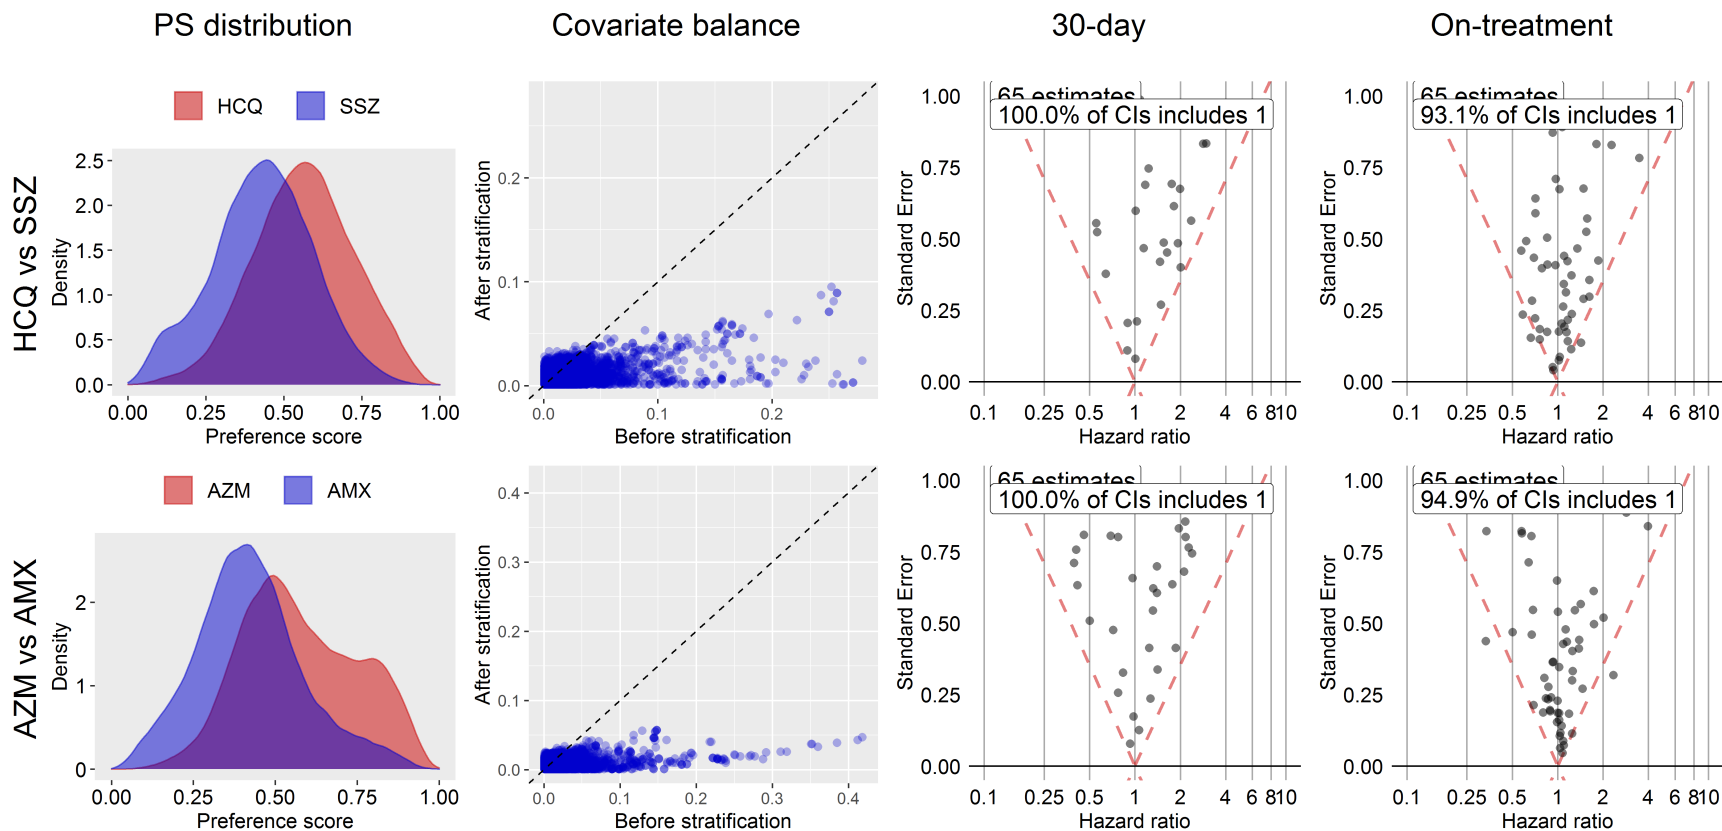

S9.3. Clinformatics

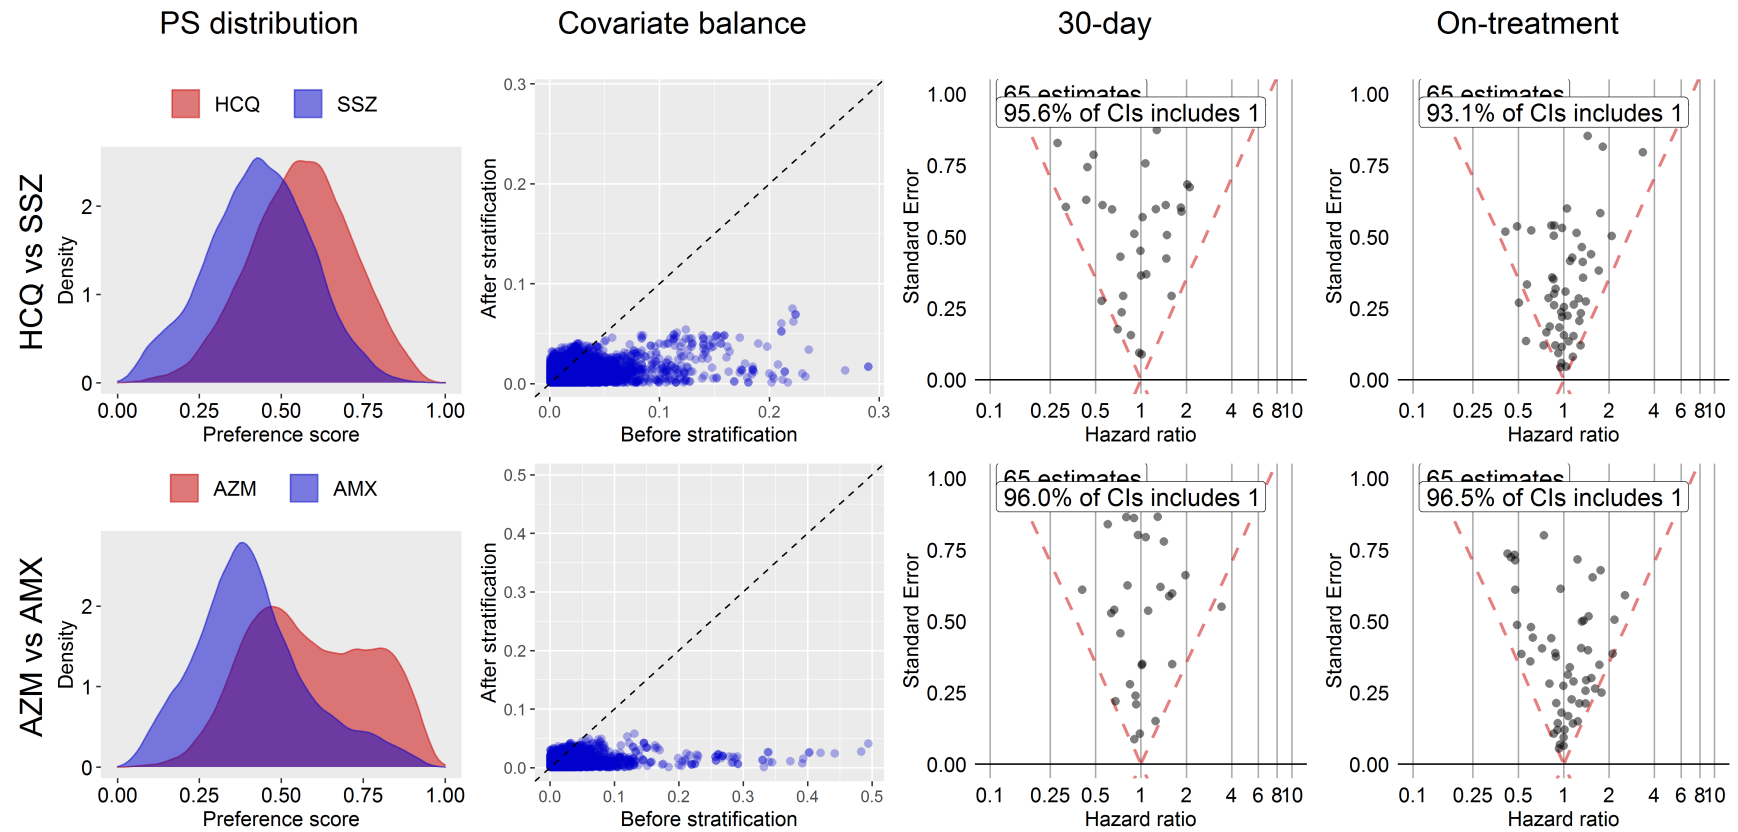



S9.4. CPRD

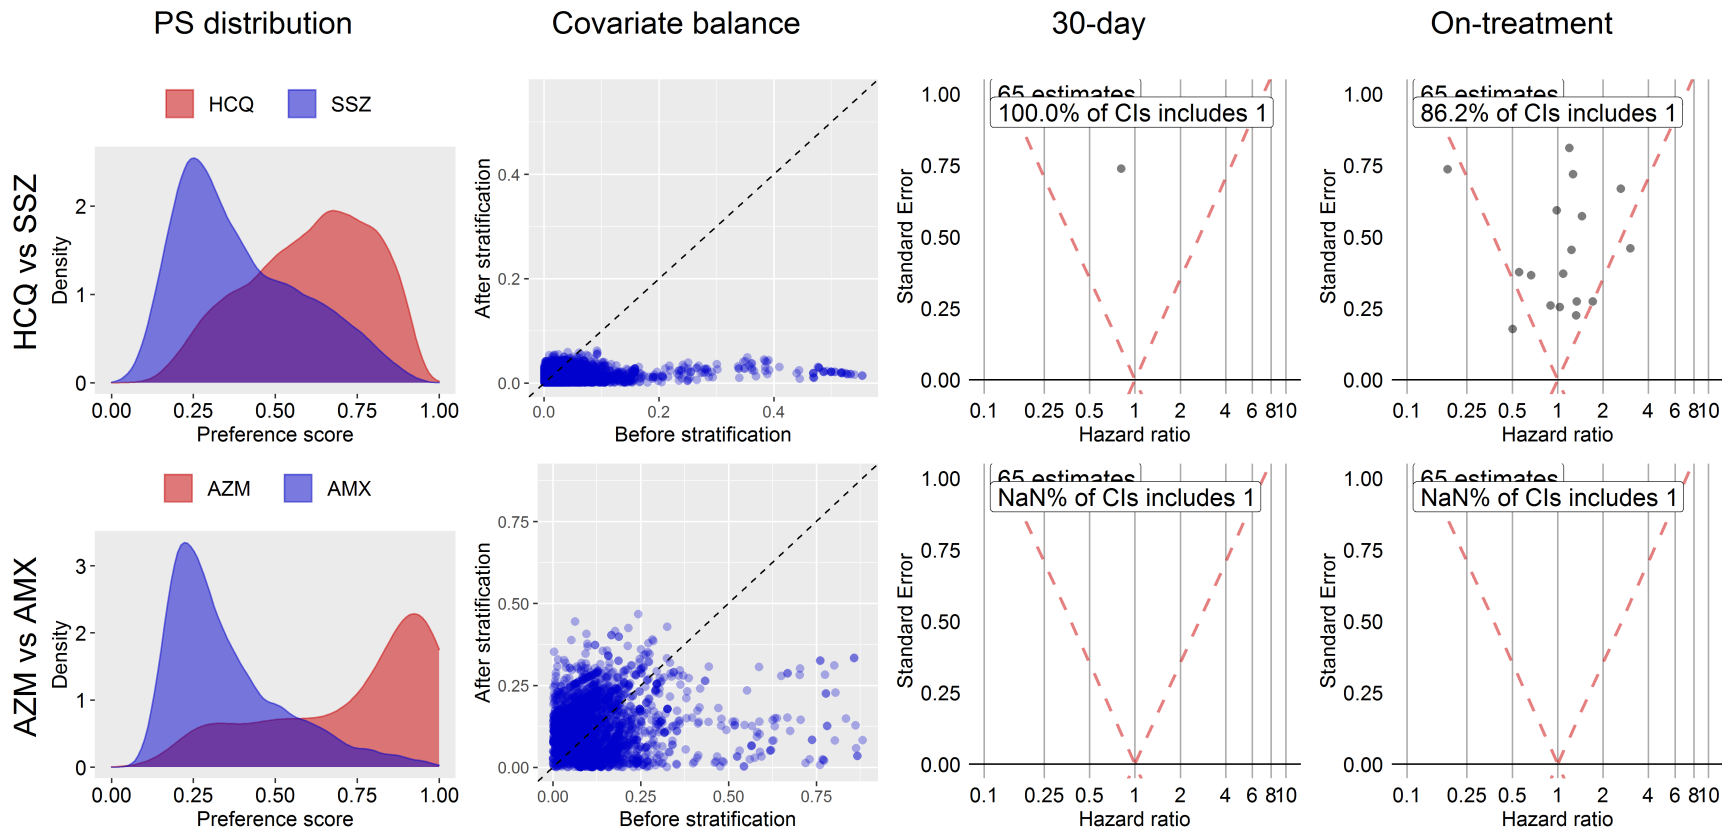

S9.5. DAGGermany

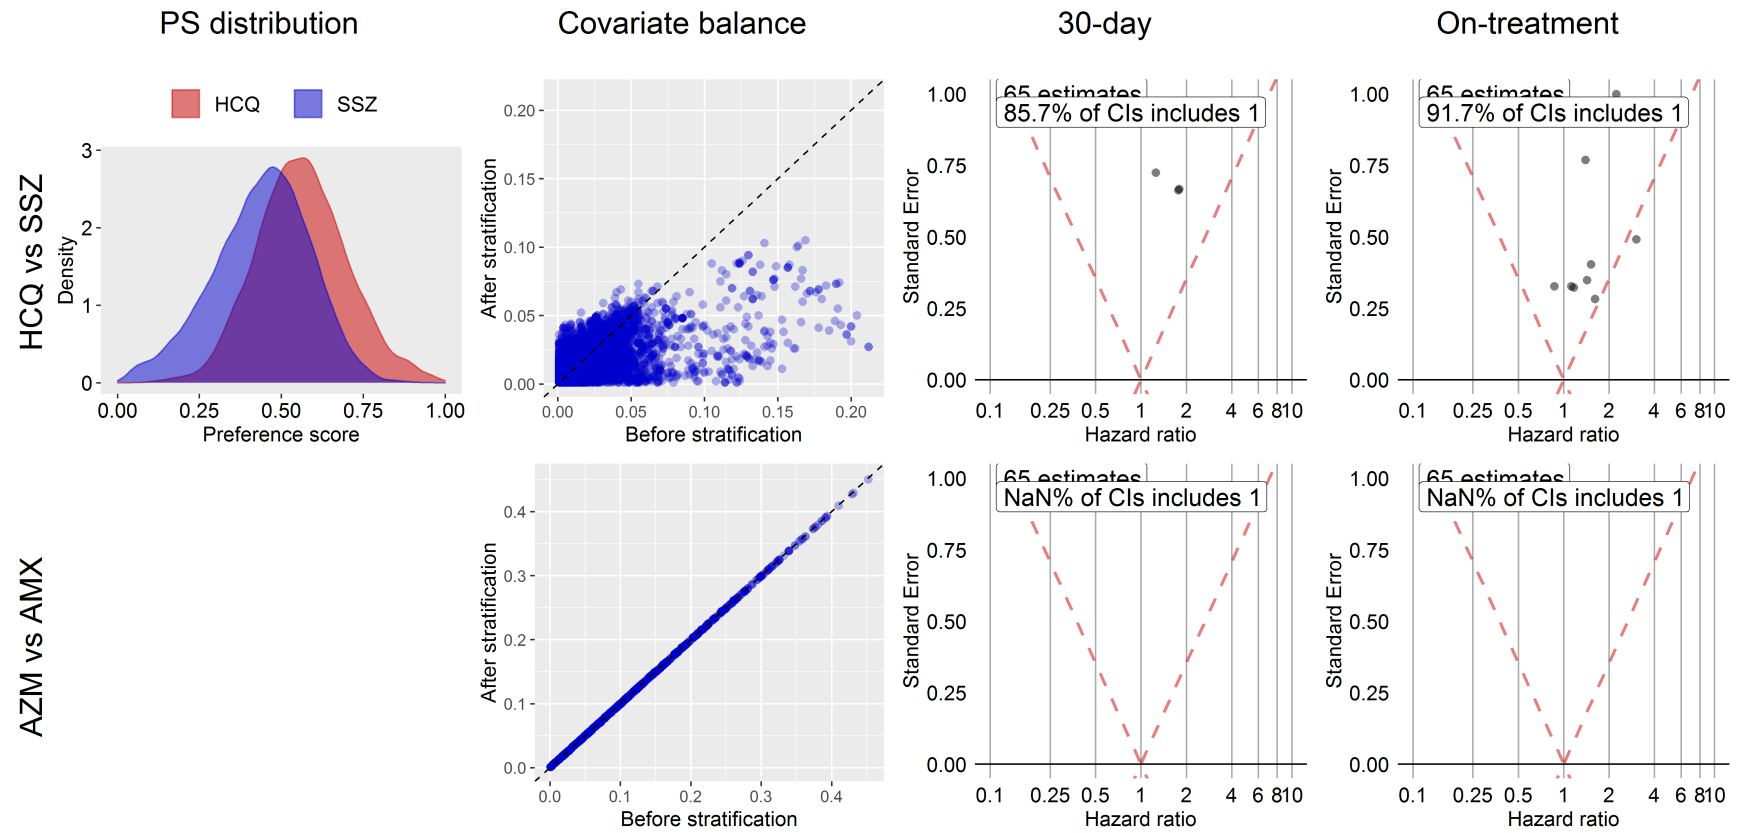

S9.6. IMRD

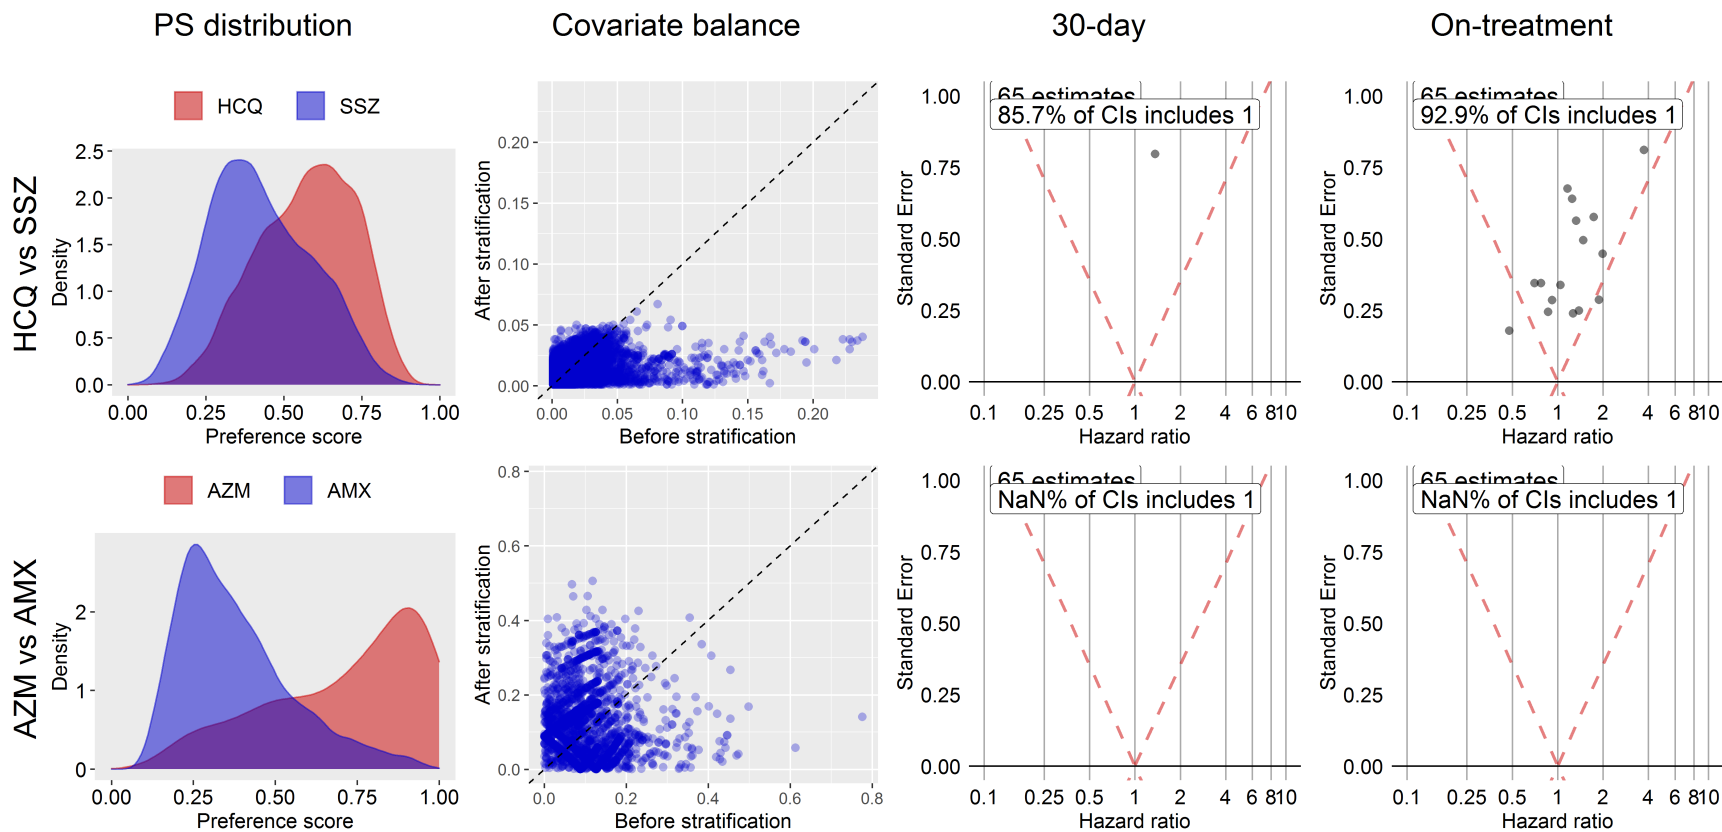

S9.7. IPCI

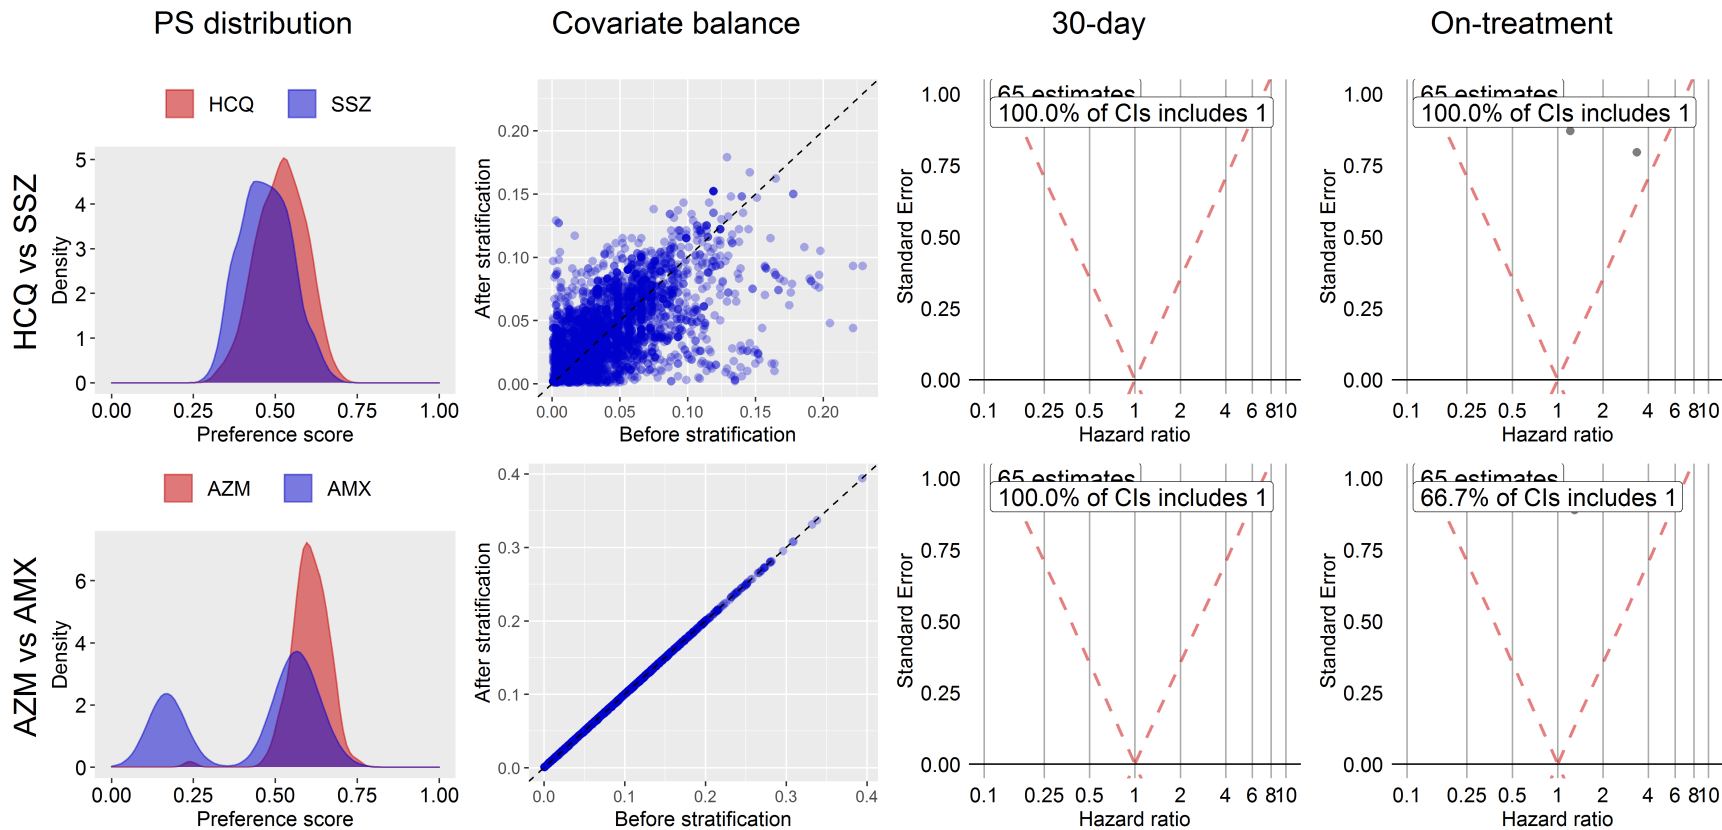

S9.8. JMDC

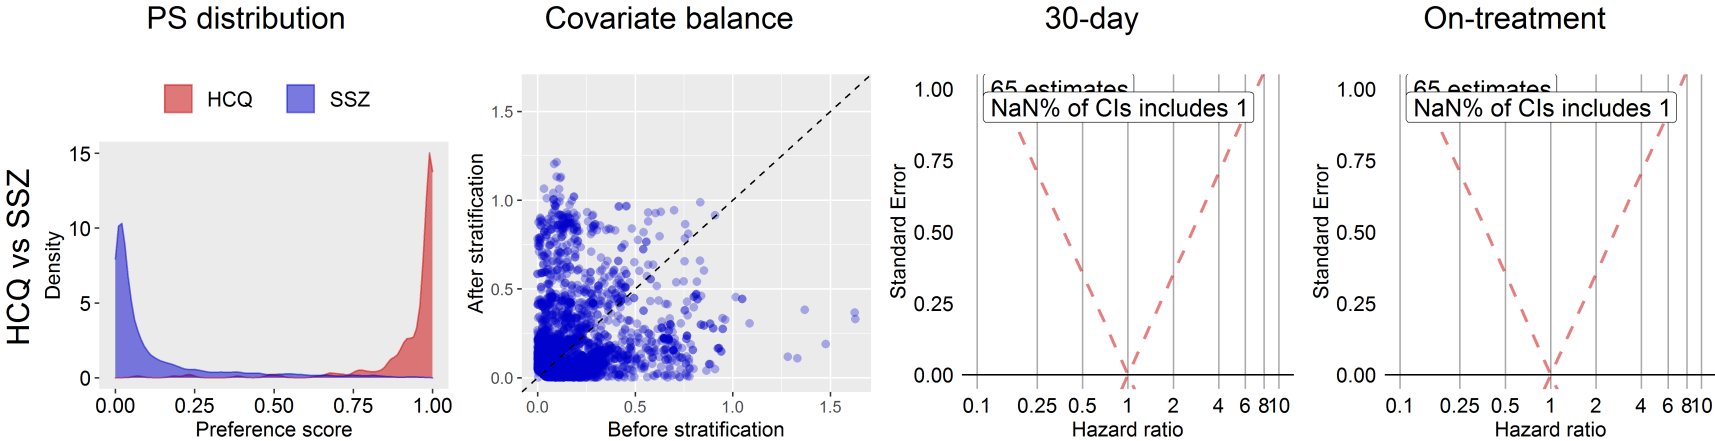

AZM vs AMX

S9.9. MDCD

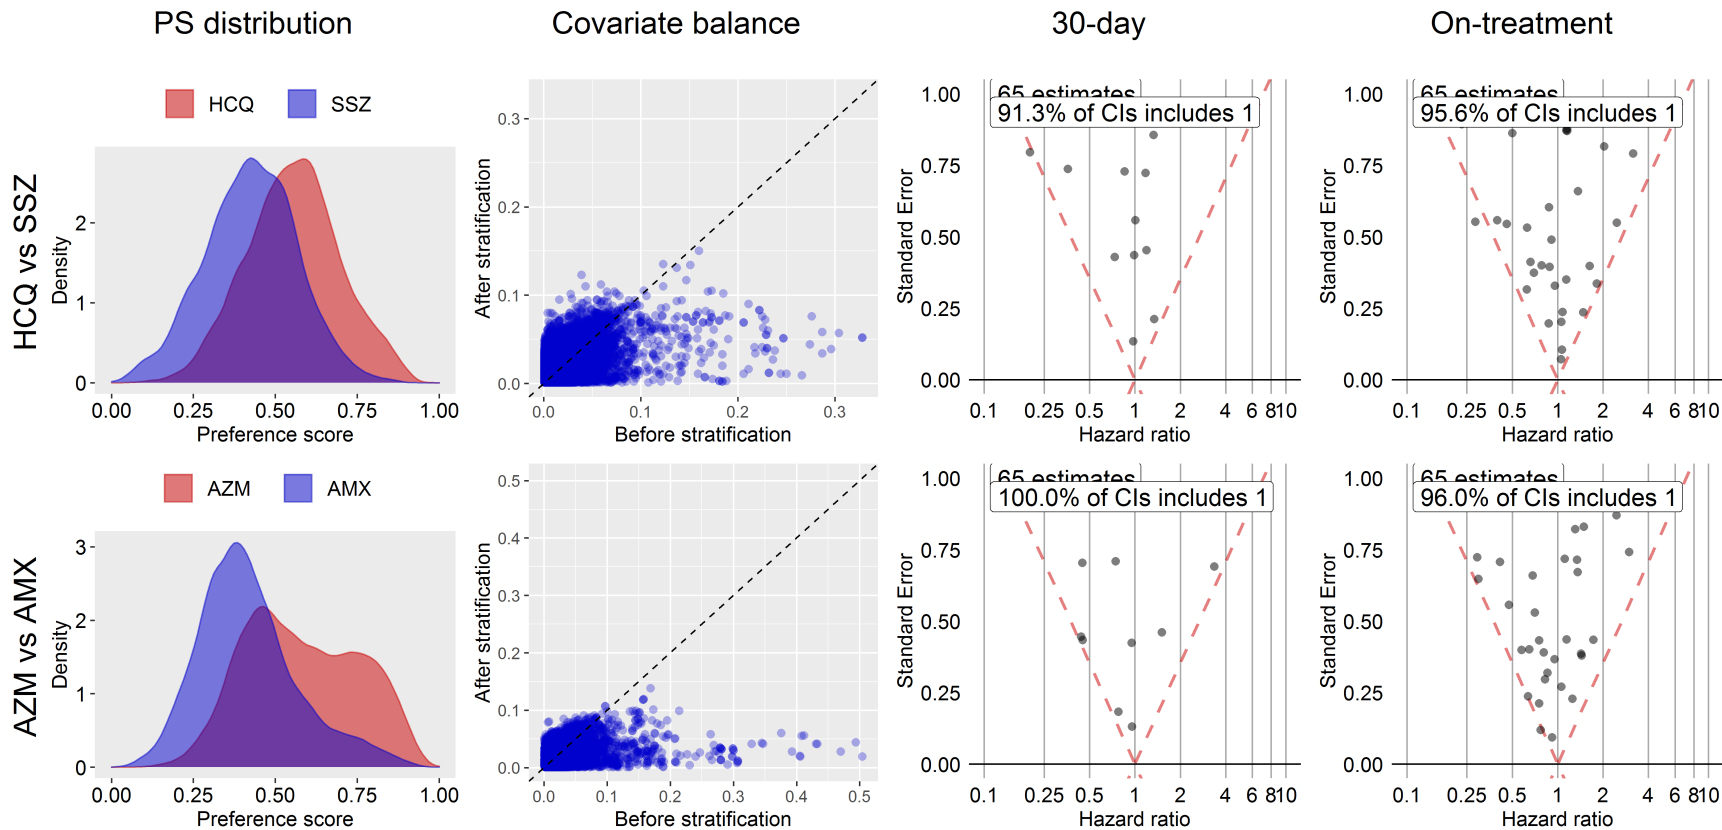

S9.10. MDCR

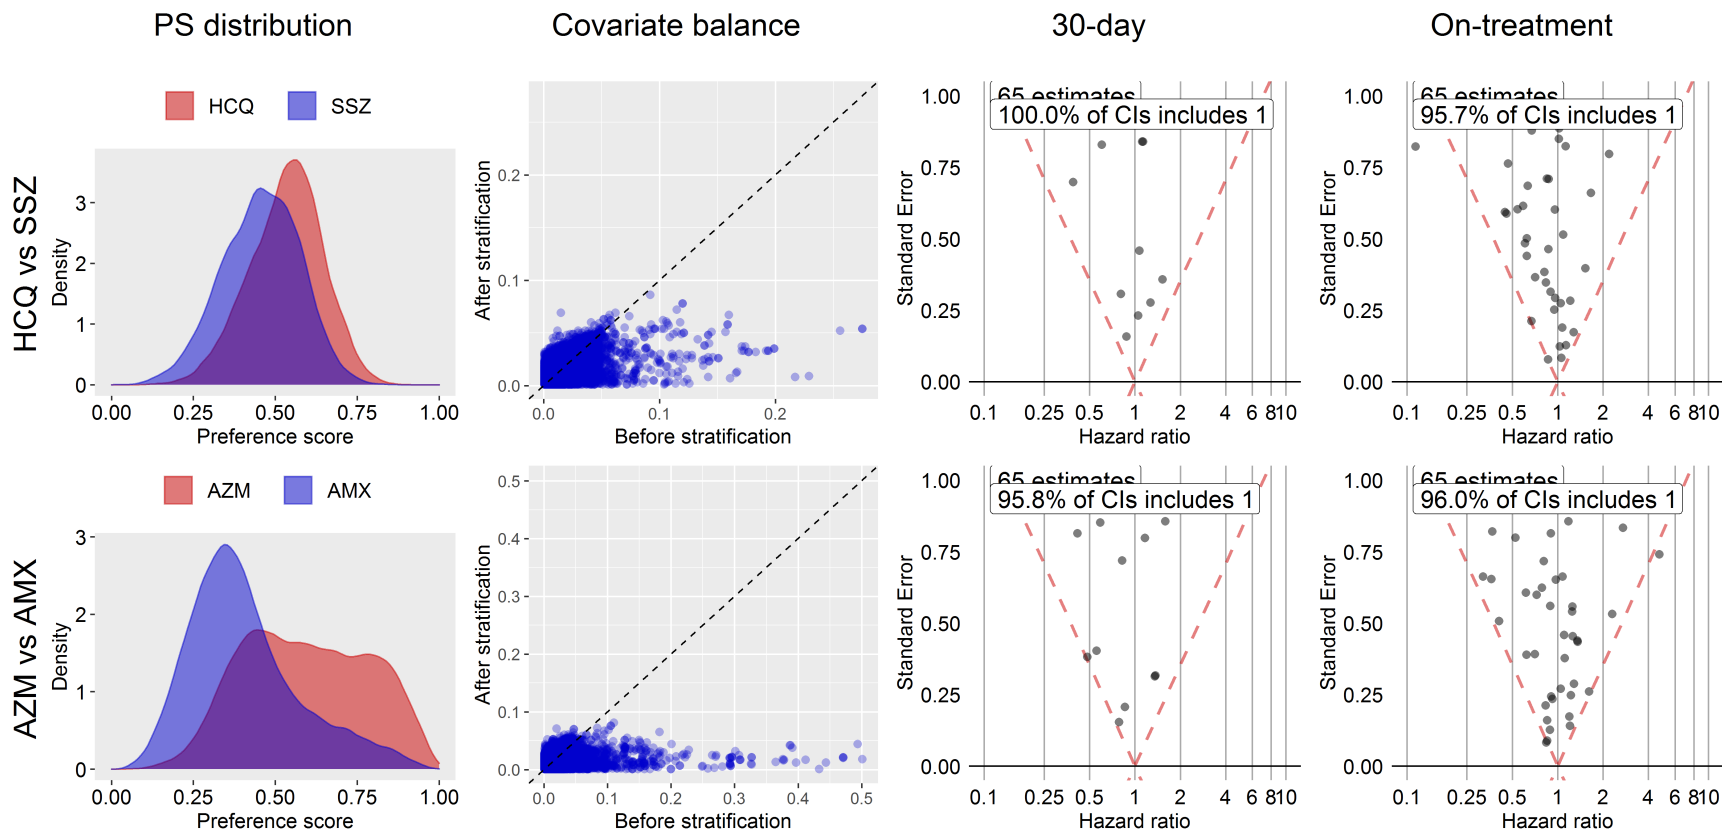

S9.11. OpenClaims

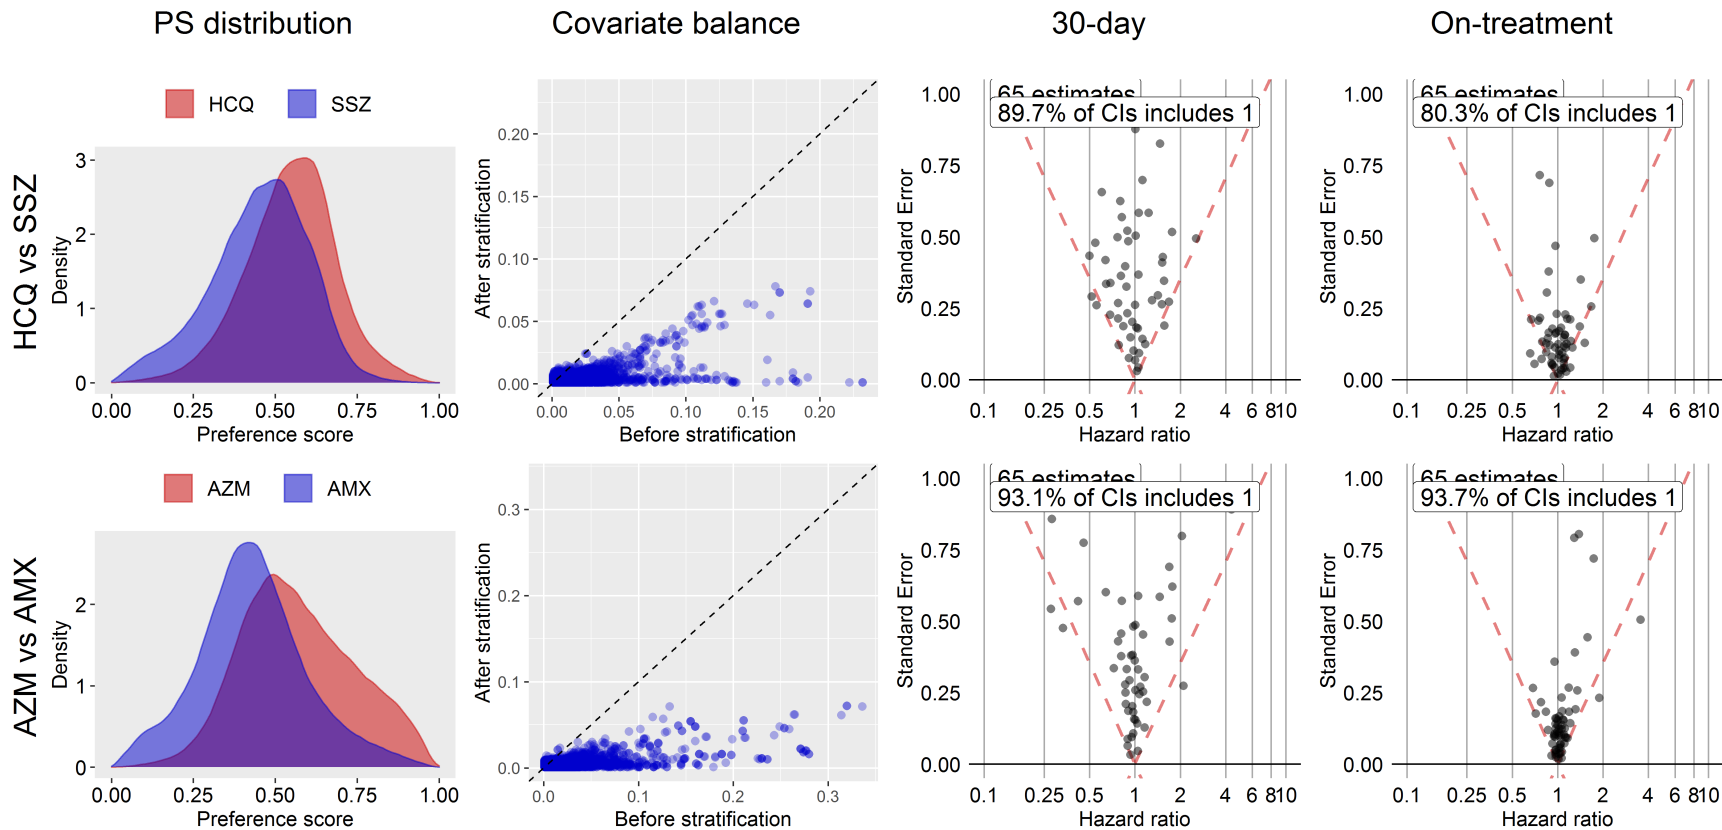



S9.12. OptumEHR

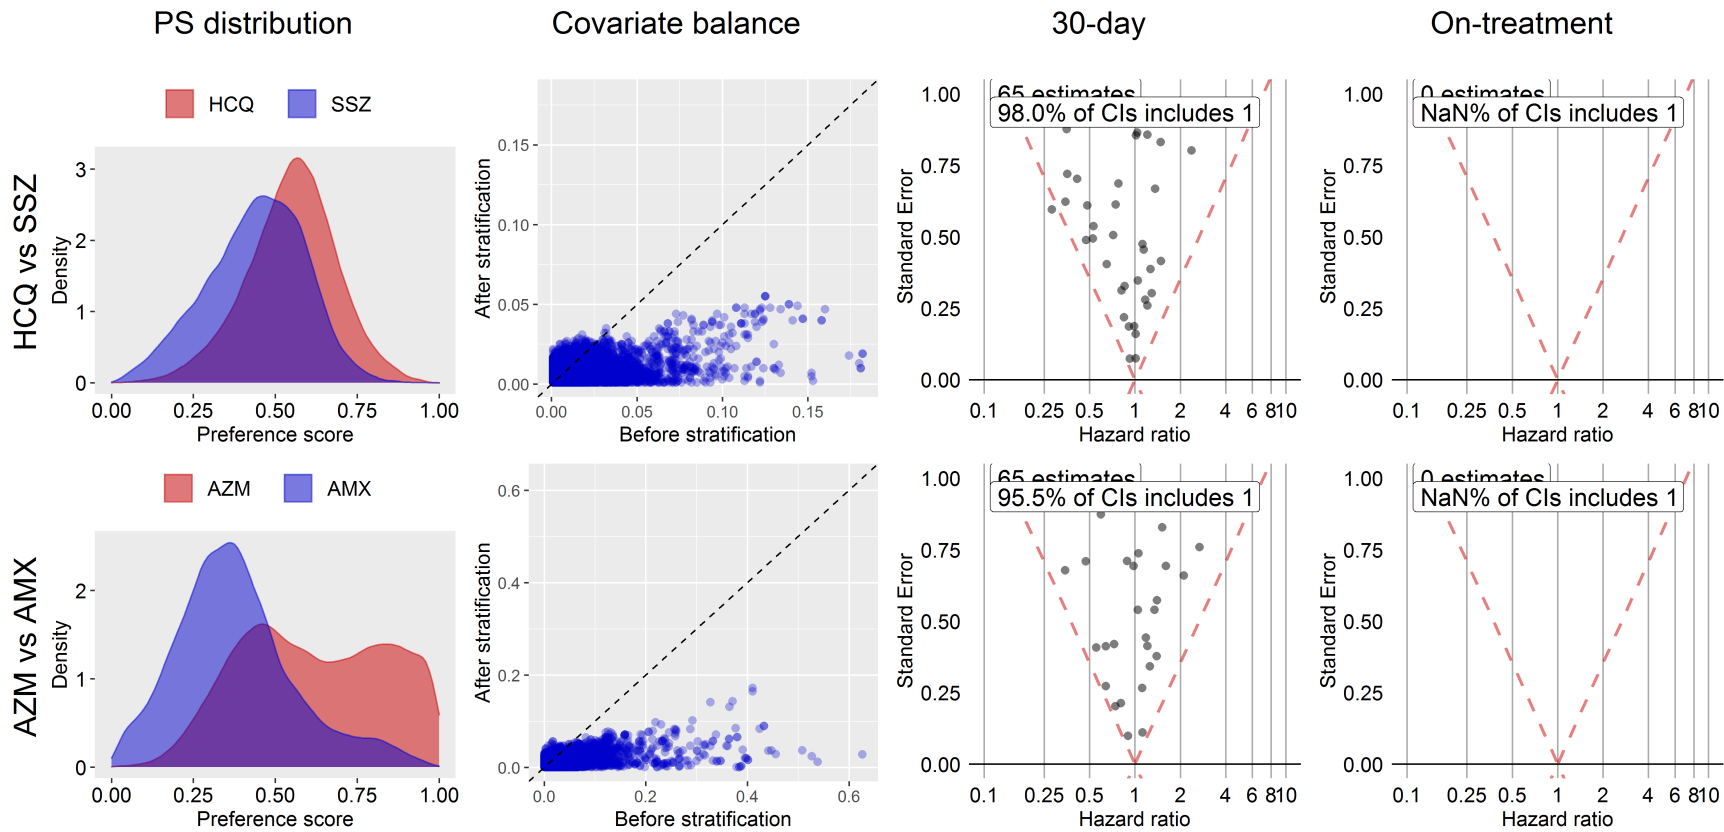

S9.13. SIDIAP

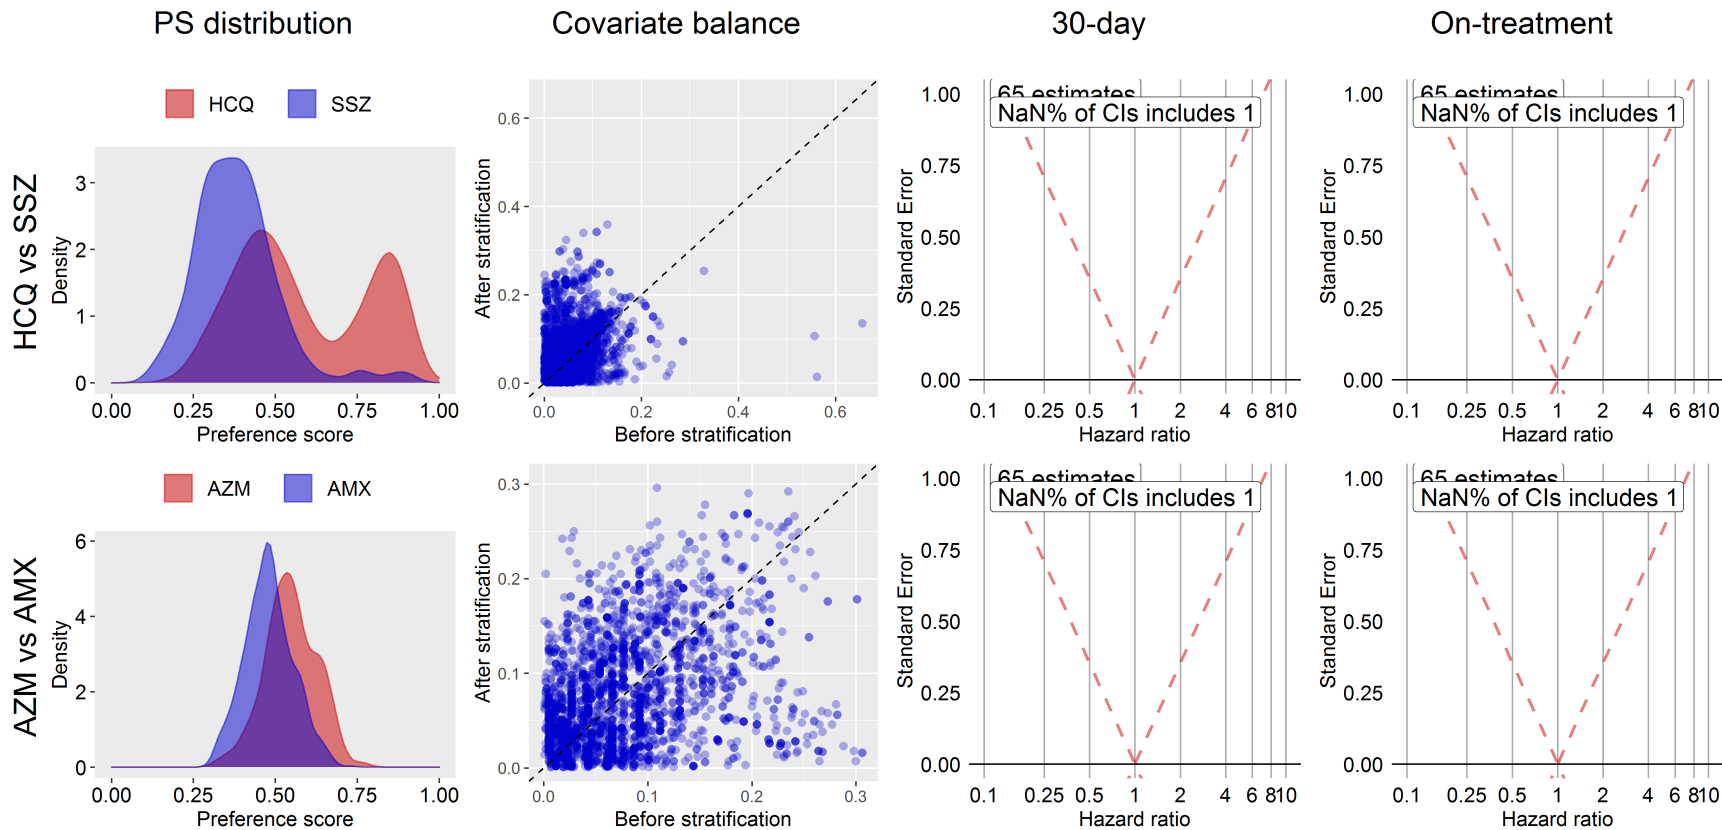

S9.14. VA

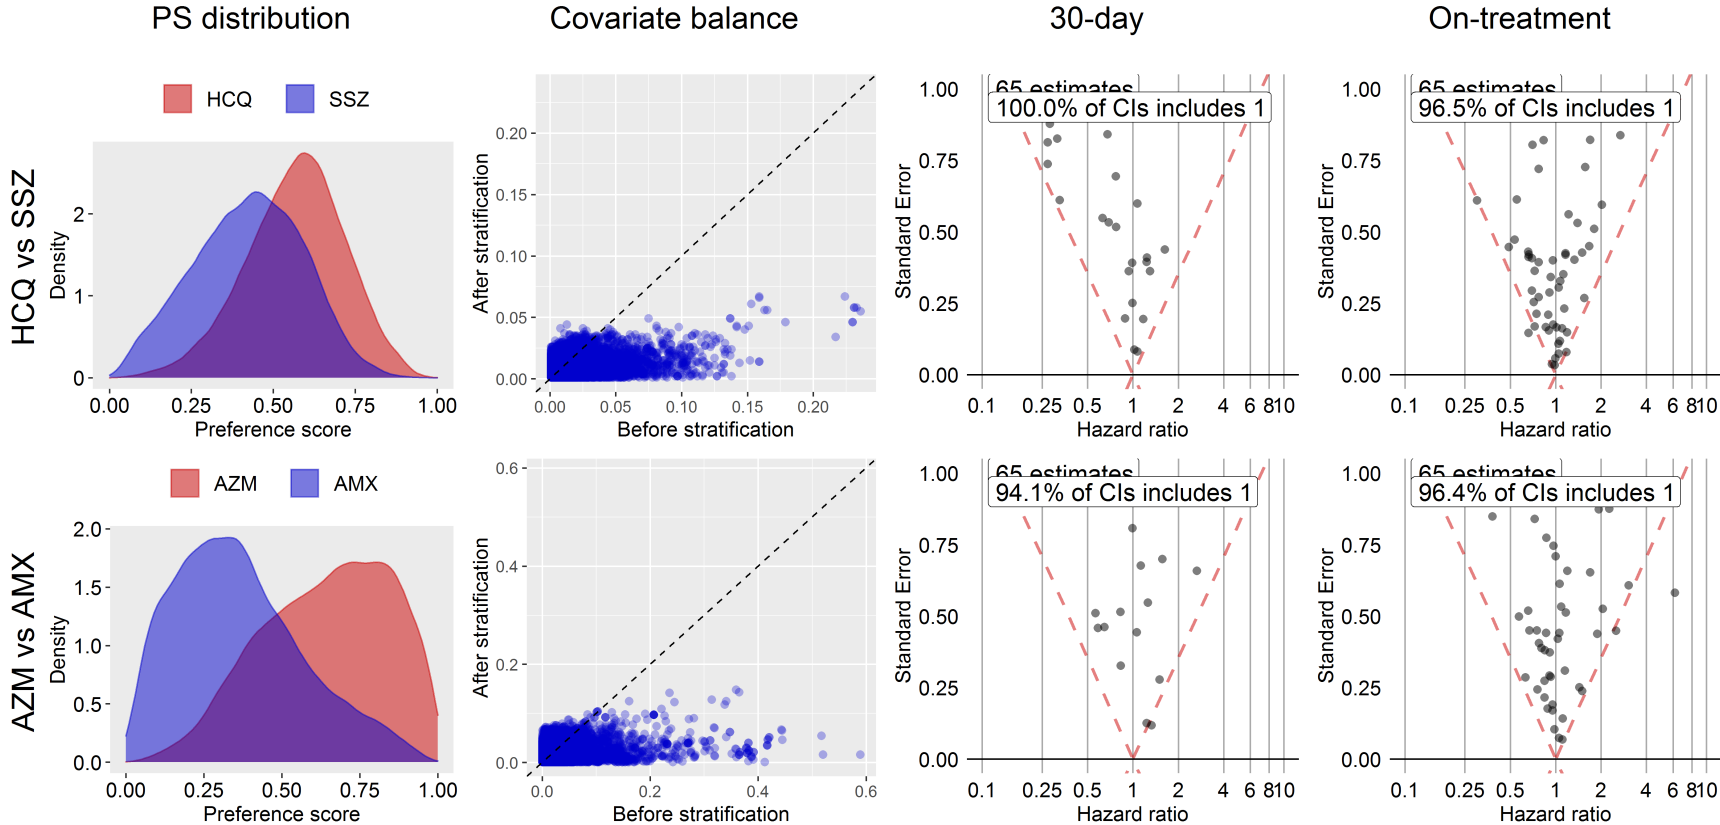

**S10. Self-controlled case series results for hydroxychloroquine****S10.1. CCAE**

| Outcome                   | Analysis                                  | Cases  | IRR  | 95%<br>CI LB | 95%<br>CI UB | Calibrated<br>P | Calibrated<br>IRR | Calibrated<br>95% CI<br>LB | Calibrated<br>95% CI<br>UB |
|---------------------------|-------------------------------------------|--------|------|--------------|--------------|-----------------|-------------------|----------------------------|----------------------------|
| Myocardial infarction     | Adjusting for event-dependent observation | 14,483 | 0.91 | 0.83         | 0.99         | 0.53            | 0.91              | 0.69                       | 1.21                       |
|                           | Primary analysis                          | 14,483 | 0.91 | 0.84         | 1            | 0.57            | 0.92              | 0.7                        | 1.22                       |
| Acute pancreatitis events | Adjusting for event-dependent observation | 13,221 | NA   | NA           | NA           | NA              | NA                | NA                         | NA                         |
|                           | Primary analysis                          | 13,221 | 0.89 | 0.81         | 0.99         | 0.48            | 0.9               | 0.68                       | 1.2                        |
| Acute renal failure       | Adjusting for event-dependent observation | 17,178 | 0.88 | 0.82         | 0.94         | 0.38            | 0.88              | 0.67                       | 1.16                       |
|                           | Primary analysis                          | 17,178 | 0.9  | 0.84         | 0.96         | 0.47            | 0.9               | 0.69                       | 1.19                       |
| Gastrointestinal bleeding | Adjusting for event-dependent observation | 15,638 | NA   | NA           | NA           | NA              | NA                | NA                         | NA                         |
|                           | Primary analysis                          | 15,638 | 1    | 0.92         | 1.07         | 0.94            | 1.01              | 0.76                       | 1.32                       |
| Cardiac arrhythmia        | Adjusting for event-dependent observation | 14,328 | 0.94 | 0.86         | 1.03         | 0.71            | 0.95              | 0.72                       | 1.25                       |
|                           | Primary analysis                          | 14,328 | 0.94 | 0.86         | 1.03         | 0.74            | 0.95              | 0.72                       | 1.26                       |
| Bradycardia               | Adjusting for event-dependent observation | 12,248 | NA   | NA           | NA           | NA              | NA                | NA                         | NA                         |
|                           | Primary analysis                          | 12,248 | 0.71 | 0.63         | 0.81         | 0.03            | 0.72              | 0.54                       | 0.96                       |
| Chest pain or angina      | Adjusting for event-dependent observation | 13,399 | 0.9  | 0.81         | 1            | 0.53            | 0.91              | 0.69                       | 1.21                       |
|                           | Primary analysis                          | 13,399 | 0.9  | 0.81         | 1            | 0.52            | 0.91              | 0.69                       | 1.21                       |
| End stage renal disease   | Adjusting for event-dependent observation | 11,303 | 1.01 | 0.65         | 1.16         | 0.93            | 1.02              | 0.69                       | 1.51                       |
|                           | Primary analysis                          | 11,303 | 1.02 | 0.88         | 1.18         | 0.85            | 1.03              | 0.76                       | 1.39                       |
| Heart failure             | Adjusting for event-dependent observation | 15,626 | 0.98 | 0.9          | 1.05         | 0.91            | 0.99              | 0.75                       | 1.29                       |
|                           | Primary analysis                          | 15,626 | 0.98 | 0.91         | 1.06         | 0.93            | 0.99              | 0.75                       | 1.3                        |
| Hepatic failure           | Adjusting for event-dependent observation | 11,254 | 0.67 | 0.57         | 0.78         | 0.01            | 0.68              | 0.5                        | 0.92                       |
|                           | Primary analysis                          | 11,254 | 0.64 | 0.54         | 0.75         | 0.01            | 0.64              | 0.47                       | 0.88                       |
| Stroke                    | Adjusting for event-dependent observation | 15,535 | NA   | NA           | NA           | NA              | NA                | NA                         | NA                         |
|                           | Primary analysis                          | 15,535 | 0.79 | 0.73         | 0.86         | 0.12            | 0.8               | 0.61                       | 1.06                       |
| Cardiovascular events     | Adjusting for event-dependent observation | 15,200 | NA   | NA           | NA           | NA              | NA                | NA                         | NA                         |
|                           | Primary analysis                          | 15,200 | 0.86 | 0.79         | 0.93         | 0.3             | 0.86              | 0.66                       | 1.14                       |
| Transient ischemic attack | Adjusting for event-dependent observation | 14,563 | 0.9  | 0.85         | 0.98         | 0.51            | 0.91              | 0.69                       | 1.2                        |
|                           | Primary analysis                          | 14,563 | 0.91 | 0.83         | 0.99         | 0.55            | 0.92              | 0.7                        | 1.21                       |
| Venous thromboembolism    | Adjusting for event-dependent observation | 16,595 | 0.78 | 0.5          | 0.84         | 0.22            | 0.79              | 0.54                       | 1.15                       |
|                           | Primary analysis                          | 16,595 | 0.8  | 0.75         | 0.86         | 0.14            | 0.81              | 0.62                       | 1.07                       |

**IRR**= Incidence Rate Ratio **95%CI LB**= 95% Confidence Interval Lower Boundary **95%CI UB**= 95% Confidence Interval Upper Boundary

## S10.2. Clinformatics

| Outcome                   | Analysis                                  | Cases  | IRR  | 95%<br>CI<br>LB | 95%<br>CI<br>UB | Calibrated<br>P | Calibrated<br>IRR | Calibrated<br>95% CI<br>LB | Calibrated<br>95% CI UB |
|---------------------------|-------------------------------------------|--------|------|-----------------|-----------------|-----------------|-------------------|----------------------------|-------------------------|
| Myocardial infarction     | Adjusting for event-dependent observation | 14,351 | 1.11 | 1.02            | 1.21            | 0.51            | 1.11              | 0.81                       | 1.54                    |
|                           | Primary analysis                          | 14,351 | 1.01 | 0.92            | 1.1             | 0.92            | 1.02              | 0.74                       | 1.4                     |
| Acute pancreatitis events | Adjusting for event-dependent observation | 12,730 | 1.04 | 0.93            | 1.16            | 0.78            | 1.05              | 0.75                       | 1.46                    |
|                           | Primary analysis                          | 12,730 | 1.04 | 0.93            | 1.16            | 0.78            | 1.05              | 0.75                       | 1.46                    |
| Acute renal failure       | Adjusting for event-dependent observation | 14,919 | 0.96 | 0.48            | 1.04            | 0.88            | 0.96              | 0.58                       | 1.59                    |
|                           | Primary analysis                          | 14,919 | 0.99 | 0.91            | 1.07            | 0.94            | 0.99              | 0.72                       | 1.37                    |
| Gastrointestinal bleeding | Adjusting for event-dependent observation | 14,884 | 1.12 | 1.03            | 1.22            | 0.46            | 1.13              | 0.82                       | 1.55                    |
|                           | Primary analysis                          | 14,884 | 1.05 | 0.97            | 1.14            | 0.74            | 1.06              | 0.77                       | 1.46                    |
| Cardiac arrhythmia        | Adjusting for event-dependent observation | 13,388 | 1.02 | 0.92            | 1.13            | 0.88            | 1.03              | 0.74                       | 1.42                    |
|                           | Primary analysis                          | 13,388 | 1.03 | 0.93            | 1.13            | 0.85            | 1.03              | 0.74                       | 1.43                    |
| Bradycardia               | Adjusting for event-dependent observation | 13,682 | 0.9  | 0.77            | 1               | 0.58            | 0.91              | 0.65                       | 1.27                    |
|                           | Primary analysis                          | 13,682 | 0.92 | 0.83            | 1.01            | 0.63            | 0.92              | 0.67                       | 1.28                    |
| Chest pain or angina      | Adjusting for event-dependent observation | 13,093 | 1.06 | 0.96            | 1.18            | 0.7             | 1.07              | 0.77                       | 1.48                    |
|                           | Primary analysis                          | 13,093 | 1.06 | 0.95            | 1.17            | 0.72            | 1.06              | 0.76                       | 1.47                    |
| End stage renal disease   | Adjusting for event-dependent observation | 11,891 | NA   | NA              | NA              | NA              | NA                | NA                         | NA                      |
|                           | Primary analysis                          | 11,891 | 1.26 | 1.11            | 1.42            | 0.17            | 1.26              | 0.9                        | 1.76                    |
| Heart failure             | Adjusting for event-dependent observation | 13,817 | 1.14 | 1.04            | 1.25            | 0.41            | 1.15              | 0.83                       | 1.58                    |
|                           | Primary analysis                          | 13,817 | 1.12 | 1.02            | 1.23            | 0.47            | 1.13              | 0.82                       | 1.56                    |
| Hepatic failure           | Adjusting for event-dependent observation | 11,571 | NA   | NA              | NA              | NA              | NA                | NA                         | NA                      |
|                           | Primary analysis                          | 11,571 | 0.72 | 0.62            | 0.83            | 0.07            | 0.73              | 0.52                       | 1.02                    |
| Stroke                    | Adjusting for event-dependent observation | 14,342 | 0.97 | 0.89            | 1.05            | 0.86            | 0.97              | 0.7                        | 1.34                    |
|                           | Primary analysis                          | 14,342 | 0.89 | 0.82            | 0.97            | 0.51            | 0.9               | 0.65                       | 1.24                    |
| Cardiovascular events     | Adjusting for event-dependent observation | 14,189 | 0.9  | 0.18            | 0.98            | 0.82            | 0.9               | 0.37                       | 2.21                    |
|                           | Primary analysis                          | 14,189 | 0.94 | 0.86            | 1.03            | 0.75            | 0.95              | 0.69                       | 1.31                    |
| Transient ischemic attack | Adjusting for event-dependent observation | 14,895 | 0.94 | 0.86            | 1.02            | 0.73            | 0.94              | 0.68                       | 1.3                     |
|                           | Primary analysis                          | 14,895 | 0.93 | 0.85            | 1.01            | 0.68            | 0.93              | 0.68                       | 1.29                    |
| Venous thromboembolism    | Adjusting for event-dependent observation | 15,377 | 0.85 | 0.79            | 0.92            | 0.36            | 0.86              | 0.62                       | 1.18                    |
|                           | Primary analysis                          | 15,377 | 0.84 | 0.77            | 0.91            | 0.3             | 0.84              | 0.61                       | 1.16                    |

IRR= Incidence Rate Ratio 95%CI LB= 95% Confidence Interval Lower Boundary 95%CI UB= 95% Confidence Interval Upper Boundary

## S10.3. CPRD

| Outcome                   | Analysis                                  | Cases  | IRR  | 95%<br>CI LB | 95%<br>CI UB | Calibrated<br>P | Calibrated<br>IRR | Calibrated<br>95% CI LB | Calibrated<br>95% CI<br>UB |
|---------------------------|-------------------------------------------|--------|------|--------------|--------------|-----------------|-------------------|-------------------------|----------------------------|
| Myocardial infarction     | Adjusting for event-dependent observation | 0      | NA   | NA           | NA           | NA              | NA                | NA                      | NA                         |
|                           | Primary analysis                          | 0      | NA   | NA           | NA           | NA              | NA                | NA                      | NA                         |
| Acute pancreatitis events | Adjusting for event-dependent observation | 0      | NA   | NA           | NA           | NA              | NA                | NA                      | NA                         |
|                           | Primary analysis                          | 0      | NA   | NA           | NA           | NA              | NA                | NA                      | NA                         |
| Acute renal failure       | Adjusting for event-dependent observation | 0      | NA   | NA           | NA           | NA              | NA                | NA                      | NA                         |
|                           | Primary analysis                          | 0      | NA   | NA           | NA           | NA              | NA                | NA                      | NA                         |
| Gastrointestinal bleeding | Adjusting for event-dependent observation | 0      | NA   | NA           | NA           | NA              | NA                | NA                      | NA                         |
|                           | Primary analysis                          | 0      | NA   | NA           | NA           | NA              | NA                | NA                      | NA                         |
| Cardiac arrhythmia        | Adjusting for event-dependent observation | 12,614 | 0.86 | 0.77         | 0.97         | 0.81            | 0.95              | 0.61                    | 1.47                       |
|                           | Primary analysis                          | 12,614 | 0.87 | 0.77         | 0.98         | 0.83            | 0.95              | 0.61                    | 1.48                       |
| Bradycardia               | Adjusting for event-dependent observation | 7,094  | 0.6  | 0.18         | 1.68         | 0.49            | 0.65              | 0.2                     | 2.16                       |
|                           | Primary analysis                          | 7,094  | 0.62 | 0.19         | 1.69         | 0.51            | 0.68              | 0.21                    | 2.18                       |
| Chest pain or angina      | Adjusting for event-dependent observation | 13,376 | 0.89 | 0.8          | 1            | 0.9             | 0.98              | 0.63                    | 1.52                       |
|                           | Primary analysis                          | 13,376 | 0.89 | 0.8          | 1            | 0.9             | 0.98              | 0.63                    | 1.52                       |
| End stage renal disease   | Adjusting for event-dependent observation | 1,496  | 0.84 | 0.14         | 4.51         | 0.92            | 0.91              | 0.15                    | 5.49                       |
|                           | Primary analysis                          | 1,496  | 0.83 | 0.14         | 4.41         | 0.91            | 0.91              | 0.15                    | 5.31                       |
| Heart failure             | Adjusting for event-dependent observation | 10,215 | 1.1  | 0.76         | 1.56         | 0.53            | 1.2               | 0.69                    | 2.09                       |
|                           | Primary analysis                          | 10,215 | 1.1  | 0.77         | 1.58         | 0.52            | 1.21              | 0.69                    | 2.11                       |
| Hepatic failure           | Adjusting for event-dependent observation | 2,710  | 1    | NA           | NA           | NA              | NA                | NA                      | NA                         |
|                           | Primary analysis                          | 2,710  | 0.09 | 0            | 0.77         | 0.08            | 0.09              | 0.01                    | 1.35                       |
| Stroke                    | Adjusting for event-dependent observation | 0      | NA   | NA           | NA           | NA              | NA                | NA                      | NA                         |
|                           | Primary analysis                          | 0      | NA   | NA           | NA           | NA              | NA                | NA                      | NA                         |
| Cardiovascular events     | Adjusting for event-dependent observation | 0      | NA   | NA           | NA           | NA              | NA                | NA                      | NA                         |
|                           | Primary analysis                          | 0      | NA   | NA           | NA           | NA              | NA                | NA                      | NA                         |
| Transient ischemic attack | Adjusting for event-dependent observation | 0      | NA   | NA           | NA           | NA              | NA                | NA                      | NA                         |
|                           | Primary analysis                          | 0      | NA   | NA           | NA           | NA              | NA                | NA                      | NA                         |
| Venous thromboembolism    | Adjusting for event-dependent observation | 12,454 | 0.64 | 0.56         | 0.72         | 0.12            | 0.7               | 0.45                    | 1.09                       |
|                           | Primary analysis                          | 12,454 | 0.63 | 0.55         | 0.71         | 0.11            | 0.69              | 0.44                    | 1.07                       |

IRR= Incidence Rate Ratio 95%CI LB= 95% Confidence Interval Lower Boundary 95%CI UB= 95% Confidence Interval Upper Boundary

## S10.4. JMDC

| Outcome                   | Analysis                                  | Cases  | IRR  | 95%<br>CI LB | 95%<br>CI UB | Calibrated<br>P | Calibrated<br>IRR | Calibrated<br>95% CI<br>LB | Calibrated<br>95% CI UB |
|---------------------------|-------------------------------------------|--------|------|--------------|--------------|-----------------|-------------------|----------------------------|-------------------------|
| Myocardial infarction     | Adjusting for event-dependent observation | 5,788  | 0    | NA           | 0            | NA              | NA                | NA                         | NA                      |
|                           | Primary analysis                          | 5,789  | 0    | NA           | 1.19         | NA              | NA                | NA                         | NA                      |
| Acute pancreatitis events | Adjusting for event-dependent observation | 5,307  | 1.42 | 0.06         | 25.06        | 0.62            | 2.18              | 0.11                       | 43.82                   |
|                           | Primary analysis                          | 5,307  | 1.38 | 0.06         | 13.42        | 0.6             | 2.11              | 0.14                       | 31.5                    |
| Acute renal failure       | Adjusting for event-dependent observation | 3,598  | 0.86 | 0.18         | 3.12         | 0.73            | 1.33              | 0.31                       | 5.71                    |
|                           | Primary analysis                          | 3,598  | 0.91 | 0.19         | 3.37         | 0.69            | 1.39              | 0.32                       | 6.12                    |
| Gastrointestinal bleeding | Adjusting for event-dependent observation | 10,009 | 0.16 | 0.01         | 0.82         | 0.25            | 0.25              | 0.03                       | 2.44                    |
|                           | Primary analysis                          | 10,009 | 0.16 | 0.01         | 0.79         | 0.24            | 0.24              | 0.03                       | 2.38                    |
| Cardiac arrhythmia        | Adjusting for event-dependent observation | 10,034 | 0.4  | 0.11         | 1.2          | 0.5             | 0.62              | 0.18                       | 2.15                    |
|                           | Primary analysis                          | 10,034 | 0.38 | 0.1          | 1.11         | 0.43            | 0.58              | 0.17                       | 1.98                    |
| Bradycardia               | Adjusting for event-dependent observation | 5,813  | 2.4  | 0.11         | 20.87        | 0.35            | 3.67              | 0.26                       | 50.91                   |
|                           | Primary analysis                          | 5,813  | 2.41 | 0.11         | 21.25        | 0.35            | 3.69              | 0.26                       | 51.54                   |
| Chest pain or angina      | Adjusting for event-dependent observation | 10,082 | 0.6  | 0.32         | 1.09         | 0.74            | 0.92              | 0.45                       | 1.85                    |
|                           | Primary analysis                          | 10,082 | 0.6  | 0.31         | 1.08         | 0.74            | 0.91              | 0.45                       | 1.84                    |
| End stage renal disease   | Adjusting for event-dependent observation | 2,439  | NA   | NA           | NA           | NA              | NA                | NA                         | NA                      |
|                           | Primary analysis                          | 2,445  | NA   | NA           | NA           | NA              | NA                | NA                         | NA                      |
| Heart failure             | Adjusting for event-dependent observation | 10,071 | 0.67 | 0.34         | 1.23         | 0.77            | 1.02              | 0.5                        | 2.1                     |
|                           | Primary analysis                          | 10,071 | 0.66 | 0.34         | 1.22         | 0.76            | 1.02              | 0.49                       | 2.08                    |
| Hepatic failure           | Adjusting for event-dependent observation | 3,014  | 1    | 0.04         | 15.31        | 0.79            | 1.54              | 0.08                       | 30.15                   |
|                           | Primary analysis                          | 3,014  | 0.97 | 0.04         | 18.75        | 0.81            | 1.48              | 0.07                       | 33.23                   |
| Stroke                    | Adjusting for event-dependent observation | 10,001 | 0.74 | 0.23         | 2.1          | 0.8             | 1.13              | 0.36                       | 3.55                    |
|                           | Primary analysis                          | 10,001 | 0.74 | 0.23         | 2.12         | 0.8             | 1.14              | 0.36                       | 3.59                    |
| Cardiovascular events     | Adjusting for event-dependent observation | 10,035 | 0.33 | 0.13         | 0.72         | 0.21            | 0.51              | 0.21                       | 1.25                    |
|                           | Primary analysis                          | 10,035 | 0.33 | 0.13         | 0.72         | 0.2             | 0.5               | 0.2                        | 1.25                    |
| Transient ischemic attack | Adjusting for event-dependent observation | 2,208  | 0    | NA           | 0            | NA              | NA                | NA                         | NA                      |
|                           | Primary analysis                          | 2,208  | 0    | NA           | 38.67        | NA              | NA                | NA                         | NA                      |
| Venous thromboembolism    | Adjusting for event-dependent observation | 10,029 | 0.98 | 0.41         | 2.14         | 0.45            | 1.51              | 0.62                       | 3.67                    |
|                           | Primary analysis                          | 10,029 | 0.98 | 0.41         | 2.14         | 0.45            | 1.51              | 0.62                       | 3.67                    |

IRR= Incidence Rate Ratio 95%CI LB= 95% Confidence Interval Lower Boundary 95%CI UB= 95% Confidence Interval Upper Boundary

**S10.5. MDCD**

| Outcome                   | Analysis                                  | Cases  | IRR  | 95% CI<br>LB | 95% CI<br>UB | Calibrated<br>P | Calibrated<br>IRR | Calibrated<br>95% CI<br>LB | Calibrated<br>95% CI<br>UB |
|---------------------------|-------------------------------------------|--------|------|--------------|--------------|-----------------|-------------------|----------------------------|----------------------------|
| Myocardial infarction     | Adjusting for event-dependent observation | 11,276 | NA   | NA           | NA           | NA              | NA                | NA                         | NA                         |
|                           | Primary analysis                          | 11,276 | 0.97 | 0.83         | 1.13         | 0.39            | 0.89              | 0.7                        | 1.15                       |
| Acute pancreatitis events | Adjusting for event-dependent observation | 10,851 | 1.22 | 1.02         | 1.46         | 0.39            | 1.13              | 0.86                       | 1.47                       |
|                           | Primary analysis                          | 10,851 | 1.22 | 1.02         | 1.45         | 0.4             | 1.12              | 0.86                       | 1.46                       |
| Acute renal failure       | Adjusting for event-dependent observation | 12,714 | NA   | NA           | NA           | NA              | NA                | NA                         | NA                         |
|                           | Primary analysis                          | 12,714 | 1.09 | 0.98         | 1.21         | 0.92            | 1                 | 0.8                        | 1.25                       |
| Gastrointestinal bleeding | Adjusting for event-dependent observation | 12,000 | 1.03 | 0.91         | 1.16         | 0.66            | 0.95              | 0.75                       | 1.2                        |
|                           | Primary analysis                          | 12,000 | 1.03 | 0.91         | 1.17         | 0.69            | 0.95              | 0.76                       | 1.2                        |
| Cardiac arrhythmia        | Adjusting for event-dependent observation | 12,340 | 1.01 | 0.89         | 1.13         | 0.53            | 0.93              | 0.74                       | 1.17                       |
|                           | Primary analysis                          | 12,340 | 1.01 | 0.89         | 1.13         | 0.54            | 0.93              | 0.74                       | 1.17                       |
| Bradycardia               | Adjusting for event-dependent observation | 10,541 | NA   | NA           | NA           | NA              | NA                | NA                         | NA                         |
|                           | Primary analysis                          | 10,541 | 0.8  | 0.64         | 1            | 0.05            | 0.74              | 0.55                       | 0.99                       |
| Chest pain or angina      | Adjusting for event-dependent observation | 11,642 | 1.17 | 0.98         | 1.34         | 0.59            | 1.07              | 0.84                       | 1.38                       |
|                           | Primary analysis                          | 11,642 | 1.16 | 1.01         | 1.34         | 0.58            | 1.07              | 0.84                       | 1.36                       |
| End stage renal disease   | Adjusting for event-dependent observation | 10,562 | NA   | NA           | NA           | NA              | NA                | NA                         | NA                         |
|                           | Primary analysis                          | 10,562 | 1.34 | 1.1          | 1.64         | 0.15            | 1.24              | 0.93                       | 1.64                       |
| Heart failure             | Adjusting for event-dependent observation | 12,030 | 1.03 | 0.91         | 1.17         | 0.68            | 0.95              | 0.75                       | 1.2                        |
|                           | Primary analysis                          | 12,030 | 1.03 | 0.91         | 1.17         | 0.68            | 0.95              | 0.75                       | 1.2                        |
| Hepatic failure           | Adjusting for event-dependent observation | 10,278 | 0.91 | 0.7          | 1.17         | 0.29            | 0.83              | 0.6                        | 1.16                       |
|                           | Primary analysis                          | 10,278 | 0.83 | 0.64         | 1.09         | 0.13            | 0.77              | 0.55                       | 1.07                       |
| Stroke                    | Adjusting for event-dependent observation | 11,662 | 0.98 | 0.86         | 1.12         | 0.4             | 0.9               | 0.71                       | 1.14                       |
|                           | Primary analysis                          | 11,662 | 0.92 | 0.81         | 1.06         | 0.2             | 0.85              | 0.67                       | 1.08                       |
| Cardiovascular events     | Adjusting for event-dependent observation | 12,067 | 0.99 | 0.88         | 1.12         | 0.46            | 0.91              | 0.73                       | 1.15                       |
|                           | Primary analysis                          | 12,067 | 0.93 | 0.82         | 1.05         | 0.21            | 0.86              | 0.68                       | 1.08                       |
| Transient ischemic attack | Adjusting for event-dependent observation | 10,938 | 1.02 | 0.86         | 1.22         | 0.66            | 0.94              | 0.72                       | 1.23                       |
|                           | Primary analysis                          | 10,938 | 1    | 0.84         | 1.19         | 0.57            | 0.92              | 0.71                       | 1.2                        |
| Venous thromboembolism    | Adjusting for event-dependent observation | 12,646 | 0.96 | 0.86         | 1.07         | 0.29            | 0.88              | 0.71                       | 1.1                        |
|                           | Primary analysis                          | 12,646 | 0.95 | 0.85         | 1.05         | 0.25            | 0.87              | 0.7                        | 1.09                       |

**IRR=** Incidence Rate Ratio **95%CI LB=** 95% Confidence Interval Lower Boundary **95%CI UB=** 95% Confidence Interval Upper Boundary



**S10.6. MDCR**

| Outcome                   | Analysis                                  | Cases  | IRR  | 95%<br>CI LB | 95%<br>CI UB | Calibrated<br>P | Calibrated<br>IRR | Calibrated<br>95% CI<br>LB | Calibrated<br>95% CI<br>UB |
|---------------------------|-------------------------------------------|--------|------|--------------|--------------|-----------------|-------------------|----------------------------|----------------------------|
| Myocardial infarction     | Adjusting for event-dependent observation | 14,554 | 1.04 | 0.96         | 1.13         | 0.47            | 1.09              | 0.86                       | 1.39                       |
|                           | Primary analysis                          | 14,554 | 0.94 | 0.86         | 1.03         | 0.91            | 0.99              | 0.78                       | 1.26                       |
| Acute pancreatitis events | Adjusting for event-dependent observation | 10,998 | 0.98 | 0.82         | 1.16         | 0.86            | 1.03              | 0.77                       | 1.36                       |
|                           | Primary analysis                          | 10,998 | 0.94 | 0.79         | 1.12         | 0.93            | 0.99              | 0.74                       | 1.32                       |
| Acute renal failure       | Adjusting for event-dependent observation | 15,657 | 1.03 | 0.95         | 1.11         | 0.53            | 1.08              | 0.85                       | 1.37                       |
|                           | Primary analysis                          | 15,657 | 0.92 | 0.85         | 1            | 0.8             | 0.97              | 0.76                       | 1.23                       |
| Gastrointestinal bleeding | Adjusting for event-dependent observation | 15,255 | 0.97 | 0.9          | 1.05         | 0.85            | 1.02              | 0.81                       | 1.3                        |
|                           | Primary analysis                          | 15,255 | 0.92 | 0.84         | 0.99         | 0.75            | 0.96              | 0.76                       | 1.22                       |
| Cardiac arrhythmia        | Adjusting for event-dependent observation | 13,552 | 0.81 | 0.73         | 0.9          | 0.22            | 0.85              | 0.67                       | 1.09                       |
|                           | Primary analysis                          | 13,552 | 0.82 | 0.74         | 0.9          | 0.24            | 0.86              | 0.67                       | 1.1                        |
| Bradycardia               | Adjusting for event-dependent observation | 12,752 | 0.83 | 0.74         | 0.93         | 0.29            | 0.87              | 0.68                       | 1.12                       |
|                           | Primary analysis                          | 12,752 | 0.83 | 0.74         | 0.93         | 0.28            | 0.87              | 0.68                       | 1.12                       |
| Chest pain or angina      | Adjusting for event-dependent observation | 14,060 | 0.91 | 0.82         | 0.99         | 0.69            | 0.95              | 0.75                       | 1.21                       |
|                           | Primary analysis                          | 14,060 | 0.9  | 0.82         | 0.99         | 0.65            | 0.94              | 0.74                       | 1.2                        |
| End stage renal disease   | Adjusting for event-dependent observation | 10,839 | 0.84 | 0.69         | 1.01         | 0.41            | 0.88              | 0.66                       | 1.18                       |
|                           | Primary analysis                          | 10,839 | 0.84 | 0.7          | 1.02         | 0.42            | 0.88              | 0.66                       | 1.19                       |
| Heart failure             | Adjusting for event-dependent observation | 14,531 | 1.06 | 0.98         | 1.16         | 0.37            | 1.12              | 0.88                       | 1.42                       |
|                           | Primary analysis                          | 14,531 | 1.04 | 0.96         | 1.13         | 0.48            | 1.09              | 0.86                       | 1.39                       |
| Hepatic failure           | Adjusting for event-dependent observation | 10,325 | 0.78 | 0.6          | 1.03         | 0.28            | 0.82              | 0.58                       | 1.17                       |
|                           | Primary analysis                          | 10,325 | 0.77 | 0.59         | 1.01         | 0.25            | 0.81              | 0.57                       | 1.15                       |
| Stroke                    | Adjusting for event-dependent observation | 14,536 | 0.96 | 0.88         | 1.05         | 0.91            | 1.01              | 0.8                        | 1.29                       |
|                           | Primary analysis                          | 14,536 | 0.89 | 0.81         | 0.97         | 0.57            | 0.93              | 0.73                       | 1.18                       |
| Cardiovascular events     | Adjusting for event-dependent observation | 14,573 | 1.05 | 0.97         | 1.14         | 0.43            | 1.1               | 0.87                       | 1.4                        |
|                           | Primary analysis                          | 14,573 | 0.97 | 0.89         | 1.05         | 0.89            | 1.02              | 0.8                        | 1.29                       |
| Transient ischemic attack | Adjusting for event-dependent observation | 13,727 | 0.95 | 0.87         | 1.05         | 0.93            | 1                 | 0.79                       | 1.28                       |
|                           | Primary analysis                          | 13,727 | 0.93 | 0.84         | 1.02         | 0.82            | 0.97              | 0.76                       | 1.24                       |
| Venous thromboembolism    | Adjusting for event-dependent observation | 16,067 | 0.72 | 0.67         | 0.78         | 0.02            | 0.76              | 0.6                        | 0.96                       |
|                           | Primary analysis                          | 16,067 | 0.68 | 0.63         | 0.73         | 0.01            | 0.71              | 0.56                       | 0.91                       |

**IRR=** Incidence Rate Ratio **95%CI LB=** 95% Confidence Interval Lower Boundary **95%CI UB=** 95% Confidence Interval Upper Boundary

Risk of hydroxychloroquine with azithromycin

**S10.7. VA**

| Outcome                   | Analysis                                  | Cases  | IRR  | 95%<br>CI LB | 95%<br>CI UB | Calibrated<br>P | Calibrated<br>IRR | Calibrated<br>95% CI<br>LB | Calibrated<br>95% CI<br>UB |
|---------------------------|-------------------------------------------|--------|------|--------------|--------------|-----------------|-------------------|----------------------------|----------------------------|
| Myocardial infarction     | Adjusting for event-dependent observation | 15,437 | 1.30 | 1.20         | 1.40         | 0.94            | 0.99              | 0.73                       | 1.34                       |
|                           | Primary analysis                          | 15,437 | 1.31 | 1.21         | 1.42         | 0.94            | 1.00              | 0.74                       | 1.36                       |
| Acute pancreatitis events | Adjusting for event-dependent observation | 11,824 | 1.27 | 1.11         | 1.45         | 0.87            | 0.97              | 0.71                       | 1.34                       |
|                           | Primary analysis                          | 11,825 | 1.28 | 1.12         | 1.46         | 0.91            | 0.98              | 0.71                       | 1.35                       |
| Acute renal failure       | Adjusting for event-dependent observation | 17,735 | NA   | NA           | NA           | NA              | NA                | NA                         | NA                         |
|                           | Primary analysis                          | 17,735 | 1.45 | 1.36         | 1.55         | 0.48            | 1.11              | 0.83                       | 1.50                       |
| Gastrointestinal bleeding | Adjusting for event-dependent observation | 15,613 | NA   | NA           | NA           | NA              | NA                | NA                         | NA                         |
|                           | Primary analysis                          | 15,613 | 1.27 | 1.18         | 1.37         | 0.87            | 0.97              | 0.72                       | 1.32                       |
| Cardiac arrhythmia        | Adjusting for event-dependent observation | 15,593 | 1.12 | 1.04         | 1.22         | 0.34            | 0.86              | 0.64                       | 1.17                       |
|                           | Primary analysis                          | 15,593 | 1.11 | 1.02         | 1.20         | 0.29            | 0.85              | 0.63                       | 1.15                       |
| Bradycardia               | Adjusting for event-dependent observation | 13,234 | 1.15 | 1.04         | 1.27         | 0.42            | 0.88              | 0.65                       | 1.20                       |
|                           | Primary analysis                          | 13,234 | 1.21 | 1.10         | 1.34         | 0.64            | 0.93              | 0.68                       | 1.26                       |
| Chest pain or angina      | Adjusting for event-dependent observation | 16,121 | NA   | NA           | NA           | NA              | NA                | NA                         | NA                         |
|                           | Primary analysis                          | 16,121 | 1.29 | 1.19         | 1.39         | 0.92            | 0.98              | 0.73                       | 1.33                       |
| End stage renal disease   | Adjusting for event-dependent observation | 11,687 | 1.36 | 1.19         | 1.56         | 0.79            | 1.04              | 0.76                       | 1.44                       |
|                           | Primary analysis                          | 11,687 | 1.33 | 1.16         | 1.52         | 0.92            | 1.02              | 0.74                       | 1.40                       |
| Heart failure             | Adjusting for event-dependent observation | 15,772 | 1.34 | 1.25         | 1.45         | 0.85            | 1.03              | 0.76                       | 1.39                       |
|                           | Primary analysis                          | 15,772 | 1.36 | 1.26         | 1.46         | 0.80            | 1.04              | 0.77                       | 1.40                       |
| Hepatic failure           | Adjusting for event-dependent observation | 11,066 | NA   | NA           | NA           | NA              | NA                | NA                         | NA                         |
|                           | Primary analysis                          | 11,066 | 1.03 | 0.85         | 1.23         | 0.18            | 0.79              | 0.56                       | 1.11                       |
| Stroke                    | Adjusting for event-dependent observation | 13,627 | 1.26 | 1.14         | 1.39         | 0.82            | 0.96              | 0.71                       | 1.31                       |
|                           | Primary analysis                          | 13,627 | 1.29 | 1.17         | 1.42         | 0.92            | 0.98              | 0.72                       | 1.34                       |
| Cardiovascular events     | Adjusting for event-dependent observation | 16,687 | NA   | NA           | NA           | NA              | NA                | NA                         | NA                         |
|                           | Primary analysis                          | 16,687 | 1.41 | 1.31         | 1.51         | 0.63            | 1.08              | 0.80                       | 1.46                       |
| Transient ischemic attack | Adjusting for event-dependent observation | 12,315 | NA   | NA           | NA           | NA              | NA                | NA                         | NA                         |
|                           | Primary analysis                          | 12,315 | 1.57 | 1.40         | 1.77         | 0.25            | 1.20              | 0.88                       | 1.65                       |
| Venous thromboembolism    | Adjusting for event-dependent observation | 17,469 | NA   | NA           | NA           | NA              | NA                | NA                         | NA                         |
|                           | Primary analysis                          | 17,469 | 1.12 | 1.05         | 1.20         | 0.33            | 0.86              | 0.64                       | 1.16                       |

**IRR=** Incidence Rate Ratio **95%CI LB=** 95% Confidence Interval Lower Boundary **95%CI UB=** 95% Confidence Interval Upper Boundary

## S11. Literature review sources

### S11.1. PubMed search strategy

(((((((("Antirheumatic Agents"[Mesh]) OR (((disease modifying antirheumatic drug\*[Title/Abstract] OR disease modifying anti-rheumatic drug\*[Title/Abstract] OR disease modifying antirheumatic agent\*[Title/Abstract] OR disease modifying anti-rheumatic agent\*[Title/Abstract]) OR (DMARD\*[Title/Abstract]))) OR (((((((("hydroxychloroquine"[MeSH Terms]) OR Hydroxychloroquine[Title/Abstract]) OR chloroquino[Title/Abstract]) OR ercoquin[Title/Abstract]) OR hydrochloroquine[Title/Abstract]) OR hydrochloroquine[Title/Abstract]) OR oxychloroquine[Title/Abstract]) OR plaquenil[Title/Abstract]) OR quensyl[Title/Abstract]) OR "sn 8137"[Title/Abstract])) OR (((((((("tocilizumab"[MeSH Terms]) OR tocilizumab[Title/Abstract]) OR actemra\*[Title/Abstract]) OR atlizumab[Title/Abstract]) OR lusinex[Title/Abstract]) OR "r 1569"[Title/Abstract]) OR r1569[Title/Abstract]) OR roactemra[Title/Abstract])) OR "baricitinib"[Supplementary Concept]) OR (((((((baricitinib[Title/Abstract]) OR "incb 028050"[Title/Abstract]) OR "incb 28050"[Title/Abstract]) OR "incb028050"[Title/Abstract]) OR "incb28050"[Title/Abstract]) OR "ly 3009104"[Title/Abstract]) OR "ly3009104"[Title/Abstract]) OR olumiant[Title/Abstract])) OR (((((((((((((((("methotrexate"[MeSH Terms]) OR methotrexate[Title/Abstract]) OR "a methopterin"[Title/Abstract]) OR abitrexate[Title/Abstract]) OR amethopterin\*[Title/Abstract]) OR ametopterin[Title/Abstract]) OR antifolan[Title/Abstract]) OR biotrexate[Title/Abstract]) OR canceren[Title/Abstract]) OR "cl 14377"[Title/Abstract]) OR cl14377[Title/Abstract]) OR emtexate[Title/Abstract]) OR emthexat\*[Title/Abstract]) OR enthexate[Title/Abstract]) OR emtrexate[Title/Abstract]) OR farmitrexat\*[Title/Abstract]) OR farmotrex[Title/Abstract]) OR folex\*[Title/Abstract]) OR ifamet[Title/Abstract]) OR imeth[Title/Abstract]) OR "intradose MTX"[Title/Abstract]) OR jylamvo[Title/Abstract]) OR lantarel[Title/Abstract]) OR ledertrexate[Title/Abstract])) OR (((((((((((((((((((maxtrex[Title/Abstract]) OR metex[Title/Abstract]) OR methoblastin[Title/Abstract]) OR methohexate[Title/Abstract]) OR methotrate[Title/Abstract]) OR methotrexat\*[Title/Abstract]) OR methoxtrexate[Title/Abstract]) OR methotrexate[Title/Abstract]) OR methylaminopterin\*[Title/Abstract]) OR meticil[Title/Abstract]) OR metoject[Title/Abstract]) OR methothrexate[Title/Abstract]) OR metotrex\*[Title/Abstract]) OR metrex[Title/Abstract]) OR mexate\*[Title/Abstract]) OR "mpi 5004"[Title/Abstract]) OR mpi5004[Title/Abstract]) OR MTX[Title/Abstract]) OR neotrexate[Title/Abstract]) OR nordimet[Title/Abstract]) OR novatrex[Title/Abstract]) OR "nsc 740"[Title/Abstract]) OR nsc740 AND "[Title/Abstract]) OR otrexup[Title/Abstract]) OR rasuvo[Title/Abstract]) OR reumatrex[Title/Abstract]) OR rheumatrex[Title/Abstract]) OR texate\*[Title/Abstract]) OR texorate[Title/Abstract]) OR trexall[Title/Abstract]) OR xaken[Title/Abstract]) OR xatmep[Title/Abstract]) OR zexate[Title/Abstract])) OR (((((((((((((((((((sulfasalazine[MeSH Terms]) OR salazosulfapyridine[Title/Abstract]) OR " AND azlufidine en-tabs AND "[Title/Abstract]) OR azopyrin\*[Title/Abstract]) OR azosulfidine[Title/Abstract]) OR azulfid\*[Title/Abstract]) OR azulfin[Title/Abstract]) OR benzosulfa[Title/Abstract]) OR " AND colo pleon AND "[Title/Abstract]) OR " AND colo-pleon AND "[Title/Abstract]) OR colopleon[Title/Abstract]) OR disalazin[Title/Abstract]) OR gastropyrin[Title/Abstract]) OR " AND pleon ra AND "[Title/Abstract]) OR " AND pyralin en AND "[Title/Abstract]) OR rorasul[Title/Abstract]) OR rosulfant[Title/Abstract]) OR " AND s.a.s.-500 AND "[Title/Abstract]) OR salaz\*[Title/Abstract]) OR " AND salicyl azo sulfapyridine AND "[Title/Abstract]) OR salicylazosulfapyridin\*[Title/Abstract]) OR salisulf[Title/Abstract]) OR salopyr[Title/Abstract]) OR saridine[Title/Abstract]) OR " AND sas 500 Title/Abstract) OR sulcolon[Title/Abstract]) OR sulfasalazine[Title/Abstract]) OR sulfasalazine[Title/Abstract]) OR sulfosalazine[Title/Abstract]) OR sulphasalazine[Title/Abstract]) OR zopyrin[Title/Abstract])) AND (((((((((((((((("coronavirus infections"[MeSH Terms]) OR coronavirus\*[Title/Abstract]) OR coronavirus\*[Title/Abstract]) OR "2019-nCoV"[Title/Abstract]) OR "COVID-19"[Title/Abstract]) OR "CORVID-19"[Title/Abstract]) OR "WN-CoV"[Title/Abstract]) OR "HCoV-19"[Title/Abstract]) OR CoV[Title/Abstract]) OR ncov[Title/Abstract]) OR "SARS-CoV-2"[Title/Abstract]) OR SARSCov19[Title/Abstract]) OR ncov\*wuhan[Title/Abstract]) OR "severe acute respiratory syndrome"[MeSH Terms]) OR "severe acute respiratory syndrome"[Title/Abstract]) OR "sudden acute respiratory syndrome"[Title/Abstract]) OR SARS[Title/Abstract]) OR MERS[Title/Abstract]) OR "Middle East Respiratory Syndrome"[Title/Abstract]) OR sars coronavirus[MeSH Terms]) OR viral infection[Title/Abstract]) OR viral disease[Title/Abstract]) OR virus infection[Title/Abstract]) OR virus disease[Title/Abstract]) OR viral pneumonia[MeSH Terms]) OR viral pneumonia[Title/Abstract]) OR influenza[MeSH Terms]) OR influenza[Title/Abstract]) OR flu[Title])

**S11.2. Embase search strategy (1974 to present)**

|    |                                                      |
|----|------------------------------------------------------|
| 1  | disease modifying antirheumatic drug/ (16237)        |
| 2  | disease modifying antirheumatic drug*.ti.ab. (6045)  |
| 3  | disease modifying anti-rheumatic drug*.ti.ab. (3750) |
| 4  | disease modifying antirheumatic agent*.ti.ab. (38)   |
| 5  | disease modifying anti-rheumatic agent*.ti.ab. (37)  |
| 6  | DMARD*.ti.ab. (14249)                                |
| 7  | hydroxychloroquine/ (23310)                          |
| 8  | Hydroxychloroquine.ti.ab. (7610)                     |
| 9  | chloroquinol.ti.ab. (2)                              |
| 10 | ercoquin.ti.ab. (0)                                  |
| 11 | hydrochloroquine.ti.ab. (56)                         |
| 12 | hydrochloroquine.ti.ab. (0)                          |
| 13 | oxychloroquine.ti.ab. (6)                            |
| 14 | plaquenil.ti.ab. (305)                               |
| 15 | quensyl.ti.ab. (4)                                   |
| 16 | "sn 8137".ti.ab. (1)                                 |
| 17 | tocilizumab/ (10914)                                 |
| 18 | tocilizumab.ti.ab. (6966)                            |
| 19 | actemra*.ti.ab. (71)                                 |
| 20 | atlizumab.ti.ab. (21)                                |
| 21 | lusinex.ti.ab. (0)                                   |
| 22 | "r 1569".ti.ab. (0)                                  |
| 23 | r1569.ti.ab. (0)                                     |
| 24 | roactemra.ti.ab. (43)                                |
| 25 | baricitinib/ (944)                                   |
| 26 | Baricitinib.ti.ab. (600)                             |
| 27 | "incb 028050".ti.ab. (2)                             |
| 28 | "incb 28050".ti.ab. (1)                              |
| 29 | "incb028050".ti.ab. (18)                             |
| 30 | "incb28050".ti.ab. (0)                               |
| 31 | "ly 3009104".ti.ab. (2)                              |
| 32 | "ly3009104".ti.ab. (19)                              |
| 33 | olumiant.ti.ab. (8)                                  |
| 34 | methotrexate/ (173846)                               |
| 35 | methotrexate.ti.ab. (65636)                          |
| 36 | "a methopterin".ti.ab. (0)                           |
| 37 | abitrexate.ti.ab. (0)                                |
| 38 | amethopterin*.ti.ab. (232)                           |
| 39 | ametopterin.ti.ab. (1)                               |
| 40 | antifolan.ti.ab. (0)                                 |
| 41 | biotrexate.ti.ab. (3)                                |
| 42 | canceren.ti.ab. (1)                                  |
| 43 | "cl 14377".ti.ab. (0)                                |
| 44 | cl14377.ti.ab. (0)                                   |
| 45 | emtexate.ti.ab. (0)                                  |
| 46 | emthexat*.ti.ab. (2)                                 |
| 47 | emtrexate.ti.ab. (1)                                 |
| 48 | enthexate.ti.ab. (0)                                 |
| 49 | farmitrexat*.ti.ab. (0)                              |
| 50 | farmotrex.ti.ab. (0)                                 |
| 51 | folex*.ti.ab. (3)                                    |
| 52 | ifamet.ti.ab. (0)                                    |
| 53 | imeth.ti.ab. (2)                                     |
| 54 | "intradose MTX".ti.ab. (0)                           |
| 55 | jylamvo.ti.ab. (0)                                   |
| 56 | lantarel.ti.ab. (3)                                  |
| 57 | ledertrexate.ti.ab. (4)                              |
| 58 | maxtrex.ti.ab. (0)                                   |
| 59 | metex.ti.ab. (12)                                    |
| 60 | methoblastin.ti.ab. (0)                              |
| 61 | methohexate.ti.ab. (0)                               |
| 62 | methotrate.ti.ab. (4)                                |

|     |                                                                                                                                                                                                                                                                                                                                                                                                                                                                                                                                                                                                                                                                                                                                                                          |
|-----|--------------------------------------------------------------------------------------------------------------------------------------------------------------------------------------------------------------------------------------------------------------------------------------------------------------------------------------------------------------------------------------------------------------------------------------------------------------------------------------------------------------------------------------------------------------------------------------------------------------------------------------------------------------------------------------------------------------------------------------------------------------------------|
| 63  | methotrexat*.ti,ab. (65844)                                                                                                                                                                                                                                                                                                                                                                                                                                                                                                                                                                                                                                                                                                                                              |
| 64  | methotrexate.ti,ab. (3)                                                                                                                                                                                                                                                                                                                                                                                                                                                                                                                                                                                                                                                                                                                                                  |
| 65  | methotrexate.ti,ab. (62)                                                                                                                                                                                                                                                                                                                                                                                                                                                                                                                                                                                                                                                                                                                                                 |
| 66  | methylaminopterin*.ti,ab. (6)                                                                                                                                                                                                                                                                                                                                                                                                                                                                                                                                                                                                                                                                                                                                            |
| 67  | metecil.ti,ab. (0)                                                                                                                                                                                                                                                                                                                                                                                                                                                                                                                                                                                                                                                                                                                                                       |
| 68  | metoject.ti,ab. (13)                                                                                                                                                                                                                                                                                                                                                                                                                                                                                                                                                                                                                                                                                                                                                     |
| 69  | metothrexate.ti,ab. (108)                                                                                                                                                                                                                                                                                                                                                                                                                                                                                                                                                                                                                                                                                                                                                |
| 70  | metotrex*.ti,ab. (257)                                                                                                                                                                                                                                                                                                                                                                                                                                                                                                                                                                                                                                                                                                                                                   |
| 71  | metrex.ti,ab. (18)                                                                                                                                                                                                                                                                                                                                                                                                                                                                                                                                                                                                                                                                                                                                                       |
| 72  | mexate*.ti,ab. (1)                                                                                                                                                                                                                                                                                                                                                                                                                                                                                                                                                                                                                                                                                                                                                       |
| 73  | "mpi 5004".ti,ab. (0)                                                                                                                                                                                                                                                                                                                                                                                                                                                                                                                                                                                                                                                                                                                                                    |
| 74  | mpi5004.ti,ab. (0)                                                                                                                                                                                                                                                                                                                                                                                                                                                                                                                                                                                                                                                                                                                                                       |
| 75  | MTX.ti,ab. (23376)                                                                                                                                                                                                                                                                                                                                                                                                                                                                                                                                                                                                                                                                                                                                                       |
| 76  | neotrexate.ti,ab. (0)                                                                                                                                                                                                                                                                                                                                                                                                                                                                                                                                                                                                                                                                                                                                                    |
| 77  | nordimet.ti,ab. (1)                                                                                                                                                                                                                                                                                                                                                                                                                                                                                                                                                                                                                                                                                                                                                      |
| 78  | novatrex.ti,ab. (0)                                                                                                                                                                                                                                                                                                                                                                                                                                                                                                                                                                                                                                                                                                                                                      |
| 79  | "nsc 740".ti,ab. (34)                                                                                                                                                                                                                                                                                                                                                                                                                                                                                                                                                                                                                                                                                                                                                    |
| 80  | "nsc740".ti,ab. (0)                                                                                                                                                                                                                                                                                                                                                                                                                                                                                                                                                                                                                                                                                                                                                      |
| 81  | otrexup.ti,ab. (2)                                                                                                                                                                                                                                                                                                                                                                                                                                                                                                                                                                                                                                                                                                                                                       |
| 82  | rasuvo.ti,ab. (1)                                                                                                                                                                                                                                                                                                                                                                                                                                                                                                                                                                                                                                                                                                                                                        |
| 83  | reumatrex.ti,ab. (0)                                                                                                                                                                                                                                                                                                                                                                                                                                                                                                                                                                                                                                                                                                                                                     |
| 84  | rheumatrex.ti,ab. (6)                                                                                                                                                                                                                                                                                                                                                                                                                                                                                                                                                                                                                                                                                                                                                    |
| 85  | texate*.ti,ab. (2)                                                                                                                                                                                                                                                                                                                                                                                                                                                                                                                                                                                                                                                                                                                                                       |
| 86  | texorate.ti,ab. (0)                                                                                                                                                                                                                                                                                                                                                                                                                                                                                                                                                                                                                                                                                                                                                      |
| 87  | trexall.ti,ab. (3)                                                                                                                                                                                                                                                                                                                                                                                                                                                                                                                                                                                                                                                                                                                                                       |
| 88  | xaken.ti,ab. (0)                                                                                                                                                                                                                                                                                                                                                                                                                                                                                                                                                                                                                                                                                                                                                         |
| 89  | xatmep.ti,ab. (0)                                                                                                                                                                                                                                                                                                                                                                                                                                                                                                                                                                                                                                                                                                                                                        |
| 90  | zexate.ti,ab. (0)                                                                                                                                                                                                                                                                                                                                                                                                                                                                                                                                                                                                                                                                                                                                                        |
| 91  | salazosulfapyridine/ (24991)                                                                                                                                                                                                                                                                                                                                                                                                                                                                                                                                                                                                                                                                                                                                             |
| 92  | salazosulfapyridine.ti,ab. (403)                                                                                                                                                                                                                                                                                                                                                                                                                                                                                                                                                                                                                                                                                                                                         |
| 93  | "azlufidine en-tabs".ti,ab. (0)                                                                                                                                                                                                                                                                                                                                                                                                                                                                                                                                                                                                                                                                                                                                          |
| 94  | azopyrin*.ti,ab. (0)                                                                                                                                                                                                                                                                                                                                                                                                                                                                                                                                                                                                                                                                                                                                                     |
| 95  | azosulfidine.ti,ab. (1)                                                                                                                                                                                                                                                                                                                                                                                                                                                                                                                                                                                                                                                                                                                                                  |
| 96  | azulfid*.ti,ab. (81)                                                                                                                                                                                                                                                                                                                                                                                                                                                                                                                                                                                                                                                                                                                                                     |
| 97  | azulfina.ti,ab. (0)                                                                                                                                                                                                                                                                                                                                                                                                                                                                                                                                                                                                                                                                                                                                                      |
| 98  | benzosulfa.ti,ab. (0)                                                                                                                                                                                                                                                                                                                                                                                                                                                                                                                                                                                                                                                                                                                                                    |
| 99  | "colo pleon".ti,ab. (2)                                                                                                                                                                                                                                                                                                                                                                                                                                                                                                                                                                                                                                                                                                                                                  |
| 100 | "colo-pleon".ti,ab. (2)                                                                                                                                                                                                                                                                                                                                                                                                                                                                                                                                                                                                                                                                                                                                                  |
| 101 | colopleon.ti,ab. (0)                                                                                                                                                                                                                                                                                                                                                                                                                                                                                                                                                                                                                                                                                                                                                     |
| 102 | disalazin.ti,ab. (0)                                                                                                                                                                                                                                                                                                                                                                                                                                                                                                                                                                                                                                                                                                                                                     |
| 103 | gastropyrin.ti,ab. (0)                                                                                                                                                                                                                                                                                                                                                                                                                                                                                                                                                                                                                                                                                                                                                   |
| 104 | "pleon ra".ti,ab. (0)                                                                                                                                                                                                                                                                                                                                                                                                                                                                                                                                                                                                                                                                                                                                                    |
| 105 | "pyralin en".ti,ab. (0)                                                                                                                                                                                                                                                                                                                                                                                                                                                                                                                                                                                                                                                                                                                                                  |
| 106 | rorasul.ti,ab. (0)                                                                                                                                                                                                                                                                                                                                                                                                                                                                                                                                                                                                                                                                                                                                                       |
| 107 | rosulfant.ti,ab. (0)                                                                                                                                                                                                                                                                                                                                                                                                                                                                                                                                                                                                                                                                                                                                                     |
| 108 | "s.a.s.-500".ti,ab. (2)                                                                                                                                                                                                                                                                                                                                                                                                                                                                                                                                                                                                                                                                                                                                                  |
| 109 | salaz*.ti,ab. (1188)                                                                                                                                                                                                                                                                                                                                                                                                                                                                                                                                                                                                                                                                                                                                                     |
| 110 | "salicyl azo sulfapyridine".ti,ab. (2)                                                                                                                                                                                                                                                                                                                                                                                                                                                                                                                                                                                                                                                                                                                                   |
| 111 | salicylazosulfapyridin*.ti,ab. (181)                                                                                                                                                                                                                                                                                                                                                                                                                                                                                                                                                                                                                                                                                                                                     |
| 112 | salisulf.ti,ab. (0)                                                                                                                                                                                                                                                                                                                                                                                                                                                                                                                                                                                                                                                                                                                                                      |
| 113 | salopyr.ti,ab. (0)                                                                                                                                                                                                                                                                                                                                                                                                                                                                                                                                                                                                                                                                                                                                                       |
| 114 | saridine.ti,ab. (0)                                                                                                                                                                                                                                                                                                                                                                                                                                                                                                                                                                                                                                                                                                                                                      |
| 115 | "sas 500".ti,ab. (2)                                                                                                                                                                                                                                                                                                                                                                                                                                                                                                                                                                                                                                                                                                                                                     |
| 116 | sulcolon.ti,ab. (0)                                                                                                                                                                                                                                                                                                                                                                                                                                                                                                                                                                                                                                                                                                                                                      |
| 117 | sulfasalazine.ti,ab. (5325)                                                                                                                                                                                                                                                                                                                                                                                                                                                                                                                                                                                                                                                                                                                                              |
| 118 | sulfasalazine.ti,ab. (4)                                                                                                                                                                                                                                                                                                                                                                                                                                                                                                                                                                                                                                                                                                                                                 |
| 119 | sulfosalazine.ti,ab. (5)                                                                                                                                                                                                                                                                                                                                                                                                                                                                                                                                                                                                                                                                                                                                                 |
| 120 | sulphasalazine.ti,ab. (1742)                                                                                                                                                                                                                                                                                                                                                                                                                                                                                                                                                                                                                                                                                                                                             |
| 121 | zopyrin.ti,ab. (0)                                                                                                                                                                                                                                                                                                                                                                                                                                                                                                                                                                                                                                                                                                                                                       |
| 122 | 1 or 2 or 3 or 4 or 5 or 6 or 7 or 8 or 9 or 10 or 11 or 12 or 13 or 14 or 15 or 16 or 17 or 18 or 19 or 20 or 21 or 22 or 23 or 24 or 25 or 26 or 27 or 28 or 29 or 30 or 31 or 32 or 33 or 34 or 35 or 36 or 37 or 38 or 39 or 40 or 41 or 42 or 43 or 44 or 45 or 46 or 47 or 48 or 49 or 50 or 51 or 52 or 53 or 54 or 55 or 56 or 57 or 58 or 59 or 60 or 61 or 62 or 63 or 64 or 65 or 66 or 67 or 68 or 69 or 70 or 71 or 72 or 73 or 74 or 75 or 76 or 77 or 78 or 79 or 80 or 81 or 82 or 83 or 84 or 85 or 86 or 87 or 88 or 89 or 90 or 91 or 92 or 93 or 94 or 95 or 96 or 97 or 98 or 99 or 100 or 101 or 102 or 103 or 104 or 105 or 106 or 107 or 108 or 109 or 110 or 111 or 112 or 113 or 114 or 115 or 116 or 117 or 118 or 119 or 120 or 121 (226851) |
| 123 | Coronavirus infection/ (1778)                                                                                                                                                                                                                                                                                                                                                                                                                                                                                                                                                                                                                                                                                                                                            |
| 124 | coronavirus*.ti,ab. (11962)                                                                                                                                                                                                                                                                                                                                                                                                                                                                                                                                                                                                                                                                                                                                              |

|     |                                                                                                                                                                                                    |
|-----|----------------------------------------------------------------------------------------------------------------------------------------------------------------------------------------------------|
| 125 | coronavirus*.ti.ab. (19)                                                                                                                                                                           |
| 126 | "2019-nCoV".ti.ab. (233)                                                                                                                                                                           |
| 127 | "COVID-19".ti.ab. (255)                                                                                                                                                                            |
| 128 | "CORVID-19".ti.ab. (0)                                                                                                                                                                             |
| 129 | "WN-CoV".ti.ab. (0)                                                                                                                                                                                |
| 130 | "HCoV-19".ti.ab. (0)                                                                                                                                                                               |
| 131 | CoV.ti.ab. (6191)                                                                                                                                                                                  |
| 132 | ncov.ti.ab. (246)                                                                                                                                                                                  |
| 133 | "SARS-CoV-2".ti.ab. (102)                                                                                                                                                                          |
| 134 | SARSCov19.ti.ab. (0)                                                                                                                                                                               |
| 135 | ncov*wuhan.ti.ab. (0)                                                                                                                                                                              |
| 136 | ((outbreak* or "respiratory illness" or "respiratory disease" or respiratory symptom* or seafood market or food market or wildlife) and (Wuhan or China or Chinese)).ti.ab. (5699)                 |
| 137 | severe acute respiratory syndrome/ (8192)                                                                                                                                                          |
| 138 | "severe acute respiratory syndrome".ti.ab. (4884)                                                                                                                                                  |
| 139 | "sudden acute respiratory syndrome".ti.ab. (9)                                                                                                                                                     |
| 140 | SARS.ti.ab. (9457)                                                                                                                                                                                 |
| 141 | MERS.ti.ab. (4478)                                                                                                                                                                                 |
| 142 | "Middle East Respiratory Syndrome".ti.ab. (1889)                                                                                                                                                   |
| 143 | SARS coronavirus/ (4579)                                                                                                                                                                           |
| 144 | virus infection/ (158726)                                                                                                                                                                          |
| 145 | ((virus* or viral) adj (infection* or disease*)).ti.ab. (154324)                                                                                                                                   |
| 146 | virus pneumonia/ (6683)                                                                                                                                                                            |
| 147 | ((viral or virus) adj3 pneumonia).ti.ab. (2989)                                                                                                                                                    |
| 148 | exp influenza/ (83690)                                                                                                                                                                             |
| 149 | influenza.ti.ab. (103586)                                                                                                                                                                          |
| 150 | flu.ti.ab. (19565)                                                                                                                                                                                 |
| 151 | 123 or 124 or 125 or 126 or 127 or 128 or 129 or 131 or 132 or 133 or 134 or 135 or 136 or 137 or 138 or 139 or 140 or 141 or 142 or 143 or 144 or 145 or 146 or 147 or 148 or 149 or 150 (408377) |
| 152 | 122 and 151 (4890)                                                                                                                                                                                 |
| 153 | limit 152 to (chinese or english or italian or spanish) (4681)                                                                                                                                     |

### S11.3. ClinicalTrials.gov search strategy

for: "disease modifying antirheumatic drug" OR "disease modifying anti-rheumatic drug" OR DMARD OR Hydroxychloroquine OR tocilizumab OR baricitinib OR methotrexate OR Sulfasalazine | Corona Virus Infection OR coronavirus OR coronavirus OR Covid-19 OR "2019-nCoV" OR "SARS-CoV-2" OR "SARSCov19" OR SARS OR "severe acute respiratory syndrome" OR MERS OR "Middle East Respiratory Syndrome" OR viral pneumonia OR influenza

### S11.4. ICTRP strategy

CORONAVIRUS INFECTIONS, CORONAVIRUS SARS-ASSOCIATED, CORONAVIRUS SARS-ASSOCIATED (DIAGNOSIS), MERS, RESPIRATORY SYNDROME, ACUTE, SEVERE, RESPIRATORY SYNDROME, SEVERE ACUTE, SARS, SARS ASSOC CORONAVIRUS, SARS-ASSOCIATED CORONAVIRUS, severe acute respiratory syndrome - middle east respiratory syndrome - CORONAVIRUS INFECT, CORONAVIRUS INFECTION, CORONAVIRUS INFECTION (DIAGNOSIS), CORONAVIRUS INFECTION (DISORDER), CORONAVIRUS INFECTION, UNSPECIFIED, CORONA VIRUS INFECTIONS, CORONAVIRUS INFECTIONS [DISEASE/FINDING], INFECT CORONAVIRUS, INFECTION, CORONAVIRUS, INFECTION; VIRAL, CORONAVIRUS, INFECTIONS, CORONAVIRUS, corona virus infection - PNEUMONIA VIRAL, PNEUMONIA VIRAL NOS, PNEUMONIA, VIRAL, PNEUMONIA, VIRAL [DISEASE/FINDING], PNEUMONIA; VIRAL, PNEUMONIA; VIRUS, PNEUMONIA; VIRAL, PNEUMONIAS, VIRAL, VIRAL PNEUMONITIS, VIRAL; PNEUMONIA, VIRUS; PNEUMONIA, viral pneumonia - coronavirus - CORONA VIRUS INFECTION, CORONAVIRIDAE, FAMILY CORONAVIRIDAE, FAMILY CORONAVIRIDAE (ORGANISM), coronavirus - sars-cov-2 - sarscov19 - AIDS, FLU, FLU SYNDROME, FLU VACCINE, FLU VACCINES, FLU, HUMAN, GRIPPE, HUMAN FLU, SYNDROME FLU, VACCINES, FLU, influenza - 2019-ncov - covid-19 - CORONAVIRUS INFECTIONS, FLJ20450, MERS, MITOCHONDRIAL SERRS, MTSERRS, RESPIRATORY SYNDROME, ACUTE, SEVERE, RESPIRATORY SYNDROME, SEVERE ACUTE, SERINE TRNA LIGASE 1, CYTOPLASMIC, SERINE TRNA LIGASE 2, MITOCHONDRIAL, SERRS, SERRSMT, SERS, SERYL-TRNA SYNTHETASE, SERYL-TRNA SYNTHETASE 2, SERYL-TRNA SYNTHETASE 2, MITOCHONDRIAL, SERYL-TRNA SYNTHETASE, MITOCHONDRIAL, SEVERE ACUTE RESPIRATORY SYNDROME, SEVERE ACUTE RESPIRATORY SYNDROME (DISORDER), SEVERE ACUTE RESPIRATORY SYNDROME [DISEASE/FINDING], SEVERE ACUTE RESPIRATORY SYNDROME NOS, SEVERE ACUTE RESPIRATORY SYNDROME VIRUS, SEVERE ACUTE RESPIRATORY SYNDROME-RELATED CORONAVIRUS, SEVERE ACUTE RESPIRATORY SYNDROME-RELATED CORONAVIRUS (ORGANISM), SYS, sars - CORONA VIRUS INFECTION, CORONAVIRUS INFECT, CORONAVIRUS INFECTION, CORONA VIRUS INFECTION (DIAGNOSIS), CORONAVIRUS INFECTION (DISORDER), CORONAVIRUS INFECTION, UNSPECIFIED, CORONAVIRUS INFECTIONS, CORONAVIRUS INFECTIONS [DISEASE/FINDING], CORONAVIRUS SARS-ASSOCIATED, CORONAVIRUS SARS-ASSOCIATED (DIAGNOSIS), INFECT CORONAVIRUS, INFECTION, CORONAVIRUS, INFECTION; VIRAL, CORONAVIRUS, INFECTIONS, CORONAVIRUS, RESPIRATORY SYNDROME, ACUTE, SEVERE, RESPIRATORY SYNDROME, SEVERE ACUTE, SARS, SARS (SEVERE ACUTE RESPIRATORY SYNDROME), SARS ASSOC CORONAVIRUS, SARS-ASSOCIATED CORONAVIRUS, SEA, SEA (ENVIRONMENT), SEAS, SEVERE ACUTE

RESPIRATORY SYNDROME, SEVERE ACUTE RESPIRATORY SYNDROME (DISORDER), SEVERE ACUTE RESPIRATORY SYNDROME (SARS), SEVERE ACUTE RESPIRATORY SYNDROME (SARS) (DIAGNOSIS), SEVERE ACUTE RESPIRATORY SYNDROME [DISEASE/FINDING], SEVERE ACUTE RESPIRATORY SYNDROME NOS, mers - disease modifying anti-rheumatic drug - disease modifying antirheumatic drug - CHLOROQUINE, HCQ, HYDROXYCHLOROCHIN, OXYCHLOROCHIN, OXYCHLOROQUINE, hydroxychloroquine - SALAZOSULFAPYRIDINE, SALAZOSULPHAPYRIDINE, SALICYLAZOSULFAPYRIDINE, SALICYLAZOSULPHAPYRIDINE, SULFANILAMIDE, SULPHASALAZINE, sulfasalazine - AMETHOPTERIN, MTX, methotrexate - ATLIZUMAB, MONOCLONAL ANTIBODY, MRA, MRA, tocilizumab - baricitinib - [MS100] ANTIRHEUMATICS, AGENTS, ANTI-RHEUMATIC, AGENTS, ANTIRHEUMATIC, ANTI RHEUMATIC AGENTS, ANTI RHEUMATIC DRUGS, ANTI-RHEUMATIC AGENT, ANTI-RHEUMATIC AGENT (PRODUCT), ANTI-RHEUMATIC AGENT, NOS, ANTI-RHEUMATIC AGENTS, ANTI-RHEUMATIC DRUGS, ANTIRHEUMATIC AGENT, ANTIRHEUMATIC AGENT [TC], ANTIRHEUMATIC AGENTS, ANTIRHEUMATIC DISEASE MODIFYING SECOND LINE DRUGS, ANTIRHEUMATIC DISEASE-MODIFYING SECOND-LINE DRUGS, ANTIRHEUMATIC DRUGS, ANTIRHEUMATIC DRUGS DIS MODIFYING, ANTIRHEUMATIC DRUGS, DISEASE MODIFYING, ANTIRHEUMATIC DRUGS, DISEASE-MODIFYING, ANTIRHEUMATICS, DIS MODIFYING ANTIRHEUMATIC DRUGS, DISEASE MODIFYING ANTIRHEUMATIC DRUGS, DISEASE MODIFYING, ANTIRHEUMATIC SECOND LINE DRUGS, DISEASE-MODIFYING ANTIRHEUMATIC DRUG, DISEASE-MODIFYING ANTIRHEUMATIC DRUGS, DISEASE-MODIFYING, ANTIRHEUMATIC SECOND-LINE DRUGS, DRUGS, ANTI-RHEUMATIC, DRUGS, ANTIRHEUMATIC, DRUGS, DISEASE-MODIFYING ANTIRHEUMATIC, dmand

## S12. Ethical Approval

All data partners received IRB approval or waiver in accordance to their institutional governance guidelines.

| Database   | Statement                                                                                                                                                                                                                                                                                                                                                                                                                                                                                                                                                                 |
|------------|---------------------------------------------------------------------------------------------------------------------------------------------------------------------------------------------------------------------------------------------------------------------------------------------------------------------------------------------------------------------------------------------------------------------------------------------------------------------------------------------------------------------------------------------------------------------------|
| AmbEMR     | This is a retrospective database study on de-identified data and is deemed not human subject research. Approval is provided for OHDSI community studies.                                                                                                                                                                                                                                                                                                                                                                                                                  |
| CCAE       | New England Institutional Review Board (IRB) and was determined to be exempt from broad IRB approval, as this research project did not involve human subject research.                                                                                                                                                                                                                                                                                                                                                                                                    |
| CPRD       | Approval for CPRD was provided by the Independent Scientific Advisory Committee (ISAC).<br>This study is based in part on data from the Clinical Practice Research Datalink obtained under licence from the UK Medicines and Healthcare products Regulatory Agency. The data is provided by patients and collected by the NHS as part of their care and support. The interpretation and conclusions contained in this study are those of the author/s alone. The protocol for this study ( 20_059R) was approved by the Independent Scientific Advisory Committee (ISAC). |
| DA Germany | This is a retrospective database study on de-identified data and is deemed not human subject research. Approval is provided for OHDSI community studies.                                                                                                                                                                                                                                                                                                                                                                                                                  |
| IMRD       | The present study is filed and under review for Scientific Review Committee for institutional adjudication. Due to the public health imperative of information related to these data, approval is provided for this publication.                                                                                                                                                                                                                                                                                                                                          |
| IPCI       | The present study was approved by the Scientific and Ethical Advisory Board of the IPCI project (project number: 4/2020).                                                                                                                                                                                                                                                                                                                                                                                                                                                 |
| JMDC       | New England Institutional Review Board (IRB) and was determined to be exempt from broad IRB approval, as this research project did not involve human subject research.                                                                                                                                                                                                                                                                                                                                                                                                    |
| MDCD       | New England Institutional Review Board (IRB) and was determined to be exempt from broad IRB approval, as this research project did not involve human subject research.                                                                                                                                                                                                                                                                                                                                                                                                    |
| MDCD       | New England Institutional Review Board (IRB) and was determined to be exempt from broad IRB approval, as this research project did not involve human subject research.                                                                                                                                                                                                                                                                                                                                                                                                    |

**S12, Continued.**

| Database      | Statement                                                                                                                                                                                                                                                                                                                                                       |
|---------------|-----------------------------------------------------------------------------------------------------------------------------------------------------------------------------------------------------------------------------------------------------------------------------------------------------------------------------------------------------------------|
| Open Claims   | This is a retrospective database study on de-identified data and is deemed not human subject research. Approval is provided for OHDSI community studies.                                                                                                                                                                                                        |
| Clinformatics | New England Institutional Review Board (IRB) and was determined to be exempt from broad IRB approval, as this research project did not involve human subject research.                                                                                                                                                                                          |
| Optum EHR     | New England Institutional Review Board (IRB) and was determined to be exempt from broad IRB approval, as this research project did not involve human subject research.                                                                                                                                                                                          |
| SIDIAP        | The use of SIDIAP data base was approved by the SIDIAP Scientific Committee and the IDIAPJGol Clinical Research Ethics Committee.                                                                                                                                                                                                                               |
| VA            | The use of VA data was reviewed by the Department of Veterans Affairs Central Institutional Review Board (IRB) and was determined to meet the criteria for exemption under Exemption Category 4(3) and approved the request for Waiver of HIPAA Authorization. The VA Privacy Office certified the release of aggregate analysis results for the meta-analysis. |

**S13. References**

- Suchard MA, Schuemie MJ, Krumholz HM, et al. Comprehensive comparative effectiveness and safety of first-line antihypertensive drug classes: a systematic, multinational, large-scale analysis. *Lancet* 2019; **394**(10211): 1816-26.
- Voss EA, Boyce RD, Ryan PB, van der Lei J, Rijnbeek PR, Schuemie MJ. Accuracy of an automated knowledge base for identifying drug adverse reactions. *Journal of biomedical informatics* 2017; **66**: 72-81.
- Singh S, Fouayzi H, Anzuoni K, Goldman L, Min JY, Griffin M *et al.* Diagnostic algorithms for cardiovascular death in administrative claims databases: A systematic review. *Drug Saf* 2018; **23**: 018–0754.
- Ooba N, Setoguchi S, Ando T, Sato T, Yamaguchi T, Mochizuki M *et al.* Claims-based definition of death in japanese claims database: Validity and implications. *PLoS One* 2013; **8**: e66116. doi: 10.1371/journal.pone.0066116. Print 2013.
- Robinson TE, Elley CR, Kenealy T, Drury PL. Development and validation of a predictive risk model for all-cause mortality in type 2 diabetes. *Diabetes Res Clin Pract* 2015; **108**: 482–8. doi: 10.1016/j.diabetes.2015.02.015. Epub 2015 Mar 16.
- Ammann EM, Schweizer ML, Robinson JG, Eschol JO, Kafa R, Girotra S *et al.* Chart validation of inpatient ICD-9-CM administrative diagnosis codes for acute myocardial infarction (AMI) among intravenous immune globulin (IGIV) users in the sentinel distributed database. *Pharmacoepidemiol Drug Saf* 2018; **27**: 398–404. doi: 10.1002/pds.4398. Epub 2018 Feb 15.
- Floyd JS, Blondon M, Moore KP, Boyko EJ, Smith NL. Validation of methods for assessing cardiovascular disease using electronic health data in a cohort of veterans with diabetes. *Pharmacoepidemiol Drug Saf* 2016; **25**: 467–71. doi: 10.1002/pds.3921. Epub 2015 Nov 11.
- Rubbo B, Fitzpatrick NK, Denaxas S, Daskalopoulou M, Yu N, Patel RS *et al.* Use of electronic health records to ascertain, validate and phenotype acute myocardial infarction: A systematic review and recommendations. *Int J Cardiol* 2015; **187**:705-11.: 10.1016/j.ijcard.2015.03.075. Epub 2015 Mar 5.



9. Wahl PM, Rodgers K, Schneeweiss S, Gage BF, Butler J, Wilmer C *et al.* Validation of claims-based diagnostic and procedure codes for cardiovascular and gastrointestinal serious adverse events in a commercially-insured population. *Pharmacoepidemiol Drug Saf* 2010; **19**: 596–603. doi: 10.1002/pds.1924.
10. Normand SL, Morris CN, Fung KS, McNeil BJ, Epstein AM. Development and validation of a claims based index for adjusting for risk of mortality: The case of acute myocardial infarction. *J Clin Epidemiol* 1995; **48**: 229–43.
11. Zaher C, Goldberg GA, Kadlubek P. Estimating angina prevalence in a managed care population. *Am J Manag Care* 2004; **10**: S339–46.
12. Floyd JS, Wellman R, Fuller S, Bansal N, Psaty BM, Boer IH de *et al.* Use of electronic health data to estimate heart failure events in a Population-Based cohort with CKD. *Clin J Am Soc Nephrol* 2016; **11**: 1954–1961. doi: 10.2215/CJN.03900416. Epub 2016 Aug 9.
13. Gini R, Schuemie MJ, Mazzaglia G, Lapi F, Francesconi P, Pasqua A *et al.* Automatic identification of type 2 diabetes, hypertension, ischaemic heart disease, heart failure and their levels of severity from italian general practitioners' electronic medical records: A validation study. *BMJ Open* 2016; **6**: e012413. doi: 10.1136/bmjopen-2016-012413.
14. Kaspar M, Fette G, Guder G, Seidlmayer L, Ertl M, Dietrich G *et al.* Underestimated prevalence of heart failure in hospital inpatients: A comparison of ICD codes and discharge letter information. *Clin Res Cardiol* 2018; **107**: 778–787. doi: 10.1007/s00392-018-1245-z. Epub 2018 Apr 17.
15. Li Q, Glynn RJ, Dreyer NA, Liu J, Mogun H, Setoguchi S. Validity of claims-based definitions of left ventricular systolic dysfunction in medicare patients. *Pharmacoepidemiol Drug Saf* 2011; **20**: 700–8. doi: 10.1002/pds.2146. Epub 2011 May 14.
16. Patel YR, Robbins JM, Kurgansky KE, Imran T, Orkaby AR, McLean RR *et al.* Development and validation of a heart failure with preserved ejection fraction cohort using electronic medical records. *BMC Cardiovasc Disord* 2018; **18**: 128. doi: 10.1186/s12872-018-0866-5.
17. Saczynski JS, Andrade SE, Harrold LR, Tjia J, Cutrona SL, Dodd KS *et al.* A systematic review of validated methods for identifying heart failure using administrative data. *Pharmacoepidemiol Drug Saf* 2012; **21**: 129–40. doi: 10.1002/pds.2313.
18. Schultz SE, Rothwell DM, Chen Z, Tu K. Identifying cases of congestive heart failure from administrative data: A validation study using primary care patient records. *Chronic Dis Inj Can* 2013; **33**: 160–6.
19. Feder SL, Redeker NS, Jeon S, Schulman-Green D, Womack JA, Tate JP *et al.* Validation of the ICD-9 diagnostic code for palliative care in patients hospitalized with heart failure within the veterans health administration. *Am J Hosp Palliat Care* 2018; **35**: 959–965. doi: 10.1177/1049909117747519. Epub 2017 Dec 18.
20. Rosenman M, He J, Martin J, Nutakki K, Eckert G, Lane K *et al.* Database queries for hospitalizations for acute congestive heart failure: Flexible methods and validation based on set theory. *J Am Med Inform Assoc* 2014; **21**: 345–52. doi: 10.1136/amiajnl-2013-001942. Epub 2013 Oct 10.
21. Quach S, Blais C, Quan H. Administrative data have high variation in validity for recording heart failure. *Can J Cardiol* 2010; **26**: 306–12.
22. Hennessy S, Leonard CE, Freeman CP, Deo R, Newcomb C, Kimmel SE *et al.* Validation of diagnostic codes for outpatient-originating sudden cardiac death and ventricular arrhythmia in medicaid and medicare claims data. *Pharmacoepidemiol Drug Saf* 2010; **19**: 555–62. doi: 10.1002/pds.1869.
23. Tamariz L, Harkins T, Nair V. A systematic review of validated methods for identifying ventricular arrhythmias using administrative and claims data. *Pharmacoepidemiol Drug Saf* 2012; **21**: 148–53. doi: 10.1002/pds.2340.

24. Gage BF, Waterman AD, Shannon W, Boehler M, Rich MW, Radford MJ. Validation of clinical classification schemes for predicting stroke: Results from the national registry of atrial fibrillation. *JAMA* 2001; **285**: 2864–70.
25. Jensen PN, Johnson K, Floyd J, Heckbert SR, Carnahan R, Dublin S. A systematic review of validated methods for identifying atrial fibrillation using administrative data. *Pharmacoepidemiol Drug Saf* 2012; **21**: 141–7. doi: 10.1002/pds.2317.
26. Karnik S, Tan SL, Berg B, Glurich I, Zhang J, Vidaillet HJ *et al*. Predicting atrial fibrillation and flutter using electronic health records. *Conf Proc IEEE Eng Med Biol Soc* 2012; **2012**:5562-5.: 10.1109/EMBC.2012.6347254.
27. Navar-Boggan AM, Rymer JA, Piccini JP, Shatila W, Ring L, Stafford JA *et al*. Accuracy and validation of an automated electronic algorithm to identify patients with atrial fibrillation at risk for stroke. *Am Heart J* 2015; **169**: 39–44.e2. doi: 10.1016/j.ahj.2014.09.014. Epub 2014 Oct 22.
28. Yahi A, Tatonetti NP. A knowledge-based, automated method for phenotyping in the EHR using only clinical pathology reports. *AMIA Jt Summits Transl Sci Proc* 2015; **2015**: 64–8. eCollection 2015.
29. Shin J, Gonzales M, Pletcher MJ. Risk of emergent bradycardia associated with initiation of immediate- or slow-release metoprolol. *Pharmacotherapy* 2013; **33**: 1353–61. doi: 10.1002/phar.1319. Epub 2013 Jun 27.
30. Turgeon RD, Fernandes KA, Juurlink D, Tu JV, Mamdani M. Ticagrelor and bradycardia: A nested case-control study. *Pharmacoepidemiol Drug Saf* 2015; **24**: 1281–5. doi: 10.1002/pds.3884. Epub 2015 Oct 7.
31. Andrade SE, Harrold LR, Tjia J, Cutrona SL, Saczynski JS, Dodd KS *et al*. A systematic review of validated methods for identifying cerebrovascular accident or transient ischemic attack using administrative data. *Pharmacoepidemiol Drug Saf* 2012; **21**: 100–28. doi: 10.1002/pds.2312.
32. Yuan Z, Voss EA, DeFalco FJ, Pan G, Ryan PB, Yannicelli D *et al*. Risk prediction for ischemic stroke and transient ischemic attack in patients without atrial fibrillation: A retrospective cohort study. *J Stroke Cerebrovasc Dis* 2017; **26**: 1721–1731. doi: 10.1016/j.jstrokecerebrovasdis.2017.03.036. Epub 2017 Apr 6.
33. Park TH, Choi JC. Validation of stroke and thrombolytic therapy in korean national health insurance claim data. *J Clin Neurol* 2016; **12**: 42–8. doi: 10.3988/jcn.2016.12.1.42. Epub 2015 Sep 11.
34. Gon Y, Kabata D, Yamamoto K, Shintani A, Todo K, Mochizuki H *et al*. Validation of an algorithm that determines stroke diagnostic code accuracy in a japanese hospital-based cancer registry using electronic medical records. *BMC Med Inform Decis Mak* 2017; **17**: 157. doi: 10.1186/s12911-017-0554-x.
35. Sung SF, Hsieh CY, Lin HJ, Chen YW, Yang YH, Li CY. Validation of algorithms to identify stroke risk factors in patients with acute ischemic stroke, transient ischemic attack, or intracerebral hemorrhage in an administrative claims database. *Int J Cardiol* 2016; **215**:277-82.: 10.1016/j.ijcard.2016.04.069. Epub 2016 Apr 14.
36. Tu K, Wang M, Young J, Green D, Ivers NM, Butt D *et al*. Validity of administrative data for identifying patients who have had a stroke or transient ischemic attack using EMERALD as a reference standard. *Can J Cardiol* 2013; **29**: 1388–94. doi: 10.1016/j.cjca.2013.07.676. Epub 2013 Sep 26.
37. Tamariz L, Harkins T, Nair V. A systematic review of validated methods for identifying venous thromboembolism using administrative and claims data. *Pharmacoepidemiol Drug Saf* 2012; **21**: 154–62. doi: 10.1002/pds.2341.
38. Burwen DR, Wu C, Cirillo D, Rossouw JE, Margolis KL, Limacher M *et al*. Venous thromboembolism incidence, recurrence, and mortality based on women’s health initiative data and medicare claims. *Thromb Res* 2017; **150**:78-85.: 10.1016/j.thromres.2016.11.015. Epub 2016 Nov 15.

39. Coleman CI, Peacock WF, Fermann GJ, Crivera C, Weeda ER, Hull M *et al.* External validation of a multivariable claims-based rule for predicting in-hospital mortality and 30-day post-pulmonary embolism complications. *BMC Health Serv Res* 2016; **16**: 610. doi: 10.1186/s12913-016-1855-y.
40. Ammann EM, Cuker A, Carnahan RM, Perepu US, Winiecki SK, Schweizer ML *et al.* Chart validation of inpatient international classification of diseases, ninth revision, clinical modification (ICD-9-CM) administrative diagnosis codes for venous thromboembolism (VTE) among intravenous immune globulin (IGIV) users in the sentinel distributed database. *Medicine* 2018; **97**: e9960. doi: 10.1097/MD.00000000000009960.
41. Goldstein JL, Zhao SZ, Burke TA, Palmer R, Allmen H von, Henderson SC. Incidence of outpatient physician claims for upper gastrointestinal symptoms among new users of celecoxib, ibuprofen, and naproxen in an insured population in the united states. *Am J Gastroenterol* 2003; **98**: 2627–34. doi: 10.1111/j.1572-0241.2003.08722.x.
42. Curtis JR, Chen SY, Werther W, John A, Johnson DA. Validation of ICD-9-CM codes to identify gastrointestinal perforation events in administrative claims data among hospitalized rheumatoid arthritis patients. *Pharmacoepidemiol Drug Saf* 2011; **20**: 1150–8. doi: 10.1002/pds.2215. Epub 2011 Aug 27.
43. Lanza LL, Walker AM, Bortnichak EA, Dreyer NA. Peptic ulcer and gastrointestinal hemorrhage associated with nonsteroidal anti-inflammatory drug use in patients younger than 65 years. A large health maintenance organization cohort study. *Arch Intern Med* 1995; **155**: 1371–7.
44. Lin KJ, Garcia Rodriguez LA, Hernandez-Diaz S. Systematic review of peptic ulcer disease incidence rates: Do studies without validation provide reliable estimates? *Pharmacoepidemiol Drug Saf* 2011; **20**: 718–28. doi: 10.1002/pds.2153. Epub 2011 May 27.
45. Patorno E, Gagne JJ, Lu CY, Haynes K, Sterrett AT, Roy J *et al.* The role of hemoglobin laboratory test results for the detection of upper gastrointestinal bleeding outcomes resulting from the use of medications in observational studies. *Drug Saf* 2017; **40**: 91–100. doi: 10.1007/s40264-016-0472-3.
46. Valkhoff VE, Coloma PM, Masclee GM, Gini R, Innocenti F, Lapi F *et al.* Validation study in four health-care databases: Upper gastrointestinal bleeding misclassification affects precision but not magnitude of drug-related upper gastrointestinal bleeding risk. *J Clin Epidemiol* 2014; **67**: 921–31. doi: 10.1016/j.jclinepi.2014.02.020. Epub 2014 May 1.
47. Afzal Z, Schuemie MJ, Blijderveen JC van, Sen EF, Sturkenboom MC, Kors JA. Improving sensitivity of machine learning methods for automated case identification from free-text electronic medical records. *BMC Med Inform Decis Mak* 2013; **13**:30. doi: 10.1186/1472-6947-13-30.
48. Lenihan CR, Montez-Rath ME, Mora Mangano CT, Chertow GM, Winkelmayr WC. Trends in acute kidney injury, associated use of dialysis, and mortality after cardiac surgery, 1999 to 2008. *Ann Thorac Surg* 2013; **95**: 20–8. doi: 10.1016/j.athoracsur.2012.05.131. Epub 2012 Dec 25.
49. Winkelmayr WC, Schneeweiss S, Mogun H, Patrick AR, Avorn J, Solomon DH. Identification of individuals with CKD from medicare claims data: A validation study. *Am J Kidney Dis* 2005; **46**: 225–32. doi: 10.1053/j.ajkd.2005.04.029.
50. Grams ME, Waikar SS, MacMahon B, Whelton S, Ballew SH, Coresh J. Performance and limitations of administrative data in the identification of AKI. *Clin J Am Soc Nephrol* 2014; **9**: 682–9. doi: 10.2215/CJN.07650713. Epub 2014 Jan 23.
51. Arnold J, Ng KP, Sims D, Gill P, Cockwell P, Ferro C. Incidence and impact on outcomes of acute kidney injury after a stroke: A systematic review and meta-analysis. *BMC Nephrol* 2018; **19**: 283. doi: 10.1186/s12882-018-1085-0.
52. Sutherland SM, Byrnes JJ, Kothari M, Longhurst CA, Dutta S, Garcia P *et al.* AKI in hospitalized children: Comparing the pRIFLE, AKIN, and KDIGO definitions. *Clin J Am Soc Nephrol* 2015; **10**: 554–61. doi: 10.2215/CJN.01900214. Epub 2015 Feb 3.

53. Waikar SS, Wald R, Chertow GM, Curhan GC, Winkelmayr WC, Liangos O *et al.* Validity of international classification of diseases, ninth revision, clinical modification codes for acute renal failure. *J Am Soc Nephrol* 2006; **17**: 1688–94. doi: 10.1681/ASN.2006010073. Epub 2006 Apr 26.
54. Rhee C, Murphy MV, Li L, Platt R, Klompas M. Improving documentation and coding for acute organ dysfunction biases estimates of changing sepsis severity and burden: A retrospective study. *Crit Care* 2015; **19**:338.: 10.1186/s13054-015-1048-9.
55. Chen HJ, Wang JJ, Tsay WI, Her SH, Lin CH, Chien CC. Epidemiology and outcome of acute pancreatitis in end-stage renal disease dialysis patients: A 10-year national cohort study. *Nephrol Dial Transplant* 2017; **32**: 1731–1736. doi: 10.1093/ndt/gfw400.
56. Muntner P, Gutierrez OM, Zhao H, Fox CS, Wright NC, Curtis JR *et al.* Validation study of medicare claims to identify older US adults with CKD using the reasons for geographic and racial differences in stroke (REGARDS) study. *Am J Kidney Dis* 2015; **65**: 249–58. doi: 10.1053/j.ajkd.2014.07.012. Epub 2014 Sep 19.
57. Shen AK, Kelman JA, Warnock R, Zhang W, Brereton S, McKean S *et al.* Beneficiary characteristics and vaccinations in the end-stage renal disease medicare beneficiary population, an analysis of claims data 2006-2015. *Vaccine* 2017; **35**: 7302–7308. doi: 10.1016/j.vaccine.2017.10.105. Epub 2017 Nov 10.
58. Bui CL, Kaye JA, Castellsague J, Calingaert B, McQuay LJ, Riera-Guardia N *et al.* Validation of acute liver injury cases in a population-based cohort study of oral antimicrobial users. *Curr Drug Saf* 2014; **9**: 23–8.
59. Cheetham TC, Lee J, Hunt CM, Niu F, Reisinger S, Murray R *et al.* An automated causality assessment algorithm to detect drug-induced liver injury in electronic medical record data. *Pharmacoepidemiol Drug Saf* 2014; **23**: 601–8. doi: 10.1002/pds.3531. Epub 2013 Oct 21.
60. Jinjuvadia K, Kwan W, Fontana RJ. Searching for a needle in a haystack: Use of ICD-9-CM codes in drug-induced liver injury. *Am J Gastroenterol* 2007; **102**: 2437–43. doi: 10.1111/j.1572-0241.2007.01456.x. Epub 2007 Jul 27.
61. Lo Re V 3rd, Carbonari DM, Forde KA, Goldberg D, Lewis JD, Haynes K *et al.* Validity of diagnostic codes and laboratory tests of liver dysfunction to identify acute liver failure events. *Pharmacoepidemiol Drug Saf* 2015; **24**: 676–83. doi: 10.1002/pds.3774. Epub 2015 Apr 10.
62. Lo Re V 3rd, Haynes K, Goldberg D, Forde KA, Carbonari DM, Leidl KB *et al.* Validity of diagnostic codes to identify cases of severe acute liver injury in the US food and drug administration’s Mini-Sentinel distributed database. *Pharmacoepidemiol Drug Saf* 2013; **22**: 861–72. doi: 10.1002/pds.3470. Epub 2013 Jun 25.
63. Overby CL, Pathak J, Gottesman O, Haerian K, Perotte A, Murphy S *et al.* A collaborative approach to developing an electronic health record phenotyping algorithm for drug-induced liver injury. *J Am Med Inform Assoc* 2013; **20**: e243–52. doi: 10.1136/amiajnl-2013-001930. Epub 2013 Jul 9.
64. Udo R, Maitland-van der Zee AH, Egberts TC, Breeijen JH den, Leufkens HG, Solinge WW van *et al.* Validity of diagnostic codes and laboratory measurements to identify patients with idiopathic acute liver injury in a hospital database. *Pharmacoepidemiol Drug Saf* 2016; **25**: 21–8. doi: 10.1002/pds.3824. Epub 2015 Jul 5.
65. Wing K, Bhaskaran K, Smeeth L, Staa TP van, Klungel OH, Reynolds RF *et al.* Optimising case detection within UK electronic health records: Use of multiple linked databases for detecting liver injury. *BMJ Open* 2016; **6**: e012102. doi: 10.1136/bmjopen-2016-012102.
66. Dore DD, Chaudhry S, Hoffman C, Seeger JD. Stratum-specific positive predictive values of claims for acute pancreatitis among commercial health insurance plan enrollees with diabetes mellitus. *Pharmacoepidemiol Drug Saf* 2011; **20**: 209–13. doi: 10.1002/pds.2077. Epub 2010 Dec 23.
67. Dore DD, Hussein M, Hoffman C, Pelletier EM, Smith DB, Seeger JD. A pooled analysis of exenatide use and risk of acute pancreatitis. *Curr Med Res Opin* 2013; **29**: 1577–86. doi: 10.1185/03007995.2013.838550. Epub 2013 Sep 13.

68. Yabe D, Kuwata H, Kaneko M, Ito C, Nishikino R, Murorani K *et al*. Use of the japanese health insurance claims database to assess the risk of acute pancreatitis in patients with diabetes: Comparison of DPP-4 inhibitors with other oral antidiabetic drugs. *Diabetes Obes Metab* 2015; **17**: 430–4. doi: 10.1111/dom.12381. Epub 2014 Sep 17.
